# Supplementary material for: MultiMetEval: Comparative and Multi-Objective Analysis of Genome-Scale Metabolic Models
Source: PLoS One. 2012 Dec 14;7(12):e51511. doi: 10.1371/journal.pone.0051511 (PMC3522732; doi:10.1371/journal.pone.0051511)
Supplement: Table S2 — Correlation between reaction presence/absence and maximum fluxes. For each compound, this table shows the squared correlation coefficient (r2) of the absence/presence of reactions in a metabolic model and the maximum flux obtained during flux balance analysis. The reaction name is the name as it is given in the SEED database, and the reaction formula corresponding to each reaction is given in the third column. (XLSX) [file pone.0051511.s002.xlsx]

## Sheet: Erythromycin
Reaction name	r2 value	Reaction formula
rxn08793	0.506805	1.0 Menaquinone_8_c + 1.0 _S__Lactate_c = 1.0 Pyruvate_c + 1.0 Menaquinol_8_c
rxn08792	0.506805	1.0 _S__Lactate_c + 1.0 Ubiquinone_8_c = 1.0 Pyruvate_c + 1.0 Ubiquinol_8_c
rxn00145	0.506805	1.0 _S__Lactate_c + 2.0 Ferricytochrome_c_c = 1.0 Pyruvate_c + 2.0 H__c + 2.0 Ferrocytochrome_c_c
rxn00609	0.506044	1.0 Inositol_1_phosphate_c = 1.0 D_Glucose_6_phosphate_c
rxn00141	0.506044	1.0 H2O_c + 1.0 S_Adenosyl_L_homocysteine_c = 1.0 L_Homocysteine_c + 1.0 Adenosine_c
rxn00330	0.445322	1.0 H2O_c + 1.0 Acetyl_CoA_c + 1.0 Glyoxylate_c = 1.0 _S__Malate_c + 1.0 CoA_c + 1.0 H__c
rxn00371	0.415929	1.0 NAD__c + 1.0 Formate_c = 1.0 NADH_c + 1.0 CO2_c
rxn11545	0.405716	0.5 Oxygen_c + 1.0 Precorrin_3A_c = 1.0 Precorrin_3B_c
rxn00379	0.369721	1.0 Sulfate_c + 1.0 ATP_c + 1.0 H__c = 1.0 Diphosphate_c + 1.0 Adenylyl_sulfate_c
rxn05239	0.369061	1.0 3__Phosphoadenylyl_sulfate_c + 1.0 trdrd_c = 1.0 Sulfite_c + 1.0 trdox_c + 1.0 Adenosine_3__5__bisphosphate_c
rxn00101	0.309058	2.0 H__c + 1.0 H2O_c + 1.0 Urea_c = 1.0 CO2_c + 2.0 NH3_c
rxn02792	0.302781	1.0 H__c + 1.0 L_Glutamate_c + 1.0 3_Cyano_L_alanine_c = 1.0 H2O_c + 1.0 CO2_c + 1.0 gamma_Glutamyl_beta_aminopropiononitrile_c
rxn02791	0.302781	1.0 L_Glutamate_c + 1.0 3_Cyano_L_alanine_c = 1.0 gamma_Glutamyl_beta_cyanoalanine_c + 1.0 H2O_c
rxn00350	0.302781	1.0 H2O_c + 1.0 Glutathione_c = 1.0 L_Glutamate_c + 1.0 Cys_Gly_c
t_cpd01171	0.293229	1.0 Phosphoenolpyruvate_c + 1.0 Galactitol_e = 1.0 Pyruvate_c + 1.0 Galactitol_1_phosphate_c
t_cpd00588	0.293229	1.0 Phosphoenolpyruvate_c + 1.0 D_Sorbitol_e = 1.0 Pyruvate_c + 1.0 Sorbitol_6_phosphate_c
t_cpd00108	0.293229	1.0 D_Galactose_e + 1.0 H__e = 1.0 H__c + 1.0 D_Galactose_c
t_cpd00084	0.293229	1.0 H2O_c + 1.0 L_Cysteine_e + 1.0 ATP_c = 1.0 H__c + 1.0 Orthophosphate_c + 1.0 L_Cysteine_c + 1.0 ADP_c
rxn10184	0.293229	1.0 Phosphoenolpyruvate_c + 1.0 D_Sorbitol_e = 1.0 Pyruvate_c + 1.0 Sorbitol_6_phosphate_c
rxn09674	0.293229	1.0 L_Lysine_e + 1.0 H__e = 1.0 L_Lysine_c + 1.0 H__c
rxn09450	0.293229	1.0 hexadecenoate_c + 1.0 CoA_c + 1.0 ATP_c + 1.0 H__c = 1.0 Diphosphate_c + 1.0 AMP_c + 1.0 Hexadecenoyl_CoA_c
rxn09449	0.293229	1.0 Octadecanoic_acid_c + 1.0 CoA_c + 1.0 ATP_c + 1.0 H__c = 1.0 Diphosphate_c + 1.0 Stearoyl_CoA_c + 1.0 AMP_c
rxn09448	0.293229	1.0 CoA_c + 1.0 octadecenoate_c + 1.0 ATP_c + 1.0 H__c = 1.0 Diphosphate_c + 1.0 AMP_c + 1.0 Octadecenoyl_CoA_c
rxn09128	0.293229	1.0 1_2_dioctadecanoyl_sn_glycerol_3_phosphate_c + 1.0 H2O_c = 1.0 2_octadecanoyl_sn_glycerol_3_phosphate_c + 1.0 H__c + 1.0 Octadecanoic_acid_c
rxn05890	0.293229	1.0 H2O_c + 1.0 Oxidized_c + 1.0 Nitric_oxide_c = 1.0 Reduced_c + 1.0 Nitrite_c + 2.0 H__c
rxn05736	0.293229	1.0 H__c + 1.0 CoA_c + 1.0 Tetradecanoic_acid_c + 1.0 ATP_c = 1.0 Tetradecanoyl_CoA_c + 1.0 Diphosphate_c + 1.0 AMP_c
rxn05610	0.293229	1.0 Phosphoenolpyruvate_c + 1.0 D_Mannose_e = 1.0 Pyruvate_c + 1.0 D_Mannose_6_phosphate_c
rxn05567	0.293229	1.0 Phosphoenolpyruvate_c + 1.0 Galactitol_e = 1.0 Pyruvate_c + 1.0 Galactitol_1_phosphate_c
rxn05566	0.293229	1.0 D_Galactose_e + 1.0 H__e = 1.0 H__c + 1.0 D_Galactose_c
rxn05252	0.293229	1.0 fa11_c + 1.0 CoA_c + 1.0 ATP_c + 1.0 H__c = 1.0 Diphosphate_c + 1.0 fa11coa_c + 1.0 AMP_c
rxn05251	0.293229	1.0 H__c + 1.0 CoA_c + 1.0 ATP_c + 1.0 fa12_c = 1.0 Diphosphate_c + 1.0 AMP_c + 1.0 fa12coa_c
rxn05250	0.293229	1.0 fa6_c + 1.0 H__c + 1.0 CoA_c + 1.0 ATP_c = 1.0 Diphosphate_c + 1.0 fa6coa_c + 1.0 AMP_c
rxn05249	0.293229	1.0 H__c + 1.0 CoA_c + 1.0 fa3_c + 1.0 ATP_c = 1.0 Diphosphate_c + 1.0 AMP_c + 1.0 fa3coa_c
rxn05248	0.293229	1.0 H__c + 1.0 CoA_c + 1.0 ATP_c + 1.0 fa4_c = 1.0 Diphosphate_c + 1.0 AMP_c + 1.0 fa4coa_c
rxn05247	0.293229	1.0 H__c + 1.0 fa1_c + 1.0 CoA_c + 1.0 ATP_c = 1.0 fa1coa_c + 1.0 Diphosphate_c + 1.0 AMP_c
rxn03885	0.293229	1.0 D_Mannonate_c = 1.0 H2O_c + 1.0 2_Dehydro_3_deoxy_D_gluconate_c
rxn03062	0.293229	1.0 NAD__c + 1.0 _2R_3S__3_Isopropylmalate_c = 1.0 _2S__2_Isopropyl_3_oxosuccinate_c + 1.0 H__c + 1.0 NADH_c
rxn02811	0.293229	1.0 _2R_3S__3_Isopropylmalate_c = 1.0 H2O_c + 1.0 2_Isopropylmaleate_c
rxn02789	0.293229	1.0 _2S__2_Isopropylmalate_c = 1.0 H2O_c + 1.0 2_Isopropylmaleate_c
rxn01352	0.293229	1.0 H2O_c + 1.0 dGTP_c = 1.0 H__c + 1.0 Deoxyguanosine_c + 1.0 Triphosphate_c
rxn01217	0.293229	1.0 dCMP_c + 1.0 H__c + 1.0 H2O_c = 1.0 NH3_c + 1.0 dUMP_c
rxn00947	0.293229	1.0 Hexadecanoic_acid_c + 1.0 CoA_c + 1.0 ATP_c + 1.0 H__c = 1.0 Palmitoyl_CoA_c + 1.0 Diphosphate_c + 1.0 AMP_c
rxn00902	0.293229	1.0 3_Methyl_2_oxobutanoic_acid_c + 1.0 H2O_c + 1.0 Acetyl_CoA_c = 1.0 _2S__2_Isopropylmalate_c + 1.0 CoA_c + 1.0 H__c
rxn00612	0.293229	1.0 sn_Glycerol_3_phosphate_c + 1.0 NADP__c = 1.0 Glycerone_phosphate_c + 1.0 H__c + 1.0 NADPH_c
rxn00611	0.293229	1.0 NAD__c + 1.0 sn_Glycerol_3_phosphate_c = 1.0 Glycerone_phosphate_c + 1.0 H__c + 1.0 NADH_c
rxn00213	0.293229	1.0 UTP_c + 1.0 D_Glucose_1_phosphate_c = 1.0 Diphosphate_c + 1.0 UDP_glucose_c
rxn02971	0.289616	1.0 2_5_Dihydro_5_oxofuran_2_acetate_c = 1.0 2_Oxo_2_3_dihydrofuran_5_acetate_c
rxn02305	0.289038	1.0 H__c + 1.0 4_Methyl_5__2_phosphoethyl__thiazole_c + 1.0 2_Methyl_4_amino_5_hydroxymethylpyrimidine_diphosphate_c = 1.0 Diphosphate_c + 1.0 Thiamin_monophosphate_c
rxn00346	0.289038	1.0 H__c + 1.0 L_Aspartate_c = 1.0 CO2_c + 1.0 beta_Alanine_c
rxn05153	0.288479	1.0 H2O_c + 1.0 ATP_c + 1.0 Sulfate_e = 1.0 Sulfate_c + 1.0 Orthophosphate_c + 1.0 ADP_c + 1.0 H__c
rxn00358	0.283592	1.0 UDP_D_galactose_c = 1.0 UDP_alpha_D_galacto_1_4_furanose_c
rxn01452	0.282494	1.0 _S__3_Hydroxybutanoyl_CoA_c + 1.0 NADP__c = 1.0 H__c + 1.0 NADPH_c + 1.0 Acetoacetyl_CoA_c
rxn01207	0.273995	1.0 NAD__c + 1.0 4_Methyl_2_oxopentanoate_c + 1.0 CoA_c = 1.0 NADH_c + 1.0 3_Methylbutanoyl_CoA_c + 1.0 CO2_c
rxn02483	0.273431	1.0 H__c + 1.0 2_Carboxy_2_5_dihydro_5_oxofuran_2_acetate_c = 1.0 CO2_c + 1.0 2_Oxo_2_3_dihydrofuran_5_acetate_c
t_cpd00314	0.26503	1.0 Mannitol_e + 1.0 Phosphoenolpyruvate_c = 1.0 Pyruvate_c + 1.0 D_Mannitol_1_phosphate_c
rxn05617	0.26503	1.0 Mannitol_e + 1.0 Phosphoenolpyruvate_c = 1.0 Pyruvate_c + 1.0 D_Mannitol_1_phosphate_c
rxn07435	0.26004	1.0 2_Methyl_1_hydroxybutyl_ThPP_c + 1.0 Lipoamide_c = 1.0 Thiamin_diphosphate_c + 1.0 _Dihydrolipoyllysine_residue__2_methylpropanoyl_transferase__S__2_methylbutanoyl_dihydrolipoyllysine_c
rxn03433	0.254051	1.0 H2O_c + 1.0 _S__3_Hydroxyisobutyryl_CoA_c = 1.0 H__c + 1.0 CoA_c + 1.0 3_Hydroxy_2_methylpropanoate_c
rxn07433	0.254041	1.0 3_Methyl_1_hydroxybutyl_ThPP_c + 1.0 Lipoamide_c = 1.0 Thiamin_diphosphate_c + 1.0 _Dihydrolipoyllysine_residue__2_methylpropanoyl_transferase__S__3_methylbutanoyl_dihydrolipoyllysine_c
rxn07432	0.254041	1.0 Thiamin_diphosphate_c + 1.0 4_Methyl_2_oxopentanoate_c + 1.0 H__c = 1.0 3_Methyl_1_hydroxybutyl_ThPP_c + 1.0 CO2_c
rxn07434	0.247451	1.0 Thiamin_diphosphate_c + 1.0 _S__3_Methyl_2_oxopentanoic_acid_c + 1.0 H__c = 1.0 CO2_c + 1.0 2_Methyl_1_hydroxybutyl_ThPP_c
rxn00147	0.246392	1.0 Pyruvate_c + 1.0 H2O_c + 1.0 ATP_c = 1.0 H__c + 1.0 Orthophosphate_c + 1.0 AMP_c + 1.0 Phosphoenolpyruvate_c
rxn02144	0.246162	1.0 H2O_c + 1.0 2_Oxo_2_3_dihydrofuran_5_acetate_c = 1.0 H__c + 1.0 3_Oxoadipate_c
rxn01807	0.244674	1.0 Pyridoxamine_c + 1.0 ATP_c = 1.0 Pyridoxamine_phosphate_c + 1.0 ADP_c
rxn01396	0.244674	1.0 Pyridoxine_c + 1.0 ATP_c = 1.0 Pyridoxine_phosphate_c + 1.0 ADP_c
rxn00124	0.244674	1.0 Pyridoxal_c + 1.0 ATP_c = 1.0 Pyridoxal_phosphate_c + 1.0 ADP_c
rxn01143	0.243522	1.0 Thymidine_c + 1.0 ATP_c = 1.0 dTMP_c + 1.0 ADP_c
rxn00265	0.231554	1.0 Citrate_c = 1.0 Acetate_c + 1.0 Oxaloacetate_c
rxn00872	0.23032	1.0 Butanoyl_CoA_c + 1.0 FAD_c = 1.0 FADH2_c + 1.0 Crotonoyl_CoA_c
rxn00784	0.225758	1.0 2_Deoxy_D_ribose_5_phosphate_c = 1.0 D_Glyceraldehyde_3_phosphate_c + 1.0 Acetaldehyde_c
rxn00250	0.22289	1.0 Pyruvate_c + 1.0 HCO3__c + 1.0 ATP_c = 1.0 H__c + 1.0 Orthophosphate_c + 1.0 ADP_c + 1.0 Oxaloacetate_c
rxn00305	0.222793	1.0 H__c + 1.0 GTP_c + 1.0 Oxaloacetate_c = 1.0 CO2_c + 1.0 GDP_c + 1.0 Phosphoenolpyruvate_c
rxn07431	0.222	1.0 2_Methyl_1_hydroxypropyl_ThPP_c + 1.0 Lipoamide_c = 1.0 Thiamin_diphosphate_c + 1.0 S__2_Methylpropanoyl__dihydrolipoamide_c
rxn07430	0.222	1.0 3_Methyl_2_oxobutanoic_acid_c + 1.0 H__c + 1.0 Thiamin_diphosphate_c = 1.0 CO2_c + 1.0 2_Methyl_1_hydroxypropyl_ThPP_c
t_cpd00100	0.219236	1.0 Glycerol_c = 1.0 Glycerol_e
rxn01053	0.218475	1.0 NAD__c + 1.0 H2O_c + 1.0 _S__Lactaldehyde_c = 2.0 H__c + 1.0 NADH_c + 1.0 _S__Lactate_c
t_cpd00268	0.217344	1.0 H2O_c + 1.0 Thiosulfate_e + 1.0 ATP_c = 1.0 H__c + 1.0 Orthophosphate_c + 1.0 Thiosulfate_c + 1.0 ADP_c
rxn05176	0.217344	1.0 H2O_c + 1.0 Thiosulfate_e + 1.0 ATP_c = 1.0 H__c + 1.0 Orthophosphate_c + 1.0 Thiosulfate_c + 1.0 ADP_c
rxn04783	0.215162	1.0 5__Phosphoribosylglycinamide_c + 1.0 Formate_c + 1.0 ATP_c = 1.0 5__Phosphoribosyl_N_formylglycinamide_c + 1.0 H__c + 1.0 Orthophosphate_c + 1.0 ADP_c
rxn00209	0.215134	1.0 Pyridoxine_phosphate_c + 1.0 Oxygen_c = 1.0 H2O2_c + 1.0 Pyridoxal_phosphate_c
rxn00208	0.215134	1.0 H2O_c + 1.0 Pyridoxamine_phosphate_c + 1.0 Oxygen_c = 1.0 H2O2_c + 1.0 Pyridoxal_phosphate_c + 1.0 NH3_c
rxn01851	0.214373	1.0 NAD__c + 1.0 H2O_c + 1.0 4_Aminobutyraldehyde_c = 2.0 H__c + 1.0 NADH_c + 1.0 4_Aminobutanoate_c
rxn01329	0.214373	1.0 D_Mannose_6_phosphate_c = 1.0 D_Mannose_1_phosphate_c
rxn00559	0.214373	1.0 D_Mannose_6_phosphate_c = 1.0 D_Fructose_6_phosphate_c
rxn00549	0.214373	1.0 H2O_c + 1.0 D_Fructose_1_6_bisphosphate_c = 1.0 H__c + 1.0 Orthophosphate_c + 1.0 D_Fructose_6_phosphate_c
t_cpd00013	0.212545	1.0 NH3_e = 1.0 NH3_c
rxn05581	0.212423	1.0 Glycerol_c = 1.0 Glycerol_e
t_cpd00355	0.209047	1.0 Nicotinamide_D_ribonucleotide_e = 1.0 Nicotinamide_D_ribonucleotide_c
rxn05466	0.207331	1.0 NH3_e = 1.0 NH3_c
rxn02296	0.206842	1.0 H__c + 1.0 CoA_c + 1.0 ATP_c + 1.0 6_Carboxyhexanoate_c = 1.0 Diphosphate_c + 1.0 6_Carboxyhexanoyl_CoA_c + 1.0 AMP_c
rxn03236	0.205924	1.0 _6R__6__L_erythro_1_2_Dihydroxypropyl__5_6_7_8_tetrahydro_4a__hydroxypterin_c = 1.0 H2O_c + 1.0 Dihydrobiopterin_c
t_cpd03725	0.204971	1.0 H2O_c + 1.0 Fe_III_dicitrate_e + 1.0 ATP_c = 1.0 H__c + 1.0 Orthophosphate_c + 1.0 Fe_III_dicitrate_c + 1.0 ADP_c
rxn05189	0.204971	1.0 H2O_c + 1.0 Fe_III_dicitrate_e + 1.0 ATP_c = 1.0 H__c + 1.0 Orthophosphate_c + 1.0 Fe_III_dicitrate_c + 1.0 ADP_c
rxn00985	0.204067	1.0 Propanoate_c + 1.0 ATP_c + 1.0 H__c = 1.0 Propanoyl_phosphate_c + 1.0 ADP_c
rxn00225	0.204067	1.0 H__c + 1.0 ATP_c + 1.0 Acetate_c = 1.0 Acetyl_phosphate_c + 1.0 ADP_c
t_cpd11574	0.20344	1.0 H2O_c + 1.0 Molybdate_e + 1.0 ATP_c = 1.0 H__c + 1.0 Orthophosphate_c + 1.0 Molybdate_c + 1.0 ADP_c
rxn05619	0.20344	1.0 H2O_c + 1.0 Molybdate_e + 1.0 ATP_c = 1.0 H__c + 1.0 Orthophosphate_c + 1.0 Molybdate_c + 1.0 ADP_c
rxn01924	0.202564	1.0 2_Methylpropanoyl_CoA_c + 1.0 FAD_c = 1.0 2_Methylprop_2_enoyl_CoA_c + 1.0 FADH2_c
rxn00139	0.20156	1.0 5_Phospho_alpha_D_ribose_1_diphosphate_c + 1.0 Adenine_c = 1.0 Diphosphate_c + 1.0 AMP_c
rxn02269	0.200156	1.0 NAD__c + 1.0 _S__3_Methyl_2_oxopentanoic_acid_c + 1.0 CoA_c = 1.0 2_Methylbutanoyl_CoA_c + 1.0 NADH_c + 1.0 CO2_c
rxn05654	0.197764	1.0 Succinate_e + 1.0 H__e = 1.0 Succinate_c + 1.0 H__c
rxn05561	0.197764	1.0 Fumarate_e + 1.0 H__e = 1.0 H__c + 1.0 Fumarate_c
rxn00938	0.195848	1.0 Nicotinamide_c + 1.0 H2O_c = 1.0 Nicotinate_c + 1.0 NH3_c
rxn02774	0.193388	1.0 NAD__c + 1.0 Precorrin_2_c = 1.0 H__c + 1.0 Sirohydrochlorin_c + 1.0 NADH_c
rxn02287	0.193388	2.0 S_Adenosyl_L_methionine_c + 1.0 Uroporphyrinogen_III_c = 1.0 Precorrin_2_c + 2.0 H__c + 2.0 S_Adenosyl_L_homocysteine_c
rxn05958	0.192559	1.0 S_Ribosyl_L_homocysteine_c = 1.0 _S__4_5_dihydroxypentan_2_3_dione_c + 1.0 L_Homocysteine_c
rxn05518	0.190295	1.0 Cellobiose_e = 1.0 Cellobiose_c
t_cpd00158	0.190295	1.0 Cellobiose_e = 1.0 Cellobiose_c
rxn00467	0.188143	1.0 2_Oxoglutarate_c + 1.0 L_Ornithine_c = 1.0 L_Glutamate_c + 1.0 L_Glutamate_5_semialdehyde_c
rxn00546	0.187874	1.0 NAD__c + 1.0 D_Mannitol_1_phosphate_c = 1.0 H__c + 1.0 NADH_c + 1.0 D_Fructose_6_phosphate_c
t_cpd00137	0.183908	1.0 H2O_c + 1.0 Fe3__e + 1.0 ATP_c + 2.0 Citrate_e = 2.0 Citrate_c + 1.0 Orthophosphate_c + 1.0 Fe3__c + 1.0 ADP_c + 1.0 H__c
rxn05557	0.183908	1.0 H2O_c + 1.0 Fe3__e + 1.0 ATP_c + 2.0 Citrate_e = 2.0 Citrate_c + 1.0 Orthophosphate_c + 1.0 Fe3__c + 1.0 ADP_c + 1.0 H__c
rxn00194	0.183339	1.0 H__c + 1.0 L_Glutamate_c = 1.0 CO2_c + 1.0 4_Aminobutanoate_c
rxn02056	0.181517	2.0 H__c + 1.0 Siroheme_c = 1.0 Sirohydrochlorin_c + 1.0 Fe2__c
rxn08901	0.178719	1.0 Menaquinone_8_c + 1.0 _S__Malate_c = 1.0 Oxaloacetate_c + 1.0 Menaquinol_8_c
rxn08900	0.178719	1.0 _S__Malate_c + 1.0 Ubiquinone_8_c = 1.0 Oxaloacetate_c + 1.0 Ubiquinol_8_c
rxn00935	0.178719	1.0 _S__Malate_c + 1.0 FAD_c = 1.0 FADH2_c + 1.0 Oxaloacetate_c
rxn09988	0.177555	2.0 H2O_c + 1.0 alpha_L_Arabinan_c = 3.0 L_Arabinose_c
rxn01044	0.17753	1.0 D_Xylose_c = 1.0 D_Xylulose_c
rxn03061	0.17604	1.0 _2S_3R__3_Hydroxybutane_1_2_3_tricarboxylate_c = 1.0 H2O_c + 1.0 _Z__But_2_ene_1_2_3_tricarboxylate_c
rxn00988	0.174666	1.0 H__c + 1.0 Acetoacetate_c + 1.0 CoA_c + 1.0 ATP_c = 1.0 Diphosphate_c + 1.0 AMP_c + 1.0 Acetoacetyl_CoA_c
rxn01893	0.171366	1.0 H2O_c + 1.0 2_Hydroxy_2_4_pentadienoate_c = 1.0 4_Hydroxy_2_oxopentanoate_c
rxn10210	0.171339	1.0 sn_Glycerol_3_phosphate_c + 1.0 fa6coa_c = 1.0 1_isohexadecanoyl_sn_glycerol_3_phosphate_c + 1.0 CoA_c
rxn10209	0.171339	1.0 sn_Glycerol_3_phosphate_c + 1.0 fa4coa_c = 1.0 CoA_c + 1.0 1_anteisopentadecanoyl_sn_glycerol_3_phosphate_c
rxn10208	0.171339	1.0 sn_Glycerol_3_phosphate_c + 1.0 fa3coa_c = 1.0 CoA_c + 1.0 1_isopentadecanoyl_sn_glycerol_3_phosphate_c
rxn10207	0.171339	1.0 fa1coa_c + 1.0 sn_Glycerol_3_phosphate_c = 1.0 1_isotetradecanoyl_sn_glycerol_3_phosphate_c + 1.0 CoA_c
rxn10203	0.171339	1.0 Tetradecanoyl_CoA_c + 1.0 sn_Glycerol_3_phosphate_c = 1.0 CoA_c + 1.0 1_tetradecanoyl_sn_glycerol_3_phosphate_c
rxn10202	0.171339	1.0 sn_Glycerol_3_phosphate_c + 1.0 Palmitoyl_CoA_c = 1.0 CoA_c + 1.0 1_hexadecanoyl_sn_glycerol_3_phosphate_c
rxn08552	0.171339	1.0 Oleoyl__acyl_carrier_protein__c + 1.0 sn_Glycerol_3_phosphate_c = 1.0 1_octadec_11_enoyl_sn_glycerol_3_phosphate_c + 1.0 Acyl_carrier_protein_c
rxn08551	0.171339	1.0 sn_Glycerol_3_phosphate_c + 1.0 Octadecanoyl_ACP_c = 1.0 1_octadecanoyl_sn_glycerol_3_phosphate_c + 1.0 Acyl_carrier_protein_c
rxn08550	0.171339	1.0 sn_Glycerol_3_phosphate_c + 1.0 Hexadecenoyl_ACP_c = 1.0 1_hexadec_9_enoyl_sn_glycerol_3_phosphate_c + 1.0 Acyl_carrier_protein_c
rxn08549	0.171339	1.0 sn_Glycerol_3_phosphate_c + 1.0 Palmitoyl_ACP_c = 1.0 Acyl_carrier_protein_c + 1.0 1_hexadecanoyl_sn_glycerol_3_phosphate_c
rxn08548	0.171339	1.0 sn_Glycerol_3_phosphate_c + 1.0 Tetradecenoyl_ACP_c = 1.0 1_tetradec_7_enoyl_sn_glycerol_3_phosphate_c + 1.0 Acyl_carrier_protein_c
rxn08547	0.171339	1.0 sn_Glycerol_3_phosphate_c + 1.0 Tetradecanoyl__acp__c = 1.0 Acyl_carrier_protein_c + 1.0 1_tetradecanoyl_sn_glycerol_3_phosphate_c
rxn08546	0.171339	1.0 sn_Glycerol_3_phosphate_c + 1.0 Dodecanoyl__acyl_carrier_protein__c = 1.0 Acyl_carrier_protein_c + 1.0 1_dodecanoyl_sn_glycerol_3_phosphate_c
rxn00262	0.169199	1.0 H2O_c + 1.0 L_Aspartate_c + 1.0 Oxygen_c = 1.0 H2O2_c + 1.0 NH3_c + 1.0 Oxaloacetate_c
rxn08557	0.168917	1.0 sn_Glycerol_3_phosphate_c + 1.0 Menaquinone_8_c = 1.0 Glycerone_phosphate_c + 1.0 Menaquinol_8_c
rxn09997	0.166393	1.0 H2O_c + 1.0 Aminoimidazole_ribotide_c = 1.0 Glycolaldehyde_c + 2.0 H__c + 1.0 Orthophosphate_c + 0.5 Oxygen_c + 1.0 4_Amino_5_hydroxymethyl_2_methylpyrimidine_c
rxn00584	0.166053	1.0 NAD__c + 1.0 1_6_Dihydroxy_cis_2_4_cyclohexadiene_1_carboxylic_acid_c = 1.0 NADH_c + 1.0 CO2_c + 1.0 Catechol_c
t_cpd00036	0.164681	1.0 Succinate_e + 1.0 H__e = 1.0 Succinate_c + 1.0 H__c
rxn03394	0.162023	1.0 2_Octaprenylphenol_c + 1.0 NADPH_c + 1.0 Oxygen_c + 1.0 H__c = 1.0 H2O_c + 1.0 2_Octaprenyl_6_hydroxyphenol_c + 1.0 NADP__c
rxn01518	0.16083	1.0 Deoxyuridine_c + 1.0 ATP_c = 1.0 ADP_c + 1.0 dUMP_c
rxn10237	0.159992	2.0 H__c + 1.0 Diisohexadecanoylphosphatidylserine_c = 1.0 CO2_c + 1.0 Diisohexadecanoylphosphatidylethanolamine_c
rxn10236	0.159992	2.0 H__c + 1.0 Dianteisopentadecanoylphosphatidylserine_c = 1.0 CO2_c + 1.0 Dianteisopentadecanoylphosphatidylethanolamine_c
rxn10235	0.159992	2.0 H__c + 1.0 Diisopentadecanoylphosphatidylserine_c = 1.0 CO2_c + 1.0 Diisopentadecanoylphosphatidylethanolamine_c
rxn10234	0.159992	2.0 H__c + 1.0 Diisotetradecanoylphosphatidylserine_c = 1.0 CO2_c + 1.0 Diisotetradecanoylphosphatidylethanolamine_c
rxn10233	0.159992	2.0 H__c + 1.0 Dianteisoheptadecanoylphosphatidylserine_c = 1.0 CO2_c + 1.0 Dianteisoheptadecanoylphosphatidylethanolamine_c
rxn10232	0.159992	1.0 Diisoheptadecanoylphosphatidylserine_c + 2.0 H__c = 1.0 Diisoheptadecanoylphosphatidylethanolamine_c + 1.0 CO2_c
rxn10231	0.159992	1.0 CDP_1_2_diisohexadecanoylglycerol_c + 1.0 L_Serine_c = 1.0 H__c + 1.0 Diisohexadecanoylphosphatidylserine_c + 1.0 CMP_c
rxn10230	0.159992	1.0 CDP_1_2_dianteisopentadecanoylglycerol_c + 1.0 L_Serine_c = 1.0 H__c + 1.0 Dianteisopentadecanoylphosphatidylserine_c + 1.0 CMP_c
rxn10229	0.159992	1.0 L_Serine_c + 1.0 CDP_1_2_diisopentadecanoylglycerol_c = 1.0 H__c + 1.0 Diisopentadecanoylphosphatidylserine_c + 1.0 CMP_c
rxn10228	0.159992	1.0 CDP_1_2_diisotetradecanoylglycerol_c + 1.0 L_Serine_c = 1.0 H__c + 1.0 Diisotetradecanoylphosphatidylserine_c + 1.0 CMP_c
rxn10227	0.159992	1.0 CDP_1_2_dianteisoheptadecanoylglycerol_c + 1.0 L_Serine_c = 1.0 H__c + 1.0 Dianteisoheptadecanoylphosphatidylserine_c + 1.0 CMP_c
rxn10226	0.159992	1.0 CDP_1_2_diisoheptadecanoylglycerol_c + 1.0 L_Serine_c = 1.0 Diisoheptadecanoylphosphatidylserine_c + 1.0 H__c + 1.0 CMP_c
rxn09211	0.159992	1.0 CDP_1_2_dioctadec_11_enoylglycerol_c + 1.0 L_Serine_c = 1.0 H__c + 1.0 phosphatidylserine_dioctadec_11_enoyl_c + 1.0 CMP_c
rxn09210	0.159992	1.0 CDP_1_2_dioctadecanoylglycerol_c + 1.0 L_Serine_c = 1.0 H__c + 1.0 phosphatidylserine_dioctadecanoyl_c + 1.0 CMP_c
rxn09209	0.159992	1.0 CDP_1_2_dihexadec_9_enoylglycerol_c + 1.0 L_Serine_c = 1.0 H__c + 1.0 phosphatidylserine_dihexadec_9_enoyl_c + 1.0 CMP_c
rxn09208	0.159992	1.0 CDP_1_2_dihexadecanoylglycerol_c + 1.0 L_Serine_c = 1.0 H__c + 1.0 CMP_c + 1.0 phosphatidylserine_dihexadecanoyl_c
rxn09207	0.159992	1.0 CDP_1_2_ditetradec_7_enoylglycerol_c + 1.0 L_Serine_c = 1.0 H__c + 1.0 phosphatidylserine_ditetradec_7_enoyl_c + 1.0 CMP_c
rxn09206	0.159992	1.0 L_Serine_c + 1.0 CDP_1_2_ditetradecanoylglycerol_c = 1.0 H__c + 1.0 phosphatidylserine_ditetradecanoyl_c + 1.0 CMP_c
rxn09205	0.159992	1.0 CDP_1_2_didodecanoylglycerol_c + 1.0 L_Serine_c = 1.0 H__c + 1.0 phosphatidylserine_didodecanoyl_c + 1.0 CMP_c
rxn09203	0.159992	2.0 H__c + 1.0 phosphatidylserine_dioctadec_11_enoyl_c = 1.0 CO2_c + 1.0 phosphatidylethanolamine_dioctadec_11_enoyl_c
rxn09202	0.159992	2.0 H__c + 1.0 phosphatidylserine_dioctadecanoyl_c = 1.0 CO2_c + 1.0 phosphatidylethanolamine_dioctadecanoyl_c
rxn09201	0.159992	2.0 H__c + 1.0 phosphatidylserine_dihexadec_9_enoyl_c = 1.0 CO2_c + 1.0 phosphatidylethanolamine_dihexadec_9enoyl_c
rxn09200	0.159992	2.0 H__c + 1.0 phosphatidylserine_dihexadecanoyl_c = 1.0 CO2_c + 1.0 phosphatidylethanolamine_dihexadecanoyl_c
rxn09199	0.159992	2.0 H__c + 1.0 phosphatidylserine_ditetradec_7_enoyl_c = 1.0 CO2_c + 1.0 phosphatidylethanolamine_ditetradec_7_enoyl_c
rxn09198	0.159992	2.0 H__c + 1.0 phosphatidylserine_ditetradecanoyl_c = 1.0 CO2_c + 1.0 phosphatidylethanolamine_ditetradecanoyl_c
rxn09197	0.159992	2.0 H__c + 1.0 phosphatidylserine_didodecanoyl_c = 1.0 phosphatidylethanolamine_didodecanoyl_c + 1.0 CO2_c
rxn01406	0.159282	1.0 S_Adenosylmethioninamine_c + 1.0 Putrescine_c = 1.0 H__c + 1.0 Spermidine_c + 1.0 5__Methylthioadenosine_c
rxn00569	0.157823	3.0 NADPH_c + 1.0 Nitrite_c + 5.0 H__c = 2.0 H2O_c + 1.0 NH3_c + 3.0 NADP__c
rxn00361	0.156727	1.0 Adenylyl_sulfate_c + 1.0 ATP_c = 1.0 3__Phosphoadenylyl_sulfate_c + 1.0 ADP_c
t_cpd00051	0.155638	1.0 L_Arginine_e + 1.0 L_Ornithine_c = 1.0 L_Ornithine_e + 1.0 L_Arginine_c
rxn10131	0.155638	1.0 L_Arginine_e + 1.0 L_Ornithine_c = 1.0 L_Ornithine_e + 1.0 L_Arginine_c
rxn01114	0.155313	1.0 ATP_c + 1.0 D_Ribulose_c = 1.0 D_Ribulose_5_phosphate_c + 1.0 ADP_c
rxn00214	0.150279	1.0 UDP_glucose_c = 1.0 UDP_D_galactose_c
rxn00102	0.150279	1.0 H__c + 1.0 HCO3__c = 1.0 H2O_c + 1.0 CO2_c
rxn10204	0.148593	1.0 sn_Glycerol_3_phosphate_c + 1.0 Stearoyl_CoA_c = 1.0 1_octadecanoyl_sn_glycerol_3_phosphate_c + 1.0 CoA_c
rxn01103	0.147706	1.0 H2O_c + 1.0 3_Phospho_D_glyceroyl_phosphate_c = 2.0 H__c + 1.0 Orthophosphate_c + 1.0 3_Phospho_D_glycerate_c
rxn00227	0.147706	1.0 H2O_c + 1.0 Acetyl_phosphate_c = 2.0 H__c + 1.0 Orthophosphate_c + 1.0 Acetate_c
rxn08180	0.147322	1.0 Dethiobiotin_c + 1.0 S_Adenosyl_L_methionine_c + 1.0 Sulfur_c = 1.0 Biotin_c + 1.0 5__Deoxyadenosine_c + 1.0 L_Methionine_c + 1.0 H__c
rxn07295	0.145211	1.0 Glycine_c = 3.0 H__c + 1.0 Iminoglycine_c
rxn10168	0.145129	1.0 H2O_c + 1.0 Potassium_e + 1.0 ATP_c = 1.0 H__c + 1.0 Orthophosphate_c + 1.0 Potassium_c + 1.0 ADP_c
rxn04082	0.140395	1.0 L_Ribulose_5_phosphate_c = 1.0 D_Xylulose_5_phosphate_c
rxn01763	0.140395	1.0 L_Ribulose_c + 1.0 ATP_c = 1.0 L_Ribulose_5_phosphate_c + 1.0 ADP_c
rxn00727	0.140291	1.0 L_Glutamine_c + 1.0 Chorismate_c = 1.0 Pyruvate_c + 1.0 H__c + 1.0 L_Glutamate_c + 1.0 Anthranilate_c
rxn00134	0.139055	1.0 ATP_c + 1.0 Adenosine_c = 1.0 AMP_c + 1.0 ADP_c
rxn00416	0.139032	1.0 L_Glutamine_c + 1.0 H2O_c + 1.0 L_Aspartate_c + 1.0 ATP_c = 1.0 L_Glutamate_c + 1.0 Diphosphate_c + 1.0 L_Asparagine_c + 1.0 AMP_c
t_cpd01242	0.138978	1.0 H2O_c + 1.0 ATP_c + 1.0 Deoxyribose_e = 1.0 Deoxyribose_c + 1.0 H__c + 1.0 Orthophosphate_c + 1.0 ADP_c
t_cpd00105	0.138978	1.0 H2O_c + 1.0 ATP_c + 1.0 D_Ribose_e = 1.0 D_Ribose_c + 1.0 Orthophosphate_c + 1.0 ADP_c + 1.0 H__c
rxn05549	0.138978	1.0 H2O_c + 1.0 ATP_c + 1.0 Deoxyribose_e = 1.0 Deoxyribose_c + 1.0 H__c + 1.0 Orthophosphate_c + 1.0 ADP_c
rxn05160	0.138978	1.0 H2O_c + 1.0 ATP_c + 1.0 D_Ribose_e = 1.0 D_Ribose_c + 1.0 Orthophosphate_c + 1.0 ADP_c + 1.0 H__c
rxn00980	0.138739	1.0 2_Phosphoglycolate_c + 1.0 H2O_c = 1.0 Glycolate_c + 1.0 Orthophosphate_c + 1.0 H__c
t_cpd00104	0.136461	1.0 H2O_c + 1.0 ATP_c + 1.0 Biotin_e = 1.0 Biotin_c + 1.0 Orthophosphate_c + 1.0 ADP_c + 1.0 H__c
rxn05223	0.136461	1.0 H2O_c + 1.0 ATP_c + 1.0 Biotin_e = 1.0 Biotin_c + 1.0 Orthophosphate_c + 1.0 ADP_c + 1.0 H__c
rxn00248	0.135486	1.0 NAD__c + 1.0 _S__Malate_c = 1.0 H__c + 1.0 NADH_c + 1.0 Oxaloacetate_c
rxn00867	0.133912	1.0 L_Histidine_c = 1.0 Urocanate_c + 1.0 NH3_c
rxn05625	0.133601	1.0 Nitrite_e + 1.0 H__e = 1.0 H__c + 1.0 Nitrite_c
rxn01093	0.132907	1.0 H__c + 1.0 2_3_Dihydroxybenzoate_c + 1.0 ATP_c = 1.0 _2_3_Dihydroxybenzoyl_adenylate_c + 1.0 Diphosphate_c
rxn01204	0.132793	1.0 2_Oxoglutarate_c + 1.0 4_Aminobutanoate_c = 1.0 L_Glutamate_c + 1.0 Succinate_semialdehyde_c
rxn00223	0.132232	1.0 D_Glucose_c = 1.0 D_Fructose_c
rxn05031	0.129383	1.0 Prephytoene_diphosphate_c = 1.0 Diphosphate_c + 1.0 Phytoene_c
rxn02945	0.129383	1.0 Prephytoene_diphosphate_c = 1.0 15_cis_Phytoene_c + 1.0 Diphosphate_c
rxn01489	0.129383	2.0 Geranylgeranyl_diphosphate_c = 1.0 Prephytoene_diphosphate_c + 1.0 Diphosphate_c
t_cpd00106	0.129272	1.0 Fumarate_e + 1.0 H__e = 1.0 H__c + 1.0 Fumarate_c
rxn00540	0.129091	1.0 Pyruvate_c + 1.0 Acetaldehyde_c = 1.0 4_Hydroxy_2_oxopentanoate_c
rxn00289	0.127231	1.0 _2S_3R__3_Hydroxybutane_1_2_3_tricarboxylate_c = 1.0 Pyruvate_c + 1.0 Succinate_c
rxn05305	0.126623	1.0 L_Lysine_c + 1.0 H__e = 1.0 H__c + 1.0 L_Lysine_e
rxn06777	0.126228	1.0 NAD__c + 1.0 _S__3_Hydroxytetradecanoyl_CoA_c = 1.0 H__c + 1.0 NADH_c + 1.0 3_Oxotetradecanoyl_CoA_c
rxn06510	0.126228	1.0 Acetyl_CoA_c + 1.0 Lauroyl_CoA_c = 1.0 CoA_c + 1.0 3_Oxotetradecanoyl_CoA_c
rxn04750	0.126228	1.0 NAD__c + 1.0 _3S__3_Hydroxyadipyl_CoA_c = 1.0 3_Oxoadipyl_CoA_c + 1.0 H__c + 1.0 NADH_c
rxn03250	0.126228	1.0 _S__Hydroxyhexanoyl_CoA_c = 1.0 H2O_c + 1.0 trans_Hex_2_enoyl_CoA_c
rxn03249	0.126228	1.0 _S__Hydroxyhexanoyl_CoA_c + 1.0 NAD__c = 1.0 H__c + 1.0 3_Oxohexanoyl_CoA_c + 1.0 NADH_c
rxn03248	0.126228	1.0 Acetyl_CoA_c + 1.0 Hexanoyl_CoA_c = 1.0 3_Oxooctanoyl_CoA_c + 1.0 CoA_c
rxn03247	0.126228	1.0 _S__Hydroxyoctanoyl_CoA_c = 1.0 H2O_c + 1.0 trans_Oct_2_enoyl_CoA_c
rxn03246	0.126228	1.0 NAD__c + 1.0 _S__Hydroxyoctanoyl_CoA_c = 1.0 3_Oxooctanoyl_CoA_c + 1.0 H__c + 1.0 NADH_c
rxn03245	0.126228	1.0 _S__Hydroxydecanoyl_CoA_c = 1.0 H2O_c + 1.0 trans_Dec_2_enoyl_CoA_c
rxn03244	0.126228	1.0 NAD__c + 1.0 _S__Hydroxydecanoyl_CoA_c = 1.0 H__c + 1.0 3_Oxodecanoyl_CoA_c + 1.0 NADH_c
rxn03243	0.126228	1.0 Decanoyl_CoA_c + 1.0 Acetyl_CoA_c = 1.0 3_Oxododecanoyl_CoA_c + 1.0 CoA_c
rxn03242	0.126228	1.0 NAD__c + 1.0 _S__3_Hydroxydodecanoyl_CoA_c = 1.0 H__c + 1.0 NADH_c + 1.0 3_Oxododecanoyl_CoA_c
rxn03241	0.126228	1.0 _S__3_Hydroxytetradecanoyl_CoA_c = 1.0 trans_Tetradec_2_enoyl_CoA_c + 1.0 H2O_c
rxn03240	0.126228	1.0 _S__3_Hydroxyhexadecanoyl_CoA_c = 1.0 H2O_c + 1.0 trans_Hexadec_2_enoyl_CoA_c
rxn03239	0.126228	1.0 NAD__c + 1.0 _S__3_Hydroxyhexadecanoyl_CoA_c = 1.0 H__c + 1.0 NADH_c + 1.0 3_Oxopalmitoyl_CoA_c
rxn02949	0.126228	1.0 2_Methylprop_2_enoyl_CoA_c + 1.0 H2O_c = 1.0 _S__3_Hydroxyisobutyryl_CoA_c
rxn02934	0.126228	1.0 _2S_3S__3_Hydroxy_2_methylbutanoyl_CoA_c = 1.0 H2O_c + 1.0 2_Methylbut_2_enoyl_CoA_c
rxn02933	0.126228	1.0 NAD__c + 1.0 _2S_3S__3_Hydroxy_2_methylbutanoyl_CoA_c = 1.0 H__c + 1.0 NADH_c + 1.0 2_Methylacetoacetyl_CoA_c
rxn02911	0.126228	1.0 _S__3_Hydroxydodecanoyl_CoA_c = 1.0 H2O_c + 1.0 2_trans_Dodecenoyl_CoA_c
rxn02804	0.126228	1.0 Tetradecanoyl_CoA_c + 1.0 Acetyl_CoA_c = 1.0 CoA_c + 1.0 3_Oxopalmitoyl_CoA_c
rxn02680	0.126228	1.0 Octanoyl_CoA_c + 1.0 Acetyl_CoA_c = 1.0 3_Oxodecanoyl_CoA_c + 1.0 CoA_c
rxn02167	0.126228	1.0 _S__3_Hydroxybutanoyl_CoA_c = 1.0 H2O_c + 1.0 Crotonoyl_CoA_c
rxn01480	0.126228	1.0 NAD__c + 1.0 3_Hydroxy_2_methylpropanoate_c = 1.0 2_Methyl_3_oxopropanoate_c + 1.0 H__c + 1.0 NADH_c
rxn00874	0.126228	1.0 Acetyl_CoA_c + 1.0 Butanoyl_CoA_c = 1.0 3_Oxohexanoyl_CoA_c + 1.0 CoA_c
rxn00676	0.126228	1.0 Propanoyl_CoA_c + 1.0 Acetyl_CoA_c = 1.0 2_Methylacetoacetyl_CoA_c + 1.0 CoA_c
rxn05236	0.126228	1.0 UTP_c + 1.0 trdrd_c = 1.0 H2O_c + 1.0 trdox_c + 1.0 dUTP_c
rxn00175	0.124632	1.0 H__c + 1.0 CoA_c + 1.0 ATP_c + 1.0 Acetate_c = 1.0 Diphosphate_c + 1.0 Acetyl_CoA_c + 1.0 AMP_c
rxn00269	0.12445	1.0 H2O_c + 1.0 Oxygen_c + 1.0 Glycine_c = 1.0 H2O2_c + 1.0 NH3_c + 1.0 Glyoxylate_c
rxn03898	0.123949	1.0 H__c + 1.0 NADPH_c + 1.0 Benzoate_c + 1.0 Oxygen_c = 1.0 1_6_Dihydroxy_cis_2_4_cyclohexadiene_1_carboxylic_acid_c + 1.0 NADP__c
rxn03897	0.123949	1.0 H__c + 1.0 NADH_c + 1.0 Oxygen_c + 1.0 Benzoate_c = 1.0 NAD__c + 1.0 1_6_Dihydroxy_cis_2_4_cyclohexadiene_1_carboxylic_acid_c
rxn04143	0.123328	1.0 NAD__c + 1.0 _R_R__Tartaric_acid_c = 1.0 2_Hydroxy_3_oxosuccinate_c + 1.0 H__c + 1.0 NADH_c
rxn01847	0.123328	1.0 NAD__c + 1.0 meso_Tartaric_acid_c = 1.0 2_Hydroxy_3_oxosuccinate_c + 1.0 H__c + 1.0 NADH_c
rxn01285	0.123328	1.0 H__c + 1.0 _R_R__Tartaric_acid_c = 1.0 D_Glycerate_c + 1.0 CO2_c
rxn00160	0.123328	1.0 NAD__c + 1.0 _R__Malate_c = 1.0 Pyruvate_c + 1.0 CO2_c + 1.0 NADH_c
rxn01022	0.123285	1.0 H__c + 1.0 Orthophosphate_c + 1.0 5__Methylthioadenosine_c = 1.0 Adenine_c + 1.0 S_Methyl_5_thio_D_ribose_1_phosphate_c
rxn00740	0.121495	1.0 H2O_c + 1.0 O_Succinyl_L_homoserine_c = 1.0 Succinate_c + 1.0 H__c + 1.0 NH3_c + 1.0 2_Oxobutanoate_c
rxn06078	0.12018	1.0 O_Acetyl_L_homoserine_c + 1.0 Thiosulfate_c + 1.0 trdrd_c = 1.0 Sulfite_c + 1.0 trdox_c + 1.0 L_Homocysteine_c + 1.0 Acetate_c
rxn07589	0.119279	1.0 Cobalt_precorrin_7_c + 1.0 S_Adenosyl_L_methionine_c = 1.0 CO2_c + 1.0 S_Adenosyl_L_homocysteine_c + 1.0 Cobalt_precorrin_8_c
rxn07588	0.119279	1.0 S_Adenosyl_L_methionine_c + 1.0 Cobalt_dihydro_precorrin_6_c = 1.0 Cobalt_precorrin_7_c + 1.0 H__c + 1.0 S_Adenosyl_L_homocysteine_c
rxn03491	0.119279	1.0 Precorrin_6Y_c + 2.0 S_Adenosyl_L_methionine_c = 2.0 H__c + 1.0 CO2_c + 1.0 Precorrin_8X_c + 2.0 S_Adenosyl_L_homocysteine_c
rxn05235	0.117673	1.0 CTP_c + 1.0 trdrd_c = 1.0 H2O_c + 1.0 trdox_c + 1.0 dCTP_c
rxn05234	0.117673	1.0 GTP_c + 1.0 trdrd_c = 1.0 H2O_c + 1.0 dGTP_c + 1.0 trdox_c
rxn05232	0.117673	1.0 trdrd_c + 1.0 ATP_c = 1.0 dATP_c + 1.0 H2O_c + 1.0 trdox_c
rxn08291	0.115354	1.0 D_Alanine_c + 1.0 H2O_c + 1.0 FAD_c = 1.0 Pyruvate_c + 1.0 FADH2_c + 1.0 NH3_c
rxn02782	0.114162	1.0 2_5_Dihydro_5_oxofuran_2_acetate_c = 1.0 H__c + 1.0 cis_cis_Muconate_c
rxn00395	0.113885	1.0 H2O_c + 1.0 L_Arginine_c = 1.0 L_Citrulline_c + 1.0 NH3_c
rxn01274	0.113883	1.0 H2O_c + 1.0 _R__S_Lactoylglutathione_c = 1.0 H__c + 1.0 Glutathione_c + 1.0 _R__Lactate_c
rxn08558	0.11287	1.0 sn_Glycerol_3_phosphate_c + 1.0 2_Demethylmenaquinone_8_c = 1.0 Glycerone_phosphate_c + 1.0 2_Demethylmenaquinol_8_c
rxn00742	0.112116	1.0 H2O_c + 1.0 Cystathionine_c = 1.0 NH3_c + 1.0 2_Oxobutanoate_c + 1.0 L_Cysteine_c
rxn00566	0.112116	1.0 H2O_c + 1.0 L_Cysteine_c = 1.0 Pyruvate_c + 1.0 Hydrogen_sulfide_c + 1.0 NH3_c
rxn05644	0.110331	1.0 D_Ribose_c + 1.0 H2O_c + 1.0 ATP_c = 1.0 H__c + 1.0 Orthophosphate_c + 1.0 ADP_c + 1.0 D_Ribose_e
rxn01192	0.110187	1.0 3_4_Dihydroxybenzoate_c + 1.0 Oxygen_c = 2.0 H__c + 1.0 3_Carboxy_cis_cis_muconate_c
rxn01451	0.108337	1.0 NAD__c + 1.0 _S__3_Hydroxybutanoyl_CoA_c = 1.0 H__c + 1.0 NADH_c + 1.0 Acetoacetyl_CoA_c
rxn00333	0.108308	1.0 Glycolate_c + 1.0 Oxygen_c = 1.0 H2O2_c + 1.0 Glyoxylate_c
rxn02897	0.106256	1.0 Nicotinate_D_ribonucleotide_c + 1.0 Dimethylbenzimidazole_c = 1.0 Nicotinate_c + 1.0 N1__5_Phospho_alpha_D_ribosyl__5_6_dimethylbenzimidazole_c + 1.0 H__c
t_cpd00264	0.105463	1.0 H2O_c + 1.0 Spermidine_e + 1.0 ATP_c = 1.0 H__c + 1.0 Orthophosphate_c + 1.0 Spermidine_c + 1.0 ADP_c
rxn05733	0.104935	1.0 O_Acetyl_L_serine_c + 1.0 Thiosulfate_c + 1.0 trdrd_c = 1.0 Sulfite_c + 1.0 trdox_c + 1.0 L_Cysteine_c + 1.0 Acetate_c
rxn00290	0.10417	1.0 Succinyl_CoA_c + 1.0 Acetoacetate_c = 1.0 Succinate_c + 1.0 Acetoacetyl_CoA_c
rxn05605	0.103954	1.0 _S__Malate_e + 1.0 H__e = 1.0 H__c + 1.0 _S__Malate_c
rxn02369	0.103407	1.0 2_Carboxy_2_5_dihydro_5_oxofuran_2_acetate_c = 1.0 H__c + 1.0 3_Carboxy_cis_cis_muconate_c
rxn05177	0.103061	1.0 H2O_c + 1.0 Thiamine_e + 1.0 ATP_c = 1.0 H__c + 1.0 Orthophosphate_c + 1.0 Thiamine_c + 1.0 ADP_c
rxn00629	0.102858	1.0 NAD__c + 1.0 Mannitol_c = 1.0 H__c + 1.0 NADH_c + 1.0 D_Fructose_c
rxn00808	0.102305	1.0 D_Galactose_c + 1.0 ATP_c = 1.0 alpha_D_Galactose_1_phosphate_c + 1.0 ADP_c
rxn00433	0.102234	1.0 H2O_c + 1.0 Oxygen_c + 1.0 Sarcosine_c = 1.0 Formaldehyde_c + 1.0 H2O2_c + 1.0 Glycine_c
rxn10120	0.101579	2.0 H__c + 1.0 Nitrate_c + 1.0 Ubiquinol_8_c = 1.0 H2O_c + 1.0 Nitrite_c + 1.0 Ubiquinone_8_c + 2.0 H__e
rxn05063	0.101454	1.0 H2O_c + 1.0 Cyanate_c = 1.0 Carbamate_c
rxn03052	0.101149	1.0 5_Methyltetrahydropteroyltri_L_glutamate_c + 1.0 L_Homocysteine_c = 1.0 Tetrahydropteroyltri_L_glutamate_c + 1.0 L_Methionine_c
rxn01506	0.100605	1.0 N_Acetyl_D_glucosamine_6_phosphate_c = 1.0 N_Acetyl_D_mannosamine_6_phosphate_c
t_cpd00393	0.10057	1.0 Folate_e + 1.0 H__e = 1.0 H__c + 1.0 Folate_c
rxn10121	0.0999927	2.0 H__c + 1.0 Nitrate_c + 1.0 Menaquinol_8_c = 1.0 H2O_c + 1.0 Nitrite_c + 1.0 Menaquinone_8_c + 2.0 H__e
rxn03917	0.0995699	1.0 Sedoheptulose_7_phosphate_c = 1.0 D_glycero_D_manno_Heptose_7_phosphate_c
rxn10119	0.0989009	1.0 Hydrogen_c + 2.0 H__c + 1.0 Menaquinone_8_c = 1.0 Menaquinol_8_c + 2.0 H__e
rxn10117	0.0989009	1.0 Hydrogen_c + 2.0 H__c + 1.0 2_Demethylmenaquinone_8_c = 1.0 2_Demethylmenaquinol_8_c + 2.0 H__e
rxn10122	0.0982047	4.5 H__c + 1.0 NADH_c + 1.0 Ubiquinone_8_c = 1.0 NAD__c + 1.0 Ubiquinol_8_c + 3.5 H__e
rxn05937	0.0972136	1.0 H__c + 1.0 Reduced_ferredoxin_c + 1.0 NADP__c = 1.0 NADPH_c + 1.0 Oxidized_ferredoxin_c
rxn03538	0.0967794	1.0 alpha_Ribazole_c + 1.0 Adenosine_GDP_cobinamide_c = 1.0 GMP_c + 1.0 Cobamide_coenzyme_c
rxn10824	0.0963818	1.0 L_Ornithine_e = 1.0 L_Ornithine_c
rxn01620	0.0963818	1.0 L_Fuculose_1_phosphate_c = 1.0 Glycerone_phosphate_c + 1.0 _S__Lactaldehyde_c
rxn03483	0.0950741	1.0 2__3__Cyclic_GMP_c + 1.0 H2O_c = 1.0 Guanosine_3__phosphate_c
rxn02762	0.0950741	1.0 H2O_c + 1.0 2__3__Cyclic_CMP_c = 1.0 3__CMP_c
rxn02522	0.0950741	1.0 H2O_c + 1.0 2__3__Cyclic_UMP_c = 1.0 3__UMP_c
rxn02521	0.0950741	1.0 H2O_c + 1.0 2__3__Cyclic_AMP_c = 1.0 3__AMP_c
rxn05166	0.0949114	1.0 Cobalt_e + 1.0 H2O_c + 1.0 ATP_c = 1.0 H__c + 1.0 Orthophosphate_c + 1.0 ADP_c + 1.0 Cobalt_c
rxn00340	0.094509	1.0 L_Aspartate_c + 1.0 ATP_c + 1.0 NH3_c = 1.0 Diphosphate_c + 1.0 AMP_c + 1.0 L_Asparagine_c
t_cpd00653	0.0936981	1.0 H__e + 1.0 D_Galactonate_e = 1.0 H__c + 1.0 D_Galactonate_c
rxn10160	0.0936981	1.0 H__e + 1.0 D_Galactonate_e = 1.0 H__c + 1.0 D_Galactonate_c
rxn10474	0.0936966	1.0 Cobalt_e = 1.0 Cobalt_c
t_cpd00209	0.0924535	1.0 Nitrate_e + 1.0 H__e = 1.0 H__c + 1.0 Nitrate_c
t_cpd00075	0.0924535	1.0 Nitrite_e + 1.0 H__e = 1.0 H__c + 1.0 Nitrite_c
rxn05627	0.0924535	1.0 Nitrate_e + 1.0 H__e = 1.0 H__c + 1.0 Nitrate_c
rxn05442	0.0923069	1.0 H__c + 1.0 11_methyl_trans_dodec_2_enoyl_ACP_c + 1.0 NADH_c = 1.0 NAD__c + 1.0 11_methyl_dodecanoyl_ACP_c
rxn01299	0.0922129	1.0 H2O_c + 1.0 Inosine_c = 1.0 D_Ribose_c + 1.0 Hypoxanthine_c
rxn00649	0.0911823	1.0 Hydrogen_sulfide_c + 1.0 O_Acetyl_L_serine_c = 1.0 H__c + 1.0 L_Cysteine_c + 1.0 Acetate_c
rxn02003	0.0909314	1.0 dTDP_6_deoxy_L_mannose_c + 1.0 NADP__c = 1.0 H__c + 1.0 dTDP_4_dehydro_6_deoxy_L_mannose_c + 1.0 NADPH_c
rxn00640	0.0908965	1.0 D_Mannose_1_phosphate_c + 1.0 GDP_c = 1.0 GDP_mannose_c + 1.0 H__c + 1.0 Orthophosphate_c
rxn02270	0.0903053	1.0 2_Methylbutanoyl_CoA_c + 1.0 FAD_c = 1.0 FADH2_c + 1.0 2_Methylbut_2_enoyl_CoA_c
rxn04603	0.0889405	1.0 trans_2_3_Dihydroxycinnamate_c + 1.0 Oxygen_c = 1.0 2_Hydroxy_6_ketononatrienedioate_c + 1.0 H__c
rxn03038	0.0889405	1.0 3__2_3_Dihydroxyphenyl_propanoate_c + 1.0 Oxygen_c = 1.0 2_Hydroxy_6_oxonona_2_4_diene_1_9_dioate_c + 1.0 H__c
rxn05433	0.0888405	1.0 4_methyl_trans_hex_2_enoyl_ACP_c + 1.0 NADH_c + 1.0 H__c = 1.0 NAD__c + 1.0 4_methyl_hexanoyl_ACP_c
rxn00544	0.0886917	1.0 Thiamin_diphosphate_c + 1.0 Acetaldehyde_c = 1.0 2__alpha_Hydroxyethyl_thiamine_diphosphate_c
rxn11946	0.0881352	1.0 S_Adenosyl_L_methionine_c + 1.0 2_Octaprenyl_3_methyl_5_hydroxy_6_methoxy_1_4_benzoquinone_c = 1.0 S_Adenosyl_L_homocysteine_c + 1.0 Ubiquinone_8_c
rxn03395	0.0881352	1.0 S_Adenosyl_L_methionine_c + 1.0 2_Octaprenyl_6_hydroxyphenol_c = 1.0 H__c + 1.0 2_Octaprenyl_6_methoxyphenol_c + 1.0 S_Adenosyl_L_homocysteine_c
t_cpd00244	0.0879984	1.0 H2O_c + 1.0 ATP_c + 1.0 Nickel_e = 1.0 Nickel_c + 1.0 H__c + 1.0 Orthophosphate_c + 1.0 ADP_c
rxn05174	0.0879984	1.0 H2O_c + 1.0 ATP_c + 1.0 Nickel_e = 1.0 Nickel_c + 1.0 H__c + 1.0 Orthophosphate_c + 1.0 ADP_c
t_cpd00322	0.0875382	1.0 H2O_c + 1.0 L_Isoleucine_e + 1.0 ATP_c = 1.0 H__c + 1.0 Orthophosphate_c + 1.0 L_Isoleucine_c + 1.0 ADP_c
t_cpd00156	0.0875382	1.0 H2O_c + 1.0 L_Valine_e + 1.0 ATP_c = 1.0 H__c + 1.0 Orthophosphate_c + 1.0 L_Valine_c + 1.0 ADP_c
t_cpd00107	0.0875382	1.0 H2O_c + 1.0 ATP_c + 1.0 L_Leucine_e = 1.0 H__c + 1.0 Orthophosphate_c + 1.0 ADP_c + 1.0 L_Leucine_c
rxn01816	0.0869935	1.0 Succinate_c + 1.0 H__c + 1.0 Cystathionine_c = 1.0 L_Cysteine_c + 1.0 O_Succinyl_L_homoserine_c
rxn05957	0.0867846	1.0 Hydrogen_sulfide_c + 1.0 O_Succinyl_L_homoserine_c = 1.0 Succinate_c + 1.0 H__c + 1.0 L_Homocysteine_c
rxn10067	0.0867712	1.0 flavin_mononucleotide_reduced_c + 1.0 hexanesulfonate_c + 1.0 Oxygen_c = 1.0 Sulfite_c + 1.0 H2O_c + 1.0 FMN_c + 1.0 hexanal_c
rxn08471	0.0867712	1.0 flavin_mononucleotide_reduced_c + 1.0 Oxygen_c + 1.0 Sulfoacetate_c = 1.0 Sulfite_c + 1.0 H2O_c + 1.0 FMN_c + 1.0 Glyoxylate_c
rxn08470	0.0867712	1.0 flavin_mononucleotide_reduced_c + 1.0 Oxygen_c + 1.0 butanesulfonate_c = 1.0 Butanal_c + 1.0 Sulfite_c + 1.0 H2O_c + 1.0 FMN_c
rxn08469	0.0867712	1.0 flavin_mononucleotide_reduced_c + 1.0 ethanesulfonate_c + 1.0 Oxygen_c = 1.0 Sulfite_c + 1.0 H2O_c + 1.0 FMN_c + 1.0 Acetaldehyde_c
rxn08468	0.0867712	1.0 flavin_mononucleotide_reduced_c + 1.0 Methanesulfonic_acid_c + 1.0 Oxygen_c = 1.0 Formaldehyde_c + 1.0 Sulfite_c + 1.0 H2O_c + 1.0 FMN_c
rxn08467	0.0867712	1.0 flavin_mononucleotide_reduced_c + 1.0 2_Hydroxyethanesulfonate_c + 1.0 Oxygen_c = 1.0 Glycolaldehyde_c + 1.0 Sulfite_c + 1.0 H2O_c + 1.0 FMN_c
rxn05737	0.0867712	1.0 flavin_mononucleotide_reduced_c + 1.0 Taurine_c + 1.0 Oxygen_c = 1.0 Sulfite_c + 1.0 H2O_c + 1.0 FMN_c + 1.0 Aminoacetaldehyde_c
rxn00347	0.0867107	1.0 L_Aspartate_c = 1.0 Fumarate_c + 1.0 NH3_c
rxn02866	0.0859625	1.0 3_Methylbutanoyl_CoA_c + 1.0 FAD_c = 1.0 FADH2_c + 1.0 3_Methylcrotonyl_CoA_c
rxn00991	0.0859625	1.0 _S__3_Hydroxy_3_methylglutaryl_CoA_c = 1.0 Acetoacetate_c + 1.0 Acetyl_CoA_c
rxn05735	0.0853784	1.0 NAD__c + 1.0 H2O_c + 1.0 Aminoacetaldehyde_c = 2.0 H__c + 1.0 NADH_c + 1.0 Glycine_c
rxn05734	0.0853784	1.0 NAD__c + 1.0 H2O_c + 1.0 Glyoxylate_c = 1.0 Oxalate_c + 1.0 NADH_c + 2.0 H__c
rxn02853	0.0853784	1.0 NAD__c + 1.0 H2O_c + 1.0 Imidazole_4_acetaldehyde_c = 1.0 Imidazole_4_acetate_c + 2.0 H__c + 1.0 NADH_c
rxn01459	0.0853784	1.0 H2O_c + 1.0 NADP__c + 1.0 4_Aminobutyraldehyde_c = 1.0 4_Aminobutanoate_c + 1.0 NADPH_c + 2.0 H__c
rxn01286	0.0853784	1.0 NAD__c + 1.0 D_Glyceraldehyde_c + 1.0 H2O_c = 2.0 H__c + 1.0 D_Glycerate_c + 1.0 NADH_c
rxn00506	0.0853784	1.0 NAD__c + 1.0 H2O_c + 1.0 Acetaldehyde_c = 2.0 H__c + 1.0 NADH_c + 1.0 Acetate_c
rxn02312	0.0844235	1.0 S_Adenosyl_L_methionine_c + 1.0 8_Amino_7_oxononanoate_c = 1.0 S_Adenosyl_4_methylthio_2_oxobutanoate_c + 1.0 7_8_Diaminononanoate_c
rxn01123	0.0838927	1.0 2_Dehydro_3_deoxy_D_gluconate_c + 1.0 ATP_c = 1.0 2_Dehydro_3_deoxy_6_phospho_D_gluconate_c + 1.0 ADP_c
t_cpd00027	0.0838531	1.0 H2O_c + 1.0 D_Glucose_e + 1.0 ATP_c = 1.0 H__c + 1.0 Orthophosphate_c + 1.0 D_Glucose_c + 1.0 ADP_c
rxn05054	0.083445	1.0 Adenosyl_cobyrinate_hexaamide_c + 1.0 _R__1_Aminopropan_2_ol_c + 1.0 ATP_c = 1.0 H__c + 1.0 Orthophosphate_c + 1.0 Adenosyl_cobinamide_c + 1.0 ADP_c
rxn04384	0.083445	1.0 D_1_Aminopropan_2_ol_O_phosphate_c + 1.0 Adenosyl_cobyrinate_hexaamide_c + 1.0 ATP_c = 2.0 H__c + 1.0 Orthophosphate_c + 1.0 Adenosyl_cobinamide_phosphate_c + 1.0 ADP_c
rxn03540	0.083445	4.0 L_Glutamine_c + 4.0 H2O_c + 4.0 ATP_c + 1.0 Adenosyl_cobyrinate_a_c_diamide_c = 4.0 H__c + 4.0 Orthophosphate_c + 1.0 Adenosyl_cobyrinate_hexaamide_c + 4.0 L_Glutamate_c + 4.0 ADP_c
rxn02277	0.083427	1.0 CO2_c + 1.0 7_8_Diaminononanoate_c + 1.0 ATP_c = 3.0 H__c + 1.0 Orthophosphate_c + 1.0 Dethiobiotin_c + 1.0 ADP_c
rxn05201	0.0827235	1.0 Hypoxanthine_e + 1.0 H__e = 1.0 H__c + 1.0 Hypoxanthine_c
t_cpd00226	0.0827235	1.0 Hypoxanthine_e + 1.0 H__e = 1.0 H__c + 1.0 Hypoxanthine_c
rxn00986	0.0826807	1.0 Diphosphate_c + 1.0 Propinol_adenylate_c = 1.0 Propanoate_c + 1.0 ATP_c + 1.0 H__c
rxn00675	0.0826807	1.0 CoA_c + 1.0 Propinol_adenylate_c = 1.0 Propanoyl_CoA_c + 1.0 AMP_c
rxn05155	0.081189	1.0 H2O_c + 1.0 L_Glutamine_e + 1.0 ATP_c = 1.0 L_Glutamine_c + 1.0 H__c + 1.0 Orthophosphate_c + 1.0 ADP_c
t_cpd00053	0.081189	1.0 H2O_c + 1.0 L_Glutamine_e + 1.0 ATP_c = 1.0 L_Glutamine_c + 1.0 H__c + 1.0 Orthophosphate_c + 1.0 ADP_c
rxn01545	0.0809945	1.0 H2O_c + 1.0 Xanthosine_c = 1.0 Xanthine_c + 1.0 D_Ribose_c
rxn01226	0.0806063	1.0 H2O_c + 1.0 Guanosine_c = 1.0 D_Ribose_c + 1.0 Guanine_c
rxn00927	0.0806063	1.0 H2O_c + 1.0 Adenosine_c = 1.0 D_Ribose_c + 1.0 Adenine_c
rxn00473	0.0801631	1.0 L_Tryptophan_c + 1.0 H2O_c = 1.0 Pyruvate_c + 1.0 Indole_c + 1.0 NH3_c
rxn00114	0.0801631	1.0 H__c + 1.0 ADP_c + 1.0 Carbamoyl_phosphate_c = 1.0 CO2_c + 1.0 ATP_c + 1.0 NH3_c
rxn01997	0.0801631	1.0 dTDP_glucose_c = 1.0 H2O_c + 1.0 4_6_Dideoxy_4_oxo_dTDP_D_glucose_c
rxn02363	0.0798239	1.0 H__c + 1.0 3_Hydroxyphenylacetate_c + 1.0 NADH_c + 1.0 Oxygen_c = 1.0 3_4_Dihydroxyphenylacetate_c + 1.0 NAD__c + 1.0 H2O_c
rxn01945	0.0798239	1.0 H__c + 1.0 NADH_c + 1.0 Oxygen_c + 1.0 4_Hydroxyphenylacetate_c = 1.0 3_4_Dihydroxyphenylacetate_c + 1.0 NAD__c + 1.0 H2O_c
rxn00105	0.078681	1.0 Nicotinamide_D_ribonucleotide_c + 1.0 ATP_c = 1.0 NAD__c + 1.0 Diphosphate_c
rxn08205	0.07866	1.0 H2O_c + 1.0 CDP_1_2_dioctadec_11_enoylglycerol_c = 1.0 1_2_dioctadec_11_enoyl_sn_glycerol_3_phosphate_c + 1.0 CMP_c
rxn08204	0.07866	1.0 CDP_1_2_dioctadecanoylglycerol_c + 1.0 H2O_c = 1.0 1_2_dioctadecanoyl_sn_glycerol_3_phosphate_c + 1.0 CMP_c
rxn08203	0.07866	1.0 H2O_c + 1.0 CDP_1_2_dihexadec_9_enoylglycerol_c = 1.0 1_2_dihexadec_9_enoyl_sn_glycerol_3_phosphate_c + 1.0 CMP_c
rxn08202	0.07866	1.0 H2O_c + 1.0 CDP_1_2_dihexadecanoylglycerol_c = 1.0 1_2_dihexadecanoyl_sn_glycerol_3_phosphate_c + 1.0 CMP_c
rxn08201	0.07866	1.0 CDP_1_2_ditetradec_7_enoylglycerol_c + 1.0 H2O_c = 1.0 1_2_ditetradec_7_enoyl_sn_glycerol_3_phosphate_c + 1.0 CMP_c
rxn08200	0.07866	1.0 H2O_c + 1.0 CDP_1_2_ditetradecanoylglycerol_c = 1.0 CMP_c + 1.0 1_2_ditetradecanoyl_sn_glycerol_3_phosphate_c
rxn08199	0.07866	1.0 H2O_c + 1.0 CDP_1_2_didodecanoylglycerol_c = 1.0 CMP_c + 1.0 1_2_didodecanoyl_sn_glycerol_3_phosphate_c
t_cpd00130	0.0778743	1.0 Sodium_e + 1.0 _S__Malate_e = 1.0 _S__Malate_c + 1.0 Sodium_c
rxn05517	0.0774645	1.0 Cadmium_c + 1.0 Potassium_e + 1.0 H__e = 1.0 H__c + 1.0 Potassium_c + 1.0 Cadmium_e
rxn05315	0.0774645	1.0 Potassium_e + 1.0 Zinc_c + 1.0 H__e = 1.0 Zinc_e + 1.0 H__c + 1.0 Potassium_c
rxn01454	0.077423	1.0 H2O_c + 1.0 Acetyl_CoA_c + 1.0 Acetoacetyl_CoA_c = 1.0 H__c + 1.0 CoA_c + 1.0 _S__3_Hydroxy_3_methylglutaryl_CoA_c
rxn01671	0.0768996	1.0 N_Ribosylnicotinamide_c + 1.0 ATP_c = 1.0 Nicotinamide_D_ribonucleotide_c + 1.0 ADP_c
rxn05593	0.0768697	1.0 myo_Inositol_e + 1.0 H__e = 1.0 H__c + 1.0 myo_Inositol_c
t_cpd00644	0.0768697	1.0 Pantothenate_e + 1.0 H__e = 1.0 H__c + 1.0 Pantothenate_c
t_cpd00121	0.0768697	1.0 myo_Inositol_e + 1.0 H__e = 1.0 H__c + 1.0 myo_Inositol_c
rxn09296	0.0768697	1.0 H2O2_c + 1.0 trdrd_c = 2.0 H2O_c + 1.0 trdox_c
rxn00737	0.0768697	1.0 L_Threonine_c = 1.0 NH3_c + 1.0 2_Oxobutanoate_c
rxn04413	0.0766243	1.0 Adenosyl_cobinamide_c + 1.0 GTP_c = 1.0 H__c + 1.0 GDP_c + 1.0 Adenosyl_cobinamide_phosphate_c
rxn03537	0.0766243	1.0 H__c + 1.0 GTP_c + 1.0 Adenosyl_cobinamide_phosphate_c = 1.0 Diphosphate_c + 1.0 Adenosine_GDP_cobinamide_c
rxn03536	0.0766243	1.0 Adenosyl_cobinamide_c + 1.0 ATP_c = 1.0 H__c + 1.0 Adenosyl_cobinamide_phosphate_c + 1.0 ADP_c
rxn00394	0.0761372	1.0 H2O_c + 1.0 L_Arginine_c = 1.0 Urea_c + 1.0 L_Ornithine_c
rxn03990	0.0759592	1.0 NADH_c + 2.0 Oxygen_c + 2.0 Nitric_oxide_c = 1.0 NAD__c + 1.0 H__c + 2.0 Nitrate_c
rxn00588	0.0759429	1.0 Catechol_c + 1.0 Oxygen_c = 2.0 H__c + 1.0 cis_cis_Muconate_c
t_cpd00179	0.0753998	1.0 Maltose_e + 1.0 H2O_c + 1.0 ATP_c = 1.0 H__c + 1.0 Orthophosphate_c + 1.0 ADP_c + 1.0 Maltose_c
rxn05170	0.0753998	1.0 Maltose_e + 1.0 H2O_c + 1.0 ATP_c = 1.0 H__c + 1.0 Orthophosphate_c + 1.0 ADP_c + 1.0 Maltose_c
rxn05119	0.0753337	1.0 NAD__c + 1.0 L_Aspartate_c = 1.0 Iminoaspartate_c + 1.0 NADH_c + 2.0 H__c
rxn03108	0.0753337	1.0 ATP_c + 1.0 4_Amino_2_methyl_5_phosphomethylpyrimidine_c = 1.0 2_Methyl_4_amino_5_hydroxymethylpyrimidine_diphosphate_c + 1.0 ADP_c
rxn02484	0.0753337	1.0 ATP_c + 1.0 4_Amino_5_hydroxymethyl_2_methylpyrimidine_c = 1.0 ADP_c + 1.0 4_Amino_2_methyl_5_phosphomethylpyrimidine_c
rxn00910	0.0753337	1.0 5_Methyltetrahydrofolate_c + 1.0 NADP__c = 1.0 H__c + 1.0 5_10_Methylenetetrahydrofolate_c + 1.0 NADPH_c
rxn06377	0.0749794	1.0 H__c + 1.0 Glycine_c + 1.0 Lipoylprotein_c = 1.0 S_Aminomethyldihydrolipoylprotein_c + 1.0 CO2_c
rxn00552	0.0745874	1.0 H2O_c + 1.0 D_Glucosamine_6_phosphate_c = 1.0 D_Fructose_6_phosphate_c + 1.0 NH3_c
rxn04050	0.0736817	1.0 H__c + 1.0 NADPH_c + 1.0 Cobalt_precorrin_6_c = 1.0 Cobalt_dihydro_precorrin_6_c + 1.0 NADP__c
rxn03492	0.0736817	1.0 Precorrin_6Y_c + 1.0 NADP__c = 1.0 H__c + 1.0 NADPH_c + 1.0 Precorrin_6X_c
rxn01275	0.0735408	1.0 D_Gluconic_acid_c + 1.0 ATP_c = 1.0 6_Phospho_D_gluconate_c + 1.0 ADP_c
rxn02889	0.0734097	1.0 HCO3__c + 1.0 ATP_c + 1.0 3_Methylcrotonyl_CoA_c = 1.0 3_Methylglutaconyl_CoA_c + 1.0 Orthophosphate_c + 1.0 ADP_c + 1.0 H__c
rxn00324	0.0732048	1.0 Glycolate_c + 1.0 NADP__c = 1.0 H__c + 1.0 NADPH_c + 1.0 Glyoxylate_c
rxn00913	0.072569	1.0 H2O_c + 1.0 GMP_c = 1.0 H__c + 1.0 Orthophosphate_c + 1.0 Guanosine_c
rxn02831	0.0724108	1.0 2_Succinylbenzoate_c + 1.0 CoA_c + 1.0 ATP_c + 1.0 H__c = 1.0 2_Succinylbenzoyl_CoA_c + 1.0 Diphosphate_c + 1.0 AMP_c
rxn00292	0.0721754	1.0 H2O_c + 1.0 UDP_N_acetyl_D_glucosamine_c = 1.0 UDP_c + 1.0 N_Acetyl_D_mannosamine_c
rxn05323	0.0706751	1.0 trans_Tetradec_2_enoyl__acp__c + 1.0 NADH_c + 1.0 H__c = 1.0 NAD__c + 1.0 Tetradecanoyl__acp__c
rxn05460	0.0706439	1.0 Hexadecanoyl__acp__c + 1.0 H__c + 1.0 Malonyl__acyl_carrier_protein__c = 1.0 3_Oxooctodecanoyl_ACP_c + 1.0 CO2_c + 1.0 Acyl_carrier_protein_c
rxn05429	0.0706439	1.0 12_methyl_tridecanoyl_ACP_c + 1.0 H__c + 1.0 Malonyl__acyl_carrier_protein__c = 1.0 CO2_c + 1.0 Acyl_carrier_protein_c + 1.0 14_methyl_3_oxo_pentadecanoyl_ACP_c
rxn05425	0.0706439	1.0 H__c + 1.0 Malonyl__acyl_carrier_protein__c + 1.0 10_methyl_undecanoyl_ACP_c = 1.0 12_methyl_3_oxo_tridecanoyl_ACP_c + 1.0 CO2_c + 1.0 Acyl_carrier_protein_c
rxn05421	0.0706439	1.0 H__c + 1.0 Malonyl__acyl_carrier_protein__c + 1.0 8_methyl_nonanoyl_ACP_c = 1.0 CO2_c + 1.0 Acyl_carrier_protein_c + 1.0 10_methyl_3_oxo_undecanoyl_ACP_c
rxn05417	0.0706439	1.0 H__c + 1.0 6_methyl_heptanoyl_ACP_c + 1.0 Malonyl__acyl_carrier_protein__c = 1.0 CO2_c + 1.0 Acyl_carrier_protein_c + 1.0 8_methyl_3_oxo_nonanoyl_ACP_c
rxn05413	0.0706439	1.0 H__c + 1.0 4_methyl_pentanoyl_ACP_c + 1.0 Malonyl__acyl_carrier_protein__c = 1.0 CO2_c + 1.0 Acyl_carrier_protein_c + 1.0 6_methyl_3_oxo_heptanoyl_ACP_c
rxn05409	0.0706439	1.0 H__c + 1.0 Malonyl__acyl_carrier_protein__c + 1.0 2_methylpropionyl_ACP_c = 1.0 CO2_c + 1.0 Acyl_carrier_protein_c + 1.0 4_methyl_3_oxo_pentanoyl_ACP_c
rxn05350	0.0706439	1.0 Hexanoyl__acp__c + 1.0 Malonyl__acyl_carrier_protein__c + 1.0 H__c = 1.0 3_Oxooctanoyl__acp__c + 1.0 CO2_c + 1.0 Acyl_carrier_protein_c
rxn05349	0.0706439	1.0 Acetyl_CoA_c + 1.0 Acyl_carrier_protein_c = 1.0 Acetyl__acyl_carrier_protein__c + 1.0 CoA_c
rxn05348	0.0706439	1.0 Decanoyl__acp__c + 1.0 H__c + 1.0 Malonyl__acyl_carrier_protein__c = 1.0 3_Oxododecanoyl__acp__c + 1.0 CO2_c + 1.0 Acyl_carrier_protein_c
rxn05347	0.0706439	1.0 H__c + 1.0 Acetyl__acyl_carrier_protein__c + 1.0 Malonyl__acyl_carrier_protein__c = 1.0 CO2_c + 1.0 Acetoacetyl__acp__c + 1.0 Acyl_carrier_protein_c
rxn05346	0.0706439	1.0 H__c + 1.0 Malonyl__acyl_carrier_protein__c + 1.0 Butyryl__acp__c = 1.0 CO2_c + 1.0 Acyl_carrier_protein_c + 1.0 3_Oxohexanoyl__acp__c
rxn05345	0.0706439	1.0 H__c + 1.0 Malonyl__acyl_carrier_protein__c + 1.0 Dodecanoyl__acyl_carrier_protein__c = 1.0 3_Oxotetradecanoyl__acp__c + 1.0 CO2_c + 1.0 Acyl_carrier_protein_c
rxn05344	0.0706439	1.0 Tetradecanoyl__acp__c + 1.0 Malonyl__acyl_carrier_protein__c + 1.0 H__c = 1.0 CO2_c + 1.0 3_Oxohexadecanoyl__acp__c + 1.0 Acyl_carrier_protein_c
rxn05343	0.0706439	1.0 H__c + 1.0 Octanoyl__acp__c + 1.0 Malonyl__acyl_carrier_protein__c = 1.0 3_Oxodecanoyl__acp__c + 1.0 CO2_c + 1.0 Acyl_carrier_protein_c
rxn02000	0.070466	1.0 4_6_Dideoxy_4_oxo_dTDP_D_glucose_c = 1.0 dTDP_4_dehydro_6_deoxy_L_mannose_c
rxn02632	0.0702676	1.0 NAD__c + 1.0 _S_S__Butane_2_3_diol_c = 1.0 _S__Acetoin_c + 1.0 H__c + 1.0 NADH_c
rxn05656	0.0701103	1.0 Sulfoacetate_e + 1.0 H2O_c + 1.0 ATP_c = 1.0 H__c + 1.0 Orthophosphate_c + 1.0 ADP_c + 1.0 Sulfoacetate_c
rxn05621	0.0701103	1.0 H2O_c + 1.0 Methanesulfonic_acid_e + 1.0 ATP_c = 1.0 H__c + 1.0 Orthophosphate_c + 1.0 Methanesulfonic_acid_c + 1.0 ADP_c
rxn05620	0.0701103	1.0 MOPS_e + 1.0 H2O_c + 1.0 ATP_c = 1.0 H__c + 1.0 Orthophosphate_c + 1.0 ADP_c + 1.0 MOPS_c
rxn05599	0.0701103	1.0 L_Cysteate_e + 1.0 H2O_c + 1.0 ATP_c = 1.0 H__c + 1.0 Orthophosphate_c + 1.0 ADP_c + 1.0 L_Cysteate_c
rxn05594	0.0701103	1.0 H2O_c + 1.0 2_Hydroxyethanesulfonate_e + 1.0 ATP_c = 1.0 H__c + 1.0 Orthophosphate_c + 1.0 2_Hydroxyethanesulfonate_c + 1.0 ADP_c
rxn05585	0.0701103	1.0 H2O_c + 1.0 hexanesulfonate_e + 1.0 ATP_c = 1.0 H__c + 1.0 Orthophosphate_c + 1.0 hexanesulfonate_c + 1.0 ADP_c
rxn05552	0.0701103	1.0 H2O_c + 1.0 ethanesulfonate_e + 1.0 ATP_c = 1.0 H__c + 1.0 Orthophosphate_c + 1.0 ethanesulfonate_c + 1.0 ADP_c
rxn05512	0.0701103	1.0 butanesulfonate_e + 1.0 H2O_c + 1.0 ATP_c = 1.0 H__c + 1.0 Orthophosphate_c + 1.0 ADP_c + 1.0 butanesulfonate_c
t_cpd11596	0.0701103	1.0 butanesulfonate_e + 1.0 H2O_c + 1.0 ATP_c = 1.0 H__c + 1.0 Orthophosphate_c + 1.0 ADP_c + 1.0 butanesulfonate_c
t_cpd11579	0.0701103	1.0 H2O_c + 1.0 ethanesulfonate_e + 1.0 ATP_c = 1.0 H__c + 1.0 Orthophosphate_c + 1.0 ethanesulfonate_c + 1.0 ADP_c
t_cpd11578	0.0701103	1.0 H2O_c + 1.0 hexanesulfonate_e + 1.0 ATP_c = 1.0 H__c + 1.0 Orthophosphate_c + 1.0 hexanesulfonate_c + 1.0 ADP_c
t_cpd11575	0.0701103	1.0 MOPS_e + 1.0 H2O_c + 1.0 ATP_c = 1.0 H__c + 1.0 Orthophosphate_c + 1.0 ADP_c + 1.0 MOPS_c
t_cpd09878	0.0701103	1.0 Sulfoacetate_e + 1.0 H2O_c + 1.0 ATP_c = 1.0 H__c + 1.0 Orthophosphate_c + 1.0 ADP_c + 1.0 Sulfoacetate_c
t_cpd08023	0.0701103	1.0 H2O_c + 1.0 Methanesulfonic_acid_e + 1.0 ATP_c = 1.0 H__c + 1.0 Orthophosphate_c + 1.0 Methanesulfonic_acid_c + 1.0 ADP_c
t_cpd03048	0.0701103	1.0 H2O_c + 1.0 2_Hydroxyethanesulfonate_e + 1.0 ATP_c = 1.0 H__c + 1.0 Orthophosphate_c + 1.0 2_Hydroxyethanesulfonate_c + 1.0 ADP_c
t_cpd00395	0.0701103	1.0 L_Cysteate_e + 1.0 H2O_c + 1.0 ATP_c = 1.0 H__c + 1.0 Orthophosphate_c + 1.0 ADP_c + 1.0 L_Cysteate_c
rxn11650	0.0693936	1.0 flavin_mononucleotide_reduced_c + 2.0 Cob_II_yrinate_a_c_diamide_c = 2.0 H__c + 1.0 FMN_c + 2.0 Cob_I_yrinate_a_c_diamide_c
rxn00690	0.0691295	1.0 Formate_c + 1.0 ATP_c + 1.0 Tetrahydrofolate_c = 1.0 10_Formyltetrahydrofolate_c + 1.0 Orthophosphate_c + 1.0 ADP_c
rxn04048	0.068621	1.0 S_Adenosyl_L_methionine_c + 1.0 Cobalt_precorrin_4_c = 1.0 S_Adenosyl_L_homocysteine_c + 1.0 Cobalt_precorrin_5_c
rxn03514	0.068621	1.0 S_Adenosyl_L_methionine_c + 1.0 Precorrin_4_c = 1.0 H__c + 1.0 Precorrin_5_c + 1.0 S_Adenosyl_L_homocysteine_c
rxn01675	0.0682917	1.0 dTTP_c + 1.0 D_Glucose_1_phosphate_c = 1.0 dTDP_glucose_c + 1.0 Diphosphate_c
rxn03991	0.0682836	1.0 NADPH_c + 2.0 Oxygen_c + 2.0 Nitric_oxide_c = 1.0 H__c + 2.0 Nitrate_c + 1.0 NADP__c
rxn05638	0.0677965	1.0 L_Proline_e + 1.0 H__e = 1.0 H__c + 1.0 L_Proline_c
rxn08556	0.066925	1.0 sn_Glycerol_3_phosphate_c + 1.0 Ubiquinone_8_c = 1.0 Glycerone_phosphate_c + 1.0 Ubiquinol_8_c
rxn01068	0.0656733	1.0 L_Threonine_c + 1.0 NAD__c = 1.0 L_2_Amino_3_oxobutanoic_acid_c + 1.0 H__c + 1.0 NADH_c
rxn12147	0.0646198	1.0 3D__3_5_4__Trihydroxycyclohexane_1_2_dione_c + 1.0 H2O_c = 1.0 H__c + 1.0 5_Deoxy_glucuronic_acid_c
rxn03931	0.0646198	1.0 3D__3_5_4__Trihydroxycyclohexane_1_2_dione_c + 1.0 H2O_c = 1.0 H__c + 1.0 2_Deoxy_5_keto_D_gluconic_acid_c
rxn05939	0.0643912	1.0 H__c + 1.0 Succinyl_CoA_c + 1.0 Reduced_ferredoxin_c + 1.0 CO2_c = 1.0 Oxidized_ferredoxin_c + 1.0 2_Oxoglutarate_c + 1.0 CoA_c
rxn00745	0.064213	1.0 Glycerone_c + 1.0 Phosphoenolpyruvate_c = 1.0 Pyruvate_c + 1.0 Glycerone_phosphate_c
rxn07586	0.0634558	1.0 H2O_c + 1.0 Cobalt_precorrin_5_c = 1.0 Cobalt_precorrin_5B_c + 1.0 Acetaldehyde_c + 1.0 H__c
rxn01013	0.0634373	1.0 D_Glycerate_c + 1.0 NADP__c = 1.0 NADPH_c + 1.0 Hydroxypyruvate_c + 1.0 H__c
rxn01011	0.0634373	1.0 NAD__c + 1.0 D_Glycerate_c = 1.0 H__c + 1.0 NADH_c + 1.0 Hydroxypyruvate_c
rxn00512	0.0634373	1.0 NAD__c + 1.0 Glycolate_c = 1.0 H__c + 1.0 NADH_c + 1.0 Glyoxylate_c
rxn01484	0.0631585	1.0 H2O_c + 1.0 N_Acetyl_D_glucosamine_6_phosphate_c = 1.0 D_Glucosamine_6_phosphate_c + 1.0 Acetate_c
rxn05024	0.0621564	1.0 H__c + 1.0 2_Succinylbenzoyl_CoA_c = 1.0 1_4_Dihydroxy_2_naphthoyl_CoA_c + 1.0 H2O_c
rxn02345	0.061187	1.0 _S__3_Hydroxybutanoyl_CoA_c = 1.0 _R__3_Hydroxybutanoyl_CoA_c
rxn02007	0.0608317	1.0 2_4_6_3_5_Pentahydroxycyclohexanone_c = 1.0 3D__3_5_4__Trihydroxycyclohexane_1_2_dione_c + 1.0 H2O_c
rxn09692	0.0606944	1.0 Choline_e + 1.0 H__e = 1.0 Choline_c + 1.0 H__c
rxn05298	0.0597772	1.0 Sodium_e + 1.0 L_Glutamate_e = 1.0 L_Glutamate_c + 1.0 Sodium_c
rxn00551	0.0597225	1.0 Diphosphate_c + 1.0 D_Fructose_6_phosphate_c = 1.0 H__c + 1.0 Orthophosphate_c + 1.0 D_Fructose_1_6_bisphosphate_c
rxn03060	0.0591423	1.0 2_Methylcitrate_c = 1.0 H2O_c + 1.0 _Z__But_2_ene_1_2_3_tricarboxylate_c
rxn10114	0.0591304	3.0 H__c + 1.0 Formate_c + 1.0 Ubiquinone_8_c = 1.0 CO2_c + 1.0 Ubiquinol_8_c + 2.0 H__e
t_cpd03724	0.0591125	1.0 H2O_c + 1.0 Ferrichrome_e + 1.0 ATP_c = 1.0 H__c + 1.0 Orthophosphate_c + 1.0 Ferrichrome_c + 1.0 ADP_c
rxn05188	0.0591125	1.0 H2O_c + 1.0 Ferrichrome_e + 1.0 ATP_c = 1.0 H__c + 1.0 Orthophosphate_c + 1.0 Ferrichrome_c + 1.0 ADP_c
t_cpd00047	0.0588177	1.0 Formate_e + 1.0 H__e = 1.0 H__c + 1.0 Formate_c
rxn05559	0.0588177	1.0 Formate_e + 1.0 H__e = 1.0 H__c + 1.0 Formate_c
rxn01280	0.0586775	1.0 NAD__c + 1.0 D_Glycerate_c = 1.0 H__c + 1.0 NADH_c + 1.0 2_Hydroxy_3_oxopropanoate_c
rxn05441	0.0579598	1.0 9_methyl_trans_dec_2_enoyl_ACP_c + 1.0 NADH_c + 1.0 H__c = 1.0 NAD__c + 1.0 9_methyl_decanoyl_ACP_c
rxn01281	0.0578481	1.0 D_Glycerate_c + 1.0 NADP__c = 1.0 2_Hydroxy_3_oxopropanoate_c + 1.0 NADPH_c + 1.0 H__c
rxn01457	0.0578011	1.0 D_Galacturonate_c = 1.0 D_Tagaturonate_c
rxn01080	0.0578011	1.0 D_Glucuronate_c = 1.0 D_Fructuronate_c
rxn01871	0.0573145	1.0 Acetyl_CoA_c + 1.0 Dihydrolipoamide_c = 1.0 CoA_c + 1.0 S_Acetyldihydrolipoamide_c
rxn01670	0.0568112	1.0 Nicotinamide_D_ribonucleotide_c + 1.0 H2O_c = 1.0 N_Ribosylnicotinamide_c + 1.0 H__c + 1.0 Orthophosphate_c
rxn01507	0.0568112	1.0 H2O_c + 1.0 dAMP_c = 1.0 H__c + 1.0 Orthophosphate_c + 1.0 Deoxyadenosine_c
rxn01445	0.0568112	1.0 H2O_c + 1.0 dGMP_c = 1.0 H__c + 1.0 Orthophosphate_c + 1.0 Deoxyguanosine_c
rxn00708	0.0568112	1.0 UMP_c + 1.0 H2O_c = 1.0 H__c + 1.0 Orthophosphate_c + 1.0 Uridine_c
rxn00363	0.0568112	1.0 H2O_c + 1.0 CMP_c = 1.0 H__c + 1.0 Orthophosphate_c + 1.0 Cytidine_c
rxn00132	0.0568112	1.0 H2O_c + 1.0 AMP_c = 1.0 H__c + 1.0 Orthophosphate_c + 1.0 Adenosine_c
t_cpd00211	0.0563793	1.0 Butanoic_acid_e + 1.0 H__e = 1.0 Butanoic_acid_c + 1.0 H__c
t_cpd00142	0.0563793	1.0 Acetoacetate_e + 1.0 H__e = 1.0 H__c + 1.0 Acetoacetate_c
rxn05683	0.0563793	1.0 Butanoic_acid_e + 1.0 H__e = 1.0 Butanoic_acid_c + 1.0 H__c
rxn05484	0.0563793	1.0 Acetoacetate_e + 1.0 H__e = 1.0 H__c + 1.0 Acetoacetate_c
rxn01834	0.0563793	1.0 _R__S_Lactoylglutathione_c = 1.0 Methylglyoxal_c + 1.0 Glutathione_c
rxn11544	0.056263	2.0 L_Glutamine_c + 1.0 H2O_c + 1.0 Hydrogenobyrinate_c + 2.0 ATP_c = 2.0 ADP_c + 2.0 L_Glutamate_c + 1.0 Hydrogenobyrinate_a_c_diamide_c + 1.0 Diphosphate_c
rxn06979	0.056263	2.0 L_Glutamine_c + 2.0 H2O_c + 1.0 Cobyrinate_c + 2.0 ATP_c = 1.0 Cob_II_yrinate_a_c_diamide_c + 2.0 H__c + 2.0 Orthophosphate_c + 2.0 L_Glutamate_c + 2.0 ADP_c
rxn04052	0.056263	1.0 Cobalt_precorrin_8_c = 1.0 Cobyrinate_c
rxn03512	0.056263	1.0 H__c + 1.0 Precorrin_8X_c = 1.0 Hydrogenobyrinate_c
t_cpd00210	0.0559474	1.0 H2O_c + 1.0 Taurine_e + 1.0 ATP_c = 1.0 H__c + 1.0 Orthophosphate_c + 1.0 Taurine_c + 1.0 ADP_c
rxn05172	0.0559474	1.0 H2O_c + 1.0 Taurine_e + 1.0 ATP_c = 1.0 H__c + 1.0 Orthophosphate_c + 1.0 Taurine_c + 1.0 ADP_c
rxn00714	0.0550189	1.0 H2O_c + 1.0 P1_P4_Bis_5__uridyl__tetraphosphate_c = 1.0 UMP_c + 1.0 UTP_c
rxn03075	0.0549498	1.0 5__2_Hydroxyethyl__4_methylthiazole_c + 1.0 ATP_c = 1.0 4_Methyl_5__2_phosphoethyl__thiazole_c + 1.0 ADP_c
t_cpd00035	0.054654	1.0 Sodium_e + 1.0 L_Alanine_e = 1.0 L_Alanine_c + 1.0 Sodium_c
rxn05215	0.054654	1.0 Sodium_e + 1.0 L_Alanine_e = 1.0 L_Alanine_c + 1.0 Sodium_c
t_cpd00138	0.0533353	1.0 H__c + 1.0 D_Glucose_e + 1.0 D_Mannose_c = 1.0 H__e + 1.0 D_Glucose_c + 1.0 D_Mannose_e
rxn05573	0.0533353	1.0 D_Glucose_e + 1.0 H__e = 1.0 H__c + 1.0 D_Glucose_c
rxn00966	0.0530077	1.0 Chorismate_c = 1.0 Pyruvate_c + 1.0 4_Hydroxybenzoate_c
t_cpd00162	0.0525408	1.0 Ethanolamine_e + 1.0 H__e = 1.0 H__c + 1.0 Ethanolamine_c
rxn05551	0.0525408	1.0 Ethanolamine_e + 1.0 H__e = 1.0 H__c + 1.0 Ethanolamine_c
rxn12146	0.0522383	1.0 5_Deoxy_glucuronic_acid_c = 1.0 2_Deoxy_5_keto_D_gluconic_acid_c
t_cpd01329	0.0522021	1.0 H2O_c + 1.0 ATP_c + 1.0 Maltohexaose_e = 1.0 Maltohexaose_c + 1.0 H__c + 1.0 Orthophosphate_c + 1.0 ADP_c
t_cpd01262	0.0522021	1.0 H2O_c + 1.0 ATP_c + 1.0 Maltotriose_e = 1.0 Maltotriose_c + 1.0 H__c + 1.0 Orthophosphate_c + 1.0 ADP_c
rxn10174	0.0522021	1.0 H2O_c + 1.0 ATP_c + 1.0 Maltohexaose_e = 1.0 Maltohexaose_c + 1.0 H__c + 1.0 Orthophosphate_c + 1.0 ADP_c
rxn05608	0.0522021	1.0 H2O_c + 1.0 ATP_c + 1.0 Maltotriose_e = 1.0 Maltotriose_c + 1.0 H__c + 1.0 Orthophosphate_c + 1.0 ADP_c
t_cpd04098	0.0521125	1.0 Arsenite_c = 1.0 Arsenite_e
t_cpd01048	0.0521125	1.0 Arsenic_acid_c = 1.0 Arsenic_acid_e
rxn05507	0.0521125	1.0 Arsenite_c = 1.0 Arsenite_e
rxn05506	0.0521125	1.0 Arsenic_acid_c = 1.0 Arsenic_acid_e
rxn05434	0.0520464	1.0 H__c + 1.0 6_methyl_trans_oct_2_enoyl_ACP_c + 1.0 NADH_c = 1.0 NAD__c + 1.0 6_methyl_octanoyl_ACP_c
rxn00602	0.0520464	1.0 _R__2_Methyl_3_oxopropanoyl_CoA_c = 1.0 Succinyl_CoA_c
rxn02875	0.0509721	1.0 H2O_c + 1.0 N_Acetylmuramoyl_Ala_c = 1.0 L_Alanine_c + 1.0 N_Acetylmuramate_c
rxn04045	0.0508659	2.0 H__c + 1.0 Sirohydrochlorin_c + 1.0 Cobalt_c = 1.0 Cobalt_precorrin_2_c
rxn02898	0.0506731	1.0 2_Succinylbenzoyl_CoA_c = 1.0 1_4_Dihydroxy_2_naphthoate_c + 1.0 CoA_c
rxn02832	0.0506731	1.0 2_Succinyl_6_hydroxy_2_4_cyclohexadiene_1_carboxylate_c = 1.0 2_Succinylbenzoate_c + 1.0 H2O_c
rxn02143	0.0505354	1.0 Succinyl_CoA_c + 1.0 3_Oxoadipate_c = 1.0 Succinate_c + 1.0 3_Oxoadipyl_CoA_c
t_cpd11576	0.0504826	1.0 H2O_c + 1.0 L_methionine_R_oxide_e + 1.0 ATP_c = 1.0 H__c + 1.0 Orthophosphate_c + 1.0 L_methionine_R_oxide_c + 1.0 ADP_c
t_cpd01914	0.0504826	1.0 H2O_c + 1.0 L_Methionine_S_oxide_e + 1.0 ATP_c = 1.0 H__c + 1.0 Orthophosphate_c + 1.0 L_Methionine_S_oxide_c + 1.0 ADP_c
t_cpd00637	0.0504826	1.0 H2O_c + 1.0 D_Methionine_e + 1.0 ATP_c = 1.0 H__c + 1.0 Orthophosphate_c + 1.0 D_Methionine_c + 1.0 ADP_c
t_cpd00060	0.0504826	1.0 H2O_c + 1.0 L_Methionine_e + 1.0 ATP_c = 1.0 H__c + 1.0 Orthophosphate_c + 1.0 L_Methionine_c + 1.0 ADP_c
rxn05614	0.0504826	1.0 H2O_c + 1.0 L_methionine_R_oxide_e + 1.0 ATP_c = 1.0 H__c + 1.0 Orthophosphate_c + 1.0 L_methionine_R_oxide_c + 1.0 ADP_c
rxn05613	0.0504826	1.0 H2O_c + 1.0 L_Methionine_S_oxide_e + 1.0 ATP_c = 1.0 H__c + 1.0 Orthophosphate_c + 1.0 L_Methionine_S_oxide_c + 1.0 ADP_c
rxn05219	0.0504826	1.0 H2O_c + 1.0 L_Methionine_e + 1.0 ATP_c = 1.0 H__c + 1.0 Orthophosphate_c + 1.0 L_Methionine_c + 1.0 ADP_c
rxn05183	0.0504826	1.0 H2O_c + 1.0 D_Methionine_e + 1.0 ATP_c = 1.0 H__c + 1.0 Orthophosphate_c + 1.0 D_Methionine_c + 1.0 ADP_c
rxn03932	0.0504188	1.0 2_Deoxy_5_keto_D_gluconic_acid_c + 1.0 ATP_c = 1.0 6_Phospho_5_dehydro_2_deoxy_D_gluconate_c + 1.0 ADP_c
rxn01176	0.0504188	1.0 6_Phospho_5_dehydro_2_deoxy_D_gluconate_c = 1.0 Glycerone_phosphate_c + 1.0 3_Oxopropanoate_c
rxn01833	0.0494899	1.0 H2O_c + 1.0 Oxygen_c + 1.0 Aminoacetone_c = 1.0 H2O2_c + 1.0 Methylglyoxal_c + 1.0 NH3_c
rxn01715	0.0494899	1.0 H2O_c + 1.0 Tyramine_c + 1.0 Oxygen_c = 1.0 H2O2_c + 1.0 4_Hydroxyphenylacetaldehyde_c + 1.0 NH3_c
rxn02429	0.0492223	1.0 2_Dehydro_3_deoxy_D_galactonate_c + 1.0 ATP_c = 1.0 2_Dehydro_3_deoxy_D_galactonate_6_phosphate_c + 1.0 ADP_c
rxn02173	0.0492223	1.0 D_Galactonate_c = 1.0 H2O_c + 1.0 2_Dehydro_3_deoxy_D_galactonate_c
rxn00783	0.0492223	1.0 2_Dehydro_3_deoxy_D_galactonate_6_phosphate_c = 1.0 Pyruvate_c + 1.0 D_Glyceraldehyde_3_phosphate_c
rxn00679	0.0485322	1.0 Propanoyl_CoA_c + 1.0 H2O_c + 1.0 Oxaloacetate_c = 1.0 H__c + 1.0 CoA_c + 1.0 2_Methylcitrate_c
rxn09188	0.0480018	1.0 L_Proline_c + 1.0 FAD_c = 1.0 _S__1_Pyrroline_5_carboxylate_c + 1.0 FADH2_c
rxn02359	0.0480018	1.0 trans_4_Hydroxy_L_proline_c + 1.0 FAD_c = 1.0 L_1_Pyrroline_3_hydroxy_5_carboxylate_c + 1.0 FADH2_c
rxn00503	0.0480018	1.0 _S__1_Pyrroline_5_carboxylate_c + 1.0 NAD__c + 2.0 H2O_c = 1.0 H__c + 1.0 L_Glutamate_c + 1.0 NADH_c
rxn10342	0.0479693	2.0 Diisohexadecanoylphosphatidylglycerol_c = 1.0 Glycerol_c + 1.0 Isohexadecanoylcardiolipin__B__subtilis__c
rxn10341	0.0479693	2.0 Dianteisopentadecanoylphosphatidylglycerol_c = 1.0 Glycerol_c + 1.0 Anteisopentadecanoylcardiolipin__B__subtilis__c
rxn10340	0.0479693	2.0 Diisopentadecanoylphosphatidylglycerol_c = 1.0 Glycerol_c + 1.0 Isopentadecanoylcardiolipin__B__subtilis__c
rxn10339	0.0479693	2.0 Diisotetradecanoylphosphatidylglycerol_c = 1.0 Glycerol_c + 1.0 Isotetradecanoylcardiolipin__B__subtilis__c
rxn10338	0.0479693	2.0 Dianteisoheptadecanoylphosphatidylglycerol_c = 1.0 Glycerol_c + 1.0 Anteisoheptadecanoylcardiolipin__B__subtilis__c
rxn10337	0.0479693	2.0 Diisoheptadecanoylphosphatidylglycerol_c = 1.0 Glycerol_c + 1.0 Isoheptadecanoylcardiolipin__B__subtilis__c
rxn10336	0.0479693	2.0 Phosphatidylglycerol_dioctadecanoyl_c = 1.0 Stearoylcardiolipin__B__subtilis__c + 1.0 Glycerol_c
rxn10335	0.0479693	2.0 Phosphatidylglycerol_ditetradecanoyl_c = 1.0 Myristoylcardiolipin__B__subtilis__c + 1.0 Glycerol_c
rxn10334	0.0479693	2.0 Phosphatidylglycerol_dihexadecanoyl_c = 1.0 Glycerol_c + 1.0 Palmitoylcardiolipin__B__subtilis__c
rxn01966	0.0477478	1.0 alpha_alpha_Trehalose_c + 1.0 H__c + 1.0 Orthophosphate_c = 1.0 D_Glucose_c + 1.0 beta_D_Glucose_1_phosphate_c
rxn05444	0.0474401	1.0 H__c + 1.0 NADH_c + 1.0 15_methyl_trans_hexa_dec_2_enoyl_ACP_c = 1.0 NAD__c + 1.0 15_methyl_hexa_decanoyl_ACP_c
rxn05395	0.0469244	1.0 9_methyl_trans_dec_2_enoyl_ACP_c + 1.0 NADPH_c + 1.0 H__c = 1.0 9_methyl_decanoyl_ACP_c + 1.0 NADP__c
rxn02946	0.0468461	1.0 cis_4_Hydroxy_D_proline_c + 1.0 Oxygen_c = 1.0 H2O2_c + 1.0 1_Pyrroline_4_hydroxy_2_carboxylate_c
rxn02071	0.0468461	1.0 D_Proline_c + 1.0 Oxygen_c = 1.0 H2O2_c + 1.0 1_Pyrroline_2_carboxylate_c
rxn00615	0.0465438	1.0 Glycerol_c + 1.0 ATP_c = 1.0 sn_Glycerol_3_phosphate_c + 1.0 ADP_c
rxn08194	0.0464511	1.0 ATP_c + 1.0 Cob_I_alamin_c = 1.0 Cobamide_coenzyme_c + 1.0 Triphosphate_c
rxn05029	0.0464511	1.0 ATP_c + 1.0 Cobinamide_c = 1.0 Adenosyl_cobinamide_c + 1.0 Triphosphate_c
rxn03535	0.0464511	1.0 Cob_I_yrinate_a_c_diamide_c + 1.0 ATP_c = 1.0 Triphosphate_c + 1.0 Adenosyl_cobyrinate_a_c_diamide_c
rxn02177	0.0463204	1.0 H2O_c + 1.0 Isochorismate_c = 1.0 Pyruvate_c + 1.0 2_3_Dihydro_2_3_dihydroxybenzoate_c
rxn11944	0.0460257	1.0 5_Methyltetrahydropteroyltri_L_glutamate_c + 1.0 S_Adenosyl_L_homocysteine_c + 1.0 H__c = 1.0 S_Adenosyl_L_methionine_c + 1.0 Tetrahydropteroyltri_L_glutamate_c
rxn11702	0.0455506	1.0 H__c + 1.0 2_Oxoglutarate_c + 1.0 Isochorismate_c = 1.0 CO2_c + 1.0 2_Succinyl_5_enolpyruvyl_6_hydroxy_3_cyclohexene_1_carboxylate_c
rxn01015	0.0453079	1.0 Hydroxypyruvate_c = 1.0 2_Hydroxy_3_oxopropanoate_c
rxn01132	0.0452321	1.0 H__c + 1.0 Orthophosphate_c + 1.0 Maltose_c = 1.0 D_Glucose_c + 1.0 beta_D_Glucose_1_phosphate_c
rxn00568	0.0450738	5.0 H__c + 3.0 NADH_c + 1.0 Nitrite_c = 3.0 NAD__c + 2.0 H2O_c + 1.0 NH3_c
rxn02085	0.0448996	1.0 4_Imidazolone_5_propanoate_c = 1.0 H2O_c + 1.0 Urocanate_c
rxn01291	0.0448795	1.0 L_Arabitol_c + 1.0 NADP__c = 1.0 H__c + 1.0 NADPH_c + 1.0 L_Arabinose_c
rxn01951	0.0442385	1.0 ATP_c + 1.0 N_Acetyl_D_mannosamine_c = 1.0 ADP_c + 1.0 N_Acetyl_D_mannosamine_6_phosphate_c
rxn01521	0.043899	1.0 H2O_c + 1.0 dUMP_c = 1.0 H__c + 1.0 Orthophosphate_c + 1.0 Deoxyuridine_c
rxn01523	0.0433749	1.0 H2O_c + 1.0 Urate_c + 1.0 Oxygen_c = 1.0 5_Hydroxyisourate_c + 1.0 H2O2_c
rxn01025	0.0426972	1.0 H__c + 1.0 H2O_c + 1.0 5_Methylcytosine_c = 1.0 Thymine_c + 1.0 NH3_c
rxn00717	0.0426972	1.0 Cytosine_c + 1.0 H__c + 1.0 H2O_c = 1.0 Uracil_c + 1.0 NH3_c
rxn05669	0.0418552	1.0 L_Valine_e + 1.0 H__e = 1.0 H__c + 1.0 L_Valine_c
rxn05244	0.0418552	1.0 L_Isoleucine_e + 1.0 H__e = 1.0 H__c + 1.0 L_Isoleucine_c
rxn05243	0.0418552	1.0 H__e + 1.0 L_Leucine_e = 1.0 H__c + 1.0 L_Leucine_c
rxn03838	0.0408829	1.0 H2O_c + 1.0 D_Gal_alpha_1_6D_Gal_alpha_1__6D_Glucose_c = 1.0 Melibiose_c + 1.0 D_Galactose_c
rxn02596	0.0408829	1.0 H2O_c + 1.0 Stachyose_c = 1.0 Raffinose_c + 1.0 D_Galactose_c
rxn00818	0.0408829	1.0 Raffinose_c + 1.0 H2O_c = 1.0 Sucrose_c + 1.0 D_Galactose_c
rxn00817	0.0408829	1.0 H2O_c + 1.0 Melibiose_c = 1.0 D_Glucose_c + 1.0 D_Galactose_c
rxn01225	0.0407583	1.0 H__c + 1.0 H2O_c + 1.0 Guanine_c = 1.0 Xanthine_c + 1.0 NH3_c
rxn06600	0.0403886	1.0 S_Aminomethyldihydrolipoylprotein_c + 1.0 Tetrahydrofolate_c = 1.0 Dihydrolipoylprotein_c + 1.0 5_10_Methylenetetrahydrofolate_c + 1.0 NH3_c
rxn00260	0.0403886	1.0 2_Oxoglutarate_c + 1.0 L_Aspartate_c = 1.0 L_Glutamate_c + 1.0 Oxaloacetate_c
rxn02760	0.040386	1.0 H2O_c + 1.0 Sucrose_6_phosphate_c = 1.0 D_Glucose_6_phosphate_c + 1.0 D_Fructose_c
rxn01737	0.040386	1.0 Raffinose_c + 1.0 H2O_c = 1.0 Melibiose_c + 1.0 D_Fructose_c
rxn05464	0.0401672	1.0 trans_Octodec_2_enoyl_ACP_c + 1.0 NADH_c + 1.0 H__c = 1.0 NAD__c + 1.0 Octodecanoyl_ACP_c
rxn05450	0.0401672	1.0 NADH_c + 1.0 H__c + 1.0 14_methyl_trans_pentadec_2_enoyl_ACP_c = 1.0 NAD__c + 1.0 14_methyl_pentadecanoyl_ACP_c
rxn05449	0.0401672	1.0 H__c + 1.0 12_methyl_trans_tridec_2_enoyl_ACP_c + 1.0 NADH_c = 1.0 12_methyl_tridecanoyl_ACP_c + 1.0 NAD__c
rxn05448	0.0401672	1.0 H__c + 1.0 10_methyl_trans_undec_2_enoyl_ACP_c + 1.0 NADH_c = 1.0 NAD__c + 1.0 10_methyl_undecanoyl_ACP_c
rxn05447	0.0401672	1.0 H__c + 1.0 NADH_c + 1.0 8_methyl_trans_non_2_enoyl_ACP_c = 1.0 NAD__c + 1.0 8_methyl_nonanoyl_ACP_c
rxn05446	0.0401672	1.0 H__c + 1.0 NADH_c + 1.0 6_methyl_trans_hept_2_enoyl_ACP_c = 1.0 NAD__c + 1.0 6_methyl_heptanoyl_ACP_c
rxn05445	0.0401672	1.0 4_methyl_trans_pent_2_enoyl_ACP_c + 1.0 H__c + 1.0 NADH_c = 1.0 NAD__c + 1.0 4_methyl_pentanoyl_ACP_c
rxn05328	0.0401672	1.0 trans_Hexadec_2_enoyl__acp__c + 1.0 H__c + 1.0 NADH_c = 1.0 Hexadecanoyl__acp__c + 1.0 NAD__c
rxn05327	0.0401672	1.0 trans_Dec_2_enoyl__acp__c + 1.0 H__c + 1.0 NADH_c = 1.0 Decanoyl__acp__c + 1.0 NAD__c
rxn05326	0.0401672	1.0 H__c + 1.0 trans_Hex_2_enoyl__acp__c + 1.0 NADH_c = 1.0 NAD__c + 1.0 Hexanoyl__acp__c
rxn05325	0.0401672	1.0 H__c + 1.0 trans_Oct_2_enoyl__acp__c + 1.0 NADH_c = 1.0 NAD__c + 1.0 Octanoyl__acp__c
rxn05324	0.0401672	1.0 H__c + 1.0 NADH_c + 1.0 trans_Dodec_2_enoyl__acp__c = 1.0 NAD__c + 1.0 Dodecanoyl__acyl_carrier_protein__c
rxn05322	0.0401672	1.0 But_2_enoyl__acyl_carrier_protein__c + 1.0 NADH_c + 1.0 H__c = 1.0 NAD__c + 1.0 Butyryl__acp__c
rxn00355	0.0401473	1.0 UTP_c + 1.0 alpha_D_Galactose_1_phosphate_c = 1.0 Diphosphate_c + 1.0 UDP_D_galactose_c
rxn00858	0.0395355	1.0 Agmatine_c + 1.0 H2O_c = 1.0 Putrescine_c + 1.0 Urea_c
t_cpd00033	0.0394365	1.0 Glycine_e + 1.0 H__e = 1.0 H__c + 1.0 Glycine_c
rxn00157	0.0386986	1.0 Acetyl_CoA_c + 1.0 Formate_c = 1.0 Pyruvate_c + 1.0 CoA_c
rxn00342	0.0385054	1.0 H2O_c + 1.0 L_Asparagine_c = 1.0 L_Aspartate_c + 1.0 NH3_c
rxn01145	0.0384994	1.0 H2O_c + 1.0 dTMP_c = 1.0 Thymidine_c + 1.0 H__c + 1.0 Orthophosphate_c
rxn04602	0.0383766	1.0 H__c + 1.0 NADH_c + 1.0 3_Coumaric_acid_c + 1.0 Oxygen_c = 1.0 trans_2_3_Dihydroxycinnamate_c + 1.0 NAD__c + 1.0 H2O_c
rxn04601	0.0383766	1.0 H__c + 1.0 NADH_c + 1.0 3__3_Hydroxy_phenyl__propanoic_acid_c + 1.0 Oxygen_c = 1.0 NAD__c + 1.0 H2O_c + 1.0 3__2_3_Dihydroxyphenyl_propanoate_c
rxn00529	0.0383766	1.0 H__c + 1.0 L_Tyrosine_c = 1.0 CO2_c + 1.0 Tyramine_c
rxn00497	0.0383766	1.0 H__c + 1.0 L_Phenylalanine_c = 1.0 CO2_c + 1.0 Phenethylamine_c
rxn00484	0.0383766	1.0 L_Tryptophan_c + 1.0 H__c = 1.0 CO2_c + 1.0 Tryptamine_c
rxn05435	0.0382937	1.0 H__c + 1.0 8_methyl_trans_dec_2_enoyl_ACP_c + 1.0 NADH_c = 1.0 NAD__c + 1.0 8_methyl_decanoyl_ACP_c
rxn02314	0.0380641	1.0 D_Tagatose_6_phosphate_c + 1.0 ATP_c = 1.0 ADP_c + 1.0 D_Tagatose_1_6_bisphosphate_c
rxn03893	0.0378091	1.0 4_Hydroxybenzoate_c + 1.0 all_trans_Octaprenyl_diphosphate_c = 1.0 Diphosphate_c + 1.0 3_Octaprenyl_4_hydroxybenzoate_c
rxn00006	0.0377076	2.0 H2O2_c = 2.0 H2O_c + 1.0 Oxygen_c
rxn01923	0.0371685	2.0 2_Methylpropanoyl_CoA_c + 1.0 Oxygen_c = 2.0 2_Methylprop_2_enoyl_CoA_c + 2.0 H2O_c
rxn01146	0.0368289	1.0 Thymidine_c + 1.0 H__c + 1.0 Orthophosphate_c = 1.0 Thymine_c + 1.0 2_Deoxy_D_ribose_1_phosphate_c
rxn00669	0.0368193	1.0 Propanoate_c + 1.0 CoA_c + 1.0 ATP_c = 1.0 Propanoyl_CoA_c + 1.0 Orthophosphate_c + 1.0 ADP_c
rxn04748	0.0366662	1.0 4_Methylsalicylate_c + 1.0 NADH_c + 1.0 Oxygen_c + 2.0 H__c = 1.0 NAD__c + 1.0 H2O_c + 1.0 4_Methylcatechol_c + 1.0 CO2_c
rxn04745	0.0366662	2.0 H__c + 1.0 NADH_c + 1.0 Oxygen_c + 1.0 4_Hydroxymethylsalicylate_c = 1.0 NAD__c + 1.0 4_Hydroxymethylcatechol_c + 1.0 H2O_c + 1.0 CO2_c
rxn04724	0.0366662	2.0 H__c + 1.0 NADH_c + 1.0 3_Methylsalicylate_c + 1.0 Oxygen_c = 1.0 NAD__c + 1.0 H2O_c + 1.0 CO2_c + 1.0 2_3_Dihydroxytoluene_c
rxn03906	0.0366662	2.0 H__c + 1.0 NADH_c + 1.0 1_Hydroxy_2_naphthoate_c + 1.0 Oxygen_c = 1.0 NAD__c + 1.0 H2O_c + 1.0 CO2_c + 1.0 Naphthalene_1_2_diol_c
rxn00589	0.0366662	2.0 H__c + 1.0 NADH_c + 1.0 Oxygen_c + 1.0 Salicylate_c = 1.0 NAD__c + 1.0 H2O_c + 1.0 CO2_c + 1.0 Catechol_c
rxn01967	0.0364382	1.0 beta_D_Glucose_1_phosphate_c = 1.0 beta_D_Glucose_6_phosphate_c
rxn05443	0.036362	1.0 13_methyl_trans_tetra_dec_2_enoyl_ACP_c + 1.0 H__c + 1.0 NADH_c = 1.0 NAD__c + 1.0 13_methyl_tetra_decanoyl_ACP_c
rxn05616	0.0357617	1.0 Magnesium_e = 1.0 Magnesium_c
t_cpd00098	0.0356158	1.0 Choline_e + 1.0 H__e = 1.0 Choline_c + 1.0 H__c
rxn05158	0.0350148	1.0 H2O_c + 1.0 ATP_c + 1.0 sn_Glycerol_3_phosphate_e = 1.0 sn_Glycerol_3_phosphate_c + 1.0 Orthophosphate_c + 1.0 ADP_c + 1.0 H__c
rxn02400	0.0345212	1.0 H2O_c + 1.0 Nicotinate_D_ribonucleotide_c = 1.0 H__c + 1.0 Orthophosphate_c + 1.0 Nicotinate_D_ribonucleoside_c
rxn01961	0.0345212	1.0 Xanthosine_5__phosphate_c + 1.0 H2O_c = 1.0 H__c + 1.0 Orthophosphate_c + 1.0 Xanthosine_c
rxn00831	0.0345212	1.0 H2O_c + 1.0 IMP_c = 1.0 H__c + 1.0 Orthophosphate_c + 1.0 Inosine_c
t_cpd00159	0.0344646	1.0 _S__Lactate_e + 1.0 H__e = 1.0 H__c + 1.0 _S__Lactate_c
rxn00897	0.033775	1.0 N_Acetyl_D_glucosamine_c = 1.0 N_Acetyl_D_mannosamine_c
rxn00656	0.0336598	1.0 L_Alanine_c + 1.0 3_Oxopropanoate_c = 1.0 Pyruvate_c + 1.0 beta_Alanine_c
rxn00405	0.0330419	1.0 H__c + 1.0 L_Arginine_c = 1.0 Agmatine_c + 1.0 CO2_c
rxn00322	0.0330419	1.0 L_Lysine_c + 1.0 H__c = 1.0 CO2_c + 1.0 Cadaverine_c
rxn00577	0.0328846	1.0 Sucrose_c + 1.0 Orthophosphate_c + 1.0 H__c = 1.0 D_Fructose_c + 1.0 D_Glucose_1_phosphate_c
rxn01925	0.0328846	1.0 2_Methylpropanoyl_CoA_c + 1.0 Dihydrolipoamide_c = 1.0 S__2_Methylpropanoyl__dihydrolipoamide_c + 1.0 CoA_c
rxn08299	0.0325088	1.0 1_2_Diacyl_sn_glycerol_dioctadecanoyl_c + 1.0 ATP_c = 1.0 1_2_dioctadecanoyl_sn_glycerol_3_phosphate_c + 1.0 ADP_c
rxn09067	0.0325088	1.0 1_2_dioctadecanoyl_sn_glycerol_3_phosphate_c + 1.0 H2O_c = 1.0 H__c + 1.0 Orthophosphate_c + 1.0 1_2_Diacyl_sn_glycerol_dioctadecanoyl_c
rxn01602	0.0324938	1.0 Dihydrofolate_c + 1.0 NADP__c = 1.0 H__c + 1.0 NADPH_c + 1.0 Folate_c
rxn00216	0.0321689	1.0 D_Glucose_c + 1.0 ATP_c = 1.0 D_Glucose_6_phosphate_c + 1.0 ADP_c
rxn01477	0.0320932	1.0 6_Phospho_D_gluconate_c = 1.0 H2O_c + 1.0 2_Dehydro_3_deoxy_6_phospho_D_gluconate_c
rxn10118	0.032035	1.0 Hydrogen_c + 2.0 H__c + 1.0 Ubiquinone_8_c = 1.0 Ubiquinol_8_c + 2.0 H__e
rxn10253	0.0319578	1.0 1_2_Diisoheptadecanoyl_sn_glycerol_c + 1.0 ATP_c = 1.0 1_2_diisoheptadecanoyl_sn_glycerol_3_phosphate_c + 1.0 ADP_c
rxn10238	0.0319578	1.0 H2O_c + 1.0 1_2_diisoheptadecanoyl_sn_glycerol_3_phosphate_c = 1.0 H__c + 1.0 Orthophosphate_c + 1.0 1_2_Diisoheptadecanoyl_sn_glycerol_c
rxn12822	0.0319363	2.0 L_Glutamate_c + 2.0 Oxidized_ferredoxin_c = 1.0 L_Glutamine_c + 2.0 H__c + 1.0 2_Oxoglutarate_c + 2.0 Reduced_ferredoxin_c
rxn02297	0.0317765	1.0 L_Alanine_c + 1.0 H__c + 1.0 6_Carboxyhexanoyl_CoA_c = 1.0 CO2_c + 1.0 CoA_c + 1.0 8_Amino_7_oxononanoate_c
rxn04047	0.0317327	1.0 S_Adenosyl_L_methionine_c + 1.0 Cobalt_precorrin_3_c = 1.0 H__c + 1.0 S_Adenosyl_L_homocysteine_c + 1.0 Cobalt_precorrin_4_c
rxn04046	0.0317327	1.0 S_Adenosyl_L_methionine_c + 1.0 Cobalt_precorrin_2_c = 1.0 H__c + 1.0 Cobalt_precorrin_3_c + 1.0 S_Adenosyl_L_homocysteine_c
rxn03513	0.0317327	1.0 Precorrin_3B_c + 1.0 S_Adenosyl_L_methionine_c = 2.0 H__c + 1.0 Precorrin_4_c + 1.0 S_Adenosyl_L_homocysteine_c
rxn02775	0.0317327	1.0 Precorrin_2_c + 1.0 H__c + 1.0 S_Adenosyl_L_methionine_c = 1.0 S_Adenosyl_L_homocysteine_c + 1.0 Precorrin_3A_c
rxn01991	0.030909	1.0 H2O_c + 1.0 meso_2_6_Diaminoheptanedioate_c + 1.0 NADP__c = 1.0 H__c + 1.0 L_2_Amino_6_oxoheptanedioate_c + 1.0 NADPH_c + 1.0 NH3_c
rxn02161	0.030473	1.0 ATP_c + 1.0 L_Rhamnulose_c = 1.0 L_Rhamnulose_1_phosphate_c + 1.0 ADP_c
rxn01761	0.030473	1.0 L_Rhamnose_c = 1.0 L_Rhamnulose_c
rxn01621	0.030473	1.0 L_Rhamnulose_1_phosphate_c = 1.0 Glycerone_phosphate_c + 1.0 _S__Lactaldehyde_c
rxn01390	0.030473	1.0 L_Xylulose_c + 1.0 ATP_c = 1.0 L_Xylulose_1_phosphate_c + 1.0 ADP_c
t_cpd00039	0.0302183	1.0 L_Lysine_c + 1.0 H__e = 1.0 H__c + 1.0 L_Lysine_e
rxn00131	0.0301222	1.0 H2O_c + 1.0 AMP_c = 1.0 D_Ribose_5_phosphate_c + 1.0 Adenine_c
rxn05438	0.0297896	1.0 H__c + 1.0 14_methyl_trans_hexa_dec_2_enoyl_ACP_c + 1.0 NADH_c = 1.0 14_methyl_hexa_decanoyl_ACP_c + 1.0 NAD__c
rxn05579	0.0292776	1.0 Betaine_e + 1.0 H__e = 1.0 H__c + 1.0 Betaine_c
rxn05645	0.0292227	1.0 Riboflavin_e + 1.0 H__e = 1.0 H__c + 1.0 Riboflavin_c
rxn01615	0.0292227	1.0 NAD__c + 1.0 Propane_1_2_diol_c = 1.0 H__c + 1.0 NADH_c + 1.0 _S__Lactaldehyde_c
t_cpd00220	0.0292227	1.0 Riboflavin_e + 1.0 H__e = 1.0 H__c + 1.0 Riboflavin_c
rxn10806	0.0292227	2.0 H__c + 0.5 Oxygen_c + 1.0 Menaquinol_8_c = 1.0 H2O_c + 1.0 Menaquinone_8_c + 2.0 H__e
rxn10094	0.0292227	1.0 S_Adenosyl_L_methionine_c + 1.0 2_Demethylmenaquinone_8_c = 1.0 H__c + 1.0 Menaquinone_8_c + 1.0 S_Adenosyl_L_homocysteine_c
rxn10043	0.0292227	6.0 H__c + 2.0 Ferrocytochrome_c_c + 0.5 Oxygen_c = 1.0 H2O_c + 2.0 Ferricytochrome_c_c + 4.0 H__e
rxn08976	0.0292227	1.0 H__c + 1.0 2_Demethylmenaquinone_8_c + 1.0 NADH_c = 1.0 NAD__c + 1.0 2_Demethylmenaquinol_8_c
rxn08975	0.0292227	1.0 H__c + 1.0 NADH_c + 1.0 Ubiquinone_8_c = 1.0 NAD__c + 1.0 Ubiquinol_8_c
rxn08971	0.0292227	1.0 H__c + 1.0 Menaquinone_8_c + 1.0 NADH_c = 1.0 NAD__c + 1.0 Menaquinol_8_c
rxn08707	0.0292227	1.0 H2O_c + 1.0 trans_trans_Farnesyl_diphosphate_c + 1.0 Heme_c = 1.0 Diphosphate_c + 1.0 Heme_O_c
rxn04674	0.0292227	1.0 S_Adenosyl_L_methionine_c + 1.0 2_Phytyl_1_4_naphthoquinone_c = 1.0 Phylloquinone_c + 1.0 H__c + 1.0 S_Adenosyl_L_homocysteine_c
rxn03397	0.0292227	1.0 2_Octaprenyl_6_methoxy_1_4_benzoquinone_c + 1.0 S_Adenosyl_L_methionine_c = 1.0 H__c + 1.0 2_Octaprenyl_3_methyl_6_methoxy_1_4_benzoquinone_c + 1.0 S_Adenosyl_L_homocysteine_c
rxn03384	0.0292227	4.0 H__c + 1.0 Uroporphyrinogen_I_c = 4.0 CO2_c + 1.0 Coproporphyrinogen_I_c
rxn03004	0.0292227	1.0 10_Formyltetrahydrofolate_c + 1.0 5__Phosphoribosylglycinamide_c = 1.0 5__Phosphoribosyl_N_formylglycinamide_c + 1.0 H__c + 1.0 Tetrahydrofolate_c
rxn02342	0.0292227	1.0 Lipoamide_c + 1.0 2__alpha_Hydroxyethyl_thiamine_diphosphate_c = 1.0 Thiamin_diphosphate_c + 1.0 S_Acetyldihydrolipoamide_c
rxn01678	0.0292227	1.0 dUDP_c + 1.0 ATP_c = 1.0 dUTP_c + 1.0 ADP_c
rxn01673	0.0292227	1.0 ATP_c + 1.0 dCDP_c = 1.0 ADP_c + 1.0 dCTP_c
rxn01512	0.0292227	1.0 dTDP_c + 1.0 ATP_c = 1.0 dTTP_c + 1.0 ADP_c
rxn01353	0.0292227	1.0 dGDP_c + 1.0 ATP_c = 1.0 dGTP_c + 1.0 ADP_c
rxn01343	0.0292227	1.0 Sedoheptulose_7_phosphate_c + 1.0 ATP_c = 1.0 Sedoheptulose_1_7_bisphosphate_c + 1.0 ADP_c
rxn00839	0.0292227	1.0 dADP_c + 1.0 ATP_c = 1.0 dATP_c + 1.0 ADP_c
rxn00799	0.0292227	1.0 _S__Malate_c = 1.0 H2O_c + 1.0 Fumarate_c
rxn00515	0.0292227	1.0 ATP_c + 1.0 IDP_c = 1.0 ADP_c + 1.0 ITP_c
rxn00058	0.0292227	4.0 H__c + 4.0 Ferrocytochrome_c_c + 1.0 Oxygen_c = 2.0 H2O_c + 4.0 Ferricytochrome_c_c
rxn00634	0.0286668	1.0 NAD__c + 1.0 D_Sorbitol_c = 1.0 H__c + 1.0 NADH_c + 1.0 D_Fructose_c
rxn00274	0.0280324	1.0 Acetyl_CoA_c + 1.0 Glycine_c = 1.0 L_2_Amino_3_oxobutanoic_acid_c + 1.0 CoA_c
rxn00992	0.0277483	1.0 NAD__c + 1.0 _R__3_Hydroxybutanoate_c = 1.0 H__c + 1.0 NADH_c + 1.0 Acetoacetate_c
rxn01121	0.0274693	1.0 D_Gluconic_acid_c = 1.0 H2O_c + 1.0 2_Dehydro_3_deoxy_D_gluconate_c
rxn05494	0.0273713	1.0 D_Alanine_e + 1.0 H__e = 1.0 D_Alanine_c + 1.0 H__c
rxn01122	0.0272535	1.0 D_Altronate_c = 1.0 H2O_c + 1.0 2_Dehydro_3_deoxy_D_gluconate_c
rxn00702	0.0271978	1.0 CTP_c + 1.0 D_Glucose_1_phosphate_c = 1.0 CDP_glucose_c + 1.0 Diphosphate_c
t_cpd00550	0.0267657	1.0 D_Serine_e + 1.0 H__e = 1.0 H__c + 1.0 D_Serine_c
t_cpd00117	0.0267657	1.0 D_Alanine_e + 1.0 H__e = 1.0 D_Alanine_c + 1.0 H__c
rxn01642	0.0267146	1.0 H2O_c + 1.0 4_Imidazolone_5_propanoate_c = 1.0 N_Formimino_L_glutamate_c
rxn05437	0.0266889	1.0 H__c + 1.0 NADH_c + 1.0 12_methyl_trans_tetra_dec_2_enoyl_ACP_c = 1.0 NAD__c + 1.0 12_methyl_tetra_decanoyl_ACP_c
rxn00159	0.026582	1.0 NAD__c + 1.0 _S__Malate_c = 1.0 Pyruvate_c + 1.0 CO2_c + 1.0 NADH_c
rxn01029	0.026536	1.0 Agmatine_c + 1.0 H2O_c = 1.0 N_Carbamoylputrescine_c + 1.0 NH3_c
rxn00853	0.026536	1.0 N_Carbamoylputrescine_c + 2.0 H__c + 1.0 H2O_c = 1.0 Putrescine_c + 1.0 CO2_c + 1.0 NH3_c
rxn04385	0.026393	1.0 H__c + 1.0 L_Threonine_O_3_phosphate_c = 1.0 D_1_Aminopropan_2_ol_O_phosphate_c + 1.0 CO2_c
rxn02168	0.026328	1.0 _R__3_Hydroxybutanoyl_CoA_c = 1.0 H2O_c + 1.0 Crotonoyl_CoA_c
rxn01292	0.0258011	1.0 L_Arabinose_c = 1.0 L_Ribulose_c
rxn05179	0.0255276	1.0 H2O_c + 1.0 L_Isoleucine_e + 1.0 ATP_c = 1.0 H__c + 1.0 Orthophosphate_c + 1.0 L_Isoleucine_c + 1.0 ADP_c
t_cpd00080	0.0252781	1.0 H2O_c + 1.0 ATP_c + 1.0 sn_Glycerol_3_phosphate_e = 1.0 sn_Glycerol_3_phosphate_c + 1.0 Orthophosphate_c + 1.0 ADP_c + 1.0 H__c
rxn01640	0.025236	1.0 H2O_c + 1.0 N_Formimino_L_glutamate_c = 1.0 N_Formyl_L_glutamate_c + 1.0 NH3_c
rxn01504	0.0250726	1.0 _S__3_Hydroxy_3_methylglutaryl_CoA_c = 1.0 3_Methylglutaconyl_CoA_c + 1.0 H2O_c
rxn01316	0.02489	1.0 H2O_c + 1.0 Phosphoenolpyruvate_c + 1.0 N_Acetyl_D_mannosamine_c = 1.0 H__c + 1.0 Orthophosphate_c + 1.0 N_Acetylneuraminate_c
rxn00827	0.02489	1.0 CTP_c + 1.0 N_Acetylneuraminate_c = 1.0 Diphosphate_c + 1.0 CMP_N_acetylneuraminate_c
rxn00471	0.0244939	1.0 L_Ornithine_c = 1.0 H__c + 1.0 L_Proline_c + 1.0 NH3_c
rxn01986	0.023946	1.0 2_Deoxy_D_ribose_1_phosphate_c = 1.0 2_Deoxy_D_ribose_5_phosphate_c
rxn01508	0.023946	1.0 Deoxyadenosine_c + 1.0 ATP_c = 1.0 dAMP_c + 1.0 ADP_c
rxn01423	0.023946	1.0 2_Oxoglutarate_c + 1.0 L_2_Aminoadipate_c = 1.0 L_Glutamate_c + 1.0 2_Oxoadipate_c
rxn00914	0.023946	1.0 ATP_c + 1.0 Guanosine_c = 1.0 GMP_c + 1.0 ADP_c
rxn00778	0.023946	1.0 alpha_D_Ribose_1_phosphate_c = 1.0 D_Ribose_5_phosphate_c
rxn12206	0.023946	1.0 H__c + 1.0 Malonate_c = 1.0 CO2_c + 1.0 Acetate_c
rxn01709	0.023946	1.0 Propane_1_2_diol_c = 1.0 Propanal_c + 1.0 H2O_c
rxn03159	0.023946	1.0 UDP_2_3_bis_3_hydroxytetradecanoyl_glucosamine_c + 1.0 2_3_Bis_3_hydroxytetradecanoyl__beta_D_glucosaminyl_1_phosphate_c = 1.0 UDP_c + 1.0 2_3_2__3__Tetrakis_3_hydroxytetradecanoyl__D_glucosaminyl_1_6_beta__D_glucosamine_1_phosphate_c
rxn01840	0.023946	1.0 NAD__c + 1.0 H2O_c + 1.0 Phenylacetaldehyde_c = 1.0 H__c + 1.0 NADH_c + 1.0 Phenyl_acetate_c
rxn01277	0.023946	1.0 D_Gluconic_acid_c + 1.0 NADP__c = 1.0 H__c + 1.0 NADPH_c + 1.0 2_Keto_D_gluconic_acid_c
rxn01117	0.023946	1.0 D_Arabinose_5_phosphate_c = 1.0 D_Ribulose_5_phosphate_c
rxn00779	0.023946	1.0 H2O_c + 1.0 D_Glyceraldehyde_3_phosphate_c + 1.0 NADP__c = 2.0 H__c + 1.0 NADPH_c + 1.0 3_Phospho_D_glycerate_c
rxn00638	0.023946	1.0 GDP_mannose_c + 2.0 NAD__c + 1.0 H2O_c = 3.0 H__c + 2.0 NADH_c + 1.0 GDP_D_mannuronate_c
t_cpd03279	0.023946	1.0 Deoxyinosine_e + 1.0 H__e = 1.0 H__c + 1.0 Deoxyinosine_c
t_cpd00654	0.023946	1.0 Deoxycytidine_e + 1.0 H__e = 1.0 H__c + 1.0 Deoxycytidine_c
t_cpd00652	0.023946	1.0 D_Galactarate_e + 1.0 H__e = 1.0 H__c + 1.0 D_Galactarate_c
t_cpd00609	0.023946	1.0 D_Glucarate_e + 1.0 H__e = 1.0 H__c + 1.0 D_Glucarate_c
t_cpd00516	0.023946	1.0 H2O_c + 1.0 meso_2_6_Diaminoheptanedioate_e + 1.0 ATP_c = 1.0 H__c + 1.0 Orthophosphate_c + 1.0 meso_2_6_Diaminoheptanedioate_c + 1.0 ADP_c
t_cpd00438	0.023946	1.0 Deoxyadenosine_e + 1.0 H__e = 1.0 H__c + 1.0 Deoxyadenosine_c
t_cpd00412	0.023946	1.0 Deoxyuridine_e + 1.0 H__e = 1.0 H__c + 1.0 Deoxyuridine_c
t_cpd00367	0.023946	1.0 Cytidine_e + 1.0 H__e = 1.0 H__c + 1.0 Cytidine_c
t_cpd00277	0.023946	1.0 Deoxyguanosine_e + 1.0 H__e = 1.0 H__c + 1.0 Deoxyguanosine_c
t_cpd00249	0.023946	1.0 Uridine_e + 1.0 H__e = 1.0 H__c + 1.0 Uridine_c
t_cpd00246	0.023946	1.0 Inosine_e + 1.0 H__e = 1.0 H__c + 1.0 Inosine_c
t_cpd00184	0.023946	1.0 Thymidine_e + 1.0 H__e = 1.0 Thymidine_c + 1.0 H__c
t_cpd00182	0.023946	1.0 Adenosine_e + 1.0 H__e = 1.0 H__c + 1.0 Adenosine_c
t_cpd00041	0.023946	1.0 L_Aspartate_e + 1.0 H__e = 1.0 H__c + 1.0 L_Aspartate_c
rxn12008	0.023946	1.0 all_trans_Heptaprenyl_diphosphate_c + 1.0 Isopentenyl_diphosphate_c = 1.0 Diphosphate_c + 1.0 all_trans_Octaprenyl_diphosphate_c
rxn10180	0.023946	1.0 Sodium_e + 1.0 Pantothenate_e = 1.0 Pantothenate_c + 1.0 Sodium_c
rxn10052	0.023946	1.0 H__c + 1.0 AMP_c + 1.0 Triphosphate_c = 1.0 Diphosphate_c + 1.0 ADP_c
rxn09688	0.023946	1.0 Deoxyguanosine_e + 1.0 H__e = 1.0 H__c + 1.0 Deoxyguanosine_c
rxn09687	0.023946	1.0 Deoxyinosine_e + 1.0 H__e = 1.0 H__c + 1.0 Deoxyinosine_c
rxn09685	0.023946	1.0 Deoxyuridine_e + 1.0 H__e = 1.0 H__c + 1.0 Deoxyuridine_c
rxn05572	0.023946	1.0 D_Glucarate_e + 1.0 H__e = 1.0 H__c + 1.0 D_Glucarate_c
rxn05565	0.023946	1.0 D_Galactarate_e + 1.0 H__e = 1.0 H__c + 1.0 D_Galactarate_c
rxn05564	0.023946	1.0 4_Aminobutanoate_e + 1.0 H__e = 1.0 H__c + 1.0 4_Aminobutanoate_c
rxn05318	0.023946	1.0 Adenosine_e + 1.0 H__e = 1.0 H__c + 1.0 Adenosine_c
rxn05317	0.023946	1.0 Deoxyadenosine_e + 1.0 H__e = 1.0 H__c + 1.0 Deoxyadenosine_c
rxn05316	0.023946	1.0 Inosine_e + 1.0 H__e = 1.0 H__c + 1.0 Inosine_c
rxn05312	0.023946	1.0 H__c + 1.0 Orthophosphate_c = 1.0 Orthophosphate_e + 1.0 H__e
rxn05217	0.023946	1.0 L_Aspartate_e + 1.0 H__e = 1.0 H__c + 1.0 L_Aspartate_c
rxn05205	0.023946	1.0 Deoxycytidine_e + 1.0 H__e = 1.0 H__c + 1.0 Deoxycytidine_c
rxn05200	0.023946	1.0 Thymidine_e + 1.0 H__e = 1.0 Thymidine_c + 1.0 H__c
rxn05199	0.023946	1.0 Uridine_e + 1.0 H__e = 1.0 H__c + 1.0 Uridine_c
rxn05198	0.023946	1.0 Cytidine_e + 1.0 H__e = 1.0 H__c + 1.0 Cytidine_c
rxn04938	0.023946	1.0 S__Hydroxymethyl_glutathione_c + 1.0 NADP__c = 1.0 H__c + 1.0 S_Formylglutathione_c + 1.0 NADPH_c
rxn04139	0.023946	1.0 2_Octaprenyl_3_methyl_6_methoxy_1_4_benzoquinone_c + 1.0 NADPH_c + 1.0 Oxygen_c = 1.0 H2O_c + 1.0 NADP__c + 1.0 2_Octaprenyl_3_methyl_5_hydroxy_6_methoxy_1_4_benzoquinone_c
rxn02346	0.023946	1.0 Pyruvate_c + 1.0 2_Hydroxy_3_oxopropanoate_c = 1.0 2_Dehydro_3_deoxy_D_glucarate_c
rxn01990	0.023946	1.0 5_Dehydro_4_deoxy_D_glucarate_c = 1.0 Pyruvate_c + 1.0 2_Hydroxy_3_oxopropanoate_c
rxn01830	0.023946	1.0 H2O_c + 1.0 L_Arabinono_1_4_lactone_c = 1.0 H__c + 1.0 L_Arabinonate_c
rxn01517	0.023946	1.0 ATP_c + 1.0 dUMP_c = 1.0 dUDP_c + 1.0 ADP_c
rxn01127	0.023946	1.0 dAMP_c + 1.0 ATP_c = 1.0 dADP_c + 1.0 ADP_c
rxn00856	0.023946	1.0 Putrescine_c + 1.0 2_Oxoglutarate_c = 1.0 L_Glutamate_c + 1.0 4_Aminobutyraldehyde_c
rxn00283	0.023946	1.0 L_Alanine_c = 1.0 D_Alanine_c
rxn00097	0.023946	1.0 AMP_c + 1.0 ATP_c = 2.0 ADP_c
rxn00338	0.0238673	1.0 L_Aspartate_c + 1.0 Oxygen_c = 1.0 H2O2_c + 1.0 Iminoaspartate_c + 1.0 H__c
rxn00331	0.0238492	1.0 _3S__3_Carboxy_3_hydroxypropanoyl_CoA_c = 1.0 Acetyl_CoA_c + 1.0 Glyoxylate_c
rxn05461	0.0231308	1.0 3_Oxooctodecanoyl_ACP_c + 1.0 H__c + 1.0 NADPH_c = 1.0 3_Hydroxyoctodecanoyl_ACP_c + 1.0 NADP__c
rxn05430	0.0231308	1.0 H__c + 1.0 NADPH_c + 1.0 14_methyl_3_oxo_pentadecanoyl_ACP_c = 1.0 14_methyl_3_hydroxy_pentadecanoyl_ACP_c + 1.0 NADP__c
rxn05426	0.0231308	1.0 12_methyl_3_oxo_tridecanoyl_ACP_c + 1.0 NADPH_c + 1.0 H__c = 1.0 12_methyl_3_hydroxy_tridecanoyl_ACP_c + 1.0 NADP__c
rxn05422	0.0231308	1.0 H__c + 1.0 NADPH_c + 1.0 10_methyl_3_oxo_undecanoyl_ACP_c = 1.0 10_methyl_3_hydroxy_undecanoyl_ACP_c + 1.0 NADP__c
rxn05418	0.0231308	1.0 H__c + 1.0 NADPH_c + 1.0 8_methyl_3_oxo_nonanoyl_ACP_c = 1.0 8_methyl_3_hydroxy_nonanoyl_ACP_c + 1.0 NADP__c
rxn05414	0.0231308	1.0 H__c + 1.0 NADPH_c + 1.0 6_methyl_3_oxo_heptanoyl_ACP_c = 1.0 6_methyl_3_hydroxy_heptanoyl_ACP_c + 1.0 NADP__c
rxn05410	0.0231308	1.0 H__c + 1.0 NADPH_c + 1.0 4_methyl_3_oxo_pentanoyl_ACP_c = 1.0 4_methyl_3_hydroxy_pentanoyl_ACP_c + 1.0 NADP__c
rxn05342	0.0231308	1.0 _3R__3_Hydroxytetradecanoyl__acyl_carrier_protein__c + 1.0 NADP__c = 1.0 3_Oxotetradecanoyl__acp__c + 1.0 H__c + 1.0 NADPH_c
rxn05341	0.0231308	1.0 _3R__3_Hydroxyoctanoyl__acyl_carrier_protein__c + 1.0 NADP__c = 1.0 H__c + 1.0 NADPH_c + 1.0 3_Oxooctanoyl__acp__c
rxn05340	0.0231308	1.0 _R__3_Hydroxydodecanoyl__acp__c + 1.0 NADP__c = 1.0 H__c + 1.0 3_Oxododecanoyl__acp__c + 1.0 NADPH_c
rxn05339	0.0231308	1.0 NADP__c + 1.0 _3R__3_Hydroxybutanoyl__acyl_carrier_protein__c = 1.0 H__c + 1.0 NADPH_c + 1.0 Acetoacetyl__acp__c
rxn05338	0.0231308	1.0 _3R__3_Hydroxydecanoyl__acyl_carrier_protein__c + 1.0 NADP__c = 1.0 H__c + 1.0 3_Oxodecanoyl__acp__c + 1.0 NADPH_c
rxn05337	0.0231308	1.0 _R__3_Hydroxyhexanoyl__acp__c + 1.0 NADP__c = 1.0 H__c + 1.0 NADPH_c + 1.0 3_Oxohexanoyl__acp__c
rxn05336	0.0231308	1.0 _3R__3_Hydroxypalmitoyl__acyl_carrier_protein__c + 1.0 NADP__c = 1.0 H__c + 1.0 3_Oxohexadecanoyl__acp__c + 1.0 NADPH_c
rxn00670	0.0230619	1.0 H__c + 1.0 Orthophosphate_c + 1.0 Propanoyl_CoA_c = 1.0 Propanoyl_phosphate_c + 1.0 CoA_c
rxn00173	0.0230619	1.0 H__c + 1.0 Orthophosphate_c + 1.0 Acetyl_CoA_c = 1.0 Acetyl_phosphate_c + 1.0 CoA_c
rxn01996	0.0229906	1.0 _R__2_Methyl_3_oxopropanoyl_CoA_c = 1.0 _S__2_Methyl_3_oxopropanoyl_CoA_c
rxn00707	0.0228224	1.0 ITP_c + 1.0 Cytidine_c = 1.0 IDP_c + 1.0 CMP_c
rxn00364	0.0228224	1.0 ATP_c + 1.0 CMP_c = 1.0 CDP_c + 1.0 ADP_c
rxn03954	0.0226552	1.0 L_Idonate_c + 1.0 NADP__c = 1.0 H__c + 1.0 NADPH_c + 1.0 5_Dehydro_D_gluconate_c
rxn00756	0.0226108	1.0 H2O_c + 1.0 Choline_sulfate_c = 1.0 Sulfate_c + 1.0 Choline_c + 1.0 H__c
rxn02518	0.022209	1.0 dITP_c + 1.0 H2O_c = 1.0 2__Deoxyinosine_5__phosphate_c + 1.0 Diphosphate_c
rxn01962	0.022209	1.0 H2O_c + 1.0 XTP_c = 1.0 Diphosphate_c + 1.0 Xanthosine_5__phosphate_c
rxn01351	0.022209	1.0 H2O_c + 1.0 dGTP_c = 1.0 Diphosphate_c + 1.0 dGMP_c
rxn00514	0.022209	1.0 H2O_c + 1.0 ITP_c = 1.0 Diphosphate_c + 1.0 IMP_c
rxn00463	0.022209	1.0 H2O_c + 1.0 UTP_c = 1.0 UMP_c + 1.0 Diphosphate_c
rxn00301	0.022209	1.0 H2O_c + 1.0 GTP_c = 1.0 Diphosphate_c + 1.0 GMP_c
rxn00183	0.022209	1.0 NAD__c + 1.0 H2O_c + 1.0 L_Glutamate_5_semialdehyde_c = 2.0 H__c + 1.0 L_Glutamate_c + 1.0 NADH_c
rxn10014	0.0221996	1.0 trans_Tetradec_2_enoyl_CoA_c + 1.0 H__c + 1.0 NADH_c = 1.0 NAD__c + 1.0 Tetradecanoyl_CoA_c
rxn10013	0.0221996	1.0 H__c + 1.0 NADH_c + 1.0 2_trans_Dodecenoyl_CoA_c = 1.0 NAD__c + 1.0 Lauroyl_CoA_c
rxn10012	0.0221996	1.0 H__c + 1.0 NADH_c + 1.0 trans_Dec_2_enoyl_CoA_c = 1.0 NAD__c + 1.0 Decanoyl_CoA_c
rxn10010	0.0221996	1.0 H__c + 1.0 trans_Hex_2_enoyl_CoA_c + 1.0 NADH_c = 1.0 NAD__c + 1.0 Hexanoyl_CoA_c
rxn00206	0.0212205	2.0 O2___c = 1.0 H2O2_c + 1.0 Oxygen_c
rxn02925	0.0208914	1.0 2_Methyl_3_oxopropanoate_c + 1.0 L_Alanine_c = 1.0 Pyruvate_c + 1.0 L_3_Amino_isobutanoate_c
rxn05335	0.0208064	1.0 _3R__3_Hydroxytetradecanoyl__acyl_carrier_protein__c = 1.0 trans_Tetradec_2_enoyl__acp__c + 1.0 H2O_c
rxn05333	0.0208064	1.0 _3R__3_Hydroxydecanoyl__acyl_carrier_protein__c = 1.0 trans_Dec_2_enoyl__acp__c + 1.0 H2O_c
rxn05331	0.0208064	1.0 _R__3_Hydroxydodecanoyl__acp__c = 1.0 H2O_c + 1.0 trans_Dodec_2_enoyl__acp__c
rxn01972	0.0207171	1.0 H2O_c + 1.0 N6_Acetyl_LL_2_6_diaminoheptanedioate_c = 1.0 Acetate_c + 1.0 LL_2_6_Diaminoheptanedioate_c
rxn02883	0.0199575	1.0 2_4_Dihydroxyhept_2_enedioate_c = 1.0 H2O_c + 1.0 2_Oxohept_3_enedioate_c
rxn02004	0.0199155	1.0 H2O_c + 1.0 alpha_alpha__Trehalose_6_phosphate_c = 1.0 alpha_alpha_Trehalose_c + 1.0 H__c + 1.0 Orthophosphate_c
rxn01842	0.0197986	1.0 CoA_c + 1.0 Phenyl_acetate_c + 1.0 ATP_c = 1.0 Phenylacetyl_CoA_c + 1.0 Diphosphate_c + 1.0 AMP_c
rxn02344	0.0197748	1.0 _3S__3_6_Diaminohexanoate_c = 1.0 _3S_5S__3_5_Diaminohexanoate_c
rxn01819	0.0195781	1.0 H2O_c + 1.0 Nomega_Nomega__Dimethyl_L_arginine_c = 1.0 L_Citrulline_c + 1.0 Dimethylamine_c
rxn09996	0.0195761	45.0 UDP_glucuronate_c + 45.0 UDP_N_acetyl_D_galactosamine_c = 45.0 UMP_c + 45.0 UDP_c + 1.0 teichuronic_acid__GlcA___GalNac__45_repeating_unit__c + 45.0 H__c
rxn01746	0.0194025	1.0 H2O_c + 1.0 Allantoate_c = 1.0 Urea_c + 1.0 ____Ureidoglycolate_c
rxn05165	0.0193995	1.0 H2O_c + 1.0 L_Proline_e + 1.0 ATP_c = 1.0 H__c + 1.0 Orthophosphate_c + 1.0 L_Proline_c + 1.0 ADP_c
rxn01021	0.0192027	1.0 H2O_c + 1.0 5__Methylthioadenosine_c = 1.0 5_Methylthio_D_ribose_c + 1.0 Adenine_c
rxn00143	0.0192027	1.0 H2O_c + 1.0 S_Adenosyl_L_homocysteine_c = 1.0 S_Ribosyl_L_homocysteine_c + 1.0 Adenine_c
rxn08655	0.0189732	1.0 Glycolate_c + 1.0 Ubiquinone_8_c = 1.0 Glyoxylate_c + 1.0 Ubiquinol_8_c
rxn01672	0.0189692	1.0 H__c + 1.0 H2O_c + 1.0 dCTP_c = 1.0 dUTP_c + 1.0 NH3_c
rxn00407	0.0189692	1.0 CTP_c + 1.0 H__c + 1.0 H2O_c = 1.0 UTP_c + 1.0 NH3_c
t_cpd00540	0.0189241	1.0 Betaine_e + 1.0 H2O_c + 1.0 ATP_c = 1.0 H__c + 1.0 Orthophosphate_c + 1.0 ADP_c + 1.0 Betaine_c
rxn03951	0.0188758	1.0 NAD__c + 1.0 O_Phospho_4_hydroxy_L_threonine_c = 1.0 H__c + 1.0 NADH_c + 1.0 2_Amino_3_oxo_4_phosphonooxybutyrate_c
rxn01102	0.0185842	1.0 D_Glycerate_c + 1.0 ATP_c = 1.0 ADP_c + 1.0 3_Phospho_D_glycerate_c
t_cpd00082	0.018528	1.0 D_Fructose_e + 1.0 Phosphoenolpyruvate_c = 1.0 Pyruvate_c + 1.0 D_Fructose_1_phosphate_c
rxn05560	0.018528	1.0 D_Fructose_e + 1.0 Phosphoenolpyruvate_c = 1.0 Pyruvate_c + 1.0 D_Fructose_1_phosphate_c
rxn01107	0.0184647	1.0 D_Glucono_1_5_lactone_c + 1.0 H2O_c = 1.0 H__c + 1.0 D_Gluconic_acid_c
rxn05505	0.0184356	1.0 ARSENOBETAINE_e + 1.0 H__e = 1.0 H__c + 1.0 ARSENOBETAINE_c
t_cpd11597	0.0184356	1.0 ARSENOBETAINE_e + 1.0 H__e = 1.0 H__c + 1.0 ARSENOBETAINE_c
rxn00763	0.0183482	1.0 NAD__c + 1.0 Glycerol_c = 1.0 H__c + 1.0 NADH_c + 1.0 D_Glyceraldehyde_c
rxn00543	0.0183482	1.0 NAD__c + 1.0 Ethanol_c = 1.0 H__c + 1.0 NADH_c + 1.0 Acetaldehyde_c
rxn00787	0.0181537	1.0 D_Tagatose_1_6_bisphosphate_c = 1.0 Glycerone_phosphate_c + 1.0 D_Glyceraldehyde_3_phosphate_c
rxn02222	0.0179927	1.0 _Indol_3_yl_acetamide_c + 1.0 H2O_c = 1.0 Indole_3_acetate_c + 1.0 NH3_c
rxn01258	0.0179155	1.0 Chorismate_c = 1.0 Isochorismate_c
rxn06586	0.0178268	1.0 3_Methylbutanoyl_CoA_c + 1.0 Dihydrolipoamide_c = 1.0 CoA_c + 1.0 _Dihydrolipoyllysine_residue__2_methylpropanoyl_transferase__S__3_methylbutanoyl_dihydrolipoyllysine_c
rxn06335	0.0178268	1.0 2_Methylbutanoyl_CoA_c + 1.0 Dihydrolipoamide_c = 1.0 CoA_c + 1.0 _Dihydrolipoyllysine_residue__2_methylpropanoyl_transferase__S__2_methylbutanoyl_dihydrolipoyllysine_c
rxn05440	0.0178051	1.0 7_methyl_trans_oct_2_enoyl_ACP_c + 1.0 NADH_c + 1.0 H__c = 1.0 NAD__c + 1.0 7_methyl_octanoyl_ACP_c
t_cpd00012	0.0177387	1.0 H__c + 1.0 Diphosphate_c = 1.0 Diphosphate_e + 1.0 H__e
rxn11268	0.0177387	1.0 H__c + 1.0 Diphosphate_c = 1.0 Diphosphate_e + 1.0 H__e
rxn01278	0.0177296	1.0 D_Gluconic_acid_c + 1.0 NADP__c = 1.0 H__c + 1.0 NADPH_c + 1.0 5_Dehydro_D_gluconate_c
rxn08657	0.0176968	1.0 Glycolate_c + 1.0 2_Demethylmenaquinone_8_c = 1.0 2_Demethylmenaquinol_8_c + 1.0 Glyoxylate_c
rxn00189	0.0174085	1.0 L_Glutamine_c + 1.0 H2O_c = 1.0 L_Glutamate_c + 1.0 NH3_c
rxn04954	0.0173188	1.0 NAD__c + 1.0 5_Methyltetrahydrofolate_c = 1.0 H__c + 1.0 5_10_Methylenetetrahydrofolate_c + 1.0 NADH_c
rxn00782	0.0171739	1.0 3_Phospho_D_glyceroyl_phosphate_c + 1.0 NADPH_c = 1.0 Orthophosphate_c + 1.0 D_Glyceraldehyde_3_phosphate_c + 1.0 NADP__c
rxn05649	0.0171472	1.0 D_Serine_e + 1.0 H__e = 1.0 H__c + 1.0 D_Serine_c
rxn00328	0.0168993	1.0 4_Hydroxy_2_oxoglutarate_c = 1.0 Pyruvate_c + 1.0 Glyoxylate_c
rxn01133	0.0167809	1.0 Acetyl_CoA_c + 1.0 Maltose_c = 1.0 Acetyl_maltose_c + 1.0 CoA_c
t_cpd00054	0.0166262	1.0 L_Serine_e + 1.0 H__e = 1.0 H__c + 1.0 L_Serine_c
rxn00184	0.0165543	1.0 H2O_c + 1.0 L_Glutamate_c + 1.0 NADP__c = 1.0 H__c + 1.0 2_Oxoglutarate_c + 1.0 NADPH_c + 1.0 NH3_c
rxn12500	0.0164385	1.0 Ubiquinone_8_c + 1.0 tricarballylate_c = 1.0 Ubiquinol_8_c + 1.0 cis_Aconitate_c
rxn02894	0.0161538	1.0 5_Methylthio_D_ribose_c + 1.0 ATP_c = 1.0 ADP_c + 1.0 S_Methyl_5_thio_D_ribose_1_phosphate_c
rxn01094	0.0159638	1.0 NAD__c + 1.0 2_3_Dihydro_2_3_dihydroxybenzoate_c = 1.0 H__c + 1.0 2_3_Dihydroxybenzoate_c + 1.0 NADH_c
rxn05168	0.0159516	1.0 H2O_c + 1.0 L_Valine_e + 1.0 ATP_c = 1.0 H__c + 1.0 Orthophosphate_c + 1.0 L_Valine_c + 1.0 ADP_c
rxn05161	0.0159516	1.0 H2O_c + 1.0 ATP_c + 1.0 L_Leucine_e = 1.0 H__c + 1.0 Orthophosphate_c + 1.0 ADP_c + 1.0 L_Leucine_c
t_cpd15606	0.0157545	1.0 H2O_c + 1.0 Gly_Tyr_e + 1.0 ATP_c = 1.0 Orthophosphate_c + 1.0 Gly_Tyr_c + 1.0 ADP_c
t_cpd15605	0.0157545	1.0 H2O_c + 1.0 Gly_Phe_e + 1.0 ATP_c = 1.0 Orthophosphate_c + 1.0 Gly_Phe_c + 1.0 ADP_c
t_cpd15604	0.0157545	1.0 H2O_c + 1.0 Gly_Leu_e + 1.0 ATP_c = 1.0 Gly_Leu_c + 1.0 Orthophosphate_c + 1.0 ADP_c
t_cpd15603	0.0157545	1.0 Gly_Cys_e + 1.0 H2O_c + 1.0 ATP_c = 1.0 Orthophosphate_c + 1.0 ADP_c + 1.0 Gly_Cys_c
t_cpd11593	0.0157545	1.0 H2O_c + 1.0 ala_L_asp_L_e + 1.0 ATP_c = 1.0 H__c + 1.0 Orthophosphate_c + 1.0 ala_L_asp_L_c + 1.0 ADP_c
t_cpd11592	0.0157545	1.0 H2O_c + 1.0 ATP_c + 1.0 gly_glu_L_e = 1.0 gly_glu_L_c + 1.0 Orthophosphate_c + 1.0 ADP_c + 1.0 H__c
t_cpd11591	0.0157545	1.0 Gly_Met_e + 1.0 H2O_c + 1.0 ATP_c = 1.0 H__c + 1.0 Orthophosphate_c + 1.0 ADP_c + 1.0 Gly_Met_c
t_cpd11590	0.0157545	1.0 H2O_c + 1.0 ATP_c + 1.0 met_L_ala_L_e = 1.0 met_L_ala_L_c + 1.0 H__c + 1.0 Orthophosphate_c + 1.0 ADP_c
t_cpd11589	0.0157545	1.0 H2O_c + 1.0 gly_asp_L_e + 1.0 ATP_c = 1.0 H__c + 1.0 Orthophosphate_c + 1.0 gly_asp_L_c + 1.0 ADP_c
t_cpd11588	0.0157545	1.0 H2O_c + 1.0 gly_pro_L_e + 1.0 ATP_c = 1.0 H__c + 1.0 gly_pro_L_c + 1.0 Orthophosphate_c + 1.0 ADP_c
t_cpd11587	0.0157545	1.0 H2O_c + 1.0 Ala_Gln_e + 1.0 ATP_c = 1.0 H__c + 1.0 Orthophosphate_c + 1.0 Ala_Gln_c + 1.0 ADP_c
t_cpd11586	0.0157545	1.0 H2O_c + 1.0 ala_L_glu_L_e + 1.0 ATP_c = 1.0 H__c + 1.0 Orthophosphate_c + 1.0 ala_L_glu_L_c + 1.0 ADP_c
t_cpd11585	0.0157545	1.0 H2O_c + 1.0 ATP_c + 1.0 L_alanylglycine_e = 1.0 L_alanylglycine_c + 1.0 H__c + 1.0 Orthophosphate_c + 1.0 ADP_c
t_cpd11584	0.0157545	1.0 H2O_c + 1.0 Ala_His_e + 1.0 ATP_c = 1.0 H__c + 1.0 Ala_His_c + 1.0 Orthophosphate_c + 1.0 ADP_c
t_cpd11583	0.0157545	1.0 H2O_c + 1.0 ATP_c + 1.0 Ala_Leu_e = 1.0 Ala_Leu_c + 1.0 H__c + 1.0 Orthophosphate_c + 1.0 ADP_c
t_cpd11582	0.0157545	1.0 H2O_c + 1.0 ala_L_Thr_L_e + 1.0 ATP_c = 1.0 H__c + 1.0 Orthophosphate_c + 1.0 ala_L_Thr_L_c + 1.0 ADP_c
t_cpd11581	0.0157545	1.0 H2O_c + 1.0 gly_asn_L_e + 1.0 ATP_c = 1.0 H__c + 1.0 Orthophosphate_c + 1.0 gly_asn_L_c + 1.0 ADP_c
t_cpd11580	0.0157545	1.0 H2O_c + 1.0 Gly_Gln_e + 1.0 ATP_c = 1.0 H__c + 1.0 Orthophosphate_c + 1.0 Gly_Gln_c + 1.0 ADP_c
t_cpd01017	0.0157545	1.0 Cys_Gly_e + 1.0 H2O_c + 1.0 ATP_c = 1.0 H__c + 1.0 Orthophosphate_c + 1.0 ADP_c + 1.0 Cys_Gly_c
rxn12851	0.0157545	1.0 H2O_c + 1.0 Gly_Tyr_e + 1.0 ATP_c = 1.0 Orthophosphate_c + 1.0 Gly_Tyr_c + 1.0 ADP_c
rxn12850	0.0157545	1.0 H2O_c + 1.0 Gly_Phe_e + 1.0 ATP_c = 1.0 Orthophosphate_c + 1.0 Gly_Phe_c + 1.0 ADP_c
rxn12849	0.0157545	1.0 H2O_c + 1.0 Gly_Leu_e + 1.0 ATP_c = 1.0 Gly_Leu_c + 1.0 Orthophosphate_c + 1.0 ADP_c
rxn12848	0.0157545	1.0 Gly_Cys_e + 1.0 H2O_c + 1.0 ATP_c = 1.0 Orthophosphate_c + 1.0 ADP_c + 1.0 Gly_Cys_c
rxn05547	0.0157545	1.0 H2O_c + 1.0 Gly_Gln_e + 1.0 ATP_c = 1.0 H__c + 1.0 Orthophosphate_c + 1.0 Gly_Gln_c + 1.0 ADP_c
rxn05546	0.0157545	1.0 H2O_c + 1.0 gly_asn_L_e + 1.0 ATP_c = 1.0 H__c + 1.0 Orthophosphate_c + 1.0 gly_asn_L_c + 1.0 ADP_c
rxn05545	0.0157545	1.0 H2O_c + 1.0 ala_L_Thr_L_e + 1.0 ATP_c = 1.0 H__c + 1.0 Orthophosphate_c + 1.0 ala_L_Thr_L_c + 1.0 ADP_c
rxn05544	0.0157545	1.0 H2O_c + 1.0 ATP_c + 1.0 Ala_Leu_e = 1.0 Ala_Leu_c + 1.0 H__c + 1.0 Orthophosphate_c + 1.0 ADP_c
rxn05543	0.0157545	1.0 H2O_c + 1.0 Ala_His_e + 1.0 ATP_c = 1.0 H__c + 1.0 Ala_His_c + 1.0 Orthophosphate_c + 1.0 ADP_c
rxn05542	0.0157545	1.0 H2O_c + 1.0 ATP_c + 1.0 L_alanylglycine_e = 1.0 L_alanylglycine_c + 1.0 H__c + 1.0 Orthophosphate_c + 1.0 ADP_c
rxn05541	0.0157545	1.0 H2O_c + 1.0 ala_L_glu_L_e + 1.0 ATP_c = 1.0 H__c + 1.0 Orthophosphate_c + 1.0 ala_L_glu_L_c + 1.0 ADP_c
rxn05540	0.0157545	1.0 H2O_c + 1.0 Ala_Gln_e + 1.0 ATP_c = 1.0 H__c + 1.0 Orthophosphate_c + 1.0 Ala_Gln_c + 1.0 ADP_c
rxn05539	0.0157545	1.0 Cys_Gly_e + 1.0 H2O_c + 1.0 ATP_c = 1.0 H__c + 1.0 Orthophosphate_c + 1.0 ADP_c + 1.0 Cys_Gly_c
rxn05538	0.0157545	1.0 H2O_c + 1.0 gly_pro_L_e + 1.0 ATP_c = 1.0 H__c + 1.0 gly_pro_L_c + 1.0 Orthophosphate_c + 1.0 ADP_c
rxn05537	0.0157545	1.0 H2O_c + 1.0 gly_asp_L_e + 1.0 ATP_c = 1.0 H__c + 1.0 Orthophosphate_c + 1.0 gly_asp_L_c + 1.0 ADP_c
rxn05536	0.0157545	1.0 H2O_c + 1.0 ATP_c + 1.0 met_L_ala_L_e = 1.0 met_L_ala_L_c + 1.0 H__c + 1.0 Orthophosphate_c + 1.0 ADP_c
rxn05535	0.0157545	1.0 Gly_Met_e + 1.0 H2O_c + 1.0 ATP_c = 1.0 H__c + 1.0 Orthophosphate_c + 1.0 ADP_c + 1.0 Gly_Met_c
rxn05534	0.0157545	1.0 H2O_c + 1.0 ATP_c + 1.0 gly_glu_L_e = 1.0 gly_glu_L_c + 1.0 Orthophosphate_c + 1.0 ADP_c + 1.0 H__c
rxn05533	0.0157545	1.0 H2O_c + 1.0 ala_L_asp_L_e + 1.0 ATP_c = 1.0 H__c + 1.0 Orthophosphate_c + 1.0 ala_L_asp_L_c + 1.0 ADP_c
rxn08669	0.0156169	1.0 H2O_c + 1.0 Glycerophosphoglycerol_c = 1.0 Glycerol_c + 1.0 sn_Glycerol_3_phosphate_c
rxn01073	0.0156169	1.0 H2O_c + 1.0 sn_glycero_3_Phosphoethanolamine_c = 1.0 sn_Glycerol_3_phosphate_c + 1.0 Ethanolamine_c
rxn00758	0.0156169	1.0 H2O_c + 1.0 sn_glycero_3_Phosphocholine_c = 1.0 Choline_c + 1.0 sn_Glycerol_3_phosphate_c
rxn00748	0.0156169	1.0 Glycerone_phosphate_c = 1.0 H__c + 1.0 Orthophosphate_c + 1.0 Methylglyoxal_c
t_cpd00573	0.0155941	1.0 L_Idonate_e + 1.0 H__e = 1.0 L_Idonate_c + 1.0 H__c
t_cpd00222	0.0155941	1.0 D_Gluconic_acid_e + 1.0 H__e = 1.0 H__c + 1.0 D_Gluconic_acid_c
rxn03445	0.0155918	1.0 O_Phospho_4_hydroxy_L_threonine_c + 1.0 2_Oxoglutarate_c = 1.0 L_Glutamate_c + 1.0 2_Oxo_3_hydroxy_4_phosphobutanoate_c
rxn01199	0.0155015	1.0 D_Xylulose_c + 1.0 ATP_c = 1.0 D_Xylulose_5_phosphate_c + 1.0 ADP_c
rxn00868	0.0151944	1.0 H__c + 1.0 NADH_c + 1.0 Crotonoyl_CoA_c = 1.0 NAD__c + 1.0 Butanoyl_CoA_c
rxn00190	0.0150908	1.0 Deamino_NAD__c + 1.0 L_Glutamine_c + 1.0 H2O_c + 1.0 ATP_c = 1.0 NAD__c + 1.0 Diphosphate_c + 1.0 L_Glutamate_c + 1.0 AMP_c
rxn10476	0.0150368	1.0 H2O_c + 1.0 Hydrogenobyrinate_a_c_diamide_c + 1.0 ATP_c + 1.0 Cobalt_c = 1.0 Cob_II_yrinate_a_c_diamide_c + 2.0 H__c + 1.0 Orthophosphate_c + 1.0 ADP_c
rxn08179	0.0150368	1.0 d_biotin_d_sulfoxide_c + 1.0 NADPH_c + 1.0 H__c = 1.0 Biotin_c + 1.0 H2O_c + 1.0 NADP__c
rxn08178	0.0150368	1.0 d_biotin_d_sulfoxide_c + 1.0 NADH_c + 1.0 H__c = 1.0 NAD__c + 1.0 Biotin_c + 1.0 H2O_c
rxn06729	0.0150368	1.0 UDP_N_acetyl_D_glucosamine_c + 1.0 _3R__3_Hydroxytetradecanoyl__acyl_carrier_protein__c = 1.0 UDP_3_O__3_hydroxytetradecanoyl__N_acetylglucosamine_c + 1.0 Acyl_carrier_protein_c
rxn00623	0.0150368	1.0 Sulfite_c + 3.0 NADPH_c + 4.0 H__c = 3.0 H2O_c + 1.0 Hydrogen_sulfide_c + 3.0 NADP__c
rxn12405	0.0150368	1.0 _R__3_Hydroxybutanoate_e = 1.0 _R__3_Hydroxybutanoate_c
rxn08783	0.0150368	1.0 _R__Lactate_c + 1.0 Ubiquinone_8_c = 1.0 Pyruvate_c + 1.0 Ubiquinol_8_c
rxn05681	0.0150368	1.0 2_Dehydro_3_deoxy_D_gluconate_e + 1.0 H__e = 1.0 H__c + 1.0 2_Dehydro_3_deoxy_D_gluconate_c
rxn05117	0.0150368	1.0 L_Aspartate_c + 1.0 NADP__c = 1.0 Iminoaspartate_c + 1.0 NADPH_c + 2.0 H__c
rxn00146	0.0150368	1.0 _R__Lactate_c + 2.0 Ferricytochrome_c_c = 1.0 Pyruvate_c + 2.0 H__c + 2.0 Ferrocytochrome_c_c
t_cpd00797	0.0150368	1.0 _R__3_Hydroxybutanoate_e = 1.0 _R__3_Hydroxybutanoate_c
t_cpd00176	0.0150368	1.0 2_Dehydro_3_deoxy_D_gluconate_e + 1.0 H__e = 1.0 H__c + 1.0 2_Dehydro_3_deoxy_D_gluconate_c
rxn00879	0.0149597	1.0 NAD__c + 1.0 myo_Inositol_c = 1.0 H__c + 1.0 NADH_c + 1.0 2_4_6_3_5_Pentahydroxycyclohexanone_c
rxn00161	0.014959	1.0 _S__Malate_c + 1.0 NADP__c = 1.0 Pyruvate_c + 1.0 CO2_c + 1.0 NADPH_c
rxn10123	0.0148518	3.0 H__c + 1.0 Menaquinone_8_c + 1.0 NADH_c = 1.0 NAD__c + 1.0 Menaquinol_8_c + 2.0 H__e
rxn05147	0.0147392	1.0 H2O_c + 1.0 D_Glucose_e + 1.0 ATP_c = 1.0 H__c + 1.0 Orthophosphate_c + 1.0 D_Glucose_c + 1.0 ADP_c
rxn05462	0.0142475	1.0 3_Hydroxyoctodecanoyl_ACP_c = 1.0 trans_Octodec_2_enoyl_ACP_c + 1.0 H2O_c
rxn05431	0.0142475	1.0 14_methyl_3_hydroxy_pentadecanoyl_ACP_c = 1.0 H2O_c + 1.0 14_methyl_trans_pentadec_2_enoyl_ACP_c
rxn05427	0.0142475	1.0 12_methyl_3_hydroxy_tridecanoyl_ACP_c = 1.0 H2O_c + 1.0 12_methyl_trans_tridec_2_enoyl_ACP_c
rxn05423	0.0142475	1.0 10_methyl_3_hydroxy_undecanoyl_ACP_c = 1.0 H2O_c + 1.0 10_methyl_trans_undec_2_enoyl_ACP_c
rxn05419	0.0142475	1.0 8_methyl_3_hydroxy_nonanoyl_ACP_c = 1.0 H2O_c + 1.0 8_methyl_trans_non_2_enoyl_ACP_c
rxn05415	0.0142475	1.0 6_methyl_3_hydroxy_heptanoyl_ACP_c = 1.0 H2O_c + 1.0 6_methyl_trans_hept_2_enoyl_ACP_c
rxn05411	0.0142475	1.0 4_methyl_3_hydroxy_pentanoyl_ACP_c = 1.0 4_methyl_trans_pent_2_enoyl_ACP_c + 1.0 H2O_c
rxn05334	0.0142475	1.0 _3R__3_Hydroxyoctanoyl__acyl_carrier_protein__c = 1.0 H2O_c + 1.0 trans_Oct_2_enoyl__acp__c
rxn05332	0.0142475	1.0 _3R__3_Hydroxypalmitoyl__acyl_carrier_protein__c = 1.0 trans_Hexadec_2_enoyl__acp__c + 1.0 H2O_c
rxn05330	0.0142475	1.0 _R__3_Hydroxyhexanoyl__acp__c = 1.0 H2O_c + 1.0 trans_Hex_2_enoyl__acp__c
rxn05329	0.0142475	1.0 _3R__3_Hydroxybutanoyl__acyl_carrier_protein__c = 1.0 But_2_enoyl__acyl_carrier_protein__c + 1.0 H2O_c
t_cpd00010	0.0142165	1.0 CoA_e = 1.0 CoA_c
rxn10344	0.0142165	1.0 H2O_c + 1.0 ATP_c + 1.0 Lead_c = 1.0 Lead_e + 1.0 H__c + 1.0 Orthophosphate_c + 1.0 ADP_c
rxn10343	0.0142165	1.0 Mercury_2___c + 1.0 H2O_c + 1.0 ATP_c = 1.0 H__c + 1.0 Orthophosphate_c + 1.0 ADP_c + 1.0 Mercury_2___e
rxn09177	0.0142165	1.0 CTP_c + 1.0 D_4__Phosphopantothenate_c + 1.0 L_Cysteine_c = 1.0 _R__4__Phosphopantothenoyl_L_cysteine_c + 1.0 Diphosphate_c + 1.0 CMP_c
rxn05528	0.0142165	1.0 H2O_c + 1.0 Copper2_c + 1.0 ATP_c = 1.0 H__c + 1.0 Orthophosphate_c + 1.0 Copper2_e + 1.0 ADP_c
rxn05516	0.0142165	1.0 H2O_c + 1.0 Cadmium_c + 1.0 ATP_c = 1.0 H__c + 1.0 Orthophosphate_c + 1.0 Cadmium_e + 1.0 ADP_c
rxn00409	0.0142165	1.0 CDP_c + 1.0 ATP_c = 1.0 CTP_c + 1.0 ADP_c
t_cpd03696	0.0142165	1.0 Arbutin_e + 1.0 Phosphoenolpyruvate_c = 1.0 Pyruvate_c + 1.0 Arbutin_6_phosphate_c
t_cpd01030	0.0142165	1.0 Salicin_e + 1.0 Phosphoenolpyruvate_c = 1.0 Pyruvate_c + 1.0 Salicin_6_phosphate_c
rxn06077	0.0142165	1.0 H2O_c + 1.0 trdox_c + 1.0 L_Methionine_c = 1.0 trdrd_c + 1.0 L_Methionine_S_oxide_c
rxn00237	0.0142165	1.0 GDP_c + 1.0 ATP_c = 1.0 GTP_c + 1.0 ADP_c
rxn00117	0.0142165	1.0 UDP_c + 1.0 ATP_c = 1.0 UTP_c + 1.0 ADP_c
t_cpd04097	0.0142165	1.0 H2O_c + 1.0 ATP_c + 1.0 Lead_c = 1.0 Lead_e + 1.0 H__c + 1.0 Orthophosphate_c + 1.0 ADP_c
t_cpd00531	0.0142165	1.0 Mercury_2___c + 1.0 H2O_c + 1.0 ATP_c = 1.0 H__c + 1.0 Orthophosphate_c + 1.0 ADP_c + 1.0 Mercury_2___e
rxn00408	0.0142165	1.0 CTP_c + 1.0 H2O_c = 1.0 CDP_c + 1.0 H__c + 1.0 Orthophosphate_c
rxn09989	0.0142165	5.0 H2O_c + 1.0 Dextrin_c = 6.0 D_Glucose_c
rxn08936	0.0142165	1.0 H2O_c + 1.0 Maltoheptaose_c = 1.0 Maltohexaose_c + 1.0 D_Glucose_c
rxn08935	0.0142165	1.0 Maltohexaose_c + 1.0 H2O_c = 1.0 Maltopentaose_c + 1.0 D_Glucose_c
rxn08934	0.0142165	1.0 H2O_c + 1.0 Maltopentaose_c = 1.0 D_Glucose_c + 1.0 Maltotetraose_c
rxn08933	0.0142165	1.0 H2O_c + 1.0 Maltotetraose_c = 1.0 Maltotriose_c + 1.0 D_Glucose_c
rxn05746	0.0142165	1.0 Maltotriose_c + 1.0 H2O_c = 1.0 D_Glucose_c + 1.0 Maltose_c
rxn05647	0.0142165	1.0 Salicin_e + 1.0 Phosphoenolpyruvate_c = 1.0 Pyruvate_c + 1.0 Salicin_6_phosphate_c
rxn05501	0.0142165	1.0 Arbutin_e + 1.0 Phosphoenolpyruvate_c = 1.0 Pyruvate_c + 1.0 Arbutin_6_phosphate_c
rxn01385	0.0142165	1.0 NAD__c + 1.0 Xylitol_c = 1.0 H__c + 1.0 NADH_c + 1.0 D_Xylulose_c
rxn01259	0.0142165	1.0 H2O_c + 1.0 Isomaltose_c = 2.0 D_Glucose_c
rxn00575	0.0142165	1.0 Sucrose_c + 1.0 H2O_c = 1.0 D_Glucose_c + 1.0 D_Fructose_c
rxn00440	0.0142165	1.0 Thiamine_c + 1.0 ATP_c = 1.0 Thiamin_diphosphate_c + 1.0 AMP_c
rxn05171	0.0142084	1.0 H2O_c + 1.0 Nitrate_e + 1.0 ATP_c = 1.0 H__c + 1.0 Orthophosphate_c + 1.0 Nitrate_c + 1.0 ADP_c
rxn06076	0.0140535	1.0 CDP_c + 1.0 trdrd_c = 1.0 H2O_c + 1.0 trdox_c + 1.0 dCDP_c
rxn00510	0.0137515	1.0 NAD__c + 1.0 H2O_c + 1.0 N6__L_1_3_Dicarboxypropyl__L_lysine_c = 1.0 L_Lysine_c + 1.0 2_Oxoglutarate_c + 1.0 NADH_c + 1.0 H__c
rxn00836	0.0136417	1.0 5_Phospho_alpha_D_ribose_1_diphosphate_c + 1.0 Hypoxanthine_c = 1.0 Diphosphate_c + 1.0 IMP_c
rxn00883	0.0136173	1.0 H2O_c + 1.0 1D_myo_Inositol_3_phosphate_c = 1.0 H__c + 1.0 Orthophosphate_c + 1.0 myo_Inositol_c
rxn00882	0.0136173	1.0 H2O_c + 1.0 myo_Inositol_4_phosphate_c = 1.0 H__c + 1.0 Orthophosphate_c + 1.0 myo_Inositol_c
rxn00881	0.0136173	1.0 H2O_c + 1.0 Inositol_1_phosphate_c = 1.0 H__c + 1.0 Orthophosphate_c + 1.0 myo_Inositol_c
rxn04712	0.0135441	1.0 Fumarate_c + 1.0 2_Methylnaphthalene_c = 1.0 Naphthyl_2_methyl_succinic_acid_c
rxn04454	0.0135441	1.0 Isochorismate_c = 1.0 Pyruvate_c + 1.0 Salicylate_c
rxn03055	0.0133818	1.0 NAD__c + 1.0 H2O_c + 1.0 2_Hydroxy_5_carboxymethylmuconate_semialdehyde_c = 2.0 H__c + 1.0 NADH_c + 1.0 5_Carboxymethyl_2_hydroxymuconate_c
rxn00423	0.0132513	1.0 Acetyl_CoA_c + 1.0 L_Serine_c = 1.0 CoA_c + 1.0 O_Acetyl_L_serine_c
rxn05578	0.0131466	1.0 H__e + 1.0 sn_Glycerol_3_phosphate_e = 1.0 sn_Glycerol_3_phosphate_c + 1.0 H__c
rxn03869	0.0127373	1.0 H2O_c + 1.0 Benzamide_c = 1.0 NH3_c + 1.0 Benzoate_c
rxn03839	0.0127373	1.0 H2O_c + 1.0 Acrylamide_c = 1.0 Propenoate_c + 1.0 NH3_c
rxn02275	0.0127373	1.0 4_Guanidinobutanamide_c + 1.0 H2O_c = 1.0 4_Guanidinobutanoate_c + 1.0 NH3_c
rxn01843	0.0127373	1.0 H__c + 1.0 H2O_c + 1.0 2_Phenylacetamide_c = 1.0 Phenyl_acetate_c + 1.0 NH3_c
rxn00231	0.0127373	1.0 H2O_c + 1.0 Acetamide_c = 1.0 NH3_c + 1.0 Acetate_c
t_cpd00305	0.012685	1.0 H2O_c + 1.0 Thiamine_e + 1.0 ATP_c = 1.0 H__c + 1.0 Orthophosphate_c + 1.0 Thiamine_c + 1.0 ADP_c
rxn05439	0.012642	1.0 H__c + 1.0 5_methyl_trans_hex_2_enoyl_ACP_c + 1.0 NADH_c = 1.0 NAD__c + 1.0 5_methyl_hexanoyl_ACP_c
rxn00278	0.0124428	1.0 L_Alanine_c + 1.0 NAD__c + 1.0 H2O_c = 1.0 Pyruvate_c + 1.0 H__c + 1.0 NADH_c + 1.0 NH3_c
rxn00606	0.0124224	1.0 H2O_c + 1.0 alpha_alpha__Trehalose_6_phosphate_c = 1.0 D_Glucose_c + 1.0 D_Glucose_6_phosphate_c
rxn00127	0.0124224	1.0 H__c + 1.0 S_Adenosyl_L_methionine_c = 1.0 S_Adenosylmethioninamine_c + 1.0 CO2_c
t_cpd00208	0.0122063	1.0 H2O_c + 1.0 Lactose_e + 1.0 ATP_c = 1.0 H__c + 1.0 Orthophosphate_c + 1.0 Lactose_c + 1.0 ADP_c
rxn05598	0.0122063	1.0 H2O_c + 1.0 Lactose_e + 1.0 ATP_c = 1.0 H__c + 1.0 Orthophosphate_c + 1.0 Lactose_c + 1.0 ADP_c
rxn00539	0.0118597	1.0 Ethanolamine_c = 1.0 Acetaldehyde_c + 1.0 NH3_c
rxn00178	0.0118573	2.0 Acetyl_CoA_c = 1.0 CoA_c + 1.0 Acetoacetyl_CoA_c
rxn01537	0.0118154	1.0 H2O_c + 1.0 Thiamine_c = 1.0 H__c + 1.0 5__2_Hydroxyethyl__4_methylthiazole_c + 1.0 4_Amino_5_hydroxymethyl_2_methylpyrimidine_c
rxn01203	0.0117202	1.0 2_4_Dihydroxyhept_2_enedioate_c = 1.0 Pyruvate_c + 1.0 Succinate_semialdehyde_c
rxn01169	0.0116316	1.0 beta_D_Glucose_c + 1.0 ATP_c = 1.0 beta_D_Glucose_6_phosphate_c + 1.0 ADP_c
rxn05202	0.01143	1.0 Xanthine_e + 1.0 H__e = 1.0 Xanthine_c + 1.0 H__c
t_cpd00309	0.01143	1.0 Xanthine_e + 1.0 H__e = 1.0 Xanthine_c + 1.0 H__c
rxn00762	0.011305	1.0 NAD__c + 1.0 Glycerol_c = 1.0 H__c + 1.0 NADH_c + 1.0 Glycerone_c
rxn01800	0.0112856	1.0 H__c + 1.0 H2O_c + 1.0 Deoxycytidine_c = 1.0 Deoxyuridine_c + 1.0 NH3_c
rxn05297	0.0111302	1.0 L_Glutamate_e + 1.0 H__e = 1.0 H__c + 1.0 L_Glutamate_c
rxn05582	0.0110591	1.0 Glycine_e + 1.0 H__e = 1.0 H__c + 1.0 Glycine_c
t_cpd08306	0.0110584	1.0 Butyro_betaine_e + 1.0 H2O_c + 1.0 ATP_c = 1.0 H__c + 1.0 Orthophosphate_c + 1.0 Butyro_betaine_c + 1.0 ADP_c
t_cpd08305	0.0110584	1.0 H2O_c + 1.0 Crotono_betaine_e + 1.0 ATP_c = 1.0 H__c + 1.0 Orthophosphate_c + 1.0 Crotono_betaine_c + 1.0 ADP_c
rxn10136	0.0110584	1.0 L_Glutamate_e + 1.0 4_Aminobutanoate_c = 1.0 L_Glutamate_c + 1.0 4_Aminobutanoate_e
rxn05740	0.0110584	1.0 H__c + 1.0 Orthophosphate_c + 1.0 Glycogen_c = 1.0 glycogen_n_1__c + 1.0 D_Glucose_1_phosphate_c
rxn05504	0.0110584	1.0 H2O_c + 1.0 ARSENOBETAINE_e + 1.0 ATP_c = 1.0 H__c + 1.0 Orthophosphate_c + 1.0 ARSENOBETAINE_c + 1.0 ADP_c
rxn05193	0.0110584	1.0 Butyro_betaine_e + 1.0 H2O_c + 1.0 ATP_c = 1.0 H__c + 1.0 Orthophosphate_c + 1.0 Butyro_betaine_c + 1.0 ADP_c
rxn05192	0.0110584	1.0 H2O_c + 1.0 Crotono_betaine_e + 1.0 ATP_c = 1.0 H__c + 1.0 Orthophosphate_c + 1.0 Crotono_betaine_c + 1.0 ADP_c
rxn05159	0.0110584	1.0 H2O_c + 1.0 ATP_c + 1.0 Choline_e = 1.0 Choline_c + 1.0 Orthophosphate_c + 1.0 ADP_c + 1.0 H__c
rxn02989	0.0110584	1.0 2_Amino_3_carboxymuconate_semialdehyde_c = 1.0 H2O_c + 1.0 Pyridine_2_3_dicarboxylate_c
rxn01927	0.0110584	1.0 3_Hydroxyanthranilate_c + 1.0 Oxygen_c = 1.0 H__c + 1.0 2_Amino_3_carboxymuconate_semialdehyde_c
rxn01492	0.0110203	1.0 D_Fructose_1_phosphate_c + 1.0 ATP_c = 1.0 D_Fructose_1_6_bisphosphate_c + 1.0 ADP_c
rxn00547	0.0106585	1.0 ATP_c + 1.0 D_Fructose_c = 1.0 D_Fructose_6_phosphate_c + 1.0 ADP_c
rxn04673	0.0103704	1.0 1_4_Dihydroxy_2_naphthoate_c + 1.0 Phytyl_diphosphate_c = 1.0 H__c + 1.0 Diphosphate_c + 1.0 CO2_c + 1.0 2_Phytyl_1_4_naphthoquinone_c
rxn00016	0.0103229	1.0 H2O_c + 1.0 Chitobiose_c = 2.0 N_Acetyl_D_glucosamine_c
rxn00452	0.0102444	1.0 S_Adenosyl_L_methionine_c + 1.0 L_Homocysteine_c = 1.0 H__c + 1.0 L_Methionine_c + 1.0 S_Adenosyl_L_homocysteine_c
rxn03393	0.0102098	1.0 H__c + 1.0 3_Octaprenyl_4_hydroxybenzoate_c = 1.0 CO2_c + 1.0 2_Octaprenylphenol_c
rxn00772	0.0100924	1.0 D_Ribose_c + 1.0 ATP_c = 1.0 ADP_c + 1.0 D_Ribose_5_phosphate_c
rxn10011	0.00996456	1.0 H__c + 1.0 NADH_c + 1.0 trans_Oct_2_enoyl_CoA_c = 1.0 NAD__c + 1.0 Octanoyl_CoA_c
rxn01654	0.00976426	1.0 5_Formiminotetrahydrofolate_c + 2.0 H__c = 1.0 5_10_Methenyltetrahydrofolate_c + 1.0 NH3_c
rxn00999	0.00971267	1.0 Phenylpyruvate_c + 1.0 Oxygen_c = 1.0 CO2_c + 1.0 2_Hydroxyphenylacetate_c
rxn00375	0.00961264	1.0 N_Formyl_L_glutamate_c + 1.0 H2O_c = 1.0 L_Glutamate_c + 1.0 Formate_c
rxn00501	0.00955093	1.0 NAD__c + 1.0 CoA_c + 1.0 3_Oxopropanoate_c = 1.0 NADH_c + 1.0 CO2_c + 1.0 Acetyl_CoA_c
rxn00470	0.00949988	1.0 H__c + 1.0 L_Ornithine_c = 1.0 Putrescine_c + 1.0 CO2_c
rxn10373	0.00941366	1.0 H2O_c + 1.0 2_Acyl_sn_glycero_3_phosphoglycerol_octadecanoyl_c = 1.0 H__c + 1.0 Glycerophosphoglycerol_c + 1.0 ocdca_c
rxn01219	0.00940165	1.0 dCMP_c + 1.0 ATP_c = 1.0 ADP_c + 1.0 dCDP_c
t_cpd00063	0.00940165	1.0 H2O_c + 1.0 Calcium_e + 1.0 ATP_c = 1.0 H__c + 1.0 Orthophosphate_c + 1.0 Calcium_c + 1.0 ADP_c
rxn10537	0.00927342	1.0 Glycine_e + 1.0 Sodium_e = 1.0 Glycine_c + 1.0 Sodium_c
rxn10181	0.00927342	1.0 Nicotinamide_D_ribonucleotide_e = 1.0 Nicotinamide_D_ribonucleotide_c
rxn00599	0.00927342	1.0 H__c + 1.0 Succinyl_CoA_c + 1.0 Glycine_c = 1.0 5_Aminolevulinate_c + 1.0 CO2_c + 1.0 CoA_c
rxn00671	0.00924672	1.0 NAD__c + 1.0 2_Methyl_3_oxopropanoate_c + 1.0 CoA_c = 1.0 NADH_c + 1.0 Propanoyl_CoA_c + 1.0 CO2_c
rxn11932	0.0091872	1.0 H__c + 1.0 p_Benzenediol_c + 2.0 Nitric_oxide_c = 1.0 H2O_c + 1.0 Nitrous_oxide_c + 1.0 p_Benzoquinone_c
rxn03085	0.00894951	1.0 5_10_Methylenetetrahydromethanopterin_c + 1.0 Reduced_coenzyme_F420_c = 1.0 Coenzyme_F420_c + 1.0 5_Methyl_5_6_7_8_tetrahydromethanopterin_c
rxn10306	0.00867647	1.0 Isohexadecanoyllipoteichoic_acid__n_24___linked__unsubstituted_c + 24.0 UDP_glucose_c = 24.0 UDP_c + 1.0 Isohexadecanoyllipoteichoic_acid__n_24___linked__glucose_substituted_c
rxn10305	0.00867647	1.0 Anteisopentadecanoyllipoteichoic_acid__n_24___linked__unsubstituted_c + 24.0 UDP_glucose_c = 24.0 UDP_c + 1.0 Anteisopentadecanoyllipoteichoic_acid__n_24___linked__glucose_substituted_c
rxn10304	0.00867647	1.0 Isopentadecanoyllipoteichoic_acid__n_24___linked__unsubstituted_c + 24.0 UDP_glucose_c = 24.0 UDP_c + 1.0 Isopentadecanoyllipoteichoic_acid__n_24___linked__glucose_substituted_c
rxn10303	0.00867647	24.0 UDP_glucose_c + 1.0 Isotetradecanoyllipoteichoic_acid__n_24___linked__unsubstituted_c = 24.0 UDP_c + 1.0 Isotetradecanoyllipoteichoic_acid__n_24___linked__glucose_substituted_c
rxn10299	0.00867647	1.0 Myristoyllipoteichoic_acid__n_24___linked__unsubstituted_c + 24.0 UDP_glucose_c = 24.0 UDP_c + 1.0 Myristoyllipoteichoic_acid__n_24___linked__glucose_substituted_c
rxn10298	0.00867647	1.0 Palmitoyllipoteichoic_acid__n_24___linked__unsubstituted_c + 24.0 UDP_glucose_c = 24.0 UDP_c + 1.0 Palmitoyllipoteichoic_acid__n_24___linked__glucose_substituted_c
t_cpd00122	0.00865774	1.0 N_Acetyl_D_glucosamine_e + 1.0 Phosphoenolpyruvate_c = 1.0 Pyruvate_c + 1.0 N_Acetyl_D_glucosamine_6_phosphate_c
rxn05485	0.00865774	1.0 N_Acetyl_D_glucosamine_e + 1.0 Phosphoenolpyruvate_c = 1.0 Pyruvate_c + 1.0 N_Acetyl_D_glucosamine_6_phosphate_c
rxn05596	0.00864099	1.0 Potassium_c + 1.0 H__e = 1.0 H__c + 1.0 Potassium_e
t_cpd01912	0.0086352	2.0 Orthophosphate_c + 1.0 L_Fucose_1_phosphate_e = 1.0 L_Fucose_1_phosphate_c + 2.0 Orthophosphate_e
t_cpd00235	0.0086352	2.0 Orthophosphate_c + 1.0 D_Mannose_6_phosphate_e = 1.0 D_Mannose_6_phosphate_c + 2.0 Orthophosphate_e
t_cpd00079	0.0086352	2.0 Orthophosphate_c + 1.0 D_Glucose_6_phosphate_e = 2.0 Orthophosphate_e + 1.0 D_Glucose_6_phosphate_c
rxn00412	0.0086352	1.0 L_Glutamine_c + 1.0 H2O_c + 1.0 UTP_c + 1.0 ATP_c = 1.0 CTP_c + 2.0 H__c + 1.0 Orthophosphate_c + 1.0 L_Glutamate_c + 1.0 ADP_c
rxn00085	0.0086352	2.0 L_Glutamate_c + 1.0 NADP__c = 1.0 L_Glutamine_c + 1.0 H__c + 1.0 2_Oxoglutarate_c + 1.0 NADPH_c
rxn10188	0.0086352	2.0 Orthophosphate_c + 1.0 L_Fucose_1_phosphate_e = 1.0 L_Fucose_1_phosphate_c + 2.0 Orthophosphate_e
rxn10187	0.0086352	2.0 Orthophosphate_c + 1.0 D_Mannose_6_phosphate_e = 1.0 D_Mannose_6_phosphate_c + 2.0 Orthophosphate_e
rxn05563	0.0086352	2.0 Orthophosphate_c + 1.0 D_Glucose_6_phosphate_e = 2.0 Orthophosphate_e + 1.0 D_Glucose_6_phosphate_c
rxn01218	0.0084731	1.0 dCMP_c + 1.0 H2O_c = 1.0 H__c + 1.0 Orthophosphate_c + 1.0 Deoxycytidine_c
rxn09992	0.00836802	1.0 H2O_c + 1.0 Salicin_6_phosphate_c = 1.0 D_Glucose_6_phosphate_c + 1.0 Salicyl_alcohol_c
rxn08025	0.00836802	1.0 Arbutin_6_phosphate_c + 1.0 H2O_c = 1.0 p_Benzenediol_c + 1.0 D_Glucose_6_phosphate_c
rxn03482	0.00836802	1.0 H2O_c + 1.0 Salicin_6_phosphate_c = 1.0 beta_D_Glucose_6_phosphate_c + 1.0 Salicyl_alcohol_c
rxn03481	0.00836802	1.0 Arbutin_6_phosphate_c + 1.0 H2O_c = 1.0 p_Benzenediol_c + 1.0 beta_D_Glucose_6_phosphate_c
rxn00608	0.00836802	1.0 H2O_c + 1.0 6_Phospho_beta_D_glucosyl__1_4__D_glucose_c = 1.0 D_Glucose_c + 1.0 D_Glucose_6_phosphate_c
rxn09953	0.00831902	1.0 NAD__c + 1.0 Acetoin_c + 1.0 CoA_c = 1.0 H__c + 1.0 NADH_c + 1.0 Acetyl_CoA_c + 1.0 Acetaldehyde_c
rxn03638	0.00813566	1.0 Acetyl_CoA_c + 1.0 alpha_D_Glucosamine_1_phosphate_c = 1.0 N_Acetyl_D_glucosamine_1_phosphate_c + 1.0 CoA_c + 1.0 H__c
rxn10288	0.00813566	1.0 1_2_Diisohexadecanoyl_sn_glycerol_c + 1.0 UDP_glucose_c = 1.0 UDP_c + 1.0 Monoglucosyl_1_2_diisohexadecanoylglycerol_c
rxn10287	0.00813566	1.0 1_2_Dianteisopentadecanoyl_sn_glycerol_c + 1.0 UDP_glucose_c = 1.0 Monoglucosyl_1_2_dianteisopentadecanoylglycerol_c + 1.0 UDP_c
rxn10286	0.00813566	1.0 1_2_Diisopentadecanoyl_sn_glycerol_c + 1.0 UDP_glucose_c = 1.0 Monoglucosyl_1_2_diisopentadecanoylglycerol_c + 1.0 UDP_c
rxn10285	0.00813566	1.0 1_2_Diisotetradecanoyl_sn_glycerol_c + 1.0 UDP_glucose_c = 1.0 UDP_c + 1.0 Monoglucosyl_1_2_diisotetradecanoylglycerol_c
rxn10281	0.00813566	1.0 1_2_Diacyl_sn_glycerol_ditetradecanoyl_c + 1.0 UDP_glucose_c = 1.0 Monoglucosyl_1_2_dimyristoylglycerol_c + 1.0 UDP_c
rxn10280	0.00813566	1.0 UDP_glucose_c + 1.0 1_2_Diacyl_sn_glycerol_dihexadecanoyl_c = 1.0 UDP_c + 1.0 Monoglucosyl_1_2_dipalmitoylglycerol_c
rxn10279	0.00813566	1.0 Monoglucosyl_1_2_diisohexadecanoylglycerol_c + 1.0 UDP_glucose_c = 1.0 UDP_c + 1.0 Diglucosyl_1_2_diisohexadecanoylglycerol_c
rxn10278	0.00813566	1.0 Monoglucosyl_1_2_dianteisopentadecanoylglycerol_c + 1.0 UDP_glucose_c = 1.0 UDP_c + 1.0 Diglucosyl_1_2_dianteisopentadecanoylglycerol_c
rxn10277	0.00813566	1.0 Monoglucosyl_1_2_diisopentadecanoylglycerol_c + 1.0 UDP_glucose_c = 1.0 UDP_c + 1.0 Diglucosyl_1_2_diisopentadecanoylglycerol_c
rxn10276	0.00813566	1.0 Monoglucosyl_1_2_diisotetradecanoylglycerol_c + 1.0 UDP_glucose_c = 1.0 UDP_c + 1.0 Diglucosyl_1_2_diisotetradecanoylglycerol_c
rxn10272	0.00813566	1.0 Monoglucosyl_1_2_dimyristoylglycerol_c + 1.0 UDP_glucose_c = 1.0 UDP_c + 1.0 Diglucosyl_1_2_dimyristoylglycerol_c
rxn10271	0.00813566	1.0 Monoglucosyl_1_2_dipalmitoylglycerol_c + 1.0 UDP_glucose_c = 1.0 UDP_c + 1.0 Diglucosyl_1_2_dipalmitoylglycerol_c
rxn01505	0.00813566	1.0 N_Acetyl_D_glucosamine_6_phosphate_c = 1.0 N_Acetyl_D_glucosamine_1_phosphate_c
rxn00642	0.00813566	1.0 GDP_mannose_c = 1.0 H2O_c + 1.0 GDP_4_dehydro_6_deoxy_D_mannose_c
rxn02166	0.00795019	1.0 H2O_c + 1.0 4_Nitrophenyl_phosphate_c = 1.0 H__c + 1.0 Orthophosphate_c + 1.0 4_Nitrophenol_c
rxn01171	0.00791949	1.0 D_Glucose_c = 1.0 beta_D_Glucose_c
rxn05602	0.00791007	1.0 _S__Lactate_e + 1.0 H__e = 1.0 H__c + 1.0 _S__Lactate_c
rxn06673	0.00785976	1.0 Acetyl_CoA_c + 1.0 Carboxybiotin_carboxyl_carrier_protein_c = 1.0 Holo__carboxylase__c + 1.0 Malonyl_CoA_c
rxn00711	0.00785976	1.0 Uracil_c + 1.0 5_Phospho_alpha_D_ribose_1_diphosphate_c = 1.0 UMP_c + 1.0 Diphosphate_c
rxn00692	0.00785976	1.0 H2O_c + 1.0 5_10_Methylenetetrahydrofolate_c + 1.0 Glycine_c = 1.0 Tetrahydrofolate_c + 1.0 L_Serine_c
rxn00604	0.00785976	1.0 D_Glucose_6_phosphate_c + 1.0 NADP__c = 1.0 D_Glucono_1_5_lactone_6_phosphate_c + 1.0 H__c + 1.0 NADPH_c
rxn10154	0.00785976	1.0 Succinate_e + 2.0 H__e = 1.0 Succinate_c + 2.0 H__c
rxn10153	0.00785976	1.0 _S__Malate_e + 2.0 H__e = 2.0 H__c + 1.0 _S__Malate_c
rxn10152	0.00785976	1.0 Fumarate_e + 2.0 H__e = 2.0 H__c + 1.0 Fumarate_c
rxn01618	0.00785976	1.0 _S__Lactaldehyde_c + 1.0 NADP__c = 1.0 H__c + 1.0 Methylglyoxal_c + 1.0 NADPH_c
rxn00351	0.00785976	1.0 ATP_c + 1.0 Glycine_c + 1.0 gamma_L_Glutamyl_L_cysteine_c = 1.0 H__c + 1.0 Orthophosphate_c + 1.0 Glutathione_c + 1.0 ADP_c
rxn01639	0.0078199	1.0 L_Glutamate_c + 1.0 Formamide_c = 1.0 H2O_c + 1.0 N_Formimino_L_glutamate_c
rxn05514	0.00771917	1.0 Calcium_c + 1.0 H__e = 1.0 H__c + 1.0 Calcium_e
rxn05607	0.00758634	1.0 Maltose_e + 1.0 Phosphoenolpyruvate_c = 1.0 Pyruvate_c + 1.0 Maltose_6__phosphate_c
rxn04386	0.00758634	1.0 L_Threonine_c = 1.0 L_Threonine_O_3_phosphate_c
rxn11684	0.00758634	1.0 4_4__Diapophytoene_c = 2.0 trans_trans_Farnesyl_diphosphate_c
rxn10626	0.00758634	1.0 Isochorismate_c + 1.0 Succinate_semialdehyde_c = 1.0 Pyruvate_c + 1.0 2_Succinyl_6_hydroxy_2_4_cyclohexadiene_1_carboxylate_c
rxn08129	0.00758634	1.0 Maltohexaose_c + 1.0 Maltose_c = 1.0 D_Glucose_c + 1.0 Maltoheptaose_c
rxn08128	0.00758634	1.0 Maltopentaose_c + 1.0 Maltose_c = 1.0 Maltohexaose_c + 1.0 D_Glucose_c
rxn08127	0.00758634	1.0 Maltose_c + 1.0 Maltotetraose_c = 1.0 Maltopentaose_c + 1.0 D_Glucose_c
rxn08126	0.00758634	1.0 Maltotriose_c + 1.0 Maltose_c = 1.0 D_Glucose_c + 1.0 Maltotetraose_c
rxn10372	0.00756981	1.0 2_Acyl_sn_glycero_3_phosphoethanolamine_octadecanoyl_c + 1.0 H2O_c = 1.0 H__c + 1.0 sn_glycero_3_Phosphoethanolamine_c + 1.0 ocdca_c
rxn10371	0.00756981	1.0 2_octadecanoyl_sn_glycerol_3_phosphate_c + 1.0 H2O_c = 1.0 H__c + 1.0 sn_Glycerol_3_phosphate_c + 1.0 ocdca_c
rxn10370	0.00756981	1.0 H2O_c + 1.0 1_Acyl_sn_glycero_3_phosphoglycerol_octadecanoyl_c = 1.0 H__c + 1.0 Glycerophosphoglycerol_c + 1.0 ocdca_c
rxn10369	0.00756981	1.0 H__c + 1.0 H2O_c + 1.0 1_Acyl_sn_glycero_3_phosphoethanolamine_c = 1.0 sn_glycero_3_Phosphoethanolamine_c + 1.0 ocdca_c
rxn10368	0.00756981	1.0 1_octadecanoyl_sn_glycerol_3_phosphate_c + 1.0 H2O_c = 1.0 H__c + 1.0 sn_Glycerol_3_phosphate_c + 1.0 ocdca_c
rxn08851	0.00756981	1.0 2_Acyl_sn_glycero_3_phosphoglycerol_octadec_11_enoyl_c + 1.0 H2O_c = 1.0 H__c + 1.0 octadecenoate_c + 1.0 Glycerophosphoglycerol_c
rxn08850	0.00756981	1.0 H2O_c + 1.0 2_Acyl_sn_glycero_3_phosphoglycerol_octadecanoyl_c = 1.0 H__c + 1.0 Octadecanoic_acid_c + 1.0 Glycerophosphoglycerol_c
rxn08849	0.00756981	1.0 H2O_c + 1.0 2_Acyl_sn_glycero_3_phosphoglycerol_hexadec_9_enoyl_c = 1.0 hexadecenoate_c + 1.0 Glycerophosphoglycerol_c + 1.0 H__c
rxn08848	0.00756981	1.0 2_Acyl_sn_glycero_3_phosphoglycerol_hexadecanoyl_c + 1.0 H2O_c = 1.0 Hexadecanoic_acid_c + 1.0 Glycerophosphoglycerol_c + 1.0 H__c
rxn08847	0.00756981	1.0 H2O_c + 1.0 2_Acyl_sn_glycero_3_phosphoglycerol_tetradec_7_enoyl_c = 1.0 H__c + 1.0 tetradecenoate_c + 1.0 Glycerophosphoglycerol_c
rxn08846	0.00756981	1.0 2_Acyl_sn_glycero_3_phosphoglycerol_tetradecanoyl_c + 1.0 H2O_c = 1.0 H__c + 1.0 Tetradecanoic_acid_c + 1.0 Glycerophosphoglycerol_c
rxn08845	0.00756981	1.0 2_Acyl_sn_glycero_3_phosphoglycerol_dodecanoyl_c + 1.0 H2O_c = 1.0 H__c + 1.0 Dodecanoic_acid_c + 1.0 Glycerophosphoglycerol_c
rxn08844	0.00756981	1.0 H2O_c + 1.0 2_Acyl_sn_glycero_3_phosphoethanolamine_octadec_11_enoyl_c = 1.0 octadecenoate_c + 1.0 sn_glycero_3_Phosphoethanolamine_c + 1.0 H__c
rxn08843	0.00756981	1.0 2_Acyl_sn_glycero_3_phosphoethanolamine_octadecanoyl_c + 1.0 H2O_c = 1.0 H__c + 1.0 Octadecanoic_acid_c + 1.0 sn_glycero_3_Phosphoethanolamine_c
rxn08842	0.00756981	1.0 2_Acyl_sn_glycero_3_phosphoethanolamine_hexadec_9_enoyl_c + 1.0 H2O_c = 1.0 hexadecenoate_c + 1.0 sn_glycero_3_Phosphoethanolamine_c + 1.0 H__c
rxn08841	0.00756981	1.0 H2O_c + 1.0 2_Acyl_sn_glycero_3_phosphoethanolamine_hexadecanoyl_c = 1.0 Hexadecanoic_acid_c + 1.0 sn_glycero_3_Phosphoethanolamine_c + 1.0 H__c
rxn08840	0.00756981	1.0 2_Acyl_sn_glycero_3_phosphoethanolamine_tetradec_7_enoyl_c + 1.0 H2O_c = 1.0 H__c + 1.0 sn_glycero_3_Phosphoethanolamine_c + 1.0 tetradecenoate_c
rxn08839	0.00756981	1.0 H2O_c + 1.0 2_Acyl_sn_glycero_3_phosphoethanolamine_tetradecanoyl_c = 1.0 H__c + 1.0 sn_glycero_3_Phosphoethanolamine_c + 1.0 Tetradecanoic_acid_c
rxn08838	0.00756981	1.0 H2O_c + 1.0 2_Acyl_sn_glycero_3_phosphoethanolamine_dodecanoyl_c = 1.0 H__c + 1.0 sn_glycero_3_Phosphoethanolamine_c + 1.0 Dodecanoic_acid_c
rxn08823	0.00756981	1.0 2_octadec_11_enoyl_sn_glycerol_3_phosphate_c + 1.0 H2O_c = 1.0 sn_Glycerol_3_phosphate_c + 1.0 octadecenoate_c + 1.0 H__c
rxn08822	0.00756981	1.0 2_octadecanoyl_sn_glycerol_3_phosphate_c + 1.0 H2O_c = 1.0 sn_Glycerol_3_phosphate_c + 1.0 Octadecanoic_acid_c + 1.0 H__c
rxn08821	0.00756981	1.0 H2O_c + 1.0 2_hexadec_9_enoyl_sn_glycerol_3_phosphate_c = 1.0 hexadecenoate_c + 1.0 H__c + 1.0 sn_Glycerol_3_phosphate_c
rxn08820	0.00756981	1.0 H2O_c + 1.0 2_hexadecanoyl_sn_glycerol_3_phosphate_c = 1.0 Hexadecanoic_acid_c + 1.0 sn_Glycerol_3_phosphate_c + 1.0 H__c
rxn08819	0.00756981	1.0 2_tetradec_7_enoyl_sn_glycerol_3_phosphate_c + 1.0 H2O_c = 1.0 sn_Glycerol_3_phosphate_c + 1.0 tetradecenoate_c + 1.0 H__c
rxn08818	0.00756981	1.0 H2O_c + 1.0 2_tetradecanoyl_sn_glycerol_3_phosphate_c = 1.0 H__c + 1.0 Tetradecanoic_acid_c + 1.0 sn_Glycerol_3_phosphate_c
rxn08817	0.00756981	1.0 H2O_c + 1.0 2_dodecanoyl_sn_glycerol_3_phosphate_c = 1.0 H__c + 1.0 Dodecanoic_acid_c + 1.0 sn_Glycerol_3_phosphate_c
rxn08816	0.00756981	1.0 H2O_c + 1.0 1_Acyl_sn_glycero_3_phosphoglycerol_octadec_11_enoyl_c = 1.0 H__c + 1.0 octadecenoate_c + 1.0 Glycerophosphoglycerol_c
rxn08815	0.00756981	1.0 H2O_c + 1.0 1_Acyl_sn_glycero_3_phosphoglycerol_octadecanoyl_c = 1.0 H__c + 1.0 Octadecanoic_acid_c + 1.0 Glycerophosphoglycerol_c
rxn08814	0.00756981	1.0 H2O_c + 1.0 1_Acyl_sn_glycero_3_phosphoglycerol_hexadec_9_enoyl_c = 1.0 hexadecenoate_c + 1.0 Glycerophosphoglycerol_c + 1.0 H__c
rxn08813	0.00756981	1.0 H2O_c + 1.0 1_Acyl_sn_glycero_3_phosphoglycerol_hexadecanoyl_c = 1.0 Hexadecanoic_acid_c + 1.0 Glycerophosphoglycerol_c + 1.0 H__c
rxn08812	0.00756981	1.0 H2O_c + 1.0 1_Acyl_sn_glycero_3_phosphoglycerol_tetradec_7_enoyl_c = 1.0 H__c + 1.0 tetradecenoate_c + 1.0 Glycerophosphoglycerol_c
rxn08811	0.00756981	1.0 H2O_c + 1.0 1_Acyl_sn_glycero_3_phosphoglycerol_tetradecanoyl_c = 1.0 H__c + 1.0 Tetradecanoic_acid_c + 1.0 Glycerophosphoglycerol_c
rxn08810	0.00756981	1.0 H2O_c + 1.0 1_Acyl_sn_glycero_3_phosphoglycerol_dodecanoyl_c = 1.0 H__c + 1.0 Dodecanoic_acid_c + 1.0 Glycerophosphoglycerol_c
rxn08809	0.00756981	1.0 H2O_c + 1.0 1_Acyl_sn_glycero_3_phosphoethanolamine_c = 1.0 octadecenoate_c + 1.0 sn_glycero_3_Phosphoethanolamine_c + 1.0 H__c
rxn08808	0.00756981	1.0 H__c + 1.0 H2O_c + 1.0 1_Acyl_sn_glycero_3_phosphoethanolamine_c = 1.0 Octadecanoic_acid_c + 1.0 sn_glycero_3_Phosphoethanolamine_c
rxn08807	0.00756981	1.0 H2O_c + 1.0 1_Acyl_sn_glycero_3_phosphoethanolamine_hexadec_9_enoyl_c = 1.0 hexadecenoate_c + 1.0 sn_glycero_3_Phosphoethanolamine_c + 1.0 H__c
rxn08806	0.00756981	1.0 1_Acyl_sn_glycero_3_phosphoethanolamine_hexadecanoyl_c + 1.0 H2O_c = 1.0 Hexadecanoic_acid_c + 1.0 sn_glycero_3_Phosphoethanolamine_c + 1.0 H__c
rxn08805	0.00756981	1.0 1_Acyl_sn_glycero_3_phosphoethanolamine_tetradec_7_enoyl_c + 1.0 H2O_c = 1.0 H__c + 1.0 sn_glycero_3_Phosphoethanolamine_c + 1.0 tetradecenoate_c
rxn08804	0.00756981	1.0 1_Acyl_sn_glycero_3_phosphoethanolamine_tetradecanoyl_c + 1.0 H2O_c = 1.0 H__c + 1.0 sn_glycero_3_Phosphoethanolamine_c + 1.0 Tetradecanoic_acid_c
rxn08803	0.00756981	1.0 H2O_c + 1.0 1_Acyl_sn_glycero_3_phosphoethanolamine_dodecanoyl_c = 1.0 H__c + 1.0 sn_glycero_3_Phosphoethanolamine_c + 1.0 Dodecanoic_acid_c
rxn08802	0.00756981	1.0 H2O_c + 1.0 1_octadec_11_enoyl_sn_glycerol_3_phosphate_c = 1.0 sn_Glycerol_3_phosphate_c + 1.0 octadecenoate_c + 1.0 H__c
rxn08800	0.00756981	1.0 H2O_c + 1.0 1_hexadec_9_enoyl_sn_glycerol_3_phosphate_c = 1.0 hexadecenoate_c + 1.0 H__c + 1.0 sn_Glycerol_3_phosphate_c
rxn08799	0.00756981	1.0 H2O_c + 1.0 1_hexadecanoyl_sn_glycerol_3_phosphate_c = 1.0 Hexadecanoic_acid_c + 1.0 sn_Glycerol_3_phosphate_c + 1.0 H__c
rxn08798	0.00756981	1.0 1_tetradec_7_enoyl_sn_glycerol_3_phosphate_c + 1.0 H2O_c = 1.0 sn_Glycerol_3_phosphate_c + 1.0 tetradecenoate_c + 1.0 H__c
rxn08797	0.00756981	1.0 H2O_c + 1.0 1_tetradecanoyl_sn_glycerol_3_phosphate_c = 1.0 H__c + 1.0 Tetradecanoic_acid_c + 1.0 sn_Glycerol_3_phosphate_c
rxn08796	0.00756981	1.0 H2O_c + 1.0 1_dodecanoyl_sn_glycerol_3_phosphate_c = 1.0 H__c + 1.0 Dodecanoic_acid_c + 1.0 sn_Glycerol_3_phosphate_c
rxn03030	0.00750825	1.0 H2O_c + 1.0 Acetyl_CoA_c + 1.0 2_3_4_5_Tetrahydrodipicolinate_c = 1.0 CoA_c + 1.0 N_Acetyl_L_2_amino_6_oxopimelate_c
rxn05173	0.00747502	1.0 L_Arabinose_e + 1.0 H2O_c + 1.0 ATP_c = 1.0 H__c + 1.0 Orthophosphate_c + 1.0 ADP_c + 1.0 L_Arabinose_c
t_cpd00224	0.00747502	1.0 L_Arabinose_e + 1.0 H2O_c + 1.0 ATP_c = 1.0 H__c + 1.0 Orthophosphate_c + 1.0 ADP_c + 1.0 L_Arabinose_c
rxn01522	0.00747058	1.0 NAD__c + 1.0 Xanthine_c + 1.0 H2O_c = 1.0 H__c + 1.0 Urate_c + 1.0 NADH_c
rxn01634	0.00744334	1.0 5_Dehydro_4_deoxy_D_glucarate_c + 1.0 H__c = 1.0 H2O_c + 1.0 CO2_c + 1.0 2_5_Dioxopentanoate_c
rxn00336	0.00724797	1.0 Isocitrate_c = 1.0 Succinate_c + 1.0 Glyoxylate_c
t_cpd00154	0.00722356	1.0 H2O_c + 1.0 ATP_c + 1.0 D_Xylose_e = 1.0 D_Xylose_c + 1.0 Orthophosphate_c + 1.0 ADP_c + 1.0 H__c
rxn05167	0.00722356	1.0 H2O_c + 1.0 ATP_c + 1.0 D_Xylose_e = 1.0 D_Xylose_c + 1.0 Orthophosphate_c + 1.0 ADP_c + 1.0 H__c
rxn00904	0.00721024	1.0 Pyruvate_c + 1.0 L_Valine_c = 1.0 L_Alanine_c + 1.0 3_Methyl_2_oxobutanoic_acid_c
rxn02279	0.00711636	1.0 L_Gulono_1_4_lactone_c + 1.0 Oxygen_c = 1.0 L_xylo_Hexulonolactone_c + 1.0 H2O2_c
rxn00449	0.00711636	1.0 H__c + 1.0 Ascorbate_c = 1.0 L_xylo_Hexulonolactone_c
rxn00715	0.00708876	1.0 ITP_c + 1.0 Uridine_c = 1.0 UMP_c + 1.0 IDP_c
rxn00713	0.00708876	1.0 GTP_c + 1.0 Uridine_c = 1.0 UMP_c + 1.0 GDP_c
rxn00709	0.00708876	1.0 ATP_c + 1.0 Uridine_c = 1.0 UMP_c + 1.0 ADP_c
rxn00369	0.00708876	1.0 GTP_c + 1.0 Cytidine_c = 1.0 GDP_c + 1.0 CMP_c
rxn00368	0.00708876	1.0 UTP_c + 1.0 Cytidine_c = 1.0 UDP_c + 1.0 CMP_c
rxn00365	0.00708876	1.0 ATP_c + 1.0 Cytidine_c = 1.0 ADP_c + 1.0 CMP_c
rxn07587	0.00701758	1.0 Cobalt_precorrin_5B_c + 1.0 S_Adenosyl_L_methionine_c = 1.0 H__c + 1.0 S_Adenosyl_L_homocysteine_c + 1.0 Cobalt_precorrin_6_c
rxn00816	0.00698329	1.0 H2O_c + 1.0 Lactose_c = 1.0 D_Glucose_c + 1.0 D_Galactose_c
rxn02268	0.00689872	2.0 2_Methylbutanoyl_CoA_c + 1.0 Oxygen_c = 2.0 H2O_c + 2.0 2_Methylbut_2_enoyl_CoA_c
rxn05221	0.0066264	1.0 Sodium_e + 1.0 L_Proline_e = 1.0 L_Proline_c + 1.0 Sodium_c
rxn03057	0.00661945	1.0 S_Methyl_5_thio_D_ribose_1_phosphate_c = 1.0 S_Methyl_5_thio_D_ribulose_1_phosphate_c
rxn05181	0.00620369	1.0 Betaine_e + 1.0 H2O_c + 1.0 ATP_c = 1.0 H__c + 1.0 Orthophosphate_c + 1.0 ADP_c + 1.0 Betaine_c
rxn01366	0.00618701	1.0 H__c + 1.0 Orthophosphate_c + 1.0 Uridine_c = 1.0 Uracil_c + 1.0 alpha_D_Ribose_1_phosphate_c
rxn03040	0.00615748	1.0 5_Carboxymethyl_2_hydroxymuconate_c = 1.0 5_Carboxy_2_oxohept_3_enedioate_c
rxn00285	0.00610017	1.0 Succinate_c + 1.0 CoA_c + 1.0 ATP_c = 1.0 Orthophosphate_c + 1.0 Succinyl_CoA_c + 1.0 ADP_c
rxn02113	0.00610017	1.0 H__c + 1.0 2_Acetolactate_c = 1.0 CO2_c + 1.0 Acetoin_c
rxn00641	0.00607859	1.0 D_Mannose_1_phosphate_c + 1.0 GTP_c = 1.0 GDP_mannose_c + 1.0 Diphosphate_c
rxn00500	0.00607479	1.0 NAD__c + 1.0 _R__Lactate_c = 1.0 Pyruvate_c + 1.0 H__c + 1.0 NADH_c
rxn10945	0.00601314	1.0 L_Proline_e = 1.0 L_Proline_c
t_cpd00024	0.00594754	1.0 2_Oxoglutarate_e + 1.0 H__e = 1.0 H__c + 1.0 2_Oxoglutarate_c
rxn05493	0.00594754	1.0 2_Oxoglutarate_e + 1.0 H__e = 1.0 H__c + 1.0 2_Oxoglutarate_c
rxn02339	0.00592772	1.0 2_Oxoglutarate_c + 1.0 4_Hydroxy_L_glutamate_c = 1.0 4_Hydroxy_2_oxoglutarate_c + 1.0 L_Glutamate_c
rxn00010	0.00589748	1.0 H__c + 2.0 Glyoxylate_c = 1.0 2_Hydroxy_3_oxopropanoate_c + 1.0 CO2_c
rxn09422	0.00584986	9.0 H__c + 1.0 Acetyl__acyl_carrier_protein__c + 3.0 Malonyl__acyl_carrier_protein__c + 6.0 NADPH_c = 3.0 H2O_c + 3.0 CO2_c + 1.0 Octanoyl__acp__c + 3.0 Acyl_carrier_protein_c + 6.0 NADP__c
rxn02985	0.00584986	1.0 6_Lactoyl_5_6_7_8_tetrahydropterin_c + 1.0 NADP__c = 1.0 6_Pyruvoyltetrahydropterin_c + 1.0 NADPH_c + 1.0 H__c
rxn01663	0.00584986	1.0 H2O_c + 1.0 N6__L_1_3_Dicarboxypropyl__L_lysine_c + 1.0 NADP__c = 1.0 L_2_Aminoadipate_6_semialdehyde_c + 1.0 L_Glutamate_c + 1.0 NADPH_c + 1.0 H__c
rxn01324	0.00584986	1.0 NADP__c + 1.0 Tetrahydrobiopterin_c = 1.0 H__c + 1.0 NADPH_c + 1.0 6_Lactoyl_5_6_7_8_tetrahydropterin_c
rxn00152	0.00584986	1.0 Pyruvate_c + 2.0 H__c + 1.0 Orthophosphate_c + 1.0 Oxygen_c = 1.0 Acetyl_phosphate_c + 1.0 H2O2_c + 1.0 CO2_c
rxn01870	0.0058394	1.0 D_Fructose_1_phosphate_c = 1.0 Glycerone_phosphate_c + 1.0 D_Glyceraldehyde_c
rxn00598	0.00577731	1.0 Succinyl_CoA_c + 1.0 Acetyl_CoA_c = 1.0 3_Oxoadipyl_CoA_c + 1.0 CoA_c
rxn00508	0.00534573	1.0 NAD__c + 1.0 H2O_c + 1.0 Succinate_semialdehyde_c = 1.0 Succinate_c + 2.0 H__c + 1.0 NADH_c
t_cpd00023	0.00532313	1.0 L_Glutamate_e + 1.0 H__e = 1.0 H__c + 1.0 L_Glutamate_c
rxn05407	0.00531324	1.0 H__c + 1.0 NADPH_c + 1.0 15_methyl_trans_hexa_dec_2_enoyl_ACP_c = 1.0 15_methyl_hexa_decanoyl_ACP_c + 1.0 NADP__c
rxn00541	0.00513904	1.0 L_Threonine_c = 1.0 Acetaldehyde_c + 1.0 Glycine_c
rxn02569	0.00492936	1.0 H2O_c + 1.0 Selenide_c + 1.0 ATP_c = 2.0 H__c + 1.0 Orthophosphate_c + 1.0 Selenophosphate_c + 1.0 AMP_c
rxn08333	0.00490374	1.0 H__c + 1.0 all_trans_Octaprenyl_diphosphate_c + 1.0 1_4_Dihydroxy_2_naphthoate_c = 1.0 Diphosphate_c + 1.0 CO2_c + 1.0 2_Demethylmenaquinol_8_c
rxn00312	0.0048549	1.0 L_Lysine_c + 1.0 Oxygen_c = 1.0 5_Aminopentanamide_c + 1.0 H2O_c + 1.0 CO2_c
rxn01775	0.00482784	1.0 NAD__c + 1.0 D_Mannonate_c = 1.0 NADH_c + 1.0 H__c + 1.0 D_Fructuronate_c
rxn00002	0.00482176	3.0 H__c + 1.0 H2O_c + 1.0 Urea_1_carboxylate_c = 2.0 CO2_c + 2.0 NH3_c
rxn00321	0.00479556	1.0 L_Lysine_c = 1.0 _3S__3_6_Diaminohexanoate_c
rxn08801	0.00469324	1.0 1_octadecanoyl_sn_glycerol_3_phosphate_c + 1.0 H2O_c = 1.0 sn_Glycerol_3_phosphate_c + 1.0 Octadecanoic_acid_c + 1.0 H__c
rxn02190	0.00464293	1.0 5_6_Dihydrothymine_c + 1.0 H2O_c = 1.0 H__c + 1.0 3_Ureidoisobutyrate_c
rxn01626	0.00464293	1.0 5_6_Dihydrouracil_c + 1.0 H2O_c = 1.0 H__c + 1.0 3_Ureidopropionate_c
t_cpd00971	0.00461741	1.0 Sodium_e + 1.0 H__c = 1.0 Sodium_c + 1.0 H__e
t_cpd00064	0.004563	1.0 L_Arginine_e + 1.0 L_Ornithine_c = 1.0 L_Ornithine_e + 1.0 L_Arginine_c
t_cpd00218	0.00449163	1.0 Nicotinate_e = 1.0 Nicotinate_c
rxn01636	0.00449163	1.0 L_Glutamate_c + 1.0 N_Acetylornithine_c = 1.0 N_Acetyl_L_glutamate_c + 1.0 L_Ornithine_c
rxn05207	0.00449163	1.0 Sodium_e + 1.0 _S__Malate_e = 1.0 _S__Malate_c + 1.0 Sodium_c
rxn03884	0.00427226	1.0 2_Dehydro_3_deoxy_6_phospho_D_gluconate_c = 1.0 Pyruvate_c + 1.0 D_Glyceraldehyde_3_phosphate_c
rxn00499	0.00425483	1.0 NAD__c + 1.0 _S__Lactate_c = 1.0 Pyruvate_c + 1.0 H__c + 1.0 NADH_c
rxn10124	0.00413268	3.8 H__c + 1.0 2_Demethylmenaquinone_8_c + 1.0 NADH_c = 1.0 NAD__c + 1.0 2_Demethylmenaquinol_8_c + 2.8 H__e
rxn02122	0.00411316	1.0 NAD__c + 2.0 H2O_c + 1.0 D_Glucuronolactone_c = 3.0 H__c + 1.0 D_Glucarate_c + 1.0 NADH_c
rxn00422	0.00411316	1.0 Pyruvate_c + 1.0 L_Serine_c = 1.0 L_Alanine_c + 1.0 Hydroxypyruvate_c
rxn00272	0.00411316	1.0 L_Alanine_c + 1.0 Glyoxylate_c = 1.0 Pyruvate_c + 1.0 Glycine_c
rxn06075	0.00409631	1.0 UDP_c + 1.0 trdrd_c = 1.0 H2O_c + 1.0 trdox_c + 1.0 dUDP_c
rxn05233	0.00409631	1.0 GDP_c + 1.0 trdrd_c = 1.0 H2O_c + 1.0 dGDP_c + 1.0 trdox_c
rxn02046	0.00409549	1.0 H2O_c + 1.0 D_O_Phosphoserine_c = 1.0 H__c + 1.0 Orthophosphate_c + 1.0 D_Serine_c
rxn01388	0.00398988	1.0 Isocitrate_c = 1.0 H2O_c + 1.0 cis_Aconitate_c
rxn00974	0.00398988	1.0 Citrate_c = 1.0 H2O_c + 1.0 cis_Aconitate_c
rxn00973	0.00398988	1.0 Citrate_c = 1.0 Isocitrate_c
rxn07845	0.00398194	1.0 D_Glucarate_c = 1.0 H2O_c + 1.0 2_Dehydro_3_deoxy_D_glucarate_c
rxn01989	0.00398194	1.0 D_Glucarate_c = 1.0 5_Dehydro_4_deoxy_D_glucarate_c + 1.0 H2O_c
rxn04989	0.00397254	1.0 L_Phenylalanine_c + 1.0 Oxygen_c + 1.0 Tetrahydrobiopterin_c = 1.0 L_Tyrosine_c + 1.0 _6R__6__L_erythro_1_2_Dihydroxypropyl__5_6_7_8_tetrahydro_4a__hydroxypterin_c
rxn01315	0.00397254	1.0 L_Phenylalanine_c + 1.0 Oxygen_c + 1.0 Tetrahydrobiopterin_c = 1.0 H2O_c + 1.0 Dihydrobiopterin_c + 1.0 L_Tyrosine_c
rxn02914	0.00395474	1.0 2_Oxoglutarate_c + 1.0 phosphoserine_c = 1.0 L_Glutamate_c + 1.0 3_Phosphonooxypyruvate_c
rxn04016	0.0039216	1.0 trans_Aconitate_c + 1.0 S_Adenosyl_L_methionine_c = 1.0 _E__3__Methoxycarbonyl_pent_2_enedioate_c + 1.0 S_Adenosyl_L_homocysteine_c
rxn01368	0.00372884	1.0 H__c + 1.0 H2O_c + 1.0 Cytidine_c = 1.0 NH3_c + 1.0 Uridine_c
rxn01868	0.00371005	1.0 H2O_c + 1.0 Betaine_aldehyde_c + 1.0 NADP__c = 2.0 H__c + 1.0 NADPH_c + 1.0 Betaine_c
rxn05732	0.00365525	1.0 H__c + 1.0 NADH_c + 1.0 trans_Hexadec_2_enoyl_CoA_c = 1.0 NAD__c + 1.0 Palmitoyl_CoA_c
rxn00830	0.00343161	1.0 Isopentenyl_diphosphate_c = 1.0 Dimethylallyl_diphosphate_c
rxn00695	0.00324087	1.0 ATP_c + 1.0 D_Glucose_1_phosphate_c = 1.0 Diphosphate_c + 1.0 ADP_glucose_c
rxn00222	0.00305573	1.0 Cellobiose_c + 1.0 H2O_c = 2.0 D_Glucose_c
rxn00020	0.00305573	1.0 Cellobiose_c + 1.0 H2O_c = 2.0 beta_D_Glucose_c
rxn01748	0.00301783	1.0 _S_____Allantoin_c + 1.0 H2O_c = 1.0 H__c + 1.0 Allantoate_c
rxn08711	0.00299998	1.0 heptosyl_kdo2_lipidA_c + 1.0 ADP_L_glycero_D_manno_heptose_c = 1.0 ADP_c + 1.0 heptosyl_heptosyl_kdo2_lipidA_c
rxn00479	0.00294884	1.0 L_Tryptophan_c + 1.0 Oxygen_c = 1.0 _Indol_3_yl_acetamide_c + 1.0 H2O_c + 1.0 CO2_c
rxn00743	0.00290069	1.0 Glycerone_phosphate_c + 1.0 H2O_c = 1.0 H__c + 1.0 Orthophosphate_c + 1.0 Glycerone_c
rxn03975	0.00289967	1.0 NADPH_c + 1.0 FMN_c + 1.0 H__c = 1.0 flavin_mononucleotide_reduced_c + 1.0 NADP__c
rxn10167	0.00289583	1.0 L_Idonate_e + 1.0 H__e = 1.0 L_Idonate_c + 1.0 H__c
rxn01573	0.00286371	1.0 NAD__c + 1.0 H2O_c + 1.0 L_Isoleucine_c = 1.0 H__c + 1.0 _S__3_Methyl_2_oxopentanoic_acid_c + 1.0 NADH_c + 1.0 NH3_c
rxn01045	0.00286371	1.0 NAD__c + 1.0 H2O_c + 1.0 L_Valine_c = 1.0 3_Methyl_2_oxobutanoic_acid_c + 1.0 NADH_c + 1.0 NH3_c + 1.0 H__c
rxn00804	0.00286371	1.0 NAD__c + 1.0 L_Leucine_c + 1.0 H2O_c = 1.0 4_Methyl_2_oxopentanoate_c + 1.0 H__c + 1.0 NADH_c + 1.0 NH3_c
rxn00469	0.00285033	1.0 H2O_c + 1.0 N_Acetylornithine_c = 1.0 L_Ornithine_c + 1.0 Acetate_c
rxn09167	0.00276584	1.0 Pyruvate_c + 1.0 H2O_c + 1.0 Ubiquinone_8_c = 1.0 CO2_c + 1.0 Acetate_c + 1.0 Ubiquinol_8_c
rxn05938	0.00258572	1.0 H__c + 1.0 CO2_c + 1.0 Acetyl_CoA_c + 1.0 Reduced_ferredoxin_c = 1.0 Pyruvate_c + 1.0 Oxidized_ferredoxin_c + 1.0 CoA_c
rxn05362	0.00257934	1.0 4_methyl_trans_hex_2_enoyl_ACP_c + 1.0 NADPH_c + 1.0 H__c = 1.0 4_methyl_hexanoyl_ACP_c + 1.0 NADP__c
rxn02788	0.00256205	1.0 2_Hydroxymuconate_c = 1.0 _Z__5_Oxohex_2_enedioate_c
rxn02112	0.00249626	1.0 NAD__c + 1.0 _R_R__Butane_2_3_diol_c = 1.0 H__c + 1.0 NADH_c + 1.0 Acetoin_c
rxn01304	0.0024699	1.0 Succinyl_CoA_c + 1.0 L_Homoserine_c = 1.0 CoA_c + 1.0 O_Succinyl_L_homoserine_c
rxn00509	0.0024699	1.0 H2O_c + 1.0 Succinate_semialdehyde_c + 1.0 NADP__c = 1.0 Succinate_c + 2.0 H__c + 1.0 NADPH_c
rxn00171	0.0024699	1.0 NAD__c + 1.0 CoA_c + 1.0 Acetaldehyde_c = 1.0 H__c + 1.0 NADH_c + 1.0 Acetyl_CoA_c
rxn01635	0.00238323	1.0 H__c + 1.0 H2O_c + 1.0 1_Pyrroline_4_hydroxy_2_carboxylate_c = 1.0 2_5_Dioxopentanoate_c + 1.0 NH3_c
rxn02944	0.00235149	1.0 N2_Succinyl_L_ornithine_c + 1.0 2_Oxoglutarate_c = 1.0 L_Glutamate_c + 1.0 N_Succinyl_L_glutamate_5_semialdehyde_c
rxn01437	0.00216256	1.0 L_Formylkynurenine_c + 1.0 H2O_c = 1.0 H__c + 1.0 L_Kynurenine_c + 1.0 Formate_c
t_cpd11595	0.00214102	1.0 chromate_c + 1.0 H__e = 1.0 H__c + 1.0 chromate_e
rxn05526	0.00214102	1.0 chromate_c + 1.0 H__e = 1.0 H__c + 1.0 chromate_e
rxn04704	0.00214102	1.0 Coproporphyrinogen_III_c + 2.0 S_Adenosyl_L_methionine_c = 2.0 5__Deoxyadenosine_c + 2.0 CO2_c + 2.0 L_Methionine_c + 1.0 Protoporphyrinogen_IX_c
rxn01453	0.00212525	1.0 _R__3_Hydroxybutanoyl_CoA_c + 1.0 NADP__c = 1.0 H__c + 1.0 NADPH_c + 1.0 Acetoacetyl_CoA_c
rxn08979	0.00211869	1.0 H__c + 1.0 2_Demethylmenaquinone_8_c + 1.0 NADPH_c = 1.0 2_Demethylmenaquinol_8_c + 1.0 NADP__c
rxn08978	0.00211869	1.0 H__c + 1.0 Menaquinone_8_c + 1.0 NADPH_c = 1.0 Menaquinol_8_c + 1.0 NADP__c
rxn08977	0.00211869	1.0 H__c + 1.0 NADPH_c + 1.0 Ubiquinone_8_c = 1.0 Ubiquinol_8_c + 1.0 NADP__c
rxn01438	0.00211869	1.0 H__c + 1.0 L_Kynurenine_c + 1.0 NADPH_c + 1.0 Oxygen_c = 1.0 H2O_c + 1.0 3_Hydroxy_L_kynurenine_c + 1.0 NADP__c
rxn10147	0.00205061	1.0 Cob_I_alamin_e + 1.0 H2O_c + 1.0 ATP_c = 1.0 H__c + 1.0 Orthophosphate_c + 1.0 ADP_c + 1.0 Cob_I_alamin_c
rxn05515	0.00205061	1.0 H2O_c + 1.0 ATP_c + 1.0 Cob_II_alamin_e = 1.0 Cob_II_alamin_c + 1.0 Orthophosphate_c + 1.0 ADP_c + 1.0 H__c
rxn05187	0.00205061	1.0 Vitamin_B12_e + 1.0 H2O_c + 1.0 ATP_c = 1.0 H__c + 1.0 Orthophosphate_c + 1.0 ADP_c + 1.0 Vitamin_B12_c
t_cpd03424	0.00205061	1.0 Vitamin_B12_e + 1.0 H2O_c + 1.0 ATP_c = 1.0 H__c + 1.0 Orthophosphate_c + 1.0 ADP_c + 1.0 Vitamin_B12_c
t_cpd00635	0.00205061	1.0 Cob_I_alamin_e + 1.0 H2O_c + 1.0 ATP_c = 1.0 H__c + 1.0 Orthophosphate_c + 1.0 ADP_c + 1.0 Cob_I_alamin_c
t_cpd00423	0.00205061	1.0 H2O_c + 1.0 ATP_c + 1.0 Cob_II_alamin_e = 1.0 Cob_II_alamin_c + 1.0 Orthophosphate_c + 1.0 ADP_c + 1.0 H__c
rxn08656	0.00202624	1.0 Glycolate_c + 1.0 Menaquinone_8_c = 1.0 Glyoxylate_c + 1.0 Menaquinol_8_c
rxn05106	0.00202624	1.0 H2O_c + 1.0 2_Hydroxy_3_keto_5_methylthiopentenyl_1_phosphate_c = 1.0 H__c + 1.0 Orthophosphate_c + 1.0 1_2_Dihydroxy_5__methylthio_pent_1_en_3_one_c
rxn05105	0.00202624	1.0 H__c + 1.0 2_Hydroxy_3_keto_5_methylthiopentenyl_1_phosphate_c = 1.0 2_3_Diketo_5_methylthiopentyl_1_phosphate_c
rxn00605	0.00201157	1.0 D_Glucose_6_phosphate_c + 1.0 UDP_glucose_c = 1.0 UDP_c + 1.0 alpha_alpha__Trehalose_6_phosphate_c
rxn01297	0.00197862	1.0 NAD__c + 1.0 H2O_c + 1.0 Hypoxanthine_c = 1.0 Xanthine_c + 1.0 NADH_c + 1.0 H__c
rxn06874	0.00194396	16.0 H2O_c + 8.0 Reduced_ferredoxin_c + 16.0 ATP_c + 1.0 Nitrogen_c = 1.0 Hydrogen_c + 16.0 Orthophosphate_c + 8.0 Oxidized_ferredoxin_c + 2.0 NH3_c + 16.0 ADP_c + 6.0 H__c
rxn00926	0.00194396	1.0 H__c + 1.0 H2O_c + 1.0 Adenine_c = 1.0 NH3_c + 1.0 Hypoxanthine_c
rxn00202	0.00194396	1.0 H2O_c + 1.0 Acetyl_CoA_c + 1.0 2_Oxoglutarate_c = 1.0 H__c + 1.0 CoA_c + 1.0 2_Hydroxybutane_1_2_4_tricarboxylate_c
rxn01985	0.00172126	1.0 H__c + 1.0 Orthophosphate_c + 1.0 Deoxyinosine_c = 1.0 Hypoxanthine_c + 1.0 2_Deoxy_D_ribose_1_phosphate_c
rxn00065	0.00167284	1.0 ATP_c = 1.0 Diphosphate_c + 1.0 3__5__Cyclic_AMP_c
rxn01858	0.00166398	1.0 H__c + 1.0 H2O_c + 1.0 Deoxyadenosine_c = 1.0 Deoxyinosine_c + 1.0 NH3_c
rxn01137	0.00166398	1.0 H__c + 1.0 H2O_c + 1.0 Adenosine_c = 1.0 Inosine_c + 1.0 NH3_c
rxn05387	0.00164058	1.0 H__c + 1.0 5_methyl_trans_hex_2_enoyl_ACP_c + 1.0 NADPH_c = 1.0 5_methyl_hexanoyl_ACP_c + 1.0 NADP__c
rxn05370	0.00164058	1.0 H__c + 1.0 8_methyl_trans_dec_2_enoyl_ACP_c + 1.0 NADPH_c = 1.0 8_methyl_decanoyl_ACP_c + 1.0 NADP__c
rxn00616	0.00160262	1.0 sn_Glycerol_3_phosphate_c + 1.0 FAD_c = 1.0 Glycerone_phosphate_c + 1.0 FADH2_c
rxn05463	0.00159949	1.0 trans_Octodec_2_enoyl_ACP_c + 1.0 NADPH_c + 1.0 H__c = 1.0 Octodecanoyl_ACP_c + 1.0 NADP__c
rxn05432	0.00159949	1.0 H__c + 1.0 14_methyl_trans_pentadec_2_enoyl_ACP_c + 1.0 NADPH_c = 1.0 NADP__c + 1.0 14_methyl_pentadecanoyl_ACP_c
rxn05428	0.00159949	1.0 H__c + 1.0 12_methyl_trans_tridec_2_enoyl_ACP_c + 1.0 NADPH_c = 1.0 12_methyl_tridecanoyl_ACP_c + 1.0 NADP__c
rxn05424	0.00159949	1.0 H__c + 1.0 10_methyl_trans_undec_2_enoyl_ACP_c + 1.0 NADPH_c = 1.0 10_methyl_undecanoyl_ACP_c + 1.0 NADP__c
rxn05420	0.00159949	1.0 H__c + 1.0 8_methyl_trans_non_2_enoyl_ACP_c + 1.0 NADPH_c = 1.0 8_methyl_nonanoyl_ACP_c + 1.0 NADP__c
rxn05416	0.00159949	1.0 NADPH_c + 1.0 6_methyl_trans_hept_2_enoyl_ACP_c + 1.0 H__c = 1.0 6_methyl_heptanoyl_ACP_c + 1.0 NADP__c
rxn05412	0.00159949	1.0 4_methyl_trans_pent_2_enoyl_ACP_c + 1.0 H__c + 1.0 NADPH_c = 1.0 4_methyl_pentanoyl_ACP_c + 1.0 NADP__c
rxn05357	0.00159949	1.0 H__c + 1.0 trans_Hex_2_enoyl__acp__c + 1.0 NADPH_c = 1.0 Hexanoyl__acp__c + 1.0 NADP__c
rxn05356	0.00159949	1.0 trans_Dec_2_enoyl__acp__c + 1.0 H__c + 1.0 NADPH_c = 1.0 Decanoyl__acp__c + 1.0 NADP__c
rxn05355	0.00159949	1.0 H__c + 1.0 NADPH_c + 1.0 trans_Dodec_2_enoyl__acp__c = 1.0 Dodecanoyl__acyl_carrier_protein__c + 1.0 NADP__c
rxn05354	0.00159949	1.0 trans_Hexadec_2_enoyl__acp__c + 1.0 H__c + 1.0 NADPH_c = 1.0 Hexadecanoyl__acp__c + 1.0 NADP__c
rxn05353	0.00159949	1.0 But_2_enoyl__acyl_carrier_protein__c + 1.0 NADPH_c + 1.0 H__c = 1.0 NADP__c + 1.0 Butyryl__acp__c
rxn05352	0.00159949	1.0 H__c + 1.0 trans_Oct_2_enoyl__acp__c + 1.0 NADPH_c = 1.0 Octanoyl__acp__c + 1.0 NADP__c
rxn05351	0.00159949	1.0 H__c + 1.0 NADPH_c + 1.0 trans_Tetradec_2_enoyl__acp__c = 1.0 Tetradecanoyl__acp__c + 1.0 NADP__c
rxn05104	0.00159476	1.0 S_Methyl_5_thio_D_ribulose_1_phosphate_c = 1.0 H2O_c + 1.0 2_3_Diketo_5_methylthiopentyl_1_phosphate_c
rxn05092	0.00159476	1.0 1_2_Dihydroxy_5__methylthio_pent_1_en_3_one_c + 1.0 Oxygen_c = 1.0 H__c + 1.0 4_Methylthio_2_oxobutanoic_acid_c + 1.0 Formate_c
rxn03644	0.00158891	1.0 D_arabino_Hex_3_ulose_6_phosphate_c = 1.0 D_Fructose_6_phosphate_c
rxn03643	0.00158891	1.0 Formaldehyde_c + 1.0 D_Ribulose_5_phosphate_c = 1.0 D_arabino_Hex_3_ulose_6_phosphate_c
rxn01446	0.00151871	1.0 H__c + 1.0 Orthophosphate_c + 1.0 Deoxyguanosine_c = 1.0 Guanine_c + 1.0 2_Deoxy_D_ribose_1_phosphate_c
rxn05571	0.00148815	1.0 D_Gluconic_acid_e + 1.0 H__e = 1.0 H__c + 1.0 D_Gluconic_acid_c
rxn10447	0.00147079	1.0 H2O_c + 1.0 Calcium_e + 1.0 ATP_c = 1.0 H__c + 1.0 Orthophosphate_c + 1.0 Calcium_c + 1.0 ADP_c
rxn01930	0.00141336	1.0 H2O_c + 1.0 3_Hydroxy_L_kynurenine_c = 1.0 L_Alanine_c + 1.0 H__c + 1.0 3_Hydroxyanthranilate_c
rxn00478	0.00141336	1.0 L_Tryptophan_c + 1.0 Oxygen_c = 1.0 L_Formylkynurenine_c
rxn00137	0.00138127	1.0 Adenosine_3__5__bisphosphate_c + 1.0 H2O_c = 1.0 H__c + 1.0 Orthophosphate_c + 1.0 AMP_c
rxn06022	0.00138127	1.0 H2O_c + 1.0 Acyl_carrier_protein_c = 1.0 Apo__acyl_carrier_protein__c + 1.0 Pantetheine_4__phosphate_c
rxn01109	0.0013635	1.0 beta_D_Glucose_c + 1.0 NADP__c = 1.0 D_Glucono_1_5_lactone_c + 1.0 H__c + 1.0 NADPH_c
rxn01108	0.0013635	1.0 beta_D_Glucose_c + 1.0 NAD__c = 1.0 D_Glucono_1_5_lactone_c + 1.0 H__c + 1.0 NADH_c
rxn00022	0.00134669	1.0 H2O_c + 1.0 Maltose_c = 2.0 D_Glucose_c
rxn00775	0.00131341	1.0 H2O_c + 1.0 ADP_ribose_c = 1.0 AMP_c + 1.0 D_Ribose_5_phosphate_c
rxn00792	0.00130205	1.0 Diphosphate_c + 1.0 Biotinyl_5__AMP_c = 1.0 Biotin_c + 1.0 ATP_c + 1.0 H__c
rxn05209	0.00129978	1.0 Sodium_e + 1.0 H__c = 1.0 Sodium_c + 1.0 H__e
rxn01187	0.00125418	1.0 D_Xylulose_5_phosphate_c + 1.0 Orthophosphate_c + 1.0 H__c = 1.0 H2O_c + 1.0 Acetyl_phosphate_c + 1.0 D_Glyceraldehyde_3_phosphate_c
rxn01630	0.00116314	1.0 5_Aminopentanamide_c + 1.0 H2O_c = 1.0 5_Aminopentanoate_c + 1.0 NH3_c
rxn07584	0.00116266	1.0 H__c + 1.0 Lipoate_c + 1.0 ATP_c = 1.0 Lipoyl_AMP_c + 1.0 Diphosphate_c
rxn00691	0.00115193	1.0 10_Formyltetrahydrofolate_c + 1.0 H2O_c = 1.0 H__c + 1.0 Formate_c + 1.0 Tetrahydrofolate_c
rxn03953	0.00113676	1.0 NAD__c + 1.0 L_Idonate_c = 1.0 H__c + 1.0 NADH_c + 1.0 5_Dehydro_D_gluconate_c
rxn00182	0.00112078	1.0 NAD__c + 1.0 H2O_c + 1.0 L_Glutamate_c = 1.0 H__c + 1.0 2_Oxoglutarate_c + 1.0 NADH_c + 1.0 NH3_c
rxn00196	0.00102986	1.0 H2O_c + 1.0 2_5_Dioxopentanoate_c + 1.0 NADP__c = 2.0 H__c + 1.0 2_Oxoglutarate_c + 1.0 NADPH_c
rxn05382	0.00102896	1.0 H__c + 1.0 14_methyl_trans_hexa_dec_2_enoyl_ACP_c + 1.0 NADPH_c = 1.0 14_methyl_hexa_decanoyl_ACP_c + 1.0 NADP__c
rxn05399	0.00101234	1.0 H__c + 1.0 11_methyl_trans_dodec_2_enoyl_ACP_c + 1.0 NADPH_c = 1.0 11_methyl_dodecanoyl_ACP_c + 1.0 NADP__c
rxn05366	0.00101234	1.0 H__c + 1.0 6_methyl_trans_oct_2_enoyl_ACP_c + 1.0 NADPH_c = 1.0 6_methyl_octanoyl_ACP_c + 1.0 NADP__c
t_cpd00069	0.000997531	1.0 L_Tyrosine_e + 1.0 H__e = 1.0 H__c + 1.0 L_Tyrosine_c
t_cpd00066	0.000997531	1.0 L_Phenylalanine_e + 1.0 H__e = 1.0 H__c + 1.0 L_Phenylalanine_c
rxn05663	0.000997531	1.0 L_Tryptophan_e + 1.0 H__e = 1.0 L_Tryptophan_c + 1.0 H__c
rxn05306	0.000997531	1.0 L_Phenylalanine_e + 1.0 H__e = 1.0 H__c + 1.0 L_Phenylalanine_c
rxn05301	0.000997531	1.0 L_Tyrosine_e + 1.0 H__e = 1.0 H__c + 1.0 L_Tyrosine_c
rxn10315	0.000946029	1.0 Isohexadecanoyllipoteichoic_acid__n_24___linked__unsubstituted_c + 24.0 UDP_N_acetyl_D_glucosamine_c = 24.0 UDP_c + 1.0 Isohexadecanoyllipoteichoic_acid__n_24___linked__N_acetyl_D_glucosamine_c
rxn10314	0.000946029	24.0 UDP_N_acetyl_D_glucosamine_c + 1.0 Anteisopentadecanoyllipoteichoic_acid__n_24___linked__unsubstituted_c = 1.0 Anteisopentadecanoyllipoteichoic_acid__n_24___linked__N_acetyl_D_glucosamine_c + 24.0 UDP_c
rxn10313	0.000946029	24.0 UDP_N_acetyl_D_glucosamine_c + 1.0 Isopentadecanoyllipoteichoic_acid__n_24___linked__unsubstituted_c = 1.0 Isopentadecanoyllipoteichoic_acid__n_24___linked__N_acetyl_D_glucosamine_c + 24.0 UDP_c
rxn10312	0.000946029	24.0 UDP_N_acetyl_D_glucosamine_c + 1.0 Isotetradecanoyllipoteichoic_acid__n_24___linked__unsubstituted_c = 24.0 UDP_c + 1.0 Isotetradecanoyllipoteichoic_acid__n_24___linked__N_acetyl_D_glucosamine_c
rxn10308	0.000946029	24.0 UDP_N_acetyl_D_glucosamine_c + 1.0 Myristoyllipoteichoic_acid__n_24___linked__unsubstituted_c = 24.0 UDP_c + 1.0 Myristoyllipoteichoic_acid__n_24___linked__N_acetyl_D_glucosamine_c
rxn10307	0.000946029	24.0 UDP_N_acetyl_D_glucosamine_c + 1.0 Palmitoyllipoteichoic_acid__n_24___linked__unsubstituted_c = 24.0 UDP_c + 1.0 Palmitoyllipoteichoic_acid__n_24___linked__N_acetyl_D_glucosamine_c
rxn00548	0.000934361	1.0 H__c + 1.0 Orthophosphate_c + 1.0 D_Fructose_6_phosphate_c = 1.0 H2O_c + 1.0 Acetyl_phosphate_c + 1.0 D_Erythrose_4_phosphate_c
rxn05149	0.000850918	1.0 Manganese_e + 1.0 H2O_c + 1.0 ATP_c = 1.0 H__c + 1.0 Orthophosphate_c + 1.0 ADP_c + 1.0 Manganese_c
rxn05378	0.000812443	1.0 H__c + 1.0 12_methyl_trans_tetra_dec_2_enoyl_ACP_c + 1.0 NADPH_c = 1.0 12_methyl_tetra_decanoyl_ACP_c + 1.0 NADP__c
rxn05307	0.000809995	1.0 L_Serine_e + 1.0 H__e = 1.0 H__c + 1.0 L_Serine_c
rxn05436	0.000800021	1.0 10_methyl_trans_dodec_2_enoyl_ACP_c + 1.0 NADH_c + 1.0 H__c = 1.0 NAD__c + 1.0 10_methyl_dodecanoyl_ACP_c
rxn06023	0.000787206	1.0 Apo__acyl_carrier_protein__c + 1.0 CoA_c = 1.0 Adenosine_3__5__bisphosphate_c + 1.0 Acyl_carrier_protein_c
rxn05391	0.000736374	1.0 7_methyl_trans_oct_2_enoyl_ACP_c + 1.0 NADPH_c + 1.0 H__c = 1.0 7_methyl_octanoyl_ACP_c + 1.0 NADP__c
rxn05292	0.00072429	1.0 Fe3__e = 1.0 Fe3__c
t_cpd00129	0.000699143	1.0 Sodium_e + 1.0 L_Proline_e = 1.0 L_Proline_c + 1.0 Sodium_c
rxn03630	0.000648545	1.0 2_Oxoglutarate_c + 1.0 Taurine_c + 1.0 Oxygen_c = 1.0 Succinate_c + 1.0 Sulfite_c + 1.0 Aminoacetaldehyde_c + 1.0 CO2_c
rxn05287	0.000648067	1.0 Isopentenyl_diphosphate_c + 1.0 Geranylgeranyl_diphosphate_c = 1.0 Diphosphate_c + 1.0 all_trans_Pentaprenyl_diphosphate_c
rxn03892	0.000648067	1.0 Isopentenyl_diphosphate_c + 1.0 all_trans_Pentaprenyl_diphosphate_c = 1.0 Diphosphate_c + 1.0 all_trans_Hexaprenyl_diphosphate_c
rxn03891	0.000648067	1.0 Isopentenyl_diphosphate_c + 1.0 all_trans_Hexaprenyl_diphosphate_c = 1.0 all_trans_Heptaprenyl_diphosphate_c + 1.0 Diphosphate_c
rxn00242	0.000579126	1.0 H2O_c + 1.0 Guanosine_3__5__bis_diphosphate__c = 1.0 Diphosphate_c + 1.0 GDP_c
rxn01134	0.0005767	1.0 Maltose_c = 1.0 alpha_alpha_Trehalose_c
rxn05459	0.000569163	1.0 CoA_c + 1.0 Octodecanoyl_ACP_c = 1.0 Stearoyl_CoA_c + 1.0 Acyl_carrier_protein_c
rxn05458	0.000569163	1.0 Hexadecanoyl__acp__c + 1.0 CoA_c = 1.0 Palmitoyl_CoA_c + 1.0 Acyl_carrier_protein_c
rxn05457	0.000569163	1.0 Tetradecanoyl__acp__c + 1.0 CoA_c = 1.0 Tetradecanoyl_CoA_c + 1.0 Acyl_carrier_protein_c
rxn05456	0.000569163	1.0 CoA_c + 1.0 14_methyl_pentadecanoyl_ACP_c = 1.0 fa6coa_c + 1.0 Acyl_carrier_protein_c
rxn05455	0.000569163	1.0 12_methyl_tridecanoyl_ACP_c + 1.0 CoA_c = 1.0 fa1coa_c + 1.0 Acyl_carrier_protein_c
rxn05453	0.000569163	1.0 CoA_c + 1.0 13_methyl_tetra_decanoyl_ACP_c = 1.0 Acyl_carrier_protein_c + 1.0 fa3coa_c
rxn05451	0.000569163	1.0 CoA_c + 1.0 12_methyl_tetra_decanoyl_ACP_c = 1.0 fa4coa_c + 1.0 Acyl_carrier_protein_c
rxn05408	0.000569163	1.0 2_Methylpropanoyl_CoA_c + 1.0 Acyl_carrier_protein_c = 1.0 CoA_c + 1.0 2_methylpropionyl_ACP_c
rxn05231	0.000549911	1.0 trdrd_c + 1.0 ADP_c = 1.0 dADP_c + 1.0 H2O_c + 1.0 trdox_c
rxn10125	0.00054699	1.0 NADH_c + 1.0 NADP__c + 2.0 H__e = 1.0 NAD__c + 2.0 H__c + 1.0 NADPH_c
rxn00083	0.00054699	1.0 NAD__c + 1.0 NADPH_c = 1.0 NADH_c + 1.0 NADP__c
rxn07307	0.000540354	1.0 _2R__O_Phospho_3_sulfolactate_c = 1.0 Sulfite_c + 1.0 Phosphoenolpyruvate_c
rxn00950	0.000540354	1.0 H2O_c + 1.0 Cystathionine_c = 1.0 Pyruvate_c + 1.0 NH3_c + 1.0 L_Homocysteine_c
rxn10297	0.000501467	24.0 CDP_glycerol_c + 1.0 Diglucosyl_1_2_diisohexadecanoylglycerol_c = 1.0 Isohexadecanoyllipoteichoic_acid__n_24___linked__unsubstituted_c + 24.0 CMP_c
rxn10296	0.000501467	24.0 CDP_glycerol_c + 1.0 Diglucosyl_1_2_dianteisopentadecanoylglycerol_c = 1.0 Anteisopentadecanoyllipoteichoic_acid__n_24___linked__unsubstituted_c + 24.0 CMP_c
rxn10295	0.000501467	24.0 CDP_glycerol_c + 1.0 Diglucosyl_1_2_diisopentadecanoylglycerol_c = 1.0 Isopentadecanoyllipoteichoic_acid__n_24___linked__unsubstituted_c + 24.0 CMP_c
rxn10294	0.000501467	1.0 Diglucosyl_1_2_diisotetradecanoylglycerol_c + 24.0 CDP_glycerol_c = 24.0 CMP_c + 1.0 Isotetradecanoyllipoteichoic_acid__n_24___linked__unsubstituted_c
rxn10290	0.000501467	1.0 Diglucosyl_1_2_dimyristoylglycerol_c + 24.0 CDP_glycerol_c = 1.0 Myristoyllipoteichoic_acid__n_24___linked__unsubstituted_c + 24.0 CMP_c
rxn10289	0.000501467	24.0 CDP_glycerol_c + 1.0 Diglucosyl_1_2_dipalmitoylglycerol_c = 1.0 Palmitoyllipoteichoic_acid__n_24___linked__unsubstituted_c + 24.0 CMP_c
rxn00251	0.000467348	2.0 H__c + 1.0 Orthophosphate_c + 1.0 Oxaloacetate_c = 1.0 H2O_c + 1.0 CO2_c + 1.0 Phosphoenolpyruvate_c
rxn00438	0.000462921	1.0 Thiamin_monophosphate_c + 1.0 ATP_c = 1.0 Thiamin_diphosphate_c + 1.0 ADP_c
rxn00533	0.000462795	1.0 Acetyl_CoA_c + 1.0 HCO3__c + 1.0 ATP_c = 1.0 H__c + 1.0 Orthophosphate_c + 1.0 ADP_c + 1.0 Malonyl_CoA_c
rxn03919	0.000437173	1.0 D_glycero_D_manno_Heptose_1_7_bisphosphate_c + 1.0 H2O_c = 1.0 D_glycero_D_manno_Heptose_1_phosphate_c + 1.0 H__c + 1.0 Orthophosphate_c
rxn10770	0.000423915	1.0 NAD__c + 1.0 Choline_c = 1.0 H__c + 1.0 NADH_c + 1.0 Betaine_aldehyde_c
t_cpd00065	0.000387076	1.0 L_Tryptophan_e + 1.0 H__e = 1.0 L_Tryptophan_c + 1.0 H__c
rxn01867	0.000365665	1.0 NAD__c + 1.0 H2O_c + 1.0 Betaine_aldehyde_c = 2.0 H__c + 1.0 NADH_c + 1.0 Betaine_c
rxn01987	0.000321414	1.0 2_Deoxy_D_ribose_5_phosphate_c + 1.0 ADP_c = 1.0 Deoxyribose_c + 1.0 ATP_c
t_cpd00307	0.00027735	1.0 Cytosine_e + 1.0 H__e = 1.0 Cytosine_c + 1.0 H__c
rxn05527	0.00027735	1.0 Cytosine_e + 1.0 H__e = 1.0 Cytosine_c + 1.0 H__c
t_cpd01092	0.00027496	1.0 _S_____Allantoin_e + 1.0 H__e = 1.0 H__c + 1.0 _S_____Allantoin_c
t_cpd00092	0.00027496	1.0 Uracil_e + 1.0 H__e = 1.0 Uracil_c + 1.0 H__c
rxn09657	0.00027496	1.0 Thiamine_e + 1.0 H__e = 1.0 H__c + 1.0 Thiamine_c
rxn05682	0.00027496	1.0 _S_____Allantoin_e + 1.0 H__e = 1.0 H__c + 1.0 _S_____Allantoin_c
rxn01649	0.000257597	1.0 H__c + 1.0 Orthophosphate_c + 1.0 Xanthosine_c = 1.0 Xanthine_c + 1.0 alpha_D_Ribose_1_phosphate_c
t_cpd00149	0.000256851	1.0 Cobalt_e = 1.0 Cobalt_c
rxn00165	0.000251723	1.0 L_Serine_c = 1.0 Pyruvate_c + 1.0 NH3_c
rxn09979	0.000239606	1.0 H2O_c + 1.0 beta_Methylglucoside_c = 1.0 Methanol_c + 1.0 D_Glucose_c
rxn09978	0.000239606	1.0 H2O_c + 1.0 alpha_Methyl_D_glucoside_c = 1.0 Methanol_c + 1.0 D_Glucose_c
rxn10239	0.000180443	1.0 H2O_c + 1.0 1_2_dianteisoheptadecanoyl_sn_glycerol_3_phosphate_c = 1.0 H__c + 1.0 Orthophosphate_c + 1.0 1_2_Dianteisoheptadecanoyl_sn_glycerol_c
rxn10254	0.000180443	1.0 1_2_Dianteisoheptadecanoyl_sn_glycerol_c + 1.0 ATP_c = 1.0 1_2_dianteisoheptadecanoyl_sn_glycerol_3_phosphate_c + 1.0 ADP_c
rxn01859	0.000158182	1.0 H__c + 1.0 Orthophosphate_c + 1.0 Deoxyadenosine_c = 1.0 Adenine_c + 1.0 2_Deoxy_D_ribose_1_phosphate_c
rxn01799	0.000158182	1.0 H__c + 1.0 Orthophosphate_c + 1.0 Deoxyuridine_c = 1.0 Uracil_c + 1.0 2_Deoxy_D_ribose_1_phosphate_c
rxn01647	0.000158182	1.0 Orthophosphate_c + 1.0 Nicotinate_D_ribonucleoside_c = 1.0 Nicotinate_c + 1.0 alpha_D_Ribose_1_phosphate_c
rxn01646	0.000158182	1.0 N_Ribosylnicotinamide_c + 1.0 Orthophosphate_c = 1.0 Nicotinamide_c + 1.0 alpha_D_Ribose_1_phosphate_c
rxn01548	0.000158182	1.0 H__c + 1.0 Orthophosphate_c + 1.0 Guanosine_c = 1.0 Guanine_c + 1.0 alpha_D_Ribose_1_phosphate_c
rxn01358	0.000158182	1.0 H__c + 1.0 Orthophosphate_c + 1.0 Inosine_c = 1.0 Hypoxanthine_c + 1.0 alpha_D_Ribose_1_phosphate_c
rxn01138	0.000158182	1.0 H__c + 1.0 Orthophosphate_c + 1.0 Adenosine_c = 1.0 Adenine_c + 1.0 alpha_D_Ribose_1_phosphate_c
rxn00744	0.000151953	1.0 Glycerone_c + 1.0 ATP_c = 1.0 Glycerone_phosphate_c + 1.0 ADP_c
rxn02360	0.000151383	1.0 trans_4_Hydroxy_L_proline_c = 1.0 cis_4_Hydroxy_D_proline_c
t_cpd01080	0.000151133	1.0 Octadecanoic_acid_e + 1.0 H__e = 1.0 H__c + 1.0 Octadecanoic_acid_c
rxn10161	0.000151133	1.0 Octadecanoic_acid_e + 1.0 H__e = 1.0 H__c + 1.0 Octadecanoic_acid_c
rxn03918	0.00013233	1.0 D_glycero_D_manno_Heptose_7_phosphate_c + 1.0 ATP_c = 1.0 D_glycero_D_manno_Heptose_1_7_bisphosphate_c + 1.0 ADP_c
rxn03916	0.00013233	1.0 D_glycero_D_manno_Heptose_1_phosphate_c + 1.0 ATP_c = 1.0 Diphosphate_c + 1.0 ADP_D_glycero_D_manno_heptose_c
rxn05618	0.000104798	1.0 Manganese_e + 1.0 H__e = 1.0 H__c + 1.0 Manganese_c
rxn03974	9.76967e-05	1.0 H__c + 1.0 NADH_c + 1.0 FMN_c = 1.0 flavin_mononucleotide_reduced_c + 1.0 NAD__c
rxn01544	6.69855e-05	1.0 Xanthine_c + 1.0 5_Phospho_alpha_D_ribose_1_diphosphate_c = 1.0 Diphosphate_c + 1.0 Xanthosine_5__phosphate_c
rxn00915	6.69855e-05	1.0 5_Phospho_alpha_D_ribose_1_diphosphate_c + 1.0 Guanine_c = 1.0 Diphosphate_c + 1.0 GMP_c
rxn05611	6.09406e-05	1.0 H__e + 1.0 D_Mannose_e = 1.0 H__c + 1.0 D_Mannose_c
rxn05225	6.09406e-05	1.0 H__c + 1.0 D_Glucose_e + 1.0 D_Mannose_c = 1.0 H__e + 1.0 D_Glucose_c + 1.0 D_Mannose_e
t_cpd00118	5.16737e-05	1.0 H2O_c + 1.0 Putrescine_e + 1.0 ATP_c = 1.0 H__c + 1.0 Orthophosphate_c + 1.0 Putrescine_c + 1.0 ADP_c
rxn05175	5.16737e-05	1.0 H2O_c + 1.0 Spermidine_e + 1.0 ATP_c = 1.0 H__c + 1.0 Orthophosphate_c + 1.0 Spermidine_c + 1.0 ADP_c
rxn05163	5.16737e-05	1.0 H2O_c + 1.0 Putrescine_e + 1.0 ATP_c = 1.0 H__c + 1.0 Orthophosphate_c + 1.0 Putrescine_c + 1.0 ADP_c
rxn05197	4.02785e-05	1.0 Uracil_e + 1.0 H__e = 1.0 Uracil_c + 1.0 H__c
rxn00400	2.75318e-05	1.0 L_Arginine_c + 1.0 NADPH_c + 1.0 Oxygen_c = 1.0 H2O_c + 1.0 N__omega__Hydroxyarginine_c + 1.0 NADP__c
rxn00082	2.75318e-05	1.0 NADPH_c + 2.0 N__omega__Hydroxyarginine_c + 1.0 Oxygen_c = 2.0 L_Citrulline_c + 3.0 H__c + 1.0 NADP__c + 2.0 Nitric_oxide_c
rxn03534	2.40532e-05	1.0 H2O_c + 1.0 Precorrin_5_c + 1.0 S_Adenosyl_L_methionine_c = 2.0 H__c + 1.0 S_Adenosyl_L_homocysteine_c + 1.0 Acetate_c + 1.0 Precorrin_6X_c
rxn00151	2.29344e-05	1.0 Pyruvate_c + 1.0 H__c + 1.0 Orthophosphate_c + 1.0 ATP_c = 1.0 Diphosphate_c + 1.0 AMP_c + 1.0 Phosphoenolpyruvate_c
t_cpd00281	2.2841e-05	1.0 4_Aminobutanoate_e + 1.0 H__e = 1.0 H__c + 1.0 4_Aminobutanoate_c
rxn04020	1.64922e-05	1.0 H__c + 1.0 Orthophosphate_c + 1.0 alpha_alpha__Trehalose_6_phosphate_c = 1.0 D_Glucose_6_phosphate_c + 1.0 beta_D_Glucose_1_phosphate_c
rxn05403	1.5089e-05	1.0 13_methyl_trans_tetra_dec_2_enoyl_ACP_c + 1.0 H__c + 1.0 NADPH_c = 1.0 13_methyl_tetra_decanoyl_ACP_c + 1.0 NADP__c
rxn05206	1.23678e-05	1.0 Potassium_e = 1.0 Potassium_c
rxn05374	1.55777e-06	1.0 10_methyl_trans_dodec_2_enoyl_ACP_c + 1.0 NADPH_c + 1.0 H__c = 1.0 10_methyl_dodecanoyl_ACP_c + 1.0 NADP__c
rxn00211	1.24187e-06	2.0 NAD__c + 1.0 H2O_c + 1.0 UDP_glucose_c = 3.0 H__c + 1.0 UDP_glucuronate_c + 2.0 NADH_c
rxn03541	1.19616e-06	1.0 Adenosyl_cobyrinate_hexaamide_c + 1.0 _R__1_Aminopropan_2_ol_c = 1.0 H2O_c + 1.0 Adenosyl_cobinamide_c
rxn01648	1.10415e-06	1.0 H__c + 1.0 Orthophosphate_c + 1.0 Cytidine_c = 1.0 Cytosine_c + 1.0 alpha_D_Ribose_1_phosphate_c
rxn00560	1.10415e-06	1.0 Urea_c + 1.0 HCO3__c + 1.0 ATP_c = 1.0 H__c + 1.0 Orthophosphate_c + 1.0 Urea_1_carboxylate_c + 1.0 ADP_c
rxn02322	5.37155e-07	1.0 _R__5_Phosphomevalonate_c + 1.0 ATP_c = 1.0 _R__5_Diphosphomevalonate_c + 1.0 ADP_c
rxn01501	5.37155e-07	2.0 H__c + 2.0 NADPH_c + 1.0 _S__3_Hydroxy_3_methylglutaryl_CoA_c = 1.0 _R__Mevalonate_c + 1.0 CoA_c + 2.0 NADP__c
rxn01450	5.37155e-07	1.0 Indolepyruvate_c + 1.0 H__c = 1.0 CO2_c + 1.0 Indole_3_acetaldehyde_c
rxn00829	5.37155e-07	1.0 _R__5_Diphosphomevalonate_c + 1.0 ATP_c = 1.0 Isopentenyl_diphosphate_c + 1.0 Orthophosphate_c + 1.0 CO2_c + 1.0 ADP_c
rxn00777	5.37155e-07	1.0 D_Ribose_5_phosphate_c = 1.0 D_Ribulose_5_phosphate_c
trS_Adenosyl_L_homocysteine_c_ext	0	1.0 S_Adenosyl_L_homocysteine_c = 1.0 S_Adenosyl_L_homocysteine_ext
trErythromycin_c_ext	0	1.0 Erythromycin_c = 1.0 Erythromycin_ext
rxn12847	0	1.0 H2O_c + 1.0 Gly_Tyr_c = 1.0 L_Tyrosine_c + 1.0 Glycine_c
rxn12846	0	1.0 H2O_c + 1.0 Gly_Phe_c = 1.0 L_Phenylalanine_c + 1.0 Glycine_c
rxn12845	0	1.0 Gly_Leu_c + 1.0 H2O_c = 1.0 L_Leucine_c + 1.0 Glycine_c
rxn12844	0	1.0 H2O_c + 1.0 Gly_Cys_c = 1.0 L_Cysteine_c + 1.0 Glycine_c
rxn12646	0	1.0 H2O_c + 1.0 Gly_Gln_c = 1.0 L_Glutamine_c + 1.0 Glycine_c
rxn12645	0	1.0 H2O_c + 1.0 gly_asn_L_c = 1.0 Glycine_c + 1.0 L_Asparagine_c
rxn12644	0	1.0 H2O_c + 1.0 ala_L_Thr_L_c = 1.0 L_Threonine_c + 1.0 L_Alanine_c
rxn12643	0	1.0 Ala_Leu_c + 1.0 H2O_c = 1.0 L_Alanine_c + 1.0 L_Leucine_c
rxn12642	0	1.0 Ala_His_c + 1.0 H2O_c = 1.0 L_Alanine_c + 1.0 L_Histidine_c
rxn12641	0	1.0 L_alanylglycine_c + 1.0 H2O_c = 1.0 L_Alanine_c + 1.0 Glycine_c
rxn12640	0	1.0 H2O_c + 1.0 ala_L_glu_L_c = 1.0 L_Alanine_c + 1.0 L_Glutamate_c
rxn12639	0	1.0 H2O_c + 1.0 Ala_Gln_c = 1.0 L_Glutamine_c + 1.0 L_Alanine_c
rxn12638	0	1.0 H2O_c + 1.0 gly_pro_L_c = 1.0 H__c + 1.0 L_Proline_c + 1.0 Glycine_c
rxn12637	0	1.0 H2O_c + 1.0 gly_asp_L_c = 1.0 L_Aspartate_c + 1.0 Glycine_c
rxn12636	0	1.0 met_L_ala_L_c + 1.0 H__c + 1.0 H2O_c = 1.0 L_Alanine_c + 1.0 L_Methionine_c
rxn12635	0	1.0 H2O_c + 1.0 Gly_Met_c = 1.0 L_Methionine_c + 1.0 Glycine_c
rxn12634	0	1.0 gly_glu_L_c + 1.0 H2O_c = 1.0 L_Glutamate_c + 1.0 Glycine_c
rxn12633	0	1.0 H2O_c + 1.0 ala_L_asp_L_c = 1.0 L_Alanine_c + 1.0 L_Aspartate_c
rxn12512	0	1.0 D_4__Phosphopantothenate_c + 1.0 L_Cysteine_c + 1.0 ATP_c = 1.0 _R__4__Phosphopantothenoyl_L_cysteine_c + 1.0 Diphosphate_c + 1.0 AMP_c
rxn12510	0	1.0 Pantothenate_c + 1.0 ATP_c = 1.0 D_4__Phosphopantothenate_c + 1.0 ADP_c
rxn10954	0	23.0 H__c + 7.0 Malonyl__acyl_carrier_protein__c + 16.0 NADPH_c + 1.0 Acetoacetyl__acp__c = 8.0 H2O_c + 7.0 CO2_c + 1.0 Octadecanoyl_ACP_c + 7.0 Acyl_carrier_protein_c + 16.0 NADP__c
rxn10571	0	1.0 H2O_c + 1.0 ATP_c + 1.0 Magnesium_e = 1.0 Magnesium_c + 1.0 Orthophosphate_c + 1.0 ADP_c + 1.0 H__c
rxn10481	0	1.0 H2O_c + 1.0 Copper2_e + 1.0 ATP_c = 1.0 H__c + 1.0 Orthophosphate_c + 1.0 Copper2_c + 1.0 ADP_c
rxn10473	0	1.0 Cl__e = 1.0 Cl__c
rxn10320	0	24.0 D_Alanine_c + 1.0 Anteisoheptadecanoyllipoteichoic_acid__n_24___linked__unsubstituted_c + 24.0 ATP_c = 24.0 Diphosphate_c + 24.0 AMP_c + 1.0 Anteisoheptadecanoyllipoteichoic_acid__n_24___linked__D_alanine_substituted_c
rxn10319	0	24.0 D_Alanine_c + 1.0 Isoheptadecanoyllipoteichoic_acid__n_24___linked__unsubstituted_c + 24.0 ATP_c = 24.0 Diphosphate_c + 24.0 AMP_c + 1.0 Isoheptadecanoyllipoteichoic_acid__n_24___linked__D_alanine_substituted_c
rxn10318	0	24.0 D_Alanine_c + 1.0 Stearoyllipoteichoic_acid__n_24___linked__unsubstituted_c + 24.0 ATP_c = 24.0 Diphosphate_c + 1.0 Stearoyllipoteichoic_acid__n_24___linked__D_alanine_substituted_c + 24.0 AMP_c
rxn10311	0	1.0 Anteisoheptadecanoyllipoteichoic_acid__n_24___linked__unsubstituted_c + 24.0 UDP_N_acetyl_D_glucosamine_c = 24.0 UDP_c + 1.0 Anteisoheptadecanoyllipoteichoic_acid__n_24___linked__N_acetyl_D_glucosamine_c
rxn10310	0	1.0 Isoheptadecanoyllipoteichoic_acid__n_24___linked__unsubstituted_c + 24.0 UDP_N_acetyl_D_glucosamine_c = 24.0 UDP_c + 1.0 Isoheptadecanoyllipoteichoic_acid__n_24___linked__N_acetyl_D_glucosamine_c
rxn10309	0	24.0 UDP_N_acetyl_D_glucosamine_c + 1.0 Stearoyllipoteichoic_acid__n_24___linked__unsubstituted_c = 24.0 UDP_c + 1.0 Stearoyllipoteichoic_acid__n_24___linked__N_acetyl_D_glucosamine_c
rxn10302	0	1.0 Anteisoheptadecanoyllipoteichoic_acid__n_24___linked__unsubstituted_c + 24.0 UDP_glucose_c = 24.0 UDP_c + 1.0 Anteisoheptadecanoyllipoteichoic_acid__n_24___linked__glucose_substituted_c
rxn10301	0	1.0 Isoheptadecanoyllipoteichoic_acid__n_24___linked__unsubstituted_c + 24.0 UDP_glucose_c = 24.0 UDP_c + 1.0 Isoheptadecanoyllipoteichoic_acid__n_24___linked__glucose_substituted_c
rxn10300	0	1.0 Stearoyllipoteichoic_acid__n_24___linked__unsubstituted_c + 24.0 UDP_glucose_c = 1.0 Stearoyllipoteichoic_acid__n_24___linked__glucose_substituted_c + 24.0 UDP_c
rxn10293	0	24.0 CDP_glycerol_c + 1.0 Diglucosyl_1_2_dianteisoheptadecanoylglycerol_c = 1.0 Anteisoheptadecanoyllipoteichoic_acid__n_24___linked__unsubstituted_c + 24.0 CMP_c
rxn10292	0	24.0 CDP_glycerol_c + 1.0 Diglucosyl_1_2_diisoheptadecanoylglycerol_c = 1.0 Isoheptadecanoyllipoteichoic_acid__n_24___linked__unsubstituted_c + 24.0 CMP_c
rxn10291	0	1.0 Diglucosyl_1_2_distearoylglycerol_c + 24.0 CDP_glycerol_c = 1.0 Stearoyllipoteichoic_acid__n_24___linked__unsubstituted_c + 24.0 CMP_c
rxn10284	0	1.0 1_2_Dianteisoheptadecanoyl_sn_glycerol_c + 1.0 UDP_glucose_c = 1.0 UDP_c + 1.0 Monoglucosyl_1_2_dianteisoheptadecanoylglycerol_c
rxn10283	0	1.0 1_2_Diisoheptadecanoyl_sn_glycerol_c + 1.0 UDP_glucose_c = 1.0 UDP_c + 1.0 Monoglucosyl_1_2_diisoheptadecanoylglycerol_c
rxn10282	0	1.0 1_2_Diacyl_sn_glycerol_dioctadecanoyl_c + 1.0 UDP_glucose_c = 1.0 UDP_c + 1.0 Monoglucosyl_1_2_distearoylglycerol_c
rxn10275	0	1.0 Monoglucosyl_1_2_dianteisoheptadecanoylglycerol_c + 1.0 UDP_glucose_c = 1.0 UDP_c + 1.0 Diglucosyl_1_2_dianteisoheptadecanoylglycerol_c
rxn10274	0	1.0 Monoglucosyl_1_2_diisoheptadecanoylglycerol_c + 1.0 UDP_glucose_c = 1.0 UDP_c + 1.0 Diglucosyl_1_2_diisoheptadecanoylglycerol_c
rxn10273	0	1.0 UDP_glucose_c + 1.0 Monoglucosyl_1_2_distearoylglycerol_c = 1.0 Diglucosyl_1_2_distearoylglycerol_c + 1.0 UDP_c
rxn10264	0	1.0 sn_Glycerol_3_phosphate_c + 1.0 CDP_1_2_diisohexadecanoylglycerol_c = 1.0 Diisohexadecanoylphosphatidylglycerophosphate_c + 1.0 CMP_c
rxn10263	0	1.0 sn_Glycerol_3_phosphate_c + 1.0 CDP_1_2_dianteisopentadecanoylglycerol_c = 1.0 Dianteisopentadecanoylphosphatidylglycerophosphate_c + 1.0 CMP_c
rxn10262	0	1.0 sn_Glycerol_3_phosphate_c + 1.0 CDP_1_2_diisopentadecanoylglycerol_c = 1.0 CMP_c + 1.0 Diisopentadecanoylphosphatidylglycerophosphate_c
rxn10261	0	1.0 sn_Glycerol_3_phosphate_c + 1.0 CDP_1_2_diisotetradecanoylglycerol_c = 1.0 CMP_c + 1.0 Diisotetradecanoylphosphatidylglycerophosphate_c
rxn10260	0	1.0 CDP_1_2_dianteisoheptadecanoylglycerol_c + 1.0 sn_Glycerol_3_phosphate_c = 1.0 Dianteisoheptadecanoylphosphatidylglycerophosphate_c + 1.0 CMP_c
rxn10259	0	1.0 sn_Glycerol_3_phosphate_c + 1.0 CDP_1_2_diisoheptadecanoylglycerol_c = 1.0 Diisoheptadecanoylphosphatidylglycerophosphate_c + 1.0 CMP_c
rxn10225	0	1.0 CTP_c + 1.0 1_2_diisohexadecanoyl_sn_glycerol_3_phosphate_c = 1.0 Diphosphate_c + 1.0 CDP_1_2_diisohexadecanoylglycerol_c
rxn10224	0	1.0 CTP_c + 1.0 1_2_dianteisopentadecanoyl_sn_glycerol_3_phosphate_c = 1.0 Diphosphate_c + 1.0 CDP_1_2_dianteisopentadecanoylglycerol_c
rxn10223	0	1.0 CTP_c + 1.0 1_2_diisopentadecanoyl_sn_glycerol_3_phosphate_c = 1.0 Diphosphate_c + 1.0 CDP_1_2_diisopentadecanoylglycerol_c
rxn10222	0	1.0 CTP_c + 1.0 1_2_diisotetradecanoyl_sn_glycerol_3_phosphate_c = 1.0 Diphosphate_c + 1.0 CDP_1_2_diisotetradecanoylglycerol_c
rxn10221	0	1.0 CTP_c + 1.0 1_2_dianteisoheptadecanoyl_sn_glycerol_3_phosphate_c = 1.0 CDP_1_2_dianteisoheptadecanoylglycerol_c + 1.0 Diphosphate_c
rxn10220	0	1.0 CTP_c + 1.0 1_2_diisoheptadecanoyl_sn_glycerol_3_phosphate_c = 1.0 Diphosphate_c + 1.0 CDP_1_2_diisoheptadecanoylglycerol_c
rxn10219	0	1.0 1_isohexadecanoyl_sn_glycerol_3_phosphate_c + 1.0 fa6coa_c = 1.0 1_2_diisohexadecanoyl_sn_glycerol_3_phosphate_c + 1.0 CoA_c
rxn10218	0	1.0 fa4coa_c + 1.0 1_anteisopentadecanoyl_sn_glycerol_3_phosphate_c = 1.0 CoA_c + 1.0 1_2_dianteisopentadecanoyl_sn_glycerol_3_phosphate_c
rxn10217	0	1.0 fa3coa_c + 1.0 1_isopentadecanoyl_sn_glycerol_3_phosphate_c = 1.0 CoA_c + 1.0 1_2_diisopentadecanoyl_sn_glycerol_3_phosphate_c
rxn10216	0	1.0 fa1coa_c + 1.0 1_isotetradecanoyl_sn_glycerol_3_phosphate_c = 1.0 1_2_diisotetradecanoyl_sn_glycerol_3_phosphate_c + 1.0 CoA_c
rxn10215	0	1.0 1_anteisoheptadecanoyl_sn_glycerol_3_phosphate_c + 1.0 fa12coa_c = 1.0 CoA_c + 1.0 1_2_dianteisoheptadecanoyl_sn_glycerol_3_phosphate_c
rxn10214	0	1.0 fa11coa_c + 1.0 1_isoheptadecanoyl_sn_glycerol_3_phosphate_c = 1.0 CoA_c + 1.0 1_2_diisoheptadecanoyl_sn_glycerol_3_phosphate_c
rxn10213	0	1.0 1_octadecanoyl_sn_glycerol_3_phosphate_c + 1.0 Stearoyl_CoA_c = 1.0 1_2_dioctadecanoyl_sn_glycerol_3_phosphate_c + 1.0 CoA_c
rxn10212	0	1.0 Tetradecanoyl_CoA_c + 1.0 1_tetradecanoyl_sn_glycerol_3_phosphate_c = 1.0 CoA_c + 1.0 1_2_ditetradecanoyl_sn_glycerol_3_phosphate_c
rxn10211	0	1.0 Palmitoyl_CoA_c + 1.0 1_hexadecanoyl_sn_glycerol_3_phosphate_c = 1.0 CoA_c + 1.0 1_2_dihexadecanoyl_sn_glycerol_3_phosphate_c
rxn10206	0	1.0 sn_Glycerol_3_phosphate_c + 1.0 fa12coa_c = 1.0 CoA_c + 1.0 1_anteisoheptadecanoyl_sn_glycerol_3_phosphate_c
rxn10205	0	1.0 sn_Glycerol_3_phosphate_c + 1.0 fa11coa_c = 1.0 CoA_c + 1.0 1_isoheptadecanoyl_sn_glycerol_3_phosphate_c
rxn10199	0	1.0 Undecaprenyl_diphospho_N_acetylmuramoyl__N_acetylglucosamine__L__alanyl_D_glutamyl_meso_2_6_diaminopimeloyl_D_alanyl_D_alanine_c + 1.0 Peptidoglycan_polymer__n_1_subunits__c = 1.0 Peptidoglycan_polymer__n_subunits__c + 1.0 di_trans_poly_cis_Undecaprenyl_diphosphate_c
rxn10197	0	1.0 H2O_c + 30.0 UDP_N_acetyl_D_galactosamine_c + 30.0 UDP_glucose_c = 30.0 UMP_c + 30.0 UDP_c + 1.0 tcam_c
rxn10196	0	1.0 Peptidoglycan_polymer__n_1_subunits__c + 1.0 45_Alanyl_phosphoglyceryl__N_Acetyl_beta_D_mannosaminyl_1_4_N_acetyl_D_glucosaminyldiphosphoundecaprenol_c = 1.0 glycerol_teichoic_acid__n_45___linked__D_ala_substituted_c + 1.0 di_trans_poly_cis_Undecaprenyl_phosphate_c
rxn10195	0	1.0 Peptidoglycan_polymer__n_1_subunits__c + 1.0 45_Glucosyl_phosphoglyceryl__N_Acetyl_beta_D_mannosaminyl_1_4_N_acetyl_D_glucosaminyldiphosphoundecaprenol_c = 1.0 glycerol_teichoic_acid__n_45___linked__glucose_substituted_c + 1.0 di_trans_poly_cis_Undecaprenyl_phosphate_c
rxn10194	0	1.0 Peptidoglycan_polymer__n_1_subunits__c + 1.0 45_Phosphoglyceryl__N_Acetyl_beta_D_mannosaminyl_1_4_N_acetyl_D_glucosaminyldiphosphoundecaprenol_c = 1.0 di_trans_poly_cis_Undecaprenyl_phosphate_c + 1.0 glycerol_teichoic_acid__n_45___linked__unsubstituted_c
rxn10193	0	1.0 45_Phosphoglyceryl__N_Acetyl_beta_D_mannosaminyl_1_4_N_acetyl_D_glucosaminyldiphosphoundecaprenol_c + 45.0 UDP_glucose_c = 45.0 UDP_c + 1.0 45_Glucosyl_phosphoglyceryl__N_Acetyl_beta_D_mannosaminyl_1_4_N_acetyl_D_glucosaminyldiphosphoundecaprenol_c
rxn10192	0	1.0 N_Acetyl_beta_D_mannosaminyl_1_4_N_acetyl_D__glucosaminyldiphosphoundecaprenol_c + 45.0 CDP_glycerol_c = 1.0 45_Phosphoglyceryl__N_Acetyl_beta_D_mannosaminyl_1_4_N_acetyl_D_glucosaminyldiphosphoundecaprenol_c + 45.0 CMP_c
rxn10191	0	45.0 D_Alanine_c + 1.0 45_Phosphoglyceryl__N_Acetyl_beta_D_mannosaminyl_1_4_N_acetyl_D_glucosaminyldiphosphoundecaprenol_c + 45.0 ATP_c = 45.0 Diphosphate_c + 45.0 AMP_c + 1.0 45_Alanyl_phosphoglyceryl__N_Acetyl_beta_D_mannosaminyl_1_4_N_acetyl_D_glucosaminyldiphosphoundecaprenol_c
rxn10126	0	1.0 FADH2_c + 1.0 Ubiquinone_8_c = 1.0 FAD_c + 1.0 Ubiquinol_8_c
rxn10113	0	2.5 H__c + 0.5 Oxygen_c + 1.0 Ubiquinol_8_c = 1.0 H2O_c + 1.0 Ubiquinone_8_c + 2.5 H__e
rxn10060	0	1.0 NAD__c + 1.0 dTTP_c = 1.0 dTDP_c + 1.0 NADP__c
rxn10042	0	1.0 Orthophosphate_c + 1.0 ADP_c + 4.0 H__e = 3.0 H__c + 1.0 H2O_c + 1.0 ATP_c
rxn09562	0	1.0 dATP_c + 1.0 GMP_c = 1.0 dADP_c + 1.0 GDP_c
rxn09310	0	1.0 L_Tyrosine_c + 1.0 L_Cysteine_c + 1.0 ATP_c + 1.0 1_Deoxy_D_xylulose_5_phosphate_c = 1.0 H2O_c + 1.0 4_Methyl_5__2_phosphoethyl__thiazole_c + 1.0 AMP_c + 1.0 L_Alanine_c + 1.0 4_Hydroxy_benzyl_alcohol_c + 1.0 CO2_c + 1.0 Diphosphate_c
rxn09272	0	1.0 Succinate_c + 1.0 Ubiquinone_8_c = 1.0 Fumarate_c + 1.0 Ubiquinol_8_c
rxn09240	0	1.0 Sulfate_c + 1.0 H2O_c + 1.0 GTP_c + 1.0 ATP_c = 1.0 Orthophosphate_c + 1.0 GDP_c + 1.0 Diphosphate_c + 1.0 Adenylyl_sulfate_c
rxn09114	0	1.0 sn_Glycerol_3_phosphate_c + 1.0 CDP_1_2_dioctadec_11_enoylglycerol_c = 1.0 Phosphatidylglycerophosphate_dioctadec_11_enoyl_c + 1.0 CMP_c
rxn09113	0	1.0 CDP_1_2_dioctadecanoylglycerol_c + 1.0 sn_Glycerol_3_phosphate_c = 1.0 CMP_c + 1.0 Phosphatidylglycerophosphate_dioctadecanoyl_c
rxn09112	0	1.0 sn_Glycerol_3_phosphate_c + 1.0 CDP_1_2_dihexadec_9_enoylglycerol_c = 1.0 Phosphatidylglycerophosphate_dihexadec_9_enoyl_c + 1.0 CMP_c
rxn09111	0	1.0 sn_Glycerol_3_phosphate_c + 1.0 CDP_1_2_dihexadecanoylglycerol_c = 1.0 Phosphatidylglycerophosphate_dihexadecanoyl_c + 1.0 CMP_c
rxn09110	0	1.0 CDP_1_2_ditetradec_7_enoylglycerol_c + 1.0 sn_Glycerol_3_phosphate_c = 1.0 CMP_c + 1.0 Phosphatidylglycerophosphate_ditetradec_7_enoyl_c
rxn09109	0	1.0 sn_Glycerol_3_phosphate_c + 1.0 CDP_1_2_ditetradecanoylglycerol_c = 1.0 CMP_c + 1.0 Phosphatidylglycerophosphate_ditetradecanoyl_c
rxn09108	0	1.0 sn_Glycerol_3_phosphate_c + 1.0 CDP_1_2_didodecanoylglycerol_c = 1.0 Phosphatidylglycerophosphate_didodecanoyl_c + 1.0 CMP_c
rxn08756	0	1.0 1_Hydroxy_2_methyl_2_butenyl_4_diphosphate_c + 1.0 H__c + 1.0 NADH_c = 1.0 NAD__c + 1.0 Isopentenyl_diphosphate_c + 1.0 H2O_c
rxn08528	0	1.0 Fumarate_c + 1.0 2_Demethylmenaquinol_8_c = 1.0 Succinate_c + 1.0 2_Demethylmenaquinone_8_c
rxn08527	0	1.0 Fumarate_c + 1.0 Menaquinol_8_c = 1.0 Succinate_c + 1.0 Menaquinone_8_c
rxn08352	0	1.0 1_Hydroxy_2_methyl_2_butenyl_4_diphosphate_c + 1.0 H__c + 1.0 NADH_c = 1.0 NAD__c + 1.0 H2O_c + 1.0 Dimethylallyl_diphosphate_c
rxn08336	0	1.0 Menaquinone_8_c + 1.0 _S__Dihydroorotate_c = 1.0 Orotate_c + 1.0 Menaquinol_8_c
rxn08335	0	1.0 _S__Dihydroorotate_c + 1.0 Ubiquinone_8_c = 1.0 Orotate_c + 1.0 Ubiquinol_8_c
rxn08312	0	1.0 CTP_c + 1.0 1_2_dioctadec_11_enoyl_sn_glycerol_3_phosphate_c = 1.0 Diphosphate_c + 1.0 CDP_1_2_dioctadec_11_enoylglycerol_c
rxn08311	0	1.0 CTP_c + 1.0 1_2_dioctadecanoyl_sn_glycerol_3_phosphate_c = 1.0 CDP_1_2_dioctadecanoylglycerol_c + 1.0 Diphosphate_c
rxn08310	0	1.0 CTP_c + 1.0 1_2_dihexadec_9_enoyl_sn_glycerol_3_phosphate_c = 1.0 Diphosphate_c + 1.0 CDP_1_2_dihexadec_9_enoylglycerol_c
rxn08309	0	1.0 CTP_c + 1.0 1_2_dihexadecanoyl_sn_glycerol_3_phosphate_c = 1.0 Diphosphate_c + 1.0 CDP_1_2_dihexadecanoylglycerol_c
rxn08308	0	1.0 CTP_c + 1.0 1_2_ditetradec_7_enoyl_sn_glycerol_3_phosphate_c = 1.0 CDP_1_2_ditetradec_7_enoylglycerol_c + 1.0 Diphosphate_c
rxn08307	0	1.0 CTP_c + 1.0 1_2_ditetradecanoyl_sn_glycerol_3_phosphate_c = 1.0 Diphosphate_c + 1.0 CDP_1_2_ditetradecanoylglycerol_c
rxn08306	0	1.0 CTP_c + 1.0 1_2_didodecanoyl_sn_glycerol_3_phosphate_c = 1.0 Diphosphate_c + 1.0 CDP_1_2_didodecanoylglycerol_c
rxn08089	0	1.0 Oleoyl__acyl_carrier_protein__c + 1.0 1_octadec_11_enoyl_sn_glycerol_3_phosphate_c = 1.0 1_2_dioctadec_11_enoyl_sn_glycerol_3_phosphate_c + 1.0 Acyl_carrier_protein_c
rxn08088	0	1.0 1_octadecanoyl_sn_glycerol_3_phosphate_c + 1.0 Octadecanoyl_ACP_c = 1.0 1_2_dioctadecanoyl_sn_glycerol_3_phosphate_c + 1.0 Acyl_carrier_protein_c
rxn08087	0	1.0 Hexadecenoyl_ACP_c + 1.0 1_hexadec_9_enoyl_sn_glycerol_3_phosphate_c = 1.0 1_2_dihexadec_9_enoyl_sn_glycerol_3_phosphate_c + 1.0 Acyl_carrier_protein_c
rxn08086	0	1.0 Palmitoyl_ACP_c + 1.0 1_hexadecanoyl_sn_glycerol_3_phosphate_c = 1.0 1_2_dihexadecanoyl_sn_glycerol_3_phosphate_c + 1.0 Acyl_carrier_protein_c
rxn08085	0	1.0 1_tetradec_7_enoyl_sn_glycerol_3_phosphate_c + 1.0 Tetradecenoyl_ACP_c = 1.0 1_2_ditetradec_7_enoyl_sn_glycerol_3_phosphate_c + 1.0 Acyl_carrier_protein_c
rxn08084	0	1.0 Tetradecanoyl__acp__c + 1.0 1_tetradecanoyl_sn_glycerol_3_phosphate_c = 1.0 Acyl_carrier_protein_c + 1.0 1_2_ditetradecanoyl_sn_glycerol_3_phosphate_c
rxn08083	0	1.0 Dodecanoyl__acyl_carrier_protein__c + 1.0 1_dodecanoyl_sn_glycerol_3_phosphate_c = 1.0 Acyl_carrier_protein_c + 1.0 1_2_didodecanoyl_sn_glycerol_3_phosphate_c
rxn08040	0	1.0 UDP_N_acetyl_D_glucosamine_c + 1.0 di_trans_poly_cis_Undecaprenyl_phosphate_c = 1.0 N_Acetyl_D_glucosaminyldiphosphoundecaprenol_c + 1.0 UMP_c
rxn06937	0	1.0 tRNA_Glu__c + 1.0 H__c + 1.0 L_Glutamate_c + 1.0 ATP_c = 1.0 L_Glutamyl_tRNA_Glu__c + 1.0 Diphosphate_c + 1.0 AMP_c
rxn06672	0	1.0 Holo__carboxylase__c + 1.0 HCO3__c + 1.0 ATP_c = 1.0 H__c + 1.0 Orthophosphate_c + 1.0 Carboxybiotin_carboxyl_carrier_protein_c + 1.0 ADP_c
rxn06591	0	1.0 L_Glutamyl_tRNA_Glu__c + 1.0 H__c + 1.0 NADPH_c = 1.0 tRNA_Glu__c + 1.0 _S__4_Amino_5_oxopentanoate_c + 1.0 NADP__c
rxn06493	0	1.0 H__c + 1.0 NADH_c + 1.0 Lipoylprotein_c = 1.0 NAD__c + 1.0 Dihydrolipoylprotein_c
rxn05902	0	3.0 H2O_c + 1.0 Hydrogen_sulfide_c + 3.0 Oxidized_ferredoxin_c = 1.0 Sulfite_c + 3.0 Reduced_ferredoxin_c + 7.0 H__c
rxn05667	0	1.0 Urea_e = 1.0 Urea_c
rxn05651	0	1.0 Sulfate_e + 1.0 H__e = 1.0 Sulfate_c + 1.0 H__c
rxn05555	0	1.0 Fe2__e + 1.0 H2O_c + 1.0 ATP_c = 1.0 H__c + 1.0 Orthophosphate_c + 1.0 Fe2__c + 1.0 ADP_c
rxn05468	0	1.0 Oxygen_e = 1.0 Oxygen_c
rxn05467	0	1.0 CO2_e = 1.0 CO2_c
rxn05465	0	1.0 Acyl_carrier_protein_c + 1.0 Malonyl_CoA_c = 1.0 Malonyl__acyl_carrier_protein__c + 1.0 CoA_c
rxn05454	0	1.0 CoA_c + 1.0 15_methyl_hexa_decanoyl_ACP_c = 1.0 fa11coa_c + 1.0 Acyl_carrier_protein_c
rxn05452	0	1.0 14_methyl_hexa_decanoyl_ACP_c + 1.0 CoA_c = 1.0 fa12coa_c + 1.0 Acyl_carrier_protein_c
rxn05406	0	1.0 15_methyl_3_hydroxy_hexa_decanoyl_ACP_c = 1.0 H2O_c + 1.0 15_methyl_trans_hexa_dec_2_enoyl_ACP_c
rxn05405	0	1.0 H__c + 1.0 NADPH_c + 1.0 15_methyl_3_oxo_hexa_decanoyl_ACP_c = 1.0 15_methyl_3_hydroxy_hexa_decanoyl_ACP_c + 1.0 NADP__c
rxn05404	0	1.0 H__c + 1.0 Malonyl__acyl_carrier_protein__c + 1.0 13_methyl_tetra_decanoyl_ACP_c = 1.0 CO2_c + 1.0 Acyl_carrier_protein_c + 1.0 15_methyl_3_oxo_hexa_decanoyl_ACP_c
rxn05402	0	1.0 13_methyl_3_hydroxy_tetra_decanoyl_ACP_c = 1.0 13_methyl_trans_tetra_dec_2_enoyl_ACP_c + 1.0 H2O_c
rxn05401	0	1.0 H__c + 1.0 13_methyl_3_oxo_tetra_decanoyl_ACP_c + 1.0 NADPH_c = 1.0 13_methyl_3_hydroxy_tetra_decanoyl_ACP_c + 1.0 NADP__c
rxn05400	0	1.0 H__c + 1.0 11_methyl_dodecanoyl_ACP_c + 1.0 Malonyl__acyl_carrier_protein__c = 1.0 CO2_c + 1.0 13_methyl_3_oxo_tetra_decanoyl_ACP_c + 1.0 Acyl_carrier_protein_c
rxn05398	0	1.0 11_methyl_3_hydroxy_dodecanoyl_ACP_c = 1.0 H2O_c + 1.0 11_methyl_trans_dodec_2_enoyl_ACP_c
rxn05397	0	1.0 H__c + 1.0 NADPH_c + 1.0 11_methyl_3_oxo_dodecanoyl_ACP_c = 1.0 11_methyl_3_hydroxy_dodecanoyl_ACP_c + 1.0 NADP__c
rxn05396	0	1.0 H__c + 1.0 9_methyl_decanoyl_ACP_c + 1.0 Malonyl__acyl_carrier_protein__c = 1.0 CO2_c + 1.0 11_methyl_3_oxo_dodecanoyl_ACP_c + 1.0 Acyl_carrier_protein_c
rxn05394	0	1.0 9_methyl_3_hydroxy_decanoyl_ACP_c = 1.0 9_methyl_trans_dec_2_enoyl_ACP_c + 1.0 H2O_c
rxn05393	0	1.0 9_methyl_3_oxo_decanoyl_ACP_c + 1.0 H__c + 1.0 NADPH_c = 1.0 9_methyl_3_hydroxy_decanoyl_ACP_c + 1.0 NADP__c
rxn05392	0	1.0 H__c + 1.0 7_methyl_octanoyl_ACP_c + 1.0 Malonyl__acyl_carrier_protein__c = 1.0 9_methyl_3_oxo_decanoyl_ACP_c + 1.0 CO2_c + 1.0 Acyl_carrier_protein_c
rxn05390	0	1.0 7_methyl_3_hydroxy_octanoyl_ACP_c = 1.0 7_methyl_trans_oct_2_enoyl_ACP_c + 1.0 H2O_c
rxn05389	0	1.0 7_methyl_3_oxo_octanoyl_ACP_c + 1.0 NADPH_c + 1.0 H__c = 1.0 7_methyl_3_hydroxy_octanoyl_ACP_c + 1.0 NADP__c
rxn05388	0	1.0 H__c + 1.0 5_methyl_hexanoyl_ACP_c + 1.0 Malonyl__acyl_carrier_protein__c = 1.0 CO2_c + 1.0 7_methyl_3_oxo_octanoyl_ACP_c + 1.0 Acyl_carrier_protein_c
rxn05386	0	1.0 5_methyl_3_hydroxy_hexanoyl_ACP_c = 1.0 H2O_c + 1.0 5_methyl_trans_hex_2_enoyl_ACP_c
rxn05385	0	1.0 5_methyl_3_oxo_hexanoyl_ACP_c + 1.0 NADPH_c + 1.0 H__c = 1.0 5_methyl_3_hydroxy_hexanoyl_ACP_c + 1.0 NADP__c
rxn05384	0	1.0 H__c + 1.0 Malonyl__acyl_carrier_protein__c + 1.0 3_methylbutanoyl_ACP_c = 1.0 5_methyl_3_oxo_hexanoyl_ACP_c + 1.0 CO2_c + 1.0 Acyl_carrier_protein_c
rxn05383	0	1.0 3_Methylbutanoyl_CoA_c + 1.0 Acyl_carrier_protein_c = 1.0 CoA_c + 1.0 3_methylbutanoyl_ACP_c
rxn05381	0	1.0 14_methyl_3_hydroxy_hexa_decanoyl_ACP_c = 1.0 H2O_c + 1.0 14_methyl_trans_hexa_dec_2_enoyl_ACP_c
rxn05380	0	1.0 14_methyl_3_oxo_hexa_decanoyl_ACP_c + 1.0 NADPH_c + 1.0 H__c = 1.0 14_methyl_3_hydroxy_hexa_decanoyl_ACP_c + 1.0 NADP__c
rxn05379	0	1.0 H__c + 1.0 Malonyl__acyl_carrier_protein__c + 1.0 12_methyl_tetra_decanoyl_ACP_c = 1.0 14_methyl_3_oxo_hexa_decanoyl_ACP_c + 1.0 CO2_c + 1.0 Acyl_carrier_protein_c
rxn05377	0	1.0 12_methyl_3_hydroxy_tetra_decanoyl_ACP_c = 1.0 H2O_c + 1.0 12_methyl_trans_tetra_dec_2_enoyl_ACP_c
rxn05376	0	1.0 H__c + 1.0 12_methyl_3_oxo_tetra_decanoyl_ACP_c + 1.0 NADPH_c = 1.0 12_methyl_3_hydroxy_tetra_decanoyl_ACP_c + 1.0 NADP__c
rxn05375	0	1.0 H__c + 1.0 Malonyl__acyl_carrier_protein__c + 1.0 10_methyl_dodecanoyl_ACP_c = 1.0 12_methyl_3_oxo_tetra_decanoyl_ACP_c + 1.0 CO2_c + 1.0 Acyl_carrier_protein_c
rxn05373	0	1.0 10_methyl_3_hydroxy_dodecanoyl_ACP_c = 1.0 10_methyl_trans_dodec_2_enoyl_ACP_c + 1.0 H2O_c
rxn05372	0	1.0 10_methyl_3_oxo_dodecanoyl_ACP_c + 1.0 H__c + 1.0 NADPH_c = 1.0 10_methyl_3_hydroxy_dodecanoyl_ACP_c + 1.0 NADP__c
rxn05371	0	1.0 H__c + 1.0 Malonyl__acyl_carrier_protein__c + 1.0 8_methyl_decanoyl_ACP_c = 1.0 10_methyl_3_oxo_dodecanoyl_ACP_c + 1.0 CO2_c + 1.0 Acyl_carrier_protein_c
rxn05369	0	1.0 8_methyl_3_hydroxy_decanoyl_ACP_c = 1.0 H2O_c + 1.0 8_methyl_trans_dec_2_enoyl_ACP_c
rxn05368	0	1.0 H__c + 1.0 NADPH_c + 1.0 8_methyl_3_oxo_decanoyl_ACP_c = 1.0 8_methyl_3_hydroxy_decanoyl_ACP_c + 1.0 NADP__c
rxn05367	0	1.0 H__c + 1.0 Malonyl__acyl_carrier_protein__c + 1.0 6_methyl_octanoyl_ACP_c = 1.0 CO2_c + 1.0 8_methyl_3_oxo_decanoyl_ACP_c + 1.0 Acyl_carrier_protein_c
rxn05365	0	1.0 6_methyl_3_hydroxy_octanoyl_ACP_c = 1.0 H2O_c + 1.0 6_methyl_trans_oct_2_enoyl_ACP_c
rxn05364	0	1.0 6_methyl_3_oxo_octanoyl_ACP_c + 1.0 NADPH_c + 1.0 H__c = 1.0 6_methyl_3_hydroxy_octanoyl_ACP_c + 1.0 NADP__c
rxn05363	0	1.0 H__c + 1.0 Malonyl__acyl_carrier_protein__c + 1.0 4_methyl_hexanoyl_ACP_c = 1.0 6_methyl_3_oxo_octanoyl_ACP_c + 1.0 CO2_c + 1.0 Acyl_carrier_protein_c
rxn05361	0	1.0 4_methyl_3_hydroxy_hexanoyl_ACP_c = 1.0 4_methyl_trans_hex_2_enoyl_ACP_c + 1.0 H2O_c
rxn05360	0	1.0 NADPH_c + 1.0 4_methyl_3_oxo_hexanoyl_ACP_c + 1.0 H__c = 1.0 4_methyl_3_hydroxy_hexanoyl_ACP_c + 1.0 NADP__c
rxn05359	0	1.0 H__c + 1.0 Malonyl__acyl_carrier_protein__c + 1.0 2_methylbutanoyl_ACP_c = 1.0 CO2_c + 1.0 4_methyl_3_oxo_hexanoyl_ACP_c + 1.0 Acyl_carrier_protein_c
rxn05358	0	1.0 2_Methylbutanoyl_CoA_c + 1.0 Acyl_carrier_protein_c = 1.0 CoA_c + 1.0 2_methylbutanoyl_ACP_c
rxn05319	0	1.0 H2O_c = 1.0 H2O_e
rxn05296	0	0.2097 L_Tyrosine_c + 0.2801 L_Aspartate_c + 0.3329 L_Phenylalanine_c + 0.6555 L_Leucine_c + 0.3526 L_Threonine_c + 0.1028 L_Tryptophan_c + 0.5807 L_Valine_c + 0.4091 L_Serine_c + 0.3653 L_Arginine_c + 0.1073 L_Cysteine_c + 0.2145 L_Methionine_c + 0.6114 L_Lysine_c + 0.1546 L_Histidine_c + 0.2801 L_Asparagine_c + 0.3041 L_Proline_c + 0.5051 L_Alanine_c + 0.4928 L_Glutamine_c + 0.5107 L_Isoleucine…
rxn05295	0	0.5853 CTP_c + 0.6331 UTP_c + 0.9496 GTP_c + 0.7706 ATP_c = 2.9386 Diphosphate_c + 1.0 mRNA_c
rxn05294	0	0.884 dATP_c + 0.6692 dGTP_c + 0.8807 dTTP_c + 0.6684 dCTP_c = 1.0 DNA_c + 3.1023 Diphosphate_c
rxn05293	0	1.0 2_C_Methyl_D_erythritol_2_4_cyclodiphosphate_c + 1.0 H__c + 1.0 NADH_c = 1.0 1_Hydroxy_2_methyl_2_butenyl_4_diphosphate_c + 1.0 NAD__c + 1.0 H2O_c
rxn05289	0	1.0 H__c + 1.0 trdox_c + 1.0 NADPH_c = 1.0 trdrd_c + 1.0 NADP__c
rxn05256	0	1.0 Adenylyl_sulfate_c + 1.0 trdrd_c = 1.0 Sulfite_c + 1.0 trdox_c + 1.0 AMP_c
rxn05229	0	1.0 Aminoimidazole_ribotide_c + 1.0 HCO3__c + 1.0 ATP_c = 1.0 1__5_Phospho_D_ribosyl__5_amino_4_imidazolecarboxylate_c + 1.0 H__c + 1.0 Orthophosphate_c + 1.0 ADP_c
rxn05226	0	1.0 D_Glucose_e + 1.0 Phosphoenolpyruvate_c = 1.0 Pyruvate_c + 1.0 D_Glucose_6_phosphate_c
rxn05195	0	1.0 H2O_c + 1.0 Fe3__e + 1.0 ATP_c = 1.0 H__c + 1.0 Orthophosphate_c + 1.0 Fe3__c + 1.0 ADP_c
rxn05150	0	1.0 Zinc_e + 1.0 H2O_c + 1.0 ATP_c = 1.0 H__c + 1.0 Orthophosphate_c + 1.0 ADP_c + 1.0 Zinc_c
rxn05145	0	1.0 H2O_c + 1.0 Orthophosphate_e + 1.0 ATP_c = 1.0 H__c + 2.0 Orthophosphate_c + 1.0 ADP_c
rxn05144	0	1.0 L_Glutamine_c + 1.0 D_Ribulose_5_phosphate_c + 1.0 D_Glyceraldehyde_3_phosphate_c = 2.0 H__c + 1.0 L_Glutamate_c + 1.0 Pyridoxal_phosphate_c + 1.0 Orthophosphate_c + 3.0 H2O_c
rxn05116	0	1.0 H__c + 1.0 2_Amino_3_oxo_4_phosphonooxybutyrate_c = 1.0 3_Amino_2_oxopropyl_phosphate_c + 1.0 CO2_c
rxn05064	0	2.0 H__c + 1.0 Carbamate_c = 1.0 CO2_c + 1.0 NH3_c
rxn05040	0	1.0 D_Ribulose_5_phosphate_c = 1.0 3_4_Dihydroxy_2_butanone_4_phosphate_c + 1.0 Formate_c + 1.0 H__c
rxn05039	0	1.0 H2O_c + 1.0 5_Amino_6__5__phosphoribitylamino_uracil_c = 1.0 H__c + 1.0 Orthophosphate_c + 1.0 5_Amino_6__1_D_ribitylamino_uracil_c
rxn04996	0	1.0 1_Hydroxy_2_methyl_2_butenyl_4_diphosphate_c + 1.0 H__c + 1.0 NADPH_c = 1.0 H2O_c + 1.0 NADP__c + 1.0 Dimethylallyl_diphosphate_c
rxn04794	0	1.0 CoA_c + 1.0 2_Oxobutanoate_c = 1.0 Propanoyl_CoA_c + 1.0 Formate_c
rxn04457	0	1.0 H__c + 1.0 5_Hydroxy_2_oxo_4_ureido_2_5_dihydro_1H_imidazole_5_carboxylate_c = 1.0 _R_____Allantoin_c + 1.0 CO2_c
rxn04456	0	1.0 H__c + 1.0 5_Hydroxy_2_oxo_4_ureido_2_5_dihydro_1H_imidazole_5_carboxylate_c = 1.0 _S_____Allantoin_c + 1.0 CO2_c
rxn04308	0	1.0 trans_trans_cis_Geranylgeranyl_diphosphate_c + 7.0 Isopentenyl_diphosphate_c = 7.0 Diphosphate_c + 1.0 di_trans_poly_cis_Undecaprenyl_diphosphate_c
rxn04133	0	1.0 5_Hydroxyisourate_c + 1.0 H2O_c = 1.0 _S_____Allantoin_c + 1.0 CO2_c
rxn04132	0	1.0 5_Hydroxyisourate_c + 1.0 H2O_c = 1.0 _R_____Allantoin_c + 1.0 CO2_c
rxn04113	0	1.0 1_Hydroxy_2_methyl_2_butenyl_4_diphosphate_c + 1.0 H__c + 1.0 NADPH_c = 1.0 Isopentenyl_diphosphate_c + 1.0 H2O_c + 1.0 NADP__c
rxn03958	0	1.0 2_C_Methyl_D_erythritol_4_phosphate_c + 1.0 NADP__c = 1.0 H__c + 1.0 NADPH_c + 1.0 1_Deoxy_D_xylulose_5_phosphate_c
rxn03933	0	1.0 UDP_N_acetyl_D_glucosamine_c + 1.0 MurAc_oyl_L_Ala_D_gamma_Glu_L_Lys_D_Ala_D_Ala__diphospho__undecaprenol_c = 1.0 Undecaprenyl_diphospho_N_acetylmuramoyl__N_acetylglucosamine__L__alanyl_gamma_D_glutamyl_L_lysyl_D_alanyl_D_alanine_c + 1.0 UDP_c
rxn03910	0	1.0 2_Phospho_4__cytidine_5__diphospho__2_C_methyl_D_erythritol_c = 1.0 2_C_Methyl_D_erythritol_2_4_cyclodiphosphate_c + 1.0 CMP_c
rxn03909	0	1.0 Pyruvate_c + 1.0 H__c + 1.0 D_Glyceraldehyde_3_phosphate_c = 1.0 CO2_c + 1.0 1_Deoxy_D_xylulose_5_phosphate_c
rxn03908	0	1.0 4__Cytidine_5__diphospho__2_C_methyl_D_erythritol_c + 1.0 ATP_c = 1.0 ADP_c + 1.0 2_Phospho_4__cytidine_5__diphospho__2_C_methyl_D_erythritol_c
rxn03907	0	1.0 CTP_c + 1.0 2_C_Methyl_D_erythritol_4_phosphate_c = 1.0 Diphosphate_c + 1.0 4__Cytidine_5__diphospho__2_C_methyl_D_erythritol_c
rxn03904	0	1.0 di_trans_poly_cis_Undecaprenyl_phosphate_c + 1.0 UDP_N_acetylmuramoyl_L_alanyl_D_glutamyl_6_carboxy_L_lysyl_D_alanyl__D_alanine_c = 1.0 UMP_c + 1.0 Undecaprenyl_diphospho_N_acetylmuramoyl_L_alanyl_D_glutamyl_meso__2_6_diaminopimeloyl_D_alanyl_D_alanine_c
rxn03903	0	1.0 di_trans_poly_cis_Undecaprenyl_phosphate_c + 1.0 UDPMurAc_oyl_L_Ala_D_gamma_Glu_L_Lys_D_Ala_D_Ala__c = 1.0 UMP_c + 1.0 MurAc_oyl_L_Ala_D_gamma_Glu_L_Lys_D_Ala_D_Ala__diphospho__undecaprenol_c
rxn03901	0	1.0 H2O_c + 1.0 di_trans_poly_cis_Undecaprenyl_diphosphate_c = 1.0 H__c + 1.0 Orthophosphate_c + 1.0 di_trans_poly_cis_Undecaprenyl_phosphate_c
rxn03852	0	1.0 N_Acetyl_D_glucosaminyldiphosphoundecaprenol_c + 1.0 UDP_N_acetyl_D_mannosamine_c = 1.0 UDP_c + 1.0 N_Acetyl_beta_D_mannosaminyl_1_4_N_acetyl_D__glucosaminyldiphosphoundecaprenol_c
rxn03843	0	1.0 Isopentenyl_diphosphate_c + 1.0 trans_trans_Farnesyl_diphosphate_c = 1.0 trans_trans_cis_Geranylgeranyl_diphosphate_c + 1.0 Diphosphate_c
rxn03841	0	1.0 4_Amino_4_deoxychorismate_c = 1.0 Pyruvate_c + 1.0 H__c + 1.0 4_Aminobenzoate_c
rxn03446	0	1.0 O_Phospho_4_hydroxy_L_threonine_c + 1.0 H2O_c = 1.0 H__c + 1.0 Orthophosphate_c + 1.0 4_Hydroxy_L_threonine_c
rxn03437	0	1.0 2_3_Dihydroxy_3_methylpentanoate_c = 1.0 H2O_c + 1.0 _S__3_Methyl_2_oxopentanoic_acid_c
rxn03436	0	1.0 2_Aceto_2_hydroxybutanoate_c = 1.0 _R__3_Hydroxy_3_methyl_2_oxopentanoate_c
rxn03435	0	1.0 2_3_Dihydroxy_3_methylpentanoate_c + 1.0 NADP__c = 1.0 _R__3_Hydroxy_3_methyl_2_oxopentanoate_c + 1.0 NADPH_c + 1.0 H__c
rxn03421	0	1.0 2_5_Diaminopyrimidine_nucleoside_triphosphate_c = 1.0 2_5_Diamino_6__5__triphosphoryl_3__4__trihydroxy_2__oxopentyl___amino_4_oxopyrimidine_c
rxn03419	0	1.0 H2O_c + 1.0 Formamidopyrimidine_nucleoside_triphosphate_c = 1.0 H__c + 1.0 Formate_c + 1.0 2_5_Diaminopyrimidine_nucleoside_triphosphate_c
rxn03409	0	1.0 Undecaprenyl_diphospho_N_acetylmuramoyl__N_acetylglucosamine__L__alanyl_D_glutamyl_meso_2_6_diaminopimeloyl_D_alanyl_D_alanine_c + 1.0 ATP_c + 1.0 NH3_c = 1.0 H__c + 1.0 Orthophosphate_c + 1.0 Undecaprenyl_diphospho_N_acetylmuramoyl__N_acetylglucosamine__L__alanyl_D_glutaminyl_meso_2_6_diaminopimeloyl_D_alanyl_D_alanine_c + 1.0 ADP_c
rxn03408	0	1.0 Undecaprenyl_diphospho_N_acetylmuramoyl_L_alanyl_D_glutamyl_meso__2_6_diaminopimeloyl_D_alanyl_D_alanine_c + 1.0 UDP_N_acetyl_D_glucosamine_c = 1.0 Undecaprenyl_diphospho_N_acetylmuramoyl__N_acetylglucosamine__L__alanyl_D_glutamyl_meso_2_6_diaminopimeloyl_D_alanyl_D_alanine_c + 1.0 UDP_c
rxn03407	0	1.0 Undecaprenyl_diphospho_N_acetylmuramoyl__N_acetylglucosamine__L__alanyl_gamma_D_glutamyl_L_lysyl_D_alanyl_D_alanine_c + 1.0 ATP_c + 1.0 NH3_c = 1.0 Undecaprenyl_diphospho_N_acetylmuramoyl__N_acetylglucosamine__L__alanyl_D_isoglutaminyl_L_lysyl_D_alanyl_D_alanine_c + 1.0 Orthophosphate_c + 1.0 ADP_c + 1.0 H__c
rxn03406	0	1.0 Undecaprenyl_diphospho_N_acetylmuramoyl__N_acetylglucosamine__L__alanyl_D_glutamyl_L_lysyl_D_alanyl_D_alanine_c + 1.0 ATP_c + 1.0 NH3_c = 1.0 H__c + 1.0 Orthophosphate_c + 1.0 Undecaprenyl_diphospho_N_acetylmuramoyl__N_acetylglucosamine__L__alanyl_D_glutaminyl_L_lysyl_D_alanyl_D_alanine_c + 1.0 ADP_c
rxn03194	0	1.0 2_Oxobutanoate_c + 1.0 2__alpha_Hydroxyethyl_thiamine_diphosphate_c = 1.0 Thiamin_diphosphate_c + 1.0 2_Aceto_2_hydroxybutanoate_c
rxn03175	0	1.0 5__5_Phospho_D_ribosylaminoformimino__1__5_phosphoribosyl___imidazole_4_carboxamide_c = 1.0 N__5__Phospho_D_1__ribulosylformimino__5_amino_1__5___phospho_D__ribosyl__4_imidazolecarboxamide_c
rxn03174	0	1.0 2_5_Diamino_6__5__triphosphoryl_3__4__trihydroxy_2__oxopentyl___amino_4_oxopyrimidine_c = 1.0 2_Amino_4_hydroxy_6__erythro_1_2_3_trihydroxypropyl_dihydropteridine_triphosphate_c + 1.0 H2O_c
rxn03167	0	1.0 2_Amino_4_hydroxy_6__erythro_1_2_3_trihydroxypropyl_dihydropteridine_triphosphate_c + 3.0 H2O_c = 1.0 2_Amino_4_hydroxy_6__D_erythro_1_2_3_trihydroxypropyl__7_8__dihydropteridine_c + 3.0 H__c + 3.0 Orthophosphate_c
rxn03164	0	1.0 D_Alanyl_D_alanine_c + 1.0 UDP_N_acetylmuramoyl_L_alanyl_D_gamma_glutamyl_meso_2_6__diaminopimelate_c + 1.0 ATP_c = 1.0 H__c + 1.0 Orthophosphate_c + 1.0 UDP_N_acetylmuramoyl_L_alanyl_D_glutamyl_6_carboxy_L_lysyl_D_alanyl__D_alanine_c + 1.0 ADP_c
rxn03147	0	1.0 1__5_Phospho_D_ribosyl__5_amino_4_imidazolecarboxylate_c + 1.0 L_Aspartate_c + 1.0 ATP_c = 1.0 1__5_Phosphoribosyl__4__N_succinocarboxamide__5_aminoimidazole_c + 2.0 H__c + 1.0 Orthophosphate_c + 1.0 ADP_c
rxn03137	0	1.0 10_Formyltetrahydrofolate_c + 1.0 1__5__Phosphoribosyl__5_amino_4_imidazolecarboxamide_c = 1.0 1__5__Phosphoribosyl__5_formamido_4_imidazolecarboxamide_c + 1.0 Tetrahydrofolate_c
rxn03136	0	1.0 1__5_Phosphoribosyl__4__N_succinocarboxamide__5_aminoimidazole_c = 1.0 Fumarate_c + 1.0 1__5__Phosphoribosyl__5_amino_4_imidazolecarboxamide_c
rxn03135	0	1.0 L_Glutamine_c + 1.0 N__5__Phospho_D_1__ribulosylformimino__5_amino_1__5___phospho_D__ribosyl__4_imidazolecarboxamide_c = 1.0 D_erythro_1__Imidazol_4_yl_glycerol_3_phosphate_c + 1.0 H__c + 1.0 L_Glutamate_c + 1.0 1__5__Phosphoribosyl__5_amino_4_imidazolecarboxamide_c
rxn03087	0	1.0 2_Oxoglutarate_c + 1.0 N_Succinyl_LL_2_6_diaminoheptanedioate_c = 1.0 N_Succinyl_2_L_amino_6_oxoheptanedioate_c + 1.0 L_Glutamate_c
rxn03084	0	1.0 5__Phosphoribosyl_N_formylglycinamide_c + 1.0 L_Glutamine_c + 1.0 H2O_c + 1.0 ATP_c = 1.0 H__c + 1.0 Orthophosphate_c + 1.0 2__Formamido__N1__5__phosphoribosyl_acetamidine_c + 1.0 L_Glutamate_c + 1.0 ADP_c
rxn03080	0	1.0 3_4_Dihydroxy_2_butanone_4_phosphate_c + 1.0 5_Amino_6__1_D_ribitylamino_uracil_c = 1.0 Orthophosphate_c + 1.0 H__c + 1.0 6_7_Dimethyl_8__1_D_ribityl_lumazine_c + 2.0 H2O_c
rxn03068	0	1.0 2_3_Dihydroxy_3_methylbutanoate_c + 1.0 NADP__c = 1.0 H__c + 1.0 3_Hydroxy_3_methyl_2_oxobutanoic_acid_c + 1.0 NADPH_c
rxn03031	0	1.0 Succinyl_CoA_c + 1.0 H2O_c + 1.0 2_3_4_5_Tetrahydrodipicolinate_c = 1.0 N_Succinyl_2_L_amino_6_oxoheptanedioate_c + 1.0 CoA_c
rxn03012	0	1.0 L_2_Amino_6_oxoheptanedioate_c = 1.0 H__c + 1.0 H2O_c + 1.0 2_3_4_5_Tetrahydrodipicolinate_c
rxn02988	0	1.0 Glycerone_phosphate_c + 1.0 Iminoaspartate_c = 1.0 H__c + 2.0 H2O_c + 1.0 Pyridine_2_3_dicarboxylate_c + 1.0 Orthophosphate_c
rxn02938	0	1.0 1__5_Phospho_D_ribosyl__5_amino_4_imidazolecarboxylate_c + 1.0 H__c = 1.0 Aminoimidazole_ribotide_c + 1.0 CO2_c
rxn02937	0	1.0 2__Formamido__N1__5__phosphoribosyl_acetamidine_c + 1.0 ATP_c = 1.0 H__c + 1.0 Orthophosphate_c + 1.0 Aminoimidazole_ribotide_c + 1.0 ADP_c
rxn02929	0	1.0 2_3_4_5_Tetrahydrodipicolinate_c + 1.0 NADP__c = 1.0 H__c + 1.0 NADPH_c + 1.0 L_2_3_Dihydrodipicolinate_c
rxn02916	0	1.0 6_Amino_2_oxohexanoate_c = 1.0 H__c + 1.0 H2O_c + 1.0 delta1_Piperideine_2_carboxylate_c
rxn02895	0	1.0 5_Phosphoribosylamine_c + 1.0 Glycine_c + 1.0 ATP_c = 1.0 H__c + 1.0 Orthophosphate_c + 1.0 5__Phosphoribosylglycinamide_c + 1.0 ADP_c
rxn02835	0	1.0 H2O_c + 1.0 Phosphoribosyl_AMP_c = 1.0 5__5_Phospho_D_ribosylaminoformimino__1__5_phosphoribosyl___imidazole_4_carboxamide_c
rxn02834	0	1.0 H2O_c + 1.0 1__5_Phospho_D_ribosyl__ATP_c = 1.0 Diphosphate_c + 1.0 Phosphoribosyl_AMP_c
rxn02666	0	1.0 L_2_Amino_3_oxobutanoic_acid_c + 1.0 H__c = 1.0 CO2_c + 1.0 Aminoacetone_c
rxn02508	0	1.0 N__5_Phospho_D_ribosyl_anthranilate_c = 1.0 1__2_Carboxyphenylamino__1__deoxy_D_ribulose_5__phosphate_c
rxn02507	0	1.0 H__c + 1.0 1__2_Carboxyphenylamino__1__deoxy_D_ribulose_5__phosphate_c = 1.0 Indoleglycerol_phosphate_c + 1.0 H2O_c + 1.0 CO2_c
rxn02504	0	1.0 2_Amino_4_hydroxy_6__D_erythro_1_2_3_trihydroxypropyl__7_8__dihydropteridine_c = 1.0 Glycolaldehyde_c + 1.0 2_Amino_4_hydroxy_6_hydroxymethyl_7_8_dihydropteridine_c
rxn02503	0	1.0 2_Amino_4_hydroxy_6_hydroxymethyl_7_8_dihydropteridine_c + 1.0 ATP_c = 1.0 AMP_c + 1.0 2_Amino_7_8_dihydro_4_hydroxy_6__diphosphooxymethyl_pteridine_c
rxn02476	0	1.0 Shikimate_3_phosphate_c + 1.0 Phosphoenolpyruvate_c = 1.0 H__c + 1.0 Orthophosphate_c + 1.0 5_O__1_Carboxyvinyl__3_phosphoshikimate_c
rxn02475	0	1.0 H__c + 1.0 H2O_c + 1.0 2_5_Diamino_6__5__phosphoribosylamino__4_pyrimidineone_c = 1.0 5_Amino_6__5__phosphoribosylamino_uracil_c + 1.0 NH3_c
rxn02474	0	1.0 5_Amino_6__5__phosphoribitylamino_uracil_c + 1.0 NADP__c = 1.0 NADPH_c + 1.0 5_Amino_6__5__phosphoribosylamino_uracil_c + 1.0 H__c
rxn02473	0	1.0 D_erythro_1__Imidazol_4_yl_glycerol_3_phosphate_c = 1.0 3__Imidazol_4_yl__2_oxopropyl_phosphate_c + 1.0 H2O_c
rxn02465	0	1.0 NADPH_c + 1.0 N_Acetyl_L_glutamate_5_phosphate_c = 1.0 Orthophosphate_c + 1.0 N_Acetyl_L_glutamate_5_semialdehyde_c + 1.0 NADP__c
rxn02402	0	2.0 H__c + 1.0 Pyridine_2_3_dicarboxylate_c + 1.0 5_Phospho_alpha_D_ribose_1_diphosphate_c = 1.0 Diphosphate_c + 1.0 CO2_c + 1.0 Nicotinate_D_ribonucleotide_c
rxn02380	0	1.0 beta_D_Glucose_6_phosphate_c = 1.0 D_Fructose_6_phosphate_c
rxn02376	0	1.0 3_Carboxy_1_hydroxypropyl_ThPP_c + 1.0 Lipoamide_c = 1.0 Thiamin_diphosphate_c + 1.0 S_Succinyldihydrolipoamide_c
rxn02374	0	1.0 L_Glutamate_5_semialdehyde_c = 1.0 _S__1_Pyrroline_5_carboxylate_c + 1.0 H__c + 1.0 H2O_c
rxn02373	0	1.0 L_Glutamyl_5_phosphate_c + 1.0 NADPH_c = 1.0 Orthophosphate_c + 1.0 L_Glutamate_5_semialdehyde_c + 1.0 NADP__c
rxn02341	0	1.0 _R__4__Phosphopantothenoyl_L_cysteine_c + 1.0 H__c = 1.0 CO2_c + 1.0 Pantetheine_4__phosphate_c
rxn02320	0	1.0 2_Oxoglutarate_c + 1.0 L_Histidinol_phosphate_c = 1.0 3__Imidazol_4_yl__2_oxopropyl_phosphate_c + 1.0 L_Glutamate_c
rxn02304	0	3.0 Oxygen_c + 2.0 Protoporphyrinogen_IX_c = 6.0 H2O_c + 2.0 Protoporphyrin_c
rxn02303	0	2.0 H__c + 1.0 Oxygen_c + 1.0 Coproporphyrinogen_III_c = 2.0 H2O_c + 2.0 CO2_c + 1.0 Protoporphyrinogen_IX_c
rxn02302	0	1.0 O_Acetyl_L_homoserine_c + 1.0 L_Cysteine_c = 1.0 H__c + 1.0 Acetate_c + 1.0 Cystathionine_c
rxn02288	0	4.0 H__c + 1.0 Uroporphyrinogen_III_c = 1.0 Coproporphyrinogen_III_c + 4.0 CO2_c
rxn02286	0	1.0 L_Alanine_c + 1.0 ATP_c + 1.0 UDP_N_acetylmuramate_c = 1.0 UDP_N_acetylmuramoyl_L_alanine_c + 1.0 Orthophosphate_c + 1.0 ADP_c + 1.0 H__c
rxn02285	0	1.0 H__c + 1.0 UDP_N_acetyl_3__1_carboxyvinyl__D_glucosamine_c + 1.0 NADPH_c = 1.0 UDP_N_acetylmuramate_c + 1.0 NADP__c
rxn02264	0	1.0 Hydroxymethylbilane_c = 1.0 H2O_c + 1.0 Uroporphyrinogen_III_c
rxn02213	0	1.0 3_Dehydroquinate_c = 1.0 H2O_c + 1.0 3_Dehydroshikimate_c
rxn02212	0	1.0 2_Dehydro_3_deoxy_D_arabino_heptonate_7_phosphate_c = 1.0 H__c + 1.0 Orthophosphate_c + 1.0 3_Dehydroquinate_c
rxn02201	0	1.0 2_Amino_7_8_dihydro_4_hydroxy_6__diphosphooxymethyl_pteridine_c + 1.0 4_Aminobenzoate_c = 1.0 Diphosphate_c + 1.0 Dihydropteroate_c
rxn02200	0	1.0 2_Amino_4_hydroxy_6_hydroxymethyl_7_8_dihydropteridine_c + 1.0 4_Aminobenzoate_c = 1.0 H2O_c + 1.0 Dihydropteroate_c
rxn02187	0	1.0 2_Acetolactate_c = 1.0 3_Hydroxy_3_methyl_2_oxobutanoic_acid_c
rxn02186	0	1.0 H__c + 1.0 NADPH_c + 1.0 2_Acetolactate_c = 1.0 2_3_Dihydroxy_3_methylbutanoate_c + 1.0 NADP__c
rxn02185	0	1.0 Thiamin_diphosphate_c + 1.0 2_Acetolactate_c = 1.0 Pyruvate_c + 1.0 2__alpha_Hydroxyethyl_thiamine_diphosphate_c
rxn02175	0	1.0 Pantetheine_4__phosphate_c + 1.0 ATP_c = 1.0 Diphosphate_c + 1.0 Dephospho_CoA_c
rxn02160	0	1.0 H2O_c + 1.0 L_Histidinol_phosphate_c = 1.0 L_Histidinol_c + 1.0 H__c + 1.0 Orthophosphate_c
rxn02159	0	1.0 NAD__c + 1.0 L_Histidinol_c = 1.0 H__c + 1.0 NADH_c + 1.0 L_Histidinal_c
rxn02155	0	1.0 Nicotinate_D_ribonucleotide_c + 1.0 ATP_c = 1.0 Deamino_NAD__c + 1.0 Diphosphate_c
rxn02011	0	1.0 meso_2_6_Diaminoheptanedioate_c + 1.0 UDP_N_acetylmuramoyl_L_alanyl_D_glutamate_c + 1.0 ATP_c = 1.0 H__c + 1.0 Orthophosphate_c + 1.0 UDP_N_acetylmuramoyl_L_alanyl_D_gamma_glutamyl_meso_2_6__diaminopimelate_c + 1.0 ADP_c
rxn02008	0	1.0 UDP_N_acetylmuramoyl_L_alanine_c + 1.0 D_Glutamate_c + 1.0 ATP_c = 1.0 H__c + 1.0 Orthophosphate_c + 1.0 UDP_N_acetylmuramoyl_L_alanyl_D_glutamate_c + 1.0 ADP_c
rxn01977	0	1.0 D_Glucose_6_phosphate_c = 1.0 beta_D_Glucose_6_phosphate_c
rxn01975	0	1.0 beta_D_Glucose_6_phosphate_c + 1.0 NADP__c = 1.0 D_Glucono_1_5_lactone_6_phosphate_c + 1.0 H__c + 1.0 NADPH_c
rxn01974	0	1.0 LL_2_6_Diaminoheptanedioate_c = 1.0 meso_2_6_Diaminoheptanedioate_c
rxn01973	0	1.0 H2O_c + 1.0 N_Succinyl_LL_2_6_diaminoheptanedioate_c = 1.0 Succinate_c + 1.0 LL_2_6_Diaminoheptanedioate_c
rxn01964	0	1.0 Indoleglycerol_phosphate_c + 1.0 L_Serine_c = 1.0 L_Tryptophan_c + 1.0 H2O_c + 1.0 D_Glyceraldehyde_3_phosphate_c
rxn01917	0	1.0 N_Acetyl_L_glutamate_c + 1.0 ATP_c + 1.0 H__c = 1.0 N_Acetyl_L_glutamate_5_phosphate_c + 1.0 ADP_c
rxn01872	0	1.0 Succinyl_CoA_c + 1.0 Dihydrolipoamide_c = 1.0 S_Succinyldihydrolipoamide_c + 1.0 CoA_c
rxn01791	0	1.0 _R__Pantoate_c + 1.0 ATP_c + 1.0 beta_Alanine_c = 1.0 Diphosphate_c + 1.0 AMP_c + 1.0 Pantothenate_c
rxn01790	0	1.0 _R__Pantoate_c + 1.0 NADP__c = 1.0 2_Dehydropantoate_c + 1.0 NADPH_c + 1.0 H__c
rxn01740	0	1.0 Shikimate_c + 1.0 NADP__c = 1.0 H__c + 1.0 NADPH_c + 1.0 3_Dehydroshikimate_c
rxn01739	0	1.0 Shikimate_c + 1.0 ATP_c = 1.0 Shikimate_3_phosphate_c + 1.0 ADP_c
rxn01682	0	1.0 Indoleglycerol_phosphate_c = 1.0 D_Glyceraldehyde_3_phosphate_c + 1.0 Indole_c
rxn01664	0	1.0 L_2_Aminoadipate_6_semialdehyde_c = 1.0 H__c + 1.0 H2O_c + 1.0 2_3_4_5_Tetrahydropyridine_2_carboxylate_c
rxn01653	0	1.0 5_Formyltetrahydrofolate_c + 1.0 ATP_c = 1.0 5_10_Methenyltetrahydrofolate_c + 1.0 Orthophosphate_c + 1.0 ADP_c
rxn01644	0	1.0 Pyruvate_c + 1.0 L_Aspartate_4_semialdehyde_c = 1.0 H__c + 2.0 H2O_c + 1.0 L_2_3_Dihydrodipicolinate_c
rxn01643	0	1.0 4_Phospho_L_aspartate_c + 1.0 NADPH_c = 1.0 Orthophosphate_c + 1.0 L_Aspartate_4_semialdehyde_c + 1.0 NADP__c
rxn01637	0	1.0 2_Oxoglutarate_c + 1.0 N_Acetylornithine_c = 1.0 L_Glutamate_c + 1.0 N_Acetyl_L_glutamate_5_semialdehyde_c
rxn01629	0	1.0 5_Aminolevulinate_c = 1.0 _S__4_Amino_5_oxopentanoate_c
rxn01603	0	1.0 L_Glutamate_c + 1.0 ATP_c + 1.0 Dihydropteroate_c = 1.0 H__c + 1.0 Orthophosphate_c + 1.0 Dihydrofolate_c + 1.0 ADP_c
rxn01575	0	1.0 2_Oxoglutarate_c + 1.0 L_Isoleucine_c = 1.0 L_Glutamate_c + 1.0 _S__3_Methyl_2_oxopentanoic_acid_c
rxn01520	0	1.0 5_10_Methylenetetrahydrofolate_c + 1.0 dUMP_c = 1.0 dTMP_c + 1.0 Dihydrofolate_c
rxn01519	0	1.0 H2O_c + 1.0 dUTP_c = 1.0 Diphosphate_c + 1.0 dUMP_c
rxn01513	0	1.0 dTMP_c + 1.0 ATP_c = 1.0 dTDP_c + 1.0 ADP_c
rxn01509	0	1.0 dGMP_c + 1.0 ATP_c = 1.0 dGDP_c + 1.0 ADP_c
rxn01486	0	1.0 Isopentenyl_diphosphate_c + 1.0 trans_trans_Farnesyl_diphosphate_c = 1.0 Diphosphate_c + 1.0 Geranylgeranyl_diphosphate_c
rxn01485	0	1.0 alpha_D_Glucosamine_1_phosphate_c = 1.0 D_Glucosamine_6_phosphate_c
rxn01476	0	1.0 D_Glucono_1_5_lactone_6_phosphate_c + 1.0 H2O_c = 1.0 H__c + 1.0 6_Phospho_D_gluconate_c
rxn01466	0	1.0 Isopentenyl_diphosphate_c + 1.0 Geranyl_diphosphate_c = 1.0 Diphosphate_c + 1.0 trans_trans_Farnesyl_diphosphate_c
rxn01465	0	1.0 H2O_c + 1.0 _S__Dihydroorotate_c = 1.0 H__c + 1.0 N_Carbamoyl_L_aspartate_c
rxn01434	0	1.0 L_Citrulline_c + 1.0 L_Aspartate_c + 1.0 ATP_c = 1.0 Diphosphate_c + 1.0 AMP_c + 1.0 N__L_Arginino_succinate_c
rxn01387	0	1.0 Isocitrate_c + 1.0 NADP__c = 1.0 Oxalosuccinate_c + 1.0 H__c + 1.0 NADPH_c
rxn01362	0	1.0 5_Phospho_alpha_D_ribose_1_diphosphate_c + 1.0 Orotate_c = 1.0 Diphosphate_c + 1.0 Orotidine_5__phosphate_c
rxn01360	0	1.0 _S__Dihydroorotate_c + 1.0 Oxygen_c = 1.0 H2O2_c + 1.0 Orotate_c
rxn01334	0	1.0 Sedoheptulose_1_7_bisphosphate_c = 1.0 Glycerone_phosphate_c + 1.0 D_Erythrose_4_phosphate_c
rxn01333	0	1.0 Sedoheptulose_7_phosphate_c + 1.0 D_Glyceraldehyde_3_phosphate_c = 1.0 D_Fructose_6_phosphate_c + 1.0 D_Erythrose_4_phosphate_c
rxn01332	0	1.0 H2O_c + 1.0 Phosphoenolpyruvate_c + 1.0 D_Erythrose_4_phosphate_c = 1.0 H__c + 1.0 Orthophosphate_c + 1.0 2_Dehydro_3_deoxy_D_arabino_heptonate_7_phosphate_c
rxn01331	0	1.0 NAD__c + 1.0 H2O_c + 1.0 D_Erythrose_4_phosphate_c = 2.0 H__c + 1.0 4_Phospho_D_erythronate_c + 1.0 NADH_c
rxn01303	0	1.0 Acetyl_CoA_c + 1.0 L_Homoserine_c = 1.0 O_Acetyl_L_homoserine_c + 1.0 CoA_c
rxn01302	0	1.0 L_Homoserine_c + 1.0 NADP__c = 1.0 H__c + 1.0 NADPH_c + 1.0 L_Aspartate_4_semialdehyde_c
rxn01301	0	1.0 NAD__c + 1.0 L_Homoserine_c = 1.0 H__c + 1.0 NADH_c + 1.0 L_Aspartate_4_semialdehyde_c
rxn01300	0	1.0 L_Homoserine_c + 1.0 ATP_c = 1.0 O_Phospho_L_homoserine_c + 1.0 ADP_c
rxn01270	0	1.0 L_Arogenate_c + 1.0 Oxaloacetate_c = 1.0 Prephenate_c + 1.0 L_Aspartate_c
rxn01265	0	1.0 Diphosphate_c + 1.0 Nicotinate_D_ribonucleotide_c = 1.0 Nicotinate_c + 1.0 H__c + 1.0 5_Phospho_alpha_D_ribose_1_diphosphate_c
rxn01257	0	1.0 L_Glutamine_c + 1.0 Chorismate_c = 1.0 L_Glutamate_c + 1.0 4_Amino_4_deoxychorismate_c
rxn01256	0	1.0 Chorismate_c = 1.0 Prephenate_c
rxn01255	0	1.0 5_O__1_Carboxyvinyl__3_phosphoshikimate_c = 1.0 H__c + 1.0 Orthophosphate_c + 1.0 Chorismate_c
rxn01241	0	1.0 NAD__c + 1.0 Dihydrolipoamide_c = 1.0 H__c + 1.0 NADH_c + 1.0 Lipoamide_c
rxn01213	0	1.0 Isopentenyl_diphosphate_c + 1.0 Dimethylallyl_diphosphate_c = 1.0 Diphosphate_c + 1.0 Geranyl_diphosphate_c
rxn01211	0	1.0 5_10_Methenyltetrahydrofolate_c + 1.0 H2O_c = 1.0 10_Formyltetrahydrofolate_c + 1.0 H__c
rxn01210	0	1.0 10_Formyltetrahydrofolate_c + 1.0 L_Glutamate_c + 1.0 ATP_c = 1.0 H__c + 1.0 Orthophosphate_c + 1.0 ADP_c + 1.0 10_Formyltetrahydrofolyl_L_glutamate_c
rxn01208	0	1.0 H__c + 1.0 _2S__2_Isopropyl_3_oxosuccinate_c = 1.0 4_Methyl_2_oxopentanoate_c + 1.0 CO2_c
rxn01200	0	1.0 Sedoheptulose_7_phosphate_c + 1.0 D_Glyceraldehyde_3_phosphate_c = 1.0 D_Xylulose_5_phosphate_c + 1.0 D_Ribose_5_phosphate_c
rxn01116	0	1.0 D_Ribulose_5_phosphate_c = 1.0 D_Xylulose_5_phosphate_c
rxn01115	0	1.0 6_Phospho_D_gluconate_c + 1.0 NADP__c = 1.0 D_Ribulose_5_phosphate_c + 1.0 CO2_c + 1.0 NADPH_c
rxn01106	0	1.0 2_Phospho_D_glycerate_c = 1.0 3_Phospho_D_glycerate_c
rxn01101	0	1.0 NAD__c + 1.0 3_Phospho_D_glycerate_c = 1.0 H__c + 1.0 3_Phosphonooxypyruvate_c + 1.0 NADH_c
rxn01100	0	1.0 H__c + 1.0 ATP_c + 1.0 3_Phospho_D_glycerate_c = 1.0 3_Phospho_D_glyceroyl_phosphate_c + 1.0 ADP_c
rxn01069	0	1.0 H2O_c + 1.0 O_Phospho_L_homoserine_c = 1.0 L_Threonine_c + 1.0 H__c + 1.0 Orthophosphate_c
rxn01019	0	1.0 L_Ornithine_c + 1.0 Carbamoyl_phosphate_c = 1.0 L_Citrulline_c + 2.0 H__c + 1.0 Orthophosphate_c
rxn01018	0	1.0 L_Aspartate_c + 1.0 Carbamoyl_phosphate_c = 2.0 H__c + 1.0 Orthophosphate_c + 1.0 N_Carbamoyl_L_aspartate_c
rxn01000	0	1.0 Prephenate_c + 1.0 H__c = 1.0 H2O_c + 1.0 CO2_c + 1.0 Phenylpyruvate_c
rxn00979	0	1.0 Glycolaldehyde_c + 1.0 NAD__c + 1.0 H2O_c = 1.0 Glycolate_c + 1.0 NADH_c + 2.0 H__c
rxn00953	0	1.0 L_Homocysteine_c + 1.0 L_Serine_c = 1.0 H2O_c + 1.0 Cystathionine_c
rxn00952	0	1.0 O_Acetyl_L_homoserine_c + 1.0 Hydrogen_sulfide_c = 1.0 H__c + 1.0 Acetate_c + 1.0 L_Homocysteine_c
rxn00931	0	1.0 L_Proline_c + 1.0 NADP__c = 1.0 _S__1_Pyrroline_5_carboxylate_c + 1.0 H__c + 1.0 NADPH_c
rxn00929	0	1.0 NAD__c + 1.0 L_Proline_c = 1.0 _S__1_Pyrroline_5_carboxylate_c + 1.0 H__c + 1.0 NADH_c
rxn00917	0	1.0 L_Glutamine_c + 1.0 H2O_c + 1.0 Xanthosine_5__phosphate_c + 1.0 ATP_c = 1.0 H__c + 1.0 L_Glutamate_c + 1.0 GMP_c + 1.0 Diphosphate_c + 1.0 AMP_c
rxn00912	0	1.0 3_Methyl_2_oxobutanoic_acid_c + 1.0 H2O_c + 1.0 5_10_Methylenetetrahydrofolate_c = 1.0 2_Dehydropantoate_c + 1.0 Tetrahydrofolate_c
rxn00907	0	1.0 5_10_Methylenetetrahydrofolate_c + 1.0 NADP__c = 1.0 5_10_Methenyltetrahydrofolate_c + 1.0 NADPH_c
rxn00903	0	1.0 L_Valine_c + 1.0 2_Oxoglutarate_c = 1.0 3_Methyl_2_oxobutanoic_acid_c + 1.0 L_Glutamate_c
rxn00898	0	1.0 2_3_Dihydroxy_3_methylbutanoate_c = 1.0 3_Methyl_2_oxobutanoic_acid_c + 1.0 H2O_c
rxn00863	0	1.0 NAD__c + 1.0 H2O_c + 1.0 L_Histidinal_c = 1.0 L_Histidine_c + 1.0 NADH_c + 2.0 H__c
rxn00851	0	2.0 D_Alanine_c + 1.0 ATP_c = 1.0 H__c + 1.0 Orthophosphate_c + 1.0 D_Alanyl_D_alanine_c + 1.0 ADP_c
rxn00838	0	1.0 L_Aspartate_c + 1.0 GTP_c + 1.0 IMP_c = 1.0 N6__1_2_Dicarboxyethyl__AMP_c + 1.0 Orthophosphate_c + 1.0 GDP_c + 2.0 H__c
rxn00834	0	1.0 NAD__c + 1.0 H2O_c + 1.0 IMP_c = 1.0 H__c + 1.0 Xanthosine_5__phosphate_c + 1.0 NADH_c
rxn00832	0	1.0 H2O_c + 1.0 IMP_c = 1.0 1__5__Phosphoribosyl__5_formamido_4_imidazolecarboxamide_c
rxn00806	0	1.0 L_Leucine_c + 1.0 2_Oxoglutarate_c = 1.0 L_Glutamate_c + 1.0 4_Methyl_2_oxopentanoate_c
rxn00802	0	1.0 N__L_Arginino_succinate_c = 1.0 Fumarate_c + 1.0 L_Arginine_c
rxn00800	0	1.0 N6__1_2_Dicarboxyethyl__AMP_c = 1.0 Fumarate_c + 1.0 AMP_c
rxn00791	0	1.0 5_Phospho_alpha_D_ribose_1_diphosphate_c + 1.0 Anthranilate_c = 1.0 Diphosphate_c + 1.0 N__5_Phospho_D_ribosyl_anthranilate_c
rxn00790	0	1.0 L_Glutamine_c + 1.0 H2O_c + 1.0 5_Phospho_alpha_D_ribose_1_diphosphate_c = 1.0 Diphosphate_c + 1.0 L_Glutamate_c + 1.0 5_Phosphoribosylamine_c
rxn00789	0	1.0 5_Phospho_alpha_D_ribose_1_diphosphate_c + 1.0 ATP_c = 1.0 Diphosphate_c + 1.0 1__5_Phospho_D_ribosyl__ATP_c
rxn00786	0	1.0 D_Fructose_1_6_bisphosphate_c = 1.0 Glycerone_phosphate_c + 1.0 D_Glyceraldehyde_3_phosphate_c
rxn00785	0	1.0 D_Glyceraldehyde_3_phosphate_c + 1.0 D_Fructose_6_phosphate_c = 1.0 D_Xylulose_5_phosphate_c + 1.0 D_Erythrose_4_phosphate_c
rxn00781	0	1.0 3_Phospho_D_glyceroyl_phosphate_c + 1.0 NADH_c = 1.0 NAD__c + 1.0 Orthophosphate_c + 1.0 D_Glyceraldehyde_3_phosphate_c
rxn00776	0	1.0 Uracil_c + 1.0 D_Ribose_5_phosphate_c = 1.0 Pseudouridine_5__phosphate_c + 1.0 H2O_c
rxn00770	0	1.0 D_Ribose_5_phosphate_c + 1.0 ATP_c = 1.0 5_Phospho_alpha_D_ribose_1_diphosphate_c + 1.0 AMP_c
rxn00747	0	1.0 D_Glyceraldehyde_3_phosphate_c = 1.0 Glycerone_phosphate_c
rxn00726	0	1.0 Chorismate_c + 1.0 NH3_c = 1.0 Pyruvate_c + 1.0 H__c + 1.0 H2O_c + 1.0 Anthranilate_c
rxn00710	0	1.0 H__c + 1.0 Orotidine_5__phosphate_c = 1.0 UMP_c + 1.0 CO2_c
rxn00704	0	1.0 D_Glucose_1_phosphate_c = 1.0 D_Glucose_6_phosphate_c
rxn00693	0	1.0 5_Methyltetrahydrofolate_c + 1.0 L_Homocysteine_c = 1.0 L_Methionine_c + 1.0 Tetrahydrofolate_c
rxn00689	0	1.0 L_Glutamate_c + 1.0 ATP_c + 1.0 Tetrahydrofolate_c = 1.0 H__c + 1.0 Orthophosphate_c + 1.0 Tetrahydrofolyl__Glu__2__c + 1.0 ADP_c
rxn00686	0	1.0 NADP__c + 1.0 Tetrahydrofolate_c = 1.0 H__c + 1.0 NADPH_c + 1.0 Dihydrofolate_c
rxn00650	0	1.0 H2O_c + 1.0 Cys_Gly_c = 1.0 L_Cysteine_c + 1.0 Glycine_c
rxn00621	0	1.0 CTP_c + 1.0 sn_Glycerol_3_phosphate_c = 1.0 Diphosphate_c + 1.0 CDP_glycerol_c
rxn00574	0	2.0 H__c + 1.0 Nitrate_c = 1.0 H2O_c + 1.0 Nitrite_c
rxn00558	0	1.0 D_Glucose_6_phosphate_c = 1.0 D_Fructose_6_phosphate_c
rxn00555	0	1.0 L_Glutamine_c + 1.0 D_Fructose_6_phosphate_c = 1.0 L_Glutamate_c + 1.0 D_Glucosamine_6_phosphate_c
rxn00545	0	1.0 D_Fructose_6_phosphate_c + 1.0 ATP_c = 1.0 D_Fructose_1_6_bisphosphate_c + 1.0 ADP_c
rxn00527	0	1.0 L_Tyrosine_c + 1.0 2_Oxoglutarate_c = 1.0 3__4_Hydroxyphenyl_pyruvate_c + 1.0 L_Glutamate_c
rxn00526	0	1.0 L_Arogenate_c + 1.0 NADP__c = 1.0 L_Tyrosine_c + 1.0 CO2_c + 1.0 NADPH_c
rxn00525	0	1.0 L_Arogenate_c + 1.0 NAD__c = 1.0 L_Tyrosine_c + 1.0 NADH_c + 1.0 CO2_c
rxn00493	0	1.0 2_Oxoglutarate_c + 1.0 L_Phenylalanine_c = 1.0 L_Glutamate_c + 1.0 Phenylpyruvate_c
rxn00474	0	1.0 Indole_c + 1.0 L_Serine_c = 1.0 L_Tryptophan_c + 1.0 H2O_c
rxn00461	0	1.0 UDP_N_acetyl_D_glucosamine_c + 1.0 Phosphoenolpyruvate_c = 1.0 H__c + 1.0 Orthophosphate_c + 1.0 UDP_N_acetyl_3__1_carboxyvinyl__D_glucosamine_c
rxn00459	0	1.0 2_Phospho_D_glycerate_c = 1.0 H2O_c + 1.0 Phosphoenolpyruvate_c
rxn00441	0	1.0 Thiamin_diphosphate_c + 1.0 2_Oxoglutarate_c + 1.0 H__c = 1.0 3_Carboxy_1_hydroxypropyl_ThPP_c + 1.0 CO2_c
rxn00420	0	1.0 H2O_c + 1.0 phosphoserine_c = 1.0 H__c + 1.0 Orthophosphate_c + 1.0 L_Serine_c
rxn00414	0	1.0 L_Glutamine_c + 1.0 H2O_c + 1.0 HCO3__c + 2.0 ATP_c = 2.0 ADP_c + 1.0 H__c + 1.0 Orthophosphate_c + 1.0 L_Glutamate_c + 1.0 Carbamoyl_phosphate_c
rxn00410	0	1.0 UTP_c + 1.0 ATP_c + 1.0 NH3_c = 1.0 CTP_c + 2.0 H__c + 1.0 Orthophosphate_c + 1.0 ADP_c
rxn00392	0	1.0 Riboflavin_c + 1.0 ATP_c = 1.0 FMN_c + 1.0 ADP_c
rxn00337	0	1.0 H__c + 1.0 L_Aspartate_c + 1.0 ATP_c = 1.0 4_Phospho_L_aspartate_c + 1.0 ADP_c
rxn00313	0	1.0 H__c + 1.0 meso_2_6_Diaminoheptanedioate_c = 1.0 L_Lysine_c + 1.0 CO2_c
rxn00303	0	1.0 GTP_c + 1.0 ATP_c = 1.0 AMP_c + 1.0 Guanosine_3__diphosphate_5__triphosphate_c
rxn00302	0	1.0 H2O_c + 1.0 GTP_c = 1.0 Formamidopyrimidine_nucleoside_triphosphate_c
rxn00300	0	3.0 H2O_c + 1.0 GTP_c = 1.0 H__c + 1.0 Diphosphate_c + 1.0 Formate_c + 1.0 2_5_Diamino_6__5__phosphoribosylamino__4_pyrimidineone_c
rxn00299	0	1.0 H2O_c + 1.0 GTP_c = 1.0 2_Amino_4_hydroxy_6__erythro_1_2_3_trihydroxypropyl_dihydropteridine_triphosphate_c + 1.0 Formate_c + 1.0 H__c
rxn00297	0	1.0 UDP_N_acetyl_D_glucosamine_c = 1.0 UDP_N_acetyl_D_mannosamine_c
rxn00295	0	1.0 UDP_N_acetyl_D_glucosamine_c = 1.0 UDP_N_acetyl_D_galactosamine_c
rxn00293	0	1.0 N_Acetyl_D_glucosamine_1_phosphate_c + 1.0 UTP_c = 1.0 UDP_N_acetyl_D_glucosamine_c + 1.0 Diphosphate_c
rxn00288	0	1.0 Succinate_c + 1.0 FAD_c = 1.0 FADH2_c + 1.0 Fumarate_c
rxn00256	0	1.0 H2O_c + 1.0 Acetyl_CoA_c + 1.0 Oxaloacetate_c = 1.0 Citrate_c + 1.0 CoA_c + 1.0 H__c
rxn00239	0	1.0 GMP_c + 1.0 ATP_c = 1.0 GDP_c + 1.0 ADP_c
rxn00224	0	1.0 Protoporphyrin_c + 1.0 Fe2__c = 2.0 H__c + 1.0 Heme_c
rxn00199	0	1.0 Oxalosuccinate_c + 1.0 H__c = 1.0 2_Oxoglutarate_c + 1.0 CO2_c
rxn00193	0	1.0 L_Glutamate_c = 1.0 D_Glutamate_c
rxn00192	0	1.0 L_Glutamate_c + 1.0 Acetyl_CoA_c = 1.0 H__c + 1.0 CoA_c + 1.0 N_Acetyl_L_glutamate_c
rxn00187	0	1.0 L_Glutamate_c + 1.0 ATP_c + 1.0 NH3_c = 1.0 L_Glutamine_c + 1.0 H__c + 1.0 Orthophosphate_c + 1.0 ADP_c
rxn00179	0	1.0 H__c + 1.0 L_Glutamate_c + 1.0 ATP_c = 1.0 L_Glutamyl_5_phosphate_c + 1.0 ADP_c
rxn00148	0	1.0 Pyruvate_c + 1.0 ATP_c = 1.0 ADP_c + 1.0 Phosphoenolpyruvate_c
rxn00138	0	1.0 Deamino_NAD__c + 1.0 ATP_c + 1.0 NH3_c = 1.0 NAD__c + 1.0 Diphosphate_c + 1.0 AMP_c
rxn00126	0	1.0 H2O_c + 1.0 L_Methionine_c + 1.0 ATP_c = 1.0 Orthophosphate_c + 1.0 S_Adenosyl_L_methionine_c + 1.0 Diphosphate_c
rxn00122	0	1.0 FMN_c + 1.0 ATP_c = 1.0 Diphosphate_c + 1.0 FAD_c
rxn00119	0	1.0 UMP_c + 1.0 ATP_c = 1.0 UDP_c + 1.0 ADP_c
rxn00100	0	1.0 Dephospho_CoA_c + 1.0 ATP_c = 1.0 CoA_c + 1.0 ADP_c
rxn00077	0	1.0 NAD__c + 1.0 ATP_c = 1.0 ADP_c + 1.0 NADP__c
rxn00062	0	1.0 H2O_c + 1.0 ATP_c = 1.0 H__c + 1.0 Orthophosphate_c + 1.0 ADP_c
rxn00060	0	1.0 H2O_c + 4.0 Porphobilinogen_c = 1.0 Hydroxymethylbilane_c + 4.0 NH3_c
rxn00056	0	4.0 H__c + 4.0 Fe2__c + 1.0 Oxygen_c = 2.0 H2O_c + 4.0 Fe3__c
rxn00048	0	2.0 6_7_Dimethyl_8__1_D_ribityl_lumazine_c = 1.0 Riboflavin_c + 1.0 5_Amino_6__1_D_ribitylamino_uracil_c
rxn00029	0	2.0 5_Aminolevulinate_c = 1.0 H__c + 2.0 H2O_c + 1.0 Porphobilinogen_c
rxn00011	0	1.0 Pyruvate_c + 1.0 Thiamin_diphosphate_c + 1.0 H__c = 1.0 CO2_c + 1.0 2__alpha_Hydroxyethyl_thiamine_diphosphate_c
rxn00001	0	1.0 H2O_c + 1.0 Diphosphate_c = 2.0 H__c + 2.0 Orthophosphate_c
bio00089	0	40.0 H2O_c + 40.0000046142488 ATP_c + 0.00000722230247002744 CMP_c + 0.00000579945485124398 CDP_c + 0.0000596302921884317 Potassium_c + 0.0000142401458190932 di_trans_poly_cis_Undecaprenyl_diphosphate_c + 0.00000208062851626219 Stearoyllipoteichoic_acid__n_24___linked__D_alanine_substituted_c + 0.0000415282392026578 Fe2__c + 0.0000132135306553911 Diphosphate_c + 0.00000297009118179928 FAD_c + 0.0…
R99999	0	1.0 Succinyl_CoA_c = 1.0 Methylmalonyl_CoA_c
R08583	0	1.0 dTDP_3_oxo_4_6_dideoxy_D_glucose_c + 1.0 NH3_c = 1.0 dTDP_4_amino_4_6_dideoxy_D_glucose_c
R06513	0	1.0 H2O_c + 1.0 4_6_Dideoxy_4_oxo_dTDP_D_glucose_c = 1.0 dTDP_glucose_c
R06506	0	1.0 dTDP_c + 1.0 Megalomicin_A_c = 1.0 dTDP_L_megosamine_c + 1.0 Erythromycin_C_c
R06503	0	1.0 Megalomicin_B_c = 1.0 Megalomicin_A_c
R06499	0	1.0 dTDP_c + 1.0 Avermectin_A1b_c = 1.0 Avermectin_A1b_monosaccharide_c + 1.0 dTDP_L_oleandrose_c
R06498	0	1.0 Avermectin_A1b_monosaccharide_c + 1.0 dTDP_c = 1.0 dTDP_L_oleandrose_c + 1.0 Avermectin_A1b_aglycone_c
R06497	0	1.0 Avermectin_B1b_c + 1.0 dTDP_c = 1.0 dTDP_L_oleandrose_c + 1.0 Avermectin_B1b_monosaccharide_c
R06496	0	1.0 dTDP_c + 1.0 Avermectin_B1b_monosaccharide_c = 1.0 Avermectin_B1b_aglycone_c + 1.0 dTDP_L_oleandrose_c
R06491	0	1.0 Avermectin_A1a_c + 1.0 dTDP_c = 1.0 dTDP_L_oleandrose_c + 1.0 Avermectin_A1a_monosaccharide_c
R06490	0	1.0 dTDP_c + 1.0 Avermectin_A1a_monosaccharide_c = 1.0 Avermectin_A1a_aglycone_c + 1.0 dTDP_L_oleandrose_c
R06489	0	1.0 dTDP_c + 1.0 Avermectin_B1a_c = 1.0 Avermectin_B1a_monosaccharide_c + 1.0 dTDP_L_oleandrose_c
R06488	0	1.0 Avermectin_B1a_monosaccharide_c + 1.0 dTDP_c = 1.0 dTDP_L_oleandrose_c + 1.0 Avermectin_B1a_aglycone_c
R06479	0	1.0 S_Adenosyl_L_homocysteine_c + 1.0 Avermectin_A1b_aglycone_c = 1.0 S_Adenosyl_L_methionine_c + 1.0 Avermectin_B1b_aglycone_c
R06477	0	1.0 Avermectin_A1a_aglycone_c + 1.0 S_Adenosyl_L_homocysteine_c = 1.0 S_Adenosyl_L_methionine_c + 1.0 Avermectin_B1a_aglycone_c
R06475	0	1.0 Avermectin_B1b_aglycone_c + 1.0 NADP__c = 1.0 NADPH_c + 1.0 5_Oxoavermectin___1b___aglycone_c + 1.0 H__c
R06473	0	1.0 Avermectin_B1a_aglycone_c + 1.0 NADP__c = 1.0 5_Oxoavermectin___1a___aglycone_c + 1.0 NADPH_c + 1.0 H__c
R06470	0	1.0 H2O_c + 1.0 5_Oxoavermectin___1b___aglycone_c + 1.0 NADP__c = 1.0 NADPH_c + 1.0 Oxygen_c + 1.0 6_8a_Seco_6_8a_deoxy_5_oxoavermectin___1b___aglycone_c
R06467	0	1.0 5_Oxoavermectin___1a___aglycone_c + 1.0 H2O_c + 1.0 NADP__c = 1.0 6_8a_Seco_6_8a_deoxy_5_oxoavermectin___1a___aglycone_c + 1.0 NADPH_c + 1.0 Oxygen_c
R06464	0	1.0 H2O_c + 1.0 Pikromycin_c + 1.0 NADP__c = 1.0 NADPH_c + 1.0 Narbomycin_c + 1.0 Oxygen_c + 1.0 H__c
R06463	0	1.0 H2O_c + 1.0 Methymycin_c + 1.0 NADP__c = 1.0 NADPH_c + 1.0 Oxygen_c + 1.0 YC_17_c
R06462	0	1.0 H2O_c + 1.0 Neomethymycin_c + 1.0 NADP__c = 1.0 NADPH_c + 1.0 Oxygen_c + 1.0 YC_17_c
R06461	0	1.0 dTDP_c + 1.0 Narbomycin_c = 1.0 Narbonolide_c + 1.0 dTDP_D_desosamine_c
R06460	0	1.0 dTDP_c + 1.0 YC_17_c = 1.0 10_Deoxymethynolide_c + 1.0 dTDP_D_desosamine_c
R06457	0	1.0 dTDP_c + 1.0 Oleandomycin_c = 1.0 L_Oleandrosyl_oleandolide_c + 1.0 dTDP_D_desosamine_c
R06456	0	1.0 L_Oleandrosyl_oleandolide_c + 1.0 S_Adenosyl_L_homocysteine_c = 1.0 S_Adenosyl_L_methionine_c + 1.0 L_Olivosyl_oleandolide_c
R06455	0	1.0 dTDP_c + 1.0 L_Olivosyl_oleandolide_c = 1.0 Oleandolide_c + 1.0 dTDP_L_olivose_c
R06454	0	1.0 H2O_c + 1.0 Oleandolide_c + 1.0 NADP__c = 1.0 H__c + 1.0 NADPH_c + 1.0 Oxygen_c + 1.0 8_8a_Deoxyoleandolide_c
R06452	0	1.0 dTDP_c + 1.0 Demethylmacrocin_c = 1.0 Demethyllactenocin_c + 1.0 dTDP_L_mycarose_c
R06451	0	1.0 Demethyllactenocin_c + 1.0 dTDP_c = 1.0 5_O_beta_D_Mycaminosyltylonolide_c + 1.0 dTDP_6_deoxy_D_allose_c
R06450	0	1.0 5_O_beta_D_Mycaminosyltylactone_c + 1.0 dTDP_c = 1.0 dTDP_D_mycaminose_c + 1.0 Tylactone_c
R06449	0	4.0 H2O_c + 1.0 5_O_beta_D_Mycaminosyltylonolide_c + 3.0 NADP__c = 1.0 5_O_beta_D_Mycaminosyltylactone_c + 3.0 NADPH_c + 3.0 Oxygen_c + 3.0 H__c
R06443	0	1.0 Maltol_c = 1.0 dTDP_2_6_dideoxy_D_glycero_hex_2_enos_4_ulose_c
R06436	0	1.0 dTDP_L_mycarose_c + 1.0 NADP__c = 1.0 H__c + 1.0 dTDP_3_methyl_4_oxo_2_6_dideoxy_L_glucose_c + 1.0 NADPH_c
R06435	0	1.0 H__c + 1.0 dTDP_3_methyl_4_oxo_2_6_dideoxy_L_glucose_c + 1.0 S_Adenosyl_L_homocysteine_c = 1.0 S_Adenosyl_L_methionine_c + 1.0 dTDP_4_oxo_2_6_dideoxy_L_mannose_c
R06433	0	1.0 dTDP_4_oxo_2_6_dideoxy_L_mannose_c = 1.0 dTDP_4_oxo_2_6_dideoxy_D_allose_c
R06429	0	1.0 dTDP_4_oxo_2_6_dideoxy_D_allose_c + 1.0 NADP__c = 1.0 dTDP_2_6_dideoxy_D_glycero_hex_2_enos_4_ulose_c + 1.0 NADPH_c + 1.0 H__c
R06428	0	1.0 H2O_c + 1.0 dTDP_2_6_dideoxy_D_glycero_hex_2_enos_4_ulose_c = 1.0 4_6_Dideoxy_4_oxo_dTDP_D_glucose_c
R06427	0	2.0 S_Adenosyl_L_homocysteine_c + 1.0 dTDP_D_desosamine_c = 1.0 dTDP_3_amino_3_4_6_trideoxy_D_glucose_c + 2.0 S_Adenosyl_L_methionine_c
R06426	0	1.0 dTDP_3_amino_3_4_6_trideoxy_D_glucose_c + 1.0 2_Oxoglutarate_c = 1.0 L_Glutamate_c + 1.0 dTDP_3_oxo_4_6_dideoxy_D_glucose_c
R06424	0	1.0 3_6_Dideoxy_3_oxo_dTDP_D_glucose_c = 1.0 4_6_Dideoxy_4_oxo_dTDP_D_glucose_c
R05532	0	1.0 S_Adenosyl_L_methionine_c + 1.0 Erythromycin_D_c = 1.0 Erythromycin_B_c + 1.0 S_Adenosyl_L_homocysteine_c
R05531	0	1.0 dTDP_c + 1.0 Erythromycin_D_c = 1.0 3_O_Mycarosylerythronolide_B_c + 1.0 dTDP_D_desosamine_c
R05530	0	1.0 dTDP_L_mycarose_c + 1.0 Erythronolide_B_c = 1.0 3_O_Mycarosylerythronolide_B_c + 1.0 dTDP_c
R05522	0	1.0 Erythromycin_D_c = 1.0 Erythromycin_C_c
R05521	0	1.0 Erythromycin_B_c = 1.0 Erythromycin_c
R05520	0	1.0 S_Adenosyl_L_methionine_c + 1.0 Erythromycin_C_c = 1.0 Erythromycin_c + 1.0 S_Adenosyl_L_homocysteine_c
R05373	0	1.0 Propanoyl_CoA_c + 1.0 CO2_c = 1.0 Methylmalonyl_CoA_c
R05270	0	1.0 Erythronolide_B_c = 1.0 6_Deoxyerythronolide_B_c + 1.0 Oxygen_c
R02859	0	1.0 Macrocin_c + 1.0 S_Adenosyl_L_homocysteine_c = 1.0 S_Adenosyl_L_methionine_c + 1.0 Demethylmacrocin_c
R02858	0	1.0 S_Adenosyl_L_homocysteine_c + 1.0 Tylosin_c = 1.0 Macrocin_c + 1.0 S_Adenosyl_L_methionine_c
R02773	0	1.0 L_Glutamate_c + 1.0 4_6_Dideoxy_4_oxo_dTDP_D_glucose_c = 1.0 2_Oxoglutarate_c + 1.0 dTDP_4_amino_4_6_dideoxy_D_glucose_c
R02328	0	1.0 dTDP_glucose_c + 1.0 Diphosphate_c = 1.0 dTTP_c + 1.0 D_Glucose_1_phosphate_c
R00918	0	1.0 H2O_c + 6.0 CO2_c + 7.0 CoA_c + 1.0 6_Deoxyerythronolide_B_c + 6.0 NADP__c = 1.0 Propanoyl_CoA_c + 6.0 NADPH_c + 6.0 Methylmalonyl_CoA_c + 6.0 H__c
EX_cpd15606_e	0	1.000000 Gly_Tyr_e = 1.000000 Gly_Tyr_ext
EX_cpd15605_e	0	1.000000 Gly_Phe_e = 1.000000 Gly_Phe_ext
EX_cpd15604_e	0	1.000000 Gly_Leu_e = 1.000000 Gly_Leu_ext
EX_cpd15603_e	0	1.000000 Gly_Cys_e = 1.000000 Gly_Cys_ext
EX_cpd11597_e	0	1.000000 ARSENOBETAINE_e = 1.000000 ARSENOBETAINE_ext
EX_cpd11596_e	0	1.000000 butanesulfonate_e = 1.000000 butanesulfonate_ext
EX_cpd11595_e	0	1.000000 chromate_e = 1.000000 chromate_ext
EX_cpd11593_e	0	1.000000 ala_L_asp_L_e = 1.000000 ala_L_asp_L_ext
EX_cpd11592_e	0	1.000000 gly_glu_L_e = 1.000000 gly_glu_L_ext
EX_cpd11591_e	0	1.000000 Gly_Met_e = 1.000000 Gly_Met_ext
EX_cpd11590_e	0	1.000000 met_L_ala_L_e = 1.000000 met_L_ala_L_ext
EX_cpd11589_e	0	1.000000 gly_asp_L_e = 1.000000 gly_asp_L_ext
EX_cpd11588_e	0	1.000000 gly_pro_L_e = 1.000000 gly_pro_L_ext
EX_cpd11587_e	0	1.000000 Ala_Gln_e = 1.000000 Ala_Gln_ext
EX_cpd11586_e	0	1.000000 ala_L_glu_L_e = 1.000000 ala_L_glu_L_ext
EX_cpd11585_e	0	1.000000 L_alanylglycine_e = 1.000000 L_alanylglycine_ext
EX_cpd11584_e	0	1.000000 Ala_His_e = 1.000000 Ala_His_ext
EX_cpd11583_e	0	1.000000 Ala_Leu_e = 1.000000 Ala_Leu_ext
EX_cpd11582_e	0	1.000000 ala_L_Thr_L_e = 1.000000 ala_L_Thr_L_ext
EX_cpd11581_e	0	1.000000 gly_asn_L_e = 1.000000 gly_asn_L_ext
EX_cpd11580_e	0	1.000000 Gly_Gln_e = 1.000000 Gly_Gln_ext
EX_cpd11579_e	0	1.000000 ethanesulfonate_e = 1.000000 ethanesulfonate_ext
EX_cpd11578_e	0	1.000000 hexanesulfonate_e = 1.000000 hexanesulfonate_ext
EX_cpd11576_e	0	1.000000 L_methionine_R_oxide_e = 1.000000 L_methionine_R_oxide_ext
EX_cpd11575_e	0	1.000000 MOPS_e = 1.000000 MOPS_ext
EX_cpd11574_e	0	1.000000 Molybdate_e = 1.000000 Molybdate_ext
EX_cpd11416_c	0	1.000000 Biomass_c = 1.000000 Biomass_ext
EX_cpd10516_e	0	1.000000 Fe3__e = 1.000000 Fe3__ext
EX_cpd10515_e	0	1.000000 Fe2__e = 1.000000 Fe2__ext
EX_cpd09878_e	0	1.000000 Sulfoacetate_e = 1.000000 Sulfoacetate_ext
EX_cpd08306_e	0	1.000000 Butyro_betaine_e = 1.000000 Butyro_betaine_ext
EX_cpd08305_e	0	1.000000 Crotono_betaine_e = 1.000000 Crotono_betaine_ext
EX_cpd08023_e	0	1.000000 Methanesulfonic_acid_e = 1.000000 Methanesulfonic_acid_ext
EX_cpd04098_e	0	1.000000 Arsenite_e = 1.000000 Arsenite_ext
EX_cpd04097_e	0	1.000000 Lead_e = 1.000000 Lead_ext
EX_cpd03725_e	0	1.000000 Fe_III_dicitrate_e = 1.000000 Fe_III_dicitrate_ext
EX_cpd03724_e	0	1.000000 Ferrichrome_e = 1.000000 Ferrichrome_ext
EX_cpd03696_e	0	1.000000 Arbutin_e = 1.000000 Arbutin_ext
EX_cpd03424_e	0	1.000000 Vitamin_B12_e = 1.000000 Vitamin_B12_ext
EX_cpd03279_e	0	1.000000 Deoxyinosine_e = 1.000000 Deoxyinosine_ext
EX_cpd03048_e	0	1.000000 2_Hydroxyethanesulfonate_e = 1.000000 2_Hydroxyethanesulfonate_ext
EX_cpd01914_e	0	1.000000 L_Methionine_S_oxide_e = 1.000000 L_Methionine_S_oxide_ext
EX_cpd01912_e	0	1.000000 L_Fucose_1_phosphate_e = 1.000000 L_Fucose_1_phosphate_ext
EX_cpd01329_e	0	1.000000 Maltohexaose_e = 1.000000 Maltohexaose_ext
EX_cpd01262_e	0	1.000000 Maltotriose_e = 1.000000 Maltotriose_ext
EX_cpd01242_e	0	1.000000 Deoxyribose_e = 1.000000 Deoxyribose_ext
EX_cpd01171_e	0	1.000000 Galactitol_e = 1.000000 Galactitol_ext
EX_cpd01092_e	0	1.000000 _S_____Allantoin_e = 1.000000 _S_____Allantoin_ext
EX_cpd01080_e	0	1.000000 Octadecanoic_acid_e = 1.000000 Octadecanoic_acid_ext
EX_cpd01048_e	0	1.000000 Arsenic_acid_e = 1.000000 Arsenic_acid_ext
EX_cpd01030_e	0	1.000000 Salicin_e = 1.000000 Salicin_ext
EX_cpd01017_e	0	1.000000 Cys_Gly_e = 1.000000 Cys_Gly_ext
EX_cpd01012_e	0	1.000000 Cadmium_e = 1.000000 Cadmium_ext
EX_cpd00971_e	0	1.000000 Sodium_e = 1.000000 Sodium_ext
EX_cpd00797_e	0	1.000000 _R__3_Hydroxybutanoate_e = 1.000000 _R__3_Hydroxybutanoate_ext
EX_cpd00654_e	0	1.000000 Deoxycytidine_e = 1.000000 Deoxycytidine_ext
EX_cpd00653_e	0	1.000000 D_Galactonate_e = 1.000000 D_Galactonate_ext
EX_cpd00652_e	0	1.000000 D_Galactarate_e = 1.000000 D_Galactarate_ext
EX_cpd00644_e	0	1.000000 Pantothenate_e = 1.000000 Pantothenate_ext
EX_cpd00637_e	0	1.000000 D_Methionine_e = 1.000000 D_Methionine_ext
EX_cpd00635_e	0	1.000000 Cob_I_alamin_e = 1.000000 Cob_I_alamin_ext
EX_cpd00609_e	0	1.000000 D_Glucarate_e = 1.000000 D_Glucarate_ext
EX_cpd00588_e	0	1.000000 D_Sorbitol_e = 1.000000 D_Sorbitol_ext
EX_cpd00573_e	0	1.000000 L_Idonate_e = 1.000000 L_Idonate_ext
EX_cpd00550_e	0	1.000000 D_Serine_e = 1.000000 D_Serine_ext
EX_cpd00540_e	0	1.000000 Betaine_e = 1.000000 Betaine_ext
EX_cpd00531_e	0	1.000000 Mercury_2___e = 1.000000 Mercury_2___ext
EX_cpd00516_e	0	1.000000 meso_2_6_Diaminoheptanedioate_e = 1.000000 meso_2_6_Diaminoheptanedioate_ext
EX_cpd00438_e	0	1.000000 Deoxyadenosine_e = 1.000000 Deoxyadenosine_ext
EX_cpd00423_e	0	1.000000 Cob_II_alamin_e = 1.000000 Cob_II_alamin_ext
EX_cpd00412_e	0	1.000000 Deoxyuridine_e = 1.000000 Deoxyuridine_ext
EX_cpd00395_e	0	1.000000 L_Cysteate_e = 1.000000 L_Cysteate_ext
EX_cpd00393_e	0	1.000000 Folate_e = 1.000000 Folate_ext
EX_cpd00367_e	0	1.000000 Cytidine_e = 1.000000 Cytidine_ext
EX_cpd00355_e	0	1.000000 Nicotinamide_D_ribonucleotide_e = 1.000000 Nicotinamide_D_ribonucleotide_ext
EX_cpd00322_e	0	1.000000 L_Isoleucine_e = 1.000000 L_Isoleucine_ext
EX_cpd00314_e	0	1.000000 Mannitol_e = 1.000000 Mannitol_ext
EX_cpd00309_e	0	1.000000 Xanthine_e = 1.000000 Xanthine_ext
EX_cpd00307_e	0	1.000000 Cytosine_e = 1.000000 Cytosine_ext
EX_cpd00305_e	0	1.000000 Thiamine_e = 1.000000 Thiamine_ext
EX_cpd00281_e	0	1.000000 4_Aminobutanoate_e = 1.000000 4_Aminobutanoate_ext
EX_cpd00277_e	0	1.000000 Deoxyguanosine_e = 1.000000 Deoxyguanosine_ext
EX_cpd00268_e	0	1.000000 Thiosulfate_e = 1.000000 Thiosulfate_ext
EX_cpd00264_e	0	1.000000 Spermidine_e = 1.000000 Spermidine_ext
EX_cpd00254_e	0	1.000000 Magnesium_e = 1.000000 Magnesium_ext
EX_cpd00249_e	0	1.000000 Uridine_e = 1.000000 Uridine_ext
EX_cpd00246_e	0	1.000000 Inosine_e = 1.000000 Inosine_ext
EX_cpd00244_e	0	1.000000 Nickel_e = 1.000000 Nickel_ext
EX_cpd00235_e	0	1.000000 D_Mannose_6_phosphate_e = 1.000000 D_Mannose_6_phosphate_ext
EX_cpd00226_e	0	1.000000 Hypoxanthine_e = 1.000000 Hypoxanthine_ext
EX_cpd00224_e	0	1.000000 L_Arabinose_e = 1.000000 L_Arabinose_ext
EX_cpd00222_e	0	1.000000 D_Gluconic_acid_e = 1.000000 D_Gluconic_acid_ext
EX_cpd00220_e	0	1.000000 Riboflavin_e = 1.000000 Riboflavin_ext
EX_cpd00218_e	0	1.000000 Nicotinate_e = 1.000000 Nicotinate_ext
EX_cpd00211_e	0	1.000000 Butanoic_acid_e = 1.000000 Butanoic_acid_ext
EX_cpd00210_e	0	1.000000 Taurine_e = 1.000000 Taurine_ext
EX_cpd00209_e	0	1.000000 Nitrate_e = 1.000000 Nitrate_ext
EX_cpd00208_e	0	1.000000 Lactose_e = 1.000000 Lactose_ext
EX_cpd00205_e	0	1.000000 Potassium_e = 1.000000 Potassium_ext
EX_cpd00184_e	0	1.000000 Thymidine_e = 1.000000 Thymidine_ext
EX_cpd00182_e	0	1.000000 Adenosine_e = 1.000000 Adenosine_ext
EX_cpd00179_e	0	1.000000 Maltose_e = 1.000000 Maltose_ext
EX_cpd00176_e	0	1.000000 2_Dehydro_3_deoxy_D_gluconate_e = 1.000000 2_Dehydro_3_deoxy_D_gluconate_ext
EX_cpd00162_e	0	1.000000 Ethanolamine_e = 1.000000 Ethanolamine_ext
EX_cpd00159_e	0	1.000000 _S__Lactate_e = 1.000000 _S__Lactate_ext
EX_cpd00158_e	0	1.000000 Cellobiose_e = 1.000000 Cellobiose_ext
EX_cpd00156_e	0	1.000000 L_Valine_e = 1.000000 L_Valine_ext
EX_cpd00154_e	0	1.000000 D_Xylose_e = 1.000000 D_Xylose_ext
EX_cpd00149_e	0	1.000000 Cobalt_e = 1.000000 Cobalt_ext
EX_cpd00142_e	0	1.000000 Acetoacetate_e = 1.000000 Acetoacetate_ext
EX_cpd00138_e	0	1.000000 D_Mannose_e = 1.000000 D_Mannose_ext
EX_cpd00137_e	0	1.000000 Citrate_e = 1.000000 Citrate_ext
EX_cpd00130_e	0	1.000000 _S__Malate_e = 1.000000 _S__Malate_ext
EX_cpd00129_e	0	1.000000 L_Proline_e = 1.000000 L_Proline_ext
EX_cpd00122_e	0	1.000000 N_Acetyl_D_glucosamine_e = 1.000000 N_Acetyl_D_glucosamine_ext
EX_cpd00121_e	0	1.000000 myo_Inositol_e = 1.000000 myo_Inositol_ext
EX_cpd00118_e	0	1.000000 Putrescine_e = 1.000000 Putrescine_ext
EX_cpd00117_e	0	1.000000 D_Alanine_e = 1.000000 D_Alanine_ext
EX_cpd00108_e	0	1.000000 D_Galactose_e = 1.000000 D_Galactose_ext
EX_cpd00107_e	0	1.000000 L_Leucine_e = 1.000000 L_Leucine_ext
EX_cpd00106_e	0	1.000000 Fumarate_e = 1.000000 Fumarate_ext
EX_cpd00105_e	0	1.000000 D_Ribose_e = 1.000000 D_Ribose_ext
EX_cpd00104_e	0	1.000000 Biotin_e = 1.000000 Biotin_ext
EX_cpd00100_e	0	1.000000 Glycerol_e = 1.000000 Glycerol_ext
EX_cpd00099_e	0	1.000000 Cl__e = 1.000000 Cl__ext
EX_cpd00098_e	0	1.000000 Choline_e = 1.000000 Choline_ext
EX_cpd00092_e	0	1.000000 Uracil_e = 1.000000 Uracil_ext
EX_cpd00084_e	0	1.000000 L_Cysteine_e = 1.000000 L_Cysteine_ext
EX_cpd00082_e	0	1.000000 D_Fructose_e = 1.000000 D_Fructose_ext
EX_cpd00080_e	0	1.000000 sn_Glycerol_3_phosphate_e = 1.000000 sn_Glycerol_3_phosphate_ext
EX_cpd00079_e	0	1.000000 D_Glucose_6_phosphate_e = 1.000000 D_Glucose_6_phosphate_ext
EX_cpd00075_e	0	1.000000 Nitrite_e = 1.000000 Nitrite_ext
EX_cpd00073_e	0	1.000000 Urea_e = 1.000000 Urea_ext
EX_cpd00069_e	0	1.000000 L_Tyrosine_e = 1.000000 L_Tyrosine_ext
EX_cpd00067_e	0	1.000000 H__e = 1.000000 H__ext
EX_cpd00066_e	0	1.000000 L_Phenylalanine_e = 1.000000 L_Phenylalanine_ext
EX_cpd00065_e	0	1.000000 L_Tryptophan_e = 1.000000 L_Tryptophan_ext
EX_cpd00064_e	0	1.000000 L_Ornithine_e = 1.000000 L_Ornithine_ext
EX_cpd00063_e	0	1.000000 Calcium_e = 1.000000 Calcium_ext
EX_cpd00060_e	0	1.000000 L_Methionine_e = 1.000000 L_Methionine_ext
EX_cpd00058_e	0	1.000000 Copper2_e = 1.000000 Copper2_ext
EX_cpd00054_e	0	1.000000 L_Serine_e = 1.000000 L_Serine_ext
EX_cpd00053_e	0	1.000000 L_Glutamine_e = 1.000000 L_Glutamine_ext
[truncated: 20 more rows]

## Sheet: Tylosin
Reaction name	r2 value	Reaction formula
rxn00609	0.549523	1.0 Inositol_1_phosphate_c = 1.0 D_Glucose_6_phosphate_c
rxn00141	0.549523	1.0 H2O_c + 1.0 S_Adenosyl_L_homocysteine_c = 1.0 L_Homocysteine_c + 1.0 Adenosine_c
rxn08793	0.49366	1.0 Menaquinone_8_c + 1.0 _S__Lactate_c = 1.0 Pyruvate_c + 1.0 Menaquinol_8_c
rxn08792	0.49366	1.0 _S__Lactate_c + 1.0 Ubiquinone_8_c = 1.0 Pyruvate_c + 1.0 Ubiquinol_8_c
rxn00145	0.49366	1.0 _S__Lactate_c + 2.0 Ferricytochrome_c_c = 1.0 Pyruvate_c + 2.0 H__c + 2.0 Ferrocytochrome_c_c
rxn00330	0.444214	1.0 H2O_c + 1.0 Acetyl_CoA_c + 1.0 Glyoxylate_c = 1.0 _S__Malate_c + 1.0 CoA_c + 1.0 H__c
rxn00371	0.374494	1.0 NAD__c + 1.0 Formate_c = 1.0 NADH_c + 1.0 CO2_c
rxn05239	0.371508	1.0 3__Phosphoadenylyl_sulfate_c + 1.0 trdrd_c = 1.0 Sulfite_c + 1.0 trdox_c + 1.0 Adenosine_3__5__bisphosphate_c
t_cpd01171	0.326267	1.0 Phosphoenolpyruvate_c + 1.0 Galactitol_e = 1.0 Pyruvate_c + 1.0 Galactitol_1_phosphate_c
t_cpd00588	0.326267	1.0 Phosphoenolpyruvate_c + 1.0 D_Sorbitol_e = 1.0 Pyruvate_c + 1.0 Sorbitol_6_phosphate_c
t_cpd00108	0.326267	1.0 D_Galactose_e + 1.0 H__e = 1.0 H__c + 1.0 D_Galactose_c
t_cpd00084	0.326267	1.0 H2O_c + 1.0 L_Cysteine_e + 1.0 ATP_c = 1.0 H__c + 1.0 Orthophosphate_c + 1.0 L_Cysteine_c + 1.0 ADP_c
rxn10184	0.326267	1.0 Phosphoenolpyruvate_c + 1.0 D_Sorbitol_e = 1.0 Pyruvate_c + 1.0 Sorbitol_6_phosphate_c
rxn09674	0.326267	1.0 L_Lysine_e + 1.0 H__e = 1.0 L_Lysine_c + 1.0 H__c
rxn09450	0.326267	1.0 hexadecenoate_c + 1.0 CoA_c + 1.0 ATP_c + 1.0 H__c = 1.0 Diphosphate_c + 1.0 AMP_c + 1.0 Hexadecenoyl_CoA_c
rxn09449	0.326267	1.0 Octadecanoic_acid_c + 1.0 CoA_c + 1.0 ATP_c + 1.0 H__c = 1.0 Diphosphate_c + 1.0 Stearoyl_CoA_c + 1.0 AMP_c
rxn09448	0.326267	1.0 CoA_c + 1.0 octadecenoate_c + 1.0 ATP_c + 1.0 H__c = 1.0 Diphosphate_c + 1.0 AMP_c + 1.0 Octadecenoyl_CoA_c
rxn09128	0.326267	1.0 1_2_dioctadecanoyl_sn_glycerol_3_phosphate_c + 1.0 H2O_c = 1.0 2_octadecanoyl_sn_glycerol_3_phosphate_c + 1.0 H__c + 1.0 Octadecanoic_acid_c
rxn05890	0.326267	1.0 H2O_c + 1.0 Oxidized_c + 1.0 Nitric_oxide_c = 1.0 Reduced_c + 1.0 Nitrite_c + 2.0 H__c
rxn05736	0.326267	1.0 H__c + 1.0 CoA_c + 1.0 Tetradecanoic_acid_c + 1.0 ATP_c = 1.0 Tetradecanoyl_CoA_c + 1.0 Diphosphate_c + 1.0 AMP_c
rxn05610	0.326267	1.0 Phosphoenolpyruvate_c + 1.0 D_Mannose_e = 1.0 Pyruvate_c + 1.0 D_Mannose_6_phosphate_c
rxn05567	0.326267	1.0 Phosphoenolpyruvate_c + 1.0 Galactitol_e = 1.0 Pyruvate_c + 1.0 Galactitol_1_phosphate_c
rxn05566	0.326267	1.0 D_Galactose_e + 1.0 H__e = 1.0 H__c + 1.0 D_Galactose_c
rxn05252	0.326267	1.0 fa11_c + 1.0 CoA_c + 1.0 ATP_c + 1.0 H__c = 1.0 Diphosphate_c + 1.0 fa11coa_c + 1.0 AMP_c
rxn05251	0.326267	1.0 H__c + 1.0 CoA_c + 1.0 ATP_c + 1.0 fa12_c = 1.0 Diphosphate_c + 1.0 AMP_c + 1.0 fa12coa_c
rxn05250	0.326267	1.0 fa6_c + 1.0 H__c + 1.0 CoA_c + 1.0 ATP_c = 1.0 Diphosphate_c + 1.0 fa6coa_c + 1.0 AMP_c
rxn05249	0.326267	1.0 H__c + 1.0 CoA_c + 1.0 fa3_c + 1.0 ATP_c = 1.0 Diphosphate_c + 1.0 AMP_c + 1.0 fa3coa_c
rxn05248	0.326267	1.0 H__c + 1.0 CoA_c + 1.0 ATP_c + 1.0 fa4_c = 1.0 Diphosphate_c + 1.0 AMP_c + 1.0 fa4coa_c
rxn05247	0.326267	1.0 H__c + 1.0 fa1_c + 1.0 CoA_c + 1.0 ATP_c = 1.0 fa1coa_c + 1.0 Diphosphate_c + 1.0 AMP_c
rxn03885	0.326267	1.0 D_Mannonate_c = 1.0 H2O_c + 1.0 2_Dehydro_3_deoxy_D_gluconate_c
rxn03062	0.326267	1.0 NAD__c + 1.0 _2R_3S__3_Isopropylmalate_c = 1.0 _2S__2_Isopropyl_3_oxosuccinate_c + 1.0 H__c + 1.0 NADH_c
rxn02811	0.326267	1.0 _2R_3S__3_Isopropylmalate_c = 1.0 H2O_c + 1.0 2_Isopropylmaleate_c
rxn02789	0.326267	1.0 _2S__2_Isopropylmalate_c = 1.0 H2O_c + 1.0 2_Isopropylmaleate_c
rxn01352	0.326267	1.0 H2O_c + 1.0 dGTP_c = 1.0 H__c + 1.0 Deoxyguanosine_c + 1.0 Triphosphate_c
rxn01217	0.326267	1.0 dCMP_c + 1.0 H__c + 1.0 H2O_c = 1.0 NH3_c + 1.0 dUMP_c
rxn00947	0.326267	1.0 Hexadecanoic_acid_c + 1.0 CoA_c + 1.0 ATP_c + 1.0 H__c = 1.0 Palmitoyl_CoA_c + 1.0 Diphosphate_c + 1.0 AMP_c
rxn00902	0.326267	1.0 3_Methyl_2_oxobutanoic_acid_c + 1.0 H2O_c + 1.0 Acetyl_CoA_c = 1.0 _2S__2_Isopropylmalate_c + 1.0 CoA_c + 1.0 H__c
rxn00612	0.326267	1.0 sn_Glycerol_3_phosphate_c + 1.0 NADP__c = 1.0 Glycerone_phosphate_c + 1.0 H__c + 1.0 NADPH_c
rxn00611	0.326267	1.0 NAD__c + 1.0 sn_Glycerol_3_phosphate_c = 1.0 Glycerone_phosphate_c + 1.0 H__c + 1.0 NADH_c
rxn00213	0.326267	1.0 UTP_c + 1.0 D_Glucose_1_phosphate_c = 1.0 Diphosphate_c + 1.0 UDP_glucose_c
rxn00379	0.323009	1.0 Sulfate_c + 1.0 ATP_c + 1.0 H__c = 1.0 Diphosphate_c + 1.0 Adenylyl_sulfate_c
rxn11545	0.320982	0.5 Oxygen_c + 1.0 Precorrin_3A_c = 1.0 Precorrin_3B_c
rxn02305	0.315523	1.0 H__c + 1.0 4_Methyl_5__2_phosphoethyl__thiazole_c + 1.0 2_Methyl_4_amino_5_hydroxymethylpyrimidine_diphosphate_c = 1.0 Diphosphate_c + 1.0 Thiamin_monophosphate_c
rxn00346	0.315523	1.0 H__c + 1.0 L_Aspartate_c = 1.0 CO2_c + 1.0 beta_Alanine_c
rxn01207	0.31551	1.0 NAD__c + 1.0 4_Methyl_2_oxopentanoate_c + 1.0 CoA_c = 1.0 NADH_c + 1.0 3_Methylbutanoyl_CoA_c + 1.0 CO2_c
rxn01452	0.31183	1.0 _S__3_Hydroxybutanoyl_CoA_c + 1.0 NADP__c = 1.0 H__c + 1.0 NADPH_c + 1.0 Acetoacetyl_CoA_c
rxn07435	0.286108	1.0 2_Methyl_1_hydroxybutyl_ThPP_c + 1.0 Lipoamide_c = 1.0 Thiamin_diphosphate_c + 1.0 _Dihydrolipoyllysine_residue__2_methylpropanoyl_transferase__S__2_methylbutanoyl_dihydrolipoyllysine_c
rxn01807	0.283727	1.0 Pyridoxamine_c + 1.0 ATP_c = 1.0 Pyridoxamine_phosphate_c + 1.0 ADP_c
rxn01396	0.283727	1.0 Pyridoxine_c + 1.0 ATP_c = 1.0 Pyridoxine_phosphate_c + 1.0 ADP_c
rxn00124	0.283727	1.0 Pyridoxal_c + 1.0 ATP_c = 1.0 Pyridoxal_phosphate_c + 1.0 ADP_c
rxn00358	0.281499	1.0 UDP_D_galactose_c = 1.0 UDP_alpha_D_galacto_1_4_furanose_c
t_cpd00314	0.274678	1.0 Mannitol_e + 1.0 Phosphoenolpyruvate_c = 1.0 Pyruvate_c + 1.0 D_Mannitol_1_phosphate_c
rxn05617	0.274678	1.0 Mannitol_e + 1.0 Phosphoenolpyruvate_c = 1.0 Pyruvate_c + 1.0 D_Mannitol_1_phosphate_c
rxn03433	0.27396	1.0 H2O_c + 1.0 _S__3_Hydroxyisobutyryl_CoA_c = 1.0 H__c + 1.0 CoA_c + 1.0 3_Hydroxy_2_methylpropanoate_c
rxn07434	0.270748	1.0 Thiamin_diphosphate_c + 1.0 _S__3_Methyl_2_oxopentanoic_acid_c + 1.0 H__c = 1.0 CO2_c + 1.0 2_Methyl_1_hydroxybutyl_ThPP_c
rxn07433	0.267488	1.0 3_Methyl_1_hydroxybutyl_ThPP_c + 1.0 Lipoamide_c = 1.0 Thiamin_diphosphate_c + 1.0 _Dihydrolipoyllysine_residue__2_methylpropanoyl_transferase__S__3_methylbutanoyl_dihydrolipoyllysine_c
rxn07432	0.267488	1.0 Thiamin_diphosphate_c + 1.0 4_Methyl_2_oxopentanoate_c + 1.0 H__c = 1.0 3_Methyl_1_hydroxybutyl_ThPP_c + 1.0 CO2_c
rxn05153	0.256818	1.0 H2O_c + 1.0 ATP_c + 1.0 Sulfate_e = 1.0 Sulfate_c + 1.0 Orthophosphate_c + 1.0 ADP_c + 1.0 H__c
rxn00209	0.254457	1.0 Pyridoxine_phosphate_c + 1.0 Oxygen_c = 1.0 H2O2_c + 1.0 Pyridoxal_phosphate_c
rxn00208	0.254457	1.0 H2O_c + 1.0 Pyridoxamine_phosphate_c + 1.0 Oxygen_c = 1.0 H2O2_c + 1.0 Pyridoxal_phosphate_c + 1.0 NH3_c
rxn02792	0.245581	1.0 H__c + 1.0 L_Glutamate_c + 1.0 3_Cyano_L_alanine_c = 1.0 H2O_c + 1.0 CO2_c + 1.0 gamma_Glutamyl_beta_aminopropiononitrile_c
rxn02791	0.245581	1.0 L_Glutamate_c + 1.0 3_Cyano_L_alanine_c = 1.0 gamma_Glutamyl_beta_cyanoalanine_c + 1.0 H2O_c
rxn00350	0.245581	1.0 H2O_c + 1.0 Glutathione_c = 1.0 L_Glutamate_c + 1.0 Cys_Gly_c
rxn00872	0.237112	1.0 Butanoyl_CoA_c + 1.0 FAD_c = 1.0 FADH2_c + 1.0 Crotonoyl_CoA_c
rxn02144	0.231271	1.0 H2O_c + 1.0 2_Oxo_2_3_dihydrofuran_5_acetate_c = 1.0 H__c + 1.0 3_Oxoadipate_c
rxn01851	0.227183	1.0 NAD__c + 1.0 H2O_c + 1.0 4_Aminobutyraldehyde_c = 2.0 H__c + 1.0 NADH_c + 1.0 4_Aminobutanoate_c
rxn01329	0.227183	1.0 D_Mannose_6_phosphate_c = 1.0 D_Mannose_1_phosphate_c
rxn00559	0.227183	1.0 D_Mannose_6_phosphate_c = 1.0 D_Fructose_6_phosphate_c
rxn00549	0.227183	1.0 H2O_c + 1.0 D_Fructose_1_6_bisphosphate_c = 1.0 H__c + 1.0 Orthophosphate_c + 1.0 D_Fructose_6_phosphate_c
rxn01143	0.225743	1.0 Thymidine_c + 1.0 ATP_c = 1.0 dTMP_c + 1.0 ADP_c
t_cpd00355	0.22568	1.0 Nicotinamide_D_ribonucleotide_e = 1.0 Nicotinamide_D_ribonucleotide_c
rxn00305	0.225126	1.0 H__c + 1.0 GTP_c + 1.0 Oxaloacetate_c = 1.0 CO2_c + 1.0 GDP_c + 1.0 Phosphoenolpyruvate_c
rxn00101	0.223994	2.0 H__c + 1.0 H2O_c + 1.0 Urea_c = 1.0 CO2_c + 2.0 NH3_c
rxn02296	0.219523	1.0 H__c + 1.0 CoA_c + 1.0 ATP_c + 1.0 6_Carboxyhexanoate_c = 1.0 Diphosphate_c + 1.0 6_Carboxyhexanoyl_CoA_c + 1.0 AMP_c
rxn01924	0.217639	1.0 2_Methylpropanoyl_CoA_c + 1.0 FAD_c = 1.0 2_Methylprop_2_enoyl_CoA_c + 1.0 FADH2_c
rxn05466	0.213207	1.0 NH3_e = 1.0 NH3_c
rxn00147	0.211649	1.0 Pyruvate_c + 1.0 H2O_c + 1.0 ATP_c = 1.0 H__c + 1.0 Orthophosphate_c + 1.0 AMP_c + 1.0 Phosphoenolpyruvate_c
rxn02971	0.209001	1.0 2_5_Dihydro_5_oxofuran_2_acetate_c = 1.0 2_Oxo_2_3_dihydrofuran_5_acetate_c
rxn02269	0.208633	1.0 NAD__c + 1.0 _S__3_Methyl_2_oxopentanoic_acid_c + 1.0 CoA_c = 1.0 2_Methylbutanoyl_CoA_c + 1.0 NADH_c + 1.0 CO2_c
rxn07431	0.208608	1.0 2_Methyl_1_hydroxypropyl_ThPP_c + 1.0 Lipoamide_c = 1.0 Thiamin_diphosphate_c + 1.0 S__2_Methylpropanoyl__dihydrolipoamide_c
rxn07430	0.208608	1.0 3_Methyl_2_oxobutanoic_acid_c + 1.0 H__c + 1.0 Thiamin_diphosphate_c = 1.0 CO2_c + 1.0 2_Methyl_1_hydroxypropyl_ThPP_c
t_cpd03725	0.208474	1.0 H2O_c + 1.0 Fe_III_dicitrate_e + 1.0 ATP_c = 1.0 H__c + 1.0 Orthophosphate_c + 1.0 Fe_III_dicitrate_c + 1.0 ADP_c
rxn05189	0.208474	1.0 H2O_c + 1.0 Fe_III_dicitrate_e + 1.0 ATP_c = 1.0 H__c + 1.0 Orthophosphate_c + 1.0 Fe_III_dicitrate_c + 1.0 ADP_c
t_cpd00268	0.207896	1.0 H2O_c + 1.0 Thiosulfate_e + 1.0 ATP_c = 1.0 H__c + 1.0 Orthophosphate_c + 1.0 Thiosulfate_c + 1.0 ADP_c
rxn05176	0.207896	1.0 H2O_c + 1.0 Thiosulfate_e + 1.0 ATP_c = 1.0 H__c + 1.0 Orthophosphate_c + 1.0 Thiosulfate_c + 1.0 ADP_c
rxn01053	0.204373	1.0 NAD__c + 1.0 H2O_c + 1.0 _S__Lactaldehyde_c = 2.0 H__c + 1.0 NADH_c + 1.0 _S__Lactate_c
t_cpd00158	0.204022	1.0 Cellobiose_e = 1.0 Cellobiose_c
rxn05518	0.204022	1.0 Cellobiose_e = 1.0 Cellobiose_c
rxn00784	0.203624	1.0 2_Deoxy_D_ribose_5_phosphate_c = 1.0 D_Glyceraldehyde_3_phosphate_c + 1.0 Acetaldehyde_c
rxn03394	0.199926	1.0 2_Octaprenylphenol_c + 1.0 NADPH_c + 1.0 Oxygen_c + 1.0 H__c = 1.0 H2O_c + 1.0 2_Octaprenyl_6_hydroxyphenol_c + 1.0 NADP__c
rxn02483	0.199654	1.0 H__c + 1.0 2_Carboxy_2_5_dihydro_5_oxofuran_2_acetate_c = 1.0 CO2_c + 1.0 2_Oxo_2_3_dihydrofuran_5_acetate_c
rxn00546	0.197927	1.0 NAD__c + 1.0 D_Mannitol_1_phosphate_c = 1.0 H__c + 1.0 NADH_c + 1.0 D_Fructose_6_phosphate_c
rxn02774	0.19765	1.0 NAD__c + 1.0 Precorrin_2_c = 1.0 H__c + 1.0 Sirohydrochlorin_c + 1.0 NADH_c
rxn02287	0.19765	2.0 S_Adenosyl_L_methionine_c + 1.0 Uroporphyrinogen_III_c = 1.0 Precorrin_2_c + 2.0 H__c + 2.0 S_Adenosyl_L_homocysteine_c
t_cpd00100	0.196739	1.0 Glycerol_c = 1.0 Glycerol_e
rxn05958	0.195795	1.0 S_Ribosyl_L_homocysteine_c = 1.0 _S__4_5_dihydroxypentan_2_3_dione_c + 1.0 L_Homocysteine_c
rxn05581	0.1894	1.0 Glycerol_c = 1.0 Glycerol_e
t_cpd00137	0.189085	1.0 H2O_c + 1.0 Fe3__e + 1.0 ATP_c + 2.0 Citrate_e = 2.0 Citrate_c + 1.0 Orthophosphate_c + 1.0 Fe3__c + 1.0 ADP_c + 1.0 H__c
rxn05557	0.189085	1.0 H2O_c + 1.0 Fe3__e + 1.0 ATP_c + 2.0 Citrate_e = 2.0 Citrate_c + 1.0 Orthophosphate_c + 1.0 Fe3__c + 1.0 ADP_c + 1.0 H__c
rxn00467	0.185381	1.0 2_Oxoglutarate_c + 1.0 L_Ornithine_c = 1.0 L_Glutamate_c + 1.0 L_Glutamate_5_semialdehyde_c
rxn00262	0.184705	1.0 H2O_c + 1.0 L_Aspartate_c + 1.0 Oxygen_c = 1.0 H2O2_c + 1.0 NH3_c + 1.0 Oxaloacetate_c
rxn00569	0.181314	3.0 NADPH_c + 1.0 Nitrite_c + 5.0 H__c = 2.0 H2O_c + 1.0 NH3_c + 3.0 NADP__c
t_cpd00013	0.17871	1.0 NH3_e = 1.0 NH3_c
rxn03236	0.17599	1.0 _6R__6__L_erythro_1_2_Dihydroxypropyl__5_6_7_8_tetrahydro_4a__hydroxypterin_c = 1.0 H2O_c + 1.0 Dihydrobiopterin_c
rxn02056	0.175653	2.0 H__c + 1.0 Siroheme_c = 1.0 Sirohydrochlorin_c + 1.0 Fe2__c
rxn00265	0.171949	1.0 Citrate_c = 1.0 Acetate_c + 1.0 Oxaloacetate_c
rxn09997	0.171664	1.0 H2O_c + 1.0 Aminoimidazole_ribotide_c = 1.0 Glycolaldehyde_c + 2.0 H__c + 1.0 Orthophosphate_c + 0.5 Oxygen_c + 1.0 4_Amino_5_hydroxymethyl_2_methylpyrimidine_c
rxn09988	0.166622	2.0 H2O_c + 1.0 alpha_L_Arabinan_c = 3.0 L_Arabinose_c
rxn10210	0.166211	1.0 sn_Glycerol_3_phosphate_c + 1.0 fa6coa_c = 1.0 1_isohexadecanoyl_sn_glycerol_3_phosphate_c + 1.0 CoA_c
rxn10209	0.166211	1.0 sn_Glycerol_3_phosphate_c + 1.0 fa4coa_c = 1.0 CoA_c + 1.0 1_anteisopentadecanoyl_sn_glycerol_3_phosphate_c
rxn10208	0.166211	1.0 sn_Glycerol_3_phosphate_c + 1.0 fa3coa_c = 1.0 CoA_c + 1.0 1_isopentadecanoyl_sn_glycerol_3_phosphate_c
rxn10207	0.166211	1.0 fa1coa_c + 1.0 sn_Glycerol_3_phosphate_c = 1.0 1_isotetradecanoyl_sn_glycerol_3_phosphate_c + 1.0 CoA_c
rxn10203	0.166211	1.0 Tetradecanoyl_CoA_c + 1.0 sn_Glycerol_3_phosphate_c = 1.0 CoA_c + 1.0 1_tetradecanoyl_sn_glycerol_3_phosphate_c
rxn10202	0.166211	1.0 sn_Glycerol_3_phosphate_c + 1.0 Palmitoyl_CoA_c = 1.0 CoA_c + 1.0 1_hexadecanoyl_sn_glycerol_3_phosphate_c
rxn08552	0.166211	1.0 Oleoyl__acyl_carrier_protein__c + 1.0 sn_Glycerol_3_phosphate_c = 1.0 1_octadec_11_enoyl_sn_glycerol_3_phosphate_c + 1.0 Acyl_carrier_protein_c
rxn08551	0.166211	1.0 sn_Glycerol_3_phosphate_c + 1.0 Octadecanoyl_ACP_c = 1.0 1_octadecanoyl_sn_glycerol_3_phosphate_c + 1.0 Acyl_carrier_protein_c
rxn08550	0.166211	1.0 sn_Glycerol_3_phosphate_c + 1.0 Hexadecenoyl_ACP_c = 1.0 1_hexadec_9_enoyl_sn_glycerol_3_phosphate_c + 1.0 Acyl_carrier_protein_c
rxn08549	0.166211	1.0 sn_Glycerol_3_phosphate_c + 1.0 Palmitoyl_ACP_c = 1.0 Acyl_carrier_protein_c + 1.0 1_hexadecanoyl_sn_glycerol_3_phosphate_c
rxn08548	0.166211	1.0 sn_Glycerol_3_phosphate_c + 1.0 Tetradecenoyl_ACP_c = 1.0 1_tetradec_7_enoyl_sn_glycerol_3_phosphate_c + 1.0 Acyl_carrier_protein_c
rxn08547	0.166211	1.0 sn_Glycerol_3_phosphate_c + 1.0 Tetradecanoyl__acp__c = 1.0 Acyl_carrier_protein_c + 1.0 1_tetradecanoyl_sn_glycerol_3_phosphate_c
rxn08546	0.166211	1.0 sn_Glycerol_3_phosphate_c + 1.0 Dodecanoyl__acyl_carrier_protein__c = 1.0 Acyl_carrier_protein_c + 1.0 1_dodecanoyl_sn_glycerol_3_phosphate_c
t_cpd11574	0.166101	1.0 H2O_c + 1.0 Molybdate_e + 1.0 ATP_c = 1.0 H__c + 1.0 Orthophosphate_c + 1.0 Molybdate_c + 1.0 ADP_c
rxn05619	0.166101	1.0 H2O_c + 1.0 Molybdate_e + 1.0 ATP_c = 1.0 H__c + 1.0 Orthophosphate_c + 1.0 Molybdate_c + 1.0 ADP_c
rxn10237	0.162593	2.0 H__c + 1.0 Diisohexadecanoylphosphatidylserine_c = 1.0 CO2_c + 1.0 Diisohexadecanoylphosphatidylethanolamine_c
rxn10236	0.162593	2.0 H__c + 1.0 Dianteisopentadecanoylphosphatidylserine_c = 1.0 CO2_c + 1.0 Dianteisopentadecanoylphosphatidylethanolamine_c
rxn10235	0.162593	2.0 H__c + 1.0 Diisopentadecanoylphosphatidylserine_c = 1.0 CO2_c + 1.0 Diisopentadecanoylphosphatidylethanolamine_c
rxn10234	0.162593	2.0 H__c + 1.0 Diisotetradecanoylphosphatidylserine_c = 1.0 CO2_c + 1.0 Diisotetradecanoylphosphatidylethanolamine_c
rxn10233	0.162593	2.0 H__c + 1.0 Dianteisoheptadecanoylphosphatidylserine_c = 1.0 CO2_c + 1.0 Dianteisoheptadecanoylphosphatidylethanolamine_c
rxn10232	0.162593	1.0 Diisoheptadecanoylphosphatidylserine_c + 2.0 H__c = 1.0 Diisoheptadecanoylphosphatidylethanolamine_c + 1.0 CO2_c
rxn10231	0.162593	1.0 CDP_1_2_diisohexadecanoylglycerol_c + 1.0 L_Serine_c = 1.0 H__c + 1.0 Diisohexadecanoylphosphatidylserine_c + 1.0 CMP_c
rxn10230	0.162593	1.0 CDP_1_2_dianteisopentadecanoylglycerol_c + 1.0 L_Serine_c = 1.0 H__c + 1.0 Dianteisopentadecanoylphosphatidylserine_c + 1.0 CMP_c
rxn10229	0.162593	1.0 L_Serine_c + 1.0 CDP_1_2_diisopentadecanoylglycerol_c = 1.0 H__c + 1.0 Diisopentadecanoylphosphatidylserine_c + 1.0 CMP_c
rxn10228	0.162593	1.0 CDP_1_2_diisotetradecanoylglycerol_c + 1.0 L_Serine_c = 1.0 H__c + 1.0 Diisotetradecanoylphosphatidylserine_c + 1.0 CMP_c
rxn10227	0.162593	1.0 CDP_1_2_dianteisoheptadecanoylglycerol_c + 1.0 L_Serine_c = 1.0 H__c + 1.0 Dianteisoheptadecanoylphosphatidylserine_c + 1.0 CMP_c
rxn10226	0.162593	1.0 CDP_1_2_diisoheptadecanoylglycerol_c + 1.0 L_Serine_c = 1.0 Diisoheptadecanoylphosphatidylserine_c + 1.0 H__c + 1.0 CMP_c
rxn09211	0.162593	1.0 CDP_1_2_dioctadec_11_enoylglycerol_c + 1.0 L_Serine_c = 1.0 H__c + 1.0 phosphatidylserine_dioctadec_11_enoyl_c + 1.0 CMP_c
rxn09210	0.162593	1.0 CDP_1_2_dioctadecanoylglycerol_c + 1.0 L_Serine_c = 1.0 H__c + 1.0 phosphatidylserine_dioctadecanoyl_c + 1.0 CMP_c
rxn09209	0.162593	1.0 CDP_1_2_dihexadec_9_enoylglycerol_c + 1.0 L_Serine_c = 1.0 H__c + 1.0 phosphatidylserine_dihexadec_9_enoyl_c + 1.0 CMP_c
rxn09208	0.162593	1.0 CDP_1_2_dihexadecanoylglycerol_c + 1.0 L_Serine_c = 1.0 H__c + 1.0 CMP_c + 1.0 phosphatidylserine_dihexadecanoyl_c
rxn09207	0.162593	1.0 CDP_1_2_ditetradec_7_enoylglycerol_c + 1.0 L_Serine_c = 1.0 H__c + 1.0 phosphatidylserine_ditetradec_7_enoyl_c + 1.0 CMP_c
rxn09206	0.162593	1.0 L_Serine_c + 1.0 CDP_1_2_ditetradecanoylglycerol_c = 1.0 H__c + 1.0 phosphatidylserine_ditetradecanoyl_c + 1.0 CMP_c
rxn09205	0.162593	1.0 CDP_1_2_didodecanoylglycerol_c + 1.0 L_Serine_c = 1.0 H__c + 1.0 phosphatidylserine_didodecanoyl_c + 1.0 CMP_c
rxn09203	0.162593	2.0 H__c + 1.0 phosphatidylserine_dioctadec_11_enoyl_c = 1.0 CO2_c + 1.0 phosphatidylethanolamine_dioctadec_11_enoyl_c
rxn09202	0.162593	2.0 H__c + 1.0 phosphatidylserine_dioctadecanoyl_c = 1.0 CO2_c + 1.0 phosphatidylethanolamine_dioctadecanoyl_c
rxn09201	0.162593	2.0 H__c + 1.0 phosphatidylserine_dihexadec_9_enoyl_c = 1.0 CO2_c + 1.0 phosphatidylethanolamine_dihexadec_9enoyl_c
rxn09200	0.162593	2.0 H__c + 1.0 phosphatidylserine_dihexadecanoyl_c = 1.0 CO2_c + 1.0 phosphatidylethanolamine_dihexadecanoyl_c
rxn09199	0.162593	2.0 H__c + 1.0 phosphatidylserine_ditetradec_7_enoyl_c = 1.0 CO2_c + 1.0 phosphatidylethanolamine_ditetradec_7_enoyl_c
rxn09198	0.162593	2.0 H__c + 1.0 phosphatidylserine_ditetradecanoyl_c = 1.0 CO2_c + 1.0 phosphatidylethanolamine_ditetradecanoyl_c
rxn09197	0.162593	2.0 H__c + 1.0 phosphatidylserine_didodecanoyl_c = 1.0 phosphatidylethanolamine_didodecanoyl_c + 1.0 CO2_c
rxn00985	0.160644	1.0 Propanoate_c + 1.0 ATP_c + 1.0 H__c = 1.0 Propanoyl_phosphate_c + 1.0 ADP_c
rxn00225	0.160644	1.0 H__c + 1.0 ATP_c + 1.0 Acetate_c = 1.0 Acetyl_phosphate_c + 1.0 ADP_c
rxn00988	0.160305	1.0 H__c + 1.0 Acetoacetate_c + 1.0 CoA_c + 1.0 ATP_c = 1.0 Diphosphate_c + 1.0 AMP_c + 1.0 Acetoacetyl_CoA_c
rxn01044	0.158119	1.0 D_Xylose_c = 1.0 D_Xylulose_c
rxn00250	0.15769	1.0 Pyruvate_c + 1.0 HCO3__c + 1.0 ATP_c = 1.0 H__c + 1.0 Orthophosphate_c + 1.0 ADP_c + 1.0 Oxaloacetate_c
rxn00194	0.157659	1.0 H__c + 1.0 L_Glutamate_c = 1.0 CO2_c + 1.0 4_Aminobutanoate_c
rxn04783	0.156349	1.0 5__Phosphoribosylglycinamide_c + 1.0 Formate_c + 1.0 ATP_c = 1.0 5__Phosphoribosyl_N_formylglycinamide_c + 1.0 H__c + 1.0 Orthophosphate_c + 1.0 ADP_c
rxn00938	0.156064	1.0 Nicotinamide_c + 1.0 H2O_c = 1.0 Nicotinate_c + 1.0 NH3_c
rxn00139	0.15524	1.0 5_Phospho_alpha_D_ribose_1_diphosphate_c + 1.0 Adenine_c = 1.0 Diphosphate_c + 1.0 AMP_c
rxn00134	0.154868	1.0 ATP_c + 1.0 Adenosine_c = 1.0 AMP_c + 1.0 ADP_c
rxn08557	0.154754	1.0 sn_Glycerol_3_phosphate_c + 1.0 Menaquinone_8_c = 1.0 Glycerone_phosphate_c + 1.0 Menaquinol_8_c
rxn10204	0.153512	1.0 sn_Glycerol_3_phosphate_c + 1.0 Stearoyl_CoA_c = 1.0 1_octadecanoyl_sn_glycerol_3_phosphate_c + 1.0 CoA_c
rxn06777	0.15289	1.0 NAD__c + 1.0 _S__3_Hydroxytetradecanoyl_CoA_c = 1.0 H__c + 1.0 NADH_c + 1.0 3_Oxotetradecanoyl_CoA_c
rxn06510	0.15289	1.0 Acetyl_CoA_c + 1.0 Lauroyl_CoA_c = 1.0 CoA_c + 1.0 3_Oxotetradecanoyl_CoA_c
rxn05236	0.15289	1.0 UTP_c + 1.0 trdrd_c = 1.0 H2O_c + 1.0 trdox_c + 1.0 dUTP_c
rxn04750	0.15289	1.0 NAD__c + 1.0 _3S__3_Hydroxyadipyl_CoA_c = 1.0 3_Oxoadipyl_CoA_c + 1.0 H__c + 1.0 NADH_c
rxn03250	0.15289	1.0 _S__Hydroxyhexanoyl_CoA_c = 1.0 H2O_c + 1.0 trans_Hex_2_enoyl_CoA_c
rxn03249	0.15289	1.0 _S__Hydroxyhexanoyl_CoA_c + 1.0 NAD__c = 1.0 H__c + 1.0 3_Oxohexanoyl_CoA_c + 1.0 NADH_c
rxn03248	0.15289	1.0 Acetyl_CoA_c + 1.0 Hexanoyl_CoA_c = 1.0 3_Oxooctanoyl_CoA_c + 1.0 CoA_c
rxn03247	0.15289	1.0 _S__Hydroxyoctanoyl_CoA_c = 1.0 H2O_c + 1.0 trans_Oct_2_enoyl_CoA_c
rxn03246	0.15289	1.0 NAD__c + 1.0 _S__Hydroxyoctanoyl_CoA_c = 1.0 3_Oxooctanoyl_CoA_c + 1.0 H__c + 1.0 NADH_c
rxn03245	0.15289	1.0 _S__Hydroxydecanoyl_CoA_c = 1.0 H2O_c + 1.0 trans_Dec_2_enoyl_CoA_c
rxn03244	0.15289	1.0 NAD__c + 1.0 _S__Hydroxydecanoyl_CoA_c = 1.0 H__c + 1.0 3_Oxodecanoyl_CoA_c + 1.0 NADH_c
rxn03243	0.15289	1.0 Decanoyl_CoA_c + 1.0 Acetyl_CoA_c = 1.0 3_Oxododecanoyl_CoA_c + 1.0 CoA_c
rxn03242	0.15289	1.0 NAD__c + 1.0 _S__3_Hydroxydodecanoyl_CoA_c = 1.0 H__c + 1.0 NADH_c + 1.0 3_Oxododecanoyl_CoA_c
rxn03241	0.15289	1.0 _S__3_Hydroxytetradecanoyl_CoA_c = 1.0 trans_Tetradec_2_enoyl_CoA_c + 1.0 H2O_c
rxn03240	0.15289	1.0 _S__3_Hydroxyhexadecanoyl_CoA_c = 1.0 H2O_c + 1.0 trans_Hexadec_2_enoyl_CoA_c
rxn03239	0.15289	1.0 NAD__c + 1.0 _S__3_Hydroxyhexadecanoyl_CoA_c = 1.0 H__c + 1.0 NADH_c + 1.0 3_Oxopalmitoyl_CoA_c
rxn02949	0.15289	1.0 2_Methylprop_2_enoyl_CoA_c + 1.0 H2O_c = 1.0 _S__3_Hydroxyisobutyryl_CoA_c
rxn02934	0.15289	1.0 _2S_3S__3_Hydroxy_2_methylbutanoyl_CoA_c = 1.0 H2O_c + 1.0 2_Methylbut_2_enoyl_CoA_c
rxn02933	0.15289	1.0 NAD__c + 1.0 _2S_3S__3_Hydroxy_2_methylbutanoyl_CoA_c = 1.0 H__c + 1.0 NADH_c + 1.0 2_Methylacetoacetyl_CoA_c
rxn02911	0.15289	1.0 _S__3_Hydroxydodecanoyl_CoA_c = 1.0 H2O_c + 1.0 2_trans_Dodecenoyl_CoA_c
rxn02804	0.15289	1.0 Tetradecanoyl_CoA_c + 1.0 Acetyl_CoA_c = 1.0 CoA_c + 1.0 3_Oxopalmitoyl_CoA_c
rxn02680	0.15289	1.0 Octanoyl_CoA_c + 1.0 Acetyl_CoA_c = 1.0 3_Oxodecanoyl_CoA_c + 1.0 CoA_c
rxn02167	0.15289	1.0 _S__3_Hydroxybutanoyl_CoA_c = 1.0 H2O_c + 1.0 Crotonoyl_CoA_c
rxn01480	0.15289	1.0 NAD__c + 1.0 3_Hydroxy_2_methylpropanoate_c = 1.0 2_Methyl_3_oxopropanoate_c + 1.0 H__c + 1.0 NADH_c
rxn00874	0.15289	1.0 Acetyl_CoA_c + 1.0 Butanoyl_CoA_c = 1.0 3_Oxohexanoyl_CoA_c + 1.0 CoA_c
rxn00676	0.15289	1.0 Propanoyl_CoA_c + 1.0 Acetyl_CoA_c = 1.0 2_Methylacetoacetyl_CoA_c + 1.0 CoA_c
t_cpd00051	0.150693	1.0 L_Arginine_e + 1.0 L_Ornithine_c = 1.0 L_Ornithine_e + 1.0 L_Arginine_c
rxn10131	0.150693	1.0 L_Arginine_e + 1.0 L_Ornithine_c = 1.0 L_Ornithine_e + 1.0 L_Arginine_c
rxn00214	0.147701	1.0 UDP_glucose_c = 1.0 UDP_D_galactose_c
rxn00102	0.147701	1.0 H__c + 1.0 HCO3__c = 1.0 H2O_c + 1.0 CO2_c
rxn01114	0.147429	1.0 ATP_c + 1.0 D_Ribulose_c = 1.0 D_Ribulose_5_phosphate_c + 1.0 ADP_c
rxn00584	0.144725	1.0 NAD__c + 1.0 1_6_Dihydroxy_cis_2_4_cyclohexadiene_1_carboxylic_acid_c = 1.0 NADH_c + 1.0 CO2_c + 1.0 Catechol_c
rxn04143	0.14426	1.0 NAD__c + 1.0 _R_R__Tartaric_acid_c = 1.0 2_Hydroxy_3_oxosuccinate_c + 1.0 H__c + 1.0 NADH_c
rxn01847	0.14426	1.0 NAD__c + 1.0 meso_Tartaric_acid_c = 1.0 2_Hydroxy_3_oxosuccinate_c + 1.0 H__c + 1.0 NADH_c
rxn01285	0.14426	1.0 H__c + 1.0 _R_R__Tartaric_acid_c = 1.0 D_Glycerate_c + 1.0 CO2_c
rxn00160	0.14426	1.0 NAD__c + 1.0 _R__Malate_c = 1.0 Pyruvate_c + 1.0 CO2_c + 1.0 NADH_c
rxn01518	0.14414	1.0 Deoxyuridine_c + 1.0 ATP_c = 1.0 ADP_c + 1.0 dUMP_c
rxn10168	0.142844	1.0 H2O_c + 1.0 Potassium_e + 1.0 ATP_c = 1.0 H__c + 1.0 Orthophosphate_c + 1.0 Potassium_c + 1.0 ADP_c
rxn00361	0.14212	1.0 Adenylyl_sulfate_c + 1.0 ATP_c = 1.0 3__Phosphoadenylyl_sulfate_c + 1.0 ADP_c
t_cpd00053	0.142065	1.0 H2O_c + 1.0 L_Glutamine_e + 1.0 ATP_c = 1.0 L_Glutamine_c + 1.0 H__c + 1.0 Orthophosphate_c + 1.0 ADP_c
rxn05155	0.142065	1.0 H2O_c + 1.0 L_Glutamine_e + 1.0 ATP_c = 1.0 L_Glutamine_c + 1.0 H__c + 1.0 Orthophosphate_c + 1.0 ADP_c
rxn00416	0.141433	1.0 L_Glutamine_c + 1.0 H2O_c + 1.0 L_Aspartate_c + 1.0 ATP_c = 1.0 L_Glutamate_c + 1.0 Diphosphate_c + 1.0 L_Asparagine_c + 1.0 AMP_c
rxn01893	0.141421	1.0 H2O_c + 1.0 2_Hydroxy_2_4_pentadienoate_c = 1.0 4_Hydroxy_2_oxopentanoate_c
rxn00740	0.141355	1.0 H2O_c + 1.0 O_Succinyl_L_homoserine_c = 1.0 Succinate_c + 1.0 H__c + 1.0 NH3_c + 1.0 2_Oxobutanoate_c
rxn05235	0.139151	1.0 CTP_c + 1.0 trdrd_c = 1.0 H2O_c + 1.0 trdox_c + 1.0 dCTP_c
rxn05234	0.139151	1.0 GTP_c + 1.0 trdrd_c = 1.0 H2O_c + 1.0 dGTP_c + 1.0 trdox_c
rxn05232	0.139151	1.0 trdrd_c + 1.0 ATP_c = 1.0 dATP_c + 1.0 H2O_c + 1.0 trdox_c
rxn08180	0.138287	1.0 Dethiobiotin_c + 1.0 S_Adenosyl_L_methionine_c + 1.0 Sulfur_c = 1.0 Biotin_c + 1.0 5__Deoxyadenosine_c + 1.0 L_Methionine_c + 1.0 H__c
rxn05063	0.137651	1.0 H2O_c + 1.0 Cyanate_c = 1.0 Carbamate_c
rxn01451	0.137085	1.0 NAD__c + 1.0 _S__3_Hydroxybutanoyl_CoA_c = 1.0 H__c + 1.0 NADH_c + 1.0 Acetoacetyl_CoA_c
rxn08901	0.13676	1.0 Menaquinone_8_c + 1.0 _S__Malate_c = 1.0 Oxaloacetate_c + 1.0 Menaquinol_8_c
rxn08900	0.13676	1.0 _S__Malate_c + 1.0 Ubiquinone_8_c = 1.0 Oxaloacetate_c + 1.0 Ubiquinol_8_c
rxn00935	0.13676	1.0 _S__Malate_c + 1.0 FAD_c = 1.0 FADH2_c + 1.0 Oxaloacetate_c
rxn07295	0.136559	1.0 Glycine_c = 3.0 H__c + 1.0 Iminoglycine_c
rxn00727	0.135907	1.0 L_Glutamine_c + 1.0 Chorismate_c = 1.0 Pyruvate_c + 1.0 H__c + 1.0 L_Glutamate_c + 1.0 Anthranilate_c
t_cpd01242	0.135415	1.0 H2O_c + 1.0 ATP_c + 1.0 Deoxyribose_e = 1.0 Deoxyribose_c + 1.0 H__c + 1.0 Orthophosphate_c + 1.0 ADP_c
t_cpd00105	0.135415	1.0 H2O_c + 1.0 ATP_c + 1.0 D_Ribose_e = 1.0 D_Ribose_c + 1.0 Orthophosphate_c + 1.0 ADP_c + 1.0 H__c
rxn05549	0.135415	1.0 H2O_c + 1.0 ATP_c + 1.0 Deoxyribose_e = 1.0 Deoxyribose_c + 1.0 H__c + 1.0 Orthophosphate_c + 1.0 ADP_c
rxn05160	0.135415	1.0 H2O_c + 1.0 ATP_c + 1.0 D_Ribose_e = 1.0 D_Ribose_c + 1.0 Orthophosphate_c + 1.0 ADP_c + 1.0 H__c
t_cpd00393	0.13457	1.0 Folate_e + 1.0 H__e = 1.0 H__c + 1.0 Folate_c
rxn04082	0.133971	1.0 L_Ribulose_5_phosphate_c = 1.0 D_Xylulose_5_phosphate_c
rxn01763	0.133971	1.0 L_Ribulose_c + 1.0 ATP_c = 1.0 L_Ribulose_5_phosphate_c + 1.0 ADP_c
rxn01103	0.133903	1.0 H2O_c + 1.0 3_Phospho_D_glyceroyl_phosphate_c = 2.0 H__c + 1.0 Orthophosphate_c + 1.0 3_Phospho_D_glycerate_c
rxn00227	0.133903	1.0 H2O_c + 1.0 Acetyl_phosphate_c = 2.0 H__c + 1.0 Orthophosphate_c + 1.0 Acetate_c
rxn00742	0.129998	1.0 H2O_c + 1.0 Cystathionine_c = 1.0 NH3_c + 1.0 2_Oxobutanoate_c + 1.0 L_Cysteine_c
rxn00566	0.129998	1.0 H2O_c + 1.0 L_Cysteine_c = 1.0 Pyruvate_c + 1.0 Hydrogen_sulfide_c + 1.0 NH3_c
rxn03061	0.128732	1.0 _2S_3R__3_Hydroxybutane_1_2_3_tricarboxylate_c = 1.0 H2O_c + 1.0 _Z__But_2_ene_1_2_3_tricarboxylate_c
rxn05223	0.128576	1.0 H2O_c + 1.0 ATP_c + 1.0 Biotin_e = 1.0 Biotin_c + 1.0 Orthophosphate_c + 1.0 ADP_c + 1.0 H__c
t_cpd00104	0.128576	1.0 H2O_c + 1.0 ATP_c + 1.0 Biotin_e = 1.0 Biotin_c + 1.0 Orthophosphate_c + 1.0 ADP_c + 1.0 H__c
rxn01506	0.127832	1.0 N_Acetyl_D_glucosamine_6_phosphate_c = 1.0 N_Acetyl_D_mannosamine_6_phosphate_c
rxn01274	0.126865	1.0 H2O_c + 1.0 _R__S_Lactoylglutathione_c = 1.0 H__c + 1.0 Glutathione_c + 1.0 _R__Lactate_c
rxn00629	0.12671	1.0 NAD__c + 1.0 Mannitol_c = 1.0 H__c + 1.0 NADH_c + 1.0 D_Fructose_c
rxn10119	0.125581	1.0 Hydrogen_c + 2.0 H__c + 1.0 Menaquinone_8_c = 1.0 Menaquinol_8_c + 2.0 H__e
rxn10117	0.125581	1.0 Hydrogen_c + 2.0 H__c + 1.0 2_Demethylmenaquinone_8_c = 1.0 2_Demethylmenaquinol_8_c + 2.0 H__e
rxn00223	0.125087	1.0 D_Glucose_c = 1.0 D_Fructose_c
rxn00248	0.124243	1.0 NAD__c + 1.0 _S__Malate_c = 1.0 H__c + 1.0 NADH_c + 1.0 Oxaloacetate_c
rxn00433	0.123854	1.0 H2O_c + 1.0 Oxygen_c + 1.0 Sarcosine_c = 1.0 Formaldehyde_c + 1.0 H2O2_c + 1.0 Glycine_c
rxn01204	0.122786	1.0 2_Oxoglutarate_c + 1.0 4_Aminobutanoate_c = 1.0 L_Glutamate_c + 1.0 Succinate_semialdehyde_c
rxn04603	0.121898	1.0 trans_2_3_Dihydroxycinnamate_c + 1.0 Oxygen_c = 1.0 2_Hydroxy_6_ketononatrienedioate_c + 1.0 H__c
rxn03038	0.121898	1.0 3__2_3_Dihydroxyphenyl_propanoate_c + 1.0 Oxygen_c = 1.0 2_Hydroxy_6_oxonona_2_4_diene_1_9_dioate_c + 1.0 H__c
rxn01093	0.121566	1.0 H__c + 1.0 2_3_Dihydroxybenzoate_c + 1.0 ATP_c = 1.0 _2_3_Dihydroxybenzoyl_adenylate_c + 1.0 Diphosphate_c
rxn08558	0.119314	1.0 sn_Glycerol_3_phosphate_c + 1.0 2_Demethylmenaquinone_8_c = 1.0 Glycerone_phosphate_c + 1.0 2_Demethylmenaquinol_8_c
rxn01192	0.118107	1.0 3_4_Dihydroxybenzoate_c + 1.0 Oxygen_c = 2.0 H__c + 1.0 3_Carboxy_cis_cis_muconate_c
rxn05654	0.118097	1.0 Succinate_e + 1.0 H__e = 1.0 Succinate_c + 1.0 H__c
rxn05561	0.118097	1.0 Fumarate_e + 1.0 H__e = 1.0 H__c + 1.0 Fumarate_c
rxn10067	0.117824	1.0 flavin_mononucleotide_reduced_c + 1.0 hexanesulfonate_c + 1.0 Oxygen_c = 1.0 Sulfite_c + 1.0 H2O_c + 1.0 FMN_c + 1.0 hexanal_c
rxn08471	0.117824	1.0 flavin_mononucleotide_reduced_c + 1.0 Oxygen_c + 1.0 Sulfoacetate_c = 1.0 Sulfite_c + 1.0 H2O_c + 1.0 FMN_c + 1.0 Glyoxylate_c
rxn08470	0.117824	1.0 flavin_mononucleotide_reduced_c + 1.0 Oxygen_c + 1.0 butanesulfonate_c = 1.0 Butanal_c + 1.0 Sulfite_c + 1.0 H2O_c + 1.0 FMN_c
rxn08469	0.117824	1.0 flavin_mononucleotide_reduced_c + 1.0 ethanesulfonate_c + 1.0 Oxygen_c = 1.0 Sulfite_c + 1.0 H2O_c + 1.0 FMN_c + 1.0 Acetaldehyde_c
rxn08468	0.117824	1.0 flavin_mononucleotide_reduced_c + 1.0 Methanesulfonic_acid_c + 1.0 Oxygen_c = 1.0 Formaldehyde_c + 1.0 Sulfite_c + 1.0 H2O_c + 1.0 FMN_c
rxn08467	0.117824	1.0 flavin_mononucleotide_reduced_c + 1.0 2_Hydroxyethanesulfonate_c + 1.0 Oxygen_c = 1.0 Glycolaldehyde_c + 1.0 Sulfite_c + 1.0 H2O_c + 1.0 FMN_c
rxn05737	0.117824	1.0 flavin_mononucleotide_reduced_c + 1.0 Taurine_c + 1.0 Oxygen_c = 1.0 Sulfite_c + 1.0 H2O_c + 1.0 FMN_c + 1.0 Aminoacetaldehyde_c
rxn05625	0.117296	1.0 Nitrite_e + 1.0 H__e = 1.0 H__c + 1.0 Nitrite_c
rxn00269	0.116962	1.0 H2O_c + 1.0 Oxygen_c + 1.0 Glycine_c = 1.0 H2O2_c + 1.0 NH3_c + 1.0 Glyoxylate_c
rxn02369	0.116801	1.0 2_Carboxy_2_5_dihydro_5_oxofuran_2_acetate_c = 1.0 H__c + 1.0 3_Carboxy_cis_cis_muconate_c
rxn05166	0.113118	1.0 Cobalt_e + 1.0 H2O_c + 1.0 ATP_c = 1.0 H__c + 1.0 Orthophosphate_c + 1.0 ADP_c + 1.0 Cobalt_c
rxn06078	0.110666	1.0 O_Acetyl_L_homoserine_c + 1.0 Thiosulfate_c + 1.0 trdrd_c = 1.0 Sulfite_c + 1.0 trdox_c + 1.0 L_Homocysteine_c + 1.0 Acetate_c
rxn08291	0.110415	1.0 D_Alanine_c + 1.0 H2O_c + 1.0 FAD_c = 1.0 Pyruvate_c + 1.0 FADH2_c + 1.0 NH3_c
rxn06377	0.11032	1.0 H__c + 1.0 Glycine_c + 1.0 Lipoylprotein_c = 1.0 S_Aminomethyldihydrolipoylprotein_c + 1.0 CO2_c
rxn00867	0.110118	1.0 L_Histidine_c = 1.0 Urocanate_c + 1.0 NH3_c
t_cpd00653	0.109703	1.0 H__e + 1.0 D_Galactonate_e = 1.0 H__c + 1.0 D_Galactonate_c
rxn10160	0.109703	1.0 H__e + 1.0 D_Galactonate_e = 1.0 H__c + 1.0 D_Galactonate_c
rxn01022	0.109605	1.0 H__c + 1.0 Orthophosphate_c + 1.0 5__Methylthioadenosine_c = 1.0 Adenine_c + 1.0 S_Methyl_5_thio_D_ribose_1_phosphate_c
rxn01816	0.109476	1.0 Succinate_c + 1.0 H__c + 1.0 Cystathionine_c = 1.0 L_Cysteine_c + 1.0 O_Succinyl_L_homoserine_c
t_cpd11596	0.108445	1.0 butanesulfonate_e + 1.0 H2O_c + 1.0 ATP_c = 1.0 H__c + 1.0 Orthophosphate_c + 1.0 ADP_c + 1.0 butanesulfonate_c
t_cpd11579	0.108445	1.0 H2O_c + 1.0 ethanesulfonate_e + 1.0 ATP_c = 1.0 H__c + 1.0 Orthophosphate_c + 1.0 ethanesulfonate_c + 1.0 ADP_c
t_cpd11578	0.108445	1.0 H2O_c + 1.0 hexanesulfonate_e + 1.0 ATP_c = 1.0 H__c + 1.0 Orthophosphate_c + 1.0 hexanesulfonate_c + 1.0 ADP_c
t_cpd11575	0.108445	1.0 MOPS_e + 1.0 H2O_c + 1.0 ATP_c = 1.0 H__c + 1.0 Orthophosphate_c + 1.0 ADP_c + 1.0 MOPS_c
t_cpd09878	0.108445	1.0 Sulfoacetate_e + 1.0 H2O_c + 1.0 ATP_c = 1.0 H__c + 1.0 Orthophosphate_c + 1.0 ADP_c + 1.0 Sulfoacetate_c
t_cpd08023	0.108445	1.0 H2O_c + 1.0 Methanesulfonic_acid_e + 1.0 ATP_c = 1.0 H__c + 1.0 Orthophosphate_c + 1.0 Methanesulfonic_acid_c + 1.0 ADP_c
t_cpd03048	0.108445	1.0 H2O_c + 1.0 2_Hydroxyethanesulfonate_e + 1.0 ATP_c = 1.0 H__c + 1.0 Orthophosphate_c + 1.0 2_Hydroxyethanesulfonate_c + 1.0 ADP_c
t_cpd00395	0.108445	1.0 L_Cysteate_e + 1.0 H2O_c + 1.0 ATP_c = 1.0 H__c + 1.0 Orthophosphate_c + 1.0 ADP_c + 1.0 L_Cysteate_c
rxn05656	0.108445	1.0 Sulfoacetate_e + 1.0 H2O_c + 1.0 ATP_c = 1.0 H__c + 1.0 Orthophosphate_c + 1.0 ADP_c + 1.0 Sulfoacetate_c
rxn05621	0.108445	1.0 H2O_c + 1.0 Methanesulfonic_acid_e + 1.0 ATP_c = 1.0 H__c + 1.0 Orthophosphate_c + 1.0 Methanesulfonic_acid_c + 1.0 ADP_c
rxn05620	0.108445	1.0 MOPS_e + 1.0 H2O_c + 1.0 ATP_c = 1.0 H__c + 1.0 Orthophosphate_c + 1.0 ADP_c + 1.0 MOPS_c
rxn05599	0.108445	1.0 L_Cysteate_e + 1.0 H2O_c + 1.0 ATP_c = 1.0 H__c + 1.0 Orthophosphate_c + 1.0 ADP_c + 1.0 L_Cysteate_c
rxn05594	0.108445	1.0 H2O_c + 1.0 2_Hydroxyethanesulfonate_e + 1.0 ATP_c = 1.0 H__c + 1.0 Orthophosphate_c + 1.0 2_Hydroxyethanesulfonate_c + 1.0 ADP_c
rxn05585	0.108445	1.0 H2O_c + 1.0 hexanesulfonate_e + 1.0 ATP_c = 1.0 H__c + 1.0 Orthophosphate_c + 1.0 hexanesulfonate_c + 1.0 ADP_c
rxn05552	0.108445	1.0 H2O_c + 1.0 ethanesulfonate_e + 1.0 ATP_c = 1.0 H__c + 1.0 Orthophosphate_c + 1.0 ethanesulfonate_c + 1.0 ADP_c
rxn05512	0.108445	1.0 butanesulfonate_e + 1.0 H2O_c + 1.0 ATP_c = 1.0 H__c + 1.0 Orthophosphate_c + 1.0 ADP_c + 1.0 butanesulfonate_c
rxn05644	0.108036	1.0 D_Ribose_c + 1.0 H2O_c + 1.0 ATP_c = 1.0 H__c + 1.0 Orthophosphate_c + 1.0 ADP_c + 1.0 D_Ribose_e
rxn02363	0.107978	1.0 H__c + 1.0 3_Hydroxyphenylacetate_c + 1.0 NADH_c + 1.0 Oxygen_c = 1.0 3_4_Dihydroxyphenylacetate_c + 1.0 NAD__c + 1.0 H2O_c
rxn01945	0.107978	1.0 H__c + 1.0 NADH_c + 1.0 Oxygen_c + 1.0 4_Hydroxyphenylacetate_c = 1.0 3_4_Dihydroxyphenylacetate_c + 1.0 NAD__c + 1.0 H2O_c
rxn03898	0.107845	1.0 H__c + 1.0 NADPH_c + 1.0 Benzoate_c + 1.0 Oxygen_c = 1.0 1_6_Dihydroxy_cis_2_4_cyclohexadiene_1_carboxylic_acid_c + 1.0 NADP__c
rxn03897	0.107845	1.0 H__c + 1.0 NADH_c + 1.0 Oxygen_c + 1.0 Benzoate_c = 1.0 NAD__c + 1.0 1_6_Dihydroxy_cis_2_4_cyclohexadiene_1_carboxylic_acid_c
rxn02782	0.107662	1.0 2_5_Dihydro_5_oxofuran_2_acetate_c = 1.0 H__c + 1.0 cis_cis_Muconate_c
rxn05177	0.106947	1.0 H2O_c + 1.0 Thiamine_e + 1.0 ATP_c = 1.0 H__c + 1.0 Orthophosphate_c + 1.0 Thiamine_c + 1.0 ADP_c
rxn00540	0.106295	1.0 Pyruvate_c + 1.0 Acetaldehyde_c = 1.0 4_Hydroxy_2_oxopentanoate_c
rxn02897	0.105306	1.0 Nicotinate_D_ribonucleotide_c + 1.0 Dimethylbenzimidazole_c = 1.0 Nicotinate_c + 1.0 N1__5_Phospho_alpha_D_ribosyl__5_6_dimethylbenzimidazole_c + 1.0 H__c
rxn02345	0.101954	1.0 _S__3_Hydroxybutanoyl_CoA_c = 1.0 _R__3_Hydroxybutanoyl_CoA_c
rxn01406	0.101297	1.0 S_Adenosylmethioninamine_c + 1.0 Putrescine_c = 1.0 H__c + 1.0 Spermidine_c + 1.0 5__Methylthioadenosine_c
rxn00175	0.101236	1.0 H__c + 1.0 CoA_c + 1.0 ATP_c + 1.0 Acetate_c = 1.0 Diphosphate_c + 1.0 Acetyl_CoA_c + 1.0 AMP_c
rxn01454	0.100689	1.0 H2O_c + 1.0 Acetyl_CoA_c + 1.0 Acetoacetyl_CoA_c = 1.0 H__c + 1.0 CoA_c + 1.0 _S__3_Hydroxy_3_methylglutaryl_CoA_c
rxn05031	0.100463	1.0 Prephytoene_diphosphate_c = 1.0 Diphosphate_c + 1.0 Phytoene_c
rxn02945	0.100463	1.0 Prephytoene_diphosphate_c = 1.0 15_cis_Phytoene_c + 1.0 Diphosphate_c
rxn01489	0.100463	2.0 Geranylgeranyl_diphosphate_c = 1.0 Prephytoene_diphosphate_c + 1.0 Diphosphate_c
rxn00289	0.100377	1.0 _2S_3R__3_Hydroxybutane_1_2_3_tricarboxylate_c = 1.0 Pyruvate_c + 1.0 Succinate_c
rxn03052	0.100055	1.0 5_Methyltetrahydropteroyltri_L_glutamate_c + 1.0 L_Homocysteine_c = 1.0 Tetrahydropteroyltri_L_glutamate_c + 1.0 L_Methionine_c
rxn00347	0.0985651	1.0 L_Aspartate_c = 1.0 Fumarate_c + 1.0 NH3_c
rxn10121	0.0985524	2.0 H__c + 1.0 Nitrate_c + 1.0 Menaquinol_8_c = 1.0 H2O_c + 1.0 Nitrite_c + 1.0 Menaquinone_8_c + 2.0 H__e
rxn10474	0.0981623	1.0 Cobalt_e = 1.0 Cobalt_c
rxn00395	0.0942033	1.0 H2O_c + 1.0 L_Arginine_c = 1.0 L_Citrulline_c + 1.0 NH3_c
rxn02889	0.0938982	1.0 HCO3__c + 1.0 ATP_c + 1.0 3_Methylcrotonyl_CoA_c = 1.0 3_Methylglutaconyl_CoA_c + 1.0 Orthophosphate_c + 1.0 ADP_c + 1.0 H__c
t_cpd00036	0.0938967	1.0 Succinate_e + 1.0 H__e = 1.0 Succinate_c + 1.0 H__c
rxn00340	0.0937496	1.0 L_Aspartate_c + 1.0 ATP_c + 1.0 NH3_c = 1.0 Diphosphate_c + 1.0 AMP_c + 1.0 L_Asparagine_c
rxn00333	0.0934837	1.0 Glycolate_c + 1.0 Oxygen_c = 1.0 H2O2_c + 1.0 Glyoxylate_c
rxn05305	0.0934532	1.0 L_Lysine_c + 1.0 H__e = 1.0 H__c + 1.0 L_Lysine_e
rxn05937	0.0925224	1.0 H__c + 1.0 Reduced_ferredoxin_c + 1.0 NADP__c = 1.0 NADPH_c + 1.0 Oxidized_ferredoxin_c
rxn02270	0.0920983	1.0 2_Methylbutanoyl_CoA_c + 1.0 FAD_c = 1.0 FADH2_c + 1.0 2_Methylbut_2_enoyl_CoA_c
rxn00980	0.0920556	1.0 2_Phosphoglycolate_c + 1.0 H2O_c = 1.0 Glycolate_c + 1.0 Orthophosphate_c + 1.0 H__c
rxn05433	0.0918397	1.0 4_methyl_trans_hex_2_enoyl_ACP_c + 1.0 NADH_c + 1.0 H__c = 1.0 NAD__c + 1.0 4_methyl_hexanoyl_ACP_c
t_cpd00210	0.0917811	1.0 H2O_c + 1.0 Taurine_e + 1.0 ATP_c = 1.0 H__c + 1.0 Orthophosphate_c + 1.0 Taurine_c + 1.0 ADP_c
rxn05172	0.0917811	1.0 H2O_c + 1.0 Taurine_e + 1.0 ATP_c = 1.0 H__c + 1.0 Orthophosphate_c + 1.0 Taurine_c + 1.0 ADP_c
rxn10114	0.0913134	3.0 H__c + 1.0 Formate_c + 1.0 Ubiquinone_8_c = 1.0 CO2_c + 1.0 Ubiquinol_8_c + 2.0 H__e
rxn03991	0.0898004	1.0 NADPH_c + 2.0 Oxygen_c + 2.0 Nitric_oxide_c = 1.0 H__c + 2.0 Nitrate_c + 1.0 NADP__c
rxn05460	0.0891331	1.0 Hexadecanoyl__acp__c + 1.0 H__c + 1.0 Malonyl__acyl_carrier_protein__c = 1.0 3_Oxooctodecanoyl_ACP_c + 1.0 CO2_c + 1.0 Acyl_carrier_protein_c
rxn05429	0.0891331	1.0 12_methyl_tridecanoyl_ACP_c + 1.0 H__c + 1.0 Malonyl__acyl_carrier_protein__c = 1.0 CO2_c + 1.0 Acyl_carrier_protein_c + 1.0 14_methyl_3_oxo_pentadecanoyl_ACP_c
rxn05425	0.0891331	1.0 H__c + 1.0 Malonyl__acyl_carrier_protein__c + 1.0 10_methyl_undecanoyl_ACP_c = 1.0 12_methyl_3_oxo_tridecanoyl_ACP_c + 1.0 CO2_c + 1.0 Acyl_carrier_protein_c
rxn05421	0.0891331	1.0 H__c + 1.0 Malonyl__acyl_carrier_protein__c + 1.0 8_methyl_nonanoyl_ACP_c = 1.0 CO2_c + 1.0 Acyl_carrier_protein_c + 1.0 10_methyl_3_oxo_undecanoyl_ACP_c
rxn05417	0.0891331	1.0 H__c + 1.0 6_methyl_heptanoyl_ACP_c + 1.0 Malonyl__acyl_carrier_protein__c = 1.0 CO2_c + 1.0 Acyl_carrier_protein_c + 1.0 8_methyl_3_oxo_nonanoyl_ACP_c
rxn05413	0.0891331	1.0 H__c + 1.0 4_methyl_pentanoyl_ACP_c + 1.0 Malonyl__acyl_carrier_protein__c = 1.0 CO2_c + 1.0 Acyl_carrier_protein_c + 1.0 6_methyl_3_oxo_heptanoyl_ACP_c
rxn05409	0.0891331	1.0 H__c + 1.0 Malonyl__acyl_carrier_protein__c + 1.0 2_methylpropionyl_ACP_c = 1.0 CO2_c + 1.0 Acyl_carrier_protein_c + 1.0 4_methyl_3_oxo_pentanoyl_ACP_c
rxn05350	0.0891331	1.0 Hexanoyl__acp__c + 1.0 Malonyl__acyl_carrier_protein__c + 1.0 H__c = 1.0 3_Oxooctanoyl__acp__c + 1.0 CO2_c + 1.0 Acyl_carrier_protein_c
rxn05349	0.0891331	1.0 Acetyl_CoA_c + 1.0 Acyl_carrier_protein_c = 1.0 Acetyl__acyl_carrier_protein__c + 1.0 CoA_c
rxn05348	0.0891331	1.0 Decanoyl__acp__c + 1.0 H__c + 1.0 Malonyl__acyl_carrier_protein__c = 1.0 3_Oxododecanoyl__acp__c + 1.0 CO2_c + 1.0 Acyl_carrier_protein_c
rxn05347	0.0891331	1.0 H__c + 1.0 Acetyl__acyl_carrier_protein__c + 1.0 Malonyl__acyl_carrier_protein__c = 1.0 CO2_c + 1.0 Acetoacetyl__acp__c + 1.0 Acyl_carrier_protein_c
rxn05346	0.0891331	1.0 H__c + 1.0 Malonyl__acyl_carrier_protein__c + 1.0 Butyryl__acp__c = 1.0 CO2_c + 1.0 Acyl_carrier_protein_c + 1.0 3_Oxohexanoyl__acp__c
rxn05345	0.0891331	1.0 H__c + 1.0 Malonyl__acyl_carrier_protein__c + 1.0 Dodecanoyl__acyl_carrier_protein__c = 1.0 3_Oxotetradecanoyl__acp__c + 1.0 CO2_c + 1.0 Acyl_carrier_protein_c
rxn05344	0.0891331	1.0 Tetradecanoyl__acp__c + 1.0 Malonyl__acyl_carrier_protein__c + 1.0 H__c = 1.0 CO2_c + 1.0 3_Oxohexadecanoyl__acp__c + 1.0 Acyl_carrier_protein_c
rxn05343	0.0891331	1.0 H__c + 1.0 Octanoyl__acp__c + 1.0 Malonyl__acyl_carrier_protein__c = 1.0 3_Oxodecanoyl__acp__c + 1.0 CO2_c + 1.0 Acyl_carrier_protein_c
rxn05733	0.0890843	1.0 O_Acetyl_L_serine_c + 1.0 Thiosulfate_c + 1.0 trdrd_c = 1.0 Sulfite_c + 1.0 trdox_c + 1.0 L_Cysteine_c + 1.0 Acetate_c
rxn00588	0.0885203	1.0 Catechol_c + 1.0 Oxygen_c = 2.0 H__c + 1.0 cis_cis_Muconate_c
rxn05735	0.0872534	1.0 NAD__c + 1.0 H2O_c + 1.0 Aminoacetaldehyde_c = 2.0 H__c + 1.0 NADH_c + 1.0 Glycine_c
rxn05734	0.0872534	1.0 NAD__c + 1.0 H2O_c + 1.0 Glyoxylate_c = 1.0 Oxalate_c + 1.0 NADH_c + 2.0 H__c
rxn02853	0.0872534	1.0 NAD__c + 1.0 H2O_c + 1.0 Imidazole_4_acetaldehyde_c = 1.0 Imidazole_4_acetate_c + 2.0 H__c + 1.0 NADH_c
rxn01459	0.0872534	1.0 H2O_c + 1.0 NADP__c + 1.0 4_Aminobutyraldehyde_c = 1.0 4_Aminobutanoate_c + 1.0 NADPH_c + 2.0 H__c
rxn01286	0.0872534	1.0 NAD__c + 1.0 D_Glyceraldehyde_c + 1.0 H2O_c = 2.0 H__c + 1.0 D_Glycerate_c + 1.0 NADH_c
rxn00506	0.0872534	1.0 NAD__c + 1.0 H2O_c + 1.0 Acetaldehyde_c = 2.0 H__c + 1.0 NADH_c + 1.0 Acetate_c
rxn05442	0.0870615	1.0 H__c + 1.0 11_methyl_trans_dodec_2_enoyl_ACP_c + 1.0 NADH_c = 1.0 NAD__c + 1.0 11_methyl_dodecanoyl_ACP_c
rxn01280	0.0866124	1.0 NAD__c + 1.0 D_Glycerate_c = 1.0 H__c + 1.0 NADH_c + 1.0 2_Hydroxy_3_oxopropanoate_c
rxn00640	0.0864914	1.0 D_Mannose_1_phosphate_c + 1.0 GDP_c = 1.0 GDP_mannose_c + 1.0 H__c + 1.0 Orthophosphate_c
rxn02177	0.0859125	1.0 H2O_c + 1.0 Isochorismate_c = 1.0 Pyruvate_c + 1.0 2_3_Dihydro_2_3_dihydroxybenzoate_c
rxn03483	0.0852888	1.0 2__3__Cyclic_GMP_c + 1.0 H2O_c = 1.0 Guanosine_3__phosphate_c
rxn02762	0.0852888	1.0 H2O_c + 1.0 2__3__Cyclic_CMP_c = 1.0 3__CMP_c
rxn02522	0.0852888	1.0 H2O_c + 1.0 2__3__Cyclic_UMP_c = 1.0 3__UMP_c
rxn02521	0.0852888	1.0 H2O_c + 1.0 2__3__Cyclic_AMP_c = 1.0 3__AMP_c
rxn01997	0.0842782	1.0 dTDP_glucose_c = 1.0 H2O_c + 1.0 4_6_Dideoxy_4_oxo_dTDP_D_glucose_c
rxn00473	0.0842782	1.0 L_Tryptophan_c + 1.0 H2O_c = 1.0 Pyruvate_c + 1.0 Indole_c + 1.0 NH3_c
rxn00114	0.0842782	1.0 H__c + 1.0 ADP_c + 1.0 Carbamoyl_phosphate_c = 1.0 CO2_c + 1.0 ATP_c + 1.0 NH3_c
t_cpd00644	0.0839288	1.0 Pantothenate_e + 1.0 H__e = 1.0 H__c + 1.0 Pantothenate_c
t_cpd00121	0.0839288	1.0 myo_Inositol_e + 1.0 H__e = 1.0 H__c + 1.0 myo_Inositol_c
rxn09296	0.0839288	1.0 H2O2_c + 1.0 trdrd_c = 2.0 H2O_c + 1.0 trdox_c
rxn05593	0.0839288	1.0 myo_Inositol_e + 1.0 H__e = 1.0 H__c + 1.0 myo_Inositol_c
rxn00737	0.0839288	1.0 L_Threonine_c = 1.0 NH3_c + 1.0 2_Oxobutanoate_c
rxn02866	0.0836891	1.0 3_Methylbutanoyl_CoA_c + 1.0 FAD_c = 1.0 FADH2_c + 1.0 3_Methylcrotonyl_CoA_c
rxn00991	0.0836891	1.0 _S__3_Hydroxy_3_methylglutaryl_CoA_c = 1.0 Acetoacetate_c + 1.0 Acetyl_CoA_c
rxn01457	0.083108	1.0 D_Galacturonate_c = 1.0 D_Tagaturonate_c
rxn01080	0.083108	1.0 D_Glucuronate_c = 1.0 D_Fructuronate_c
rxn01123	0.0819933	1.0 2_Dehydro_3_deoxy_D_gluconate_c + 1.0 ATP_c = 1.0 2_Dehydro_3_deoxy_6_phospho_D_gluconate_c + 1.0 ADP_c
rxn02632	0.081897	1.0 NAD__c + 1.0 _S_S__Butane_2_3_diol_c = 1.0 _S__Acetoin_c + 1.0 H__c + 1.0 NADH_c
rxn03990	0.0817241	1.0 NADH_c + 2.0 Oxygen_c + 2.0 Nitric_oxide_c = 1.0 NAD__c + 1.0 H__c + 2.0 Nitrate_c
rxn01484	0.0817203	1.0 H2O_c + 1.0 N_Acetyl_D_glucosamine_6_phosphate_c = 1.0 D_Glucosamine_6_phosphate_c + 1.0 Acetate_c
t_cpd00027	0.0811489	1.0 H2O_c + 1.0 D_Glucose_e + 1.0 ATP_c = 1.0 H__c + 1.0 Orthophosphate_c + 1.0 D_Glucose_c + 1.0 ADP_c
rxn03075	0.0810757	1.0 5__2_Hydroxyethyl__4_methylthiazole_c + 1.0 ATP_c = 1.0 4_Methyl_5__2_phosphoethyl__thiazole_c + 1.0 ADP_c
t_cpd00035	0.0805979	1.0 Sodium_e + 1.0 L_Alanine_e = 1.0 L_Alanine_c + 1.0 Sodium_c
rxn05215	0.0805979	1.0 Sodium_e + 1.0 L_Alanine_e = 1.0 L_Alanine_c + 1.0 Sodium_c
rxn01281	0.0805593	1.0 D_Glycerate_c + 1.0 NADP__c = 1.0 2_Hydroxy_3_oxopropanoate_c + 1.0 NADPH_c + 1.0 H__c
rxn05119	0.0800358	1.0 NAD__c + 1.0 L_Aspartate_c = 1.0 Iminoaspartate_c + 1.0 NADH_c + 2.0 H__c
rxn03108	0.0800358	1.0 ATP_c + 1.0 4_Amino_2_methyl_5_phosphomethylpyrimidine_c = 1.0 2_Methyl_4_amino_5_hydroxymethylpyrimidine_diphosphate_c + 1.0 ADP_c
rxn02484	0.0800358	1.0 ATP_c + 1.0 4_Amino_5_hydroxymethyl_2_methylpyrimidine_c = 1.0 ADP_c + 1.0 4_Amino_2_methyl_5_phosphomethylpyrimidine_c
rxn00910	0.0800358	1.0 5_Methyltetrahydrofolate_c + 1.0 NADP__c = 1.0 H__c + 1.0 5_10_Methylenetetrahydrofolate_c + 1.0 NADPH_c
rxn00324	0.0793237	1.0 Glycolate_c + 1.0 NADP__c = 1.0 H__c + 1.0 NADPH_c + 1.0 Glyoxylate_c
t_cpd00047	0.0782456	1.0 Formate_e + 1.0 H__e = 1.0 H__c + 1.0 Formate_c
rxn05559	0.0782456	1.0 Formate_e + 1.0 H__e = 1.0 H__c + 1.0 Formate_c
rxn00986	0.0779189	1.0 Diphosphate_c + 1.0 Propinol_adenylate_c = 1.0 Propanoate_c + 1.0 ATP_c + 1.0 H__c
rxn00675	0.0779189	1.0 CoA_c + 1.0 Propinol_adenylate_c = 1.0 Propanoyl_CoA_c + 1.0 AMP_c
rxn01013	0.0773659	1.0 D_Glycerate_c + 1.0 NADP__c = 1.0 NADPH_c + 1.0 Hydroxypyruvate_c + 1.0 H__c
rxn01011	0.0773659	1.0 NAD__c + 1.0 D_Glycerate_c = 1.0 H__c + 1.0 NADH_c + 1.0 Hydroxypyruvate_c
rxn00512	0.0773659	1.0 NAD__c + 1.0 Glycolate_c = 1.0 H__c + 1.0 NADH_c + 1.0 Glyoxylate_c
rxn00649	0.0772782	1.0 Hydrogen_sulfide_c + 1.0 O_Acetyl_L_serine_c = 1.0 H__c + 1.0 L_Cysteine_c + 1.0 Acetate_c
rxn05323	0.0770728	1.0 trans_Tetradec_2_enoyl__acp__c + 1.0 NADH_c + 1.0 H__c = 1.0 NAD__c + 1.0 Tetradecanoyl__acp__c
rxn05627	0.0770078	1.0 Nitrate_e + 1.0 H__e = 1.0 H__c + 1.0 Nitrate_c
t_cpd00209	0.0770078	1.0 Nitrate_e + 1.0 H__e = 1.0 H__c + 1.0 Nitrate_c
t_cpd00075	0.0770078	1.0 Nitrite_e + 1.0 H__e = 1.0 H__c + 1.0 Nitrite_c
rxn00290	0.0749654	1.0 Succinyl_CoA_c + 1.0 Acetoacetate_c = 1.0 Succinate_c + 1.0 Acetoacetyl_CoA_c
rxn06600	0.0749517	1.0 S_Aminomethyldihydrolipoylprotein_c + 1.0 Tetrahydrofolate_c = 1.0 Dihydrolipoylprotein_c + 1.0 5_10_Methylenetetrahydrofolate_c + 1.0 NH3_c
rxn00260	0.0749517	1.0 2_Oxoglutarate_c + 1.0 L_Aspartate_c = 1.0 L_Glutamate_c + 1.0 Oxaloacetate_c
rxn02003	0.0748005	1.0 dTDP_6_deoxy_L_mannose_c + 1.0 NADP__c = 1.0 H__c + 1.0 dTDP_4_dehydro_6_deoxy_L_mannose_c + 1.0 NADPH_c
rxn00552	0.0736583	1.0 H2O_c + 1.0 D_Glucosamine_6_phosphate_c = 1.0 D_Fructose_6_phosphate_c + 1.0 NH3_c
rxn01291	0.0736183	1.0 L_Arabitol_c + 1.0 NADP__c = 1.0 H__c + 1.0 NADPH_c + 1.0 L_Arabinose_c
rxn00544	0.0733464	1.0 Thiamin_diphosphate_c + 1.0 Acetaldehyde_c = 1.0 2__alpha_Hydroxyethyl_thiamine_diphosphate_c
rxn02000	0.0732526	1.0 4_6_Dideoxy_4_oxo_dTDP_D_glucose_c = 1.0 dTDP_4_dehydro_6_deoxy_L_mannose_c
rxn00394	0.0728563	1.0 H2O_c + 1.0 L_Arginine_c = 1.0 Urea_c + 1.0 L_Ornithine_c
rxn00808	0.0726789	1.0 D_Galactose_c + 1.0 ATP_c = 1.0 alpha_D_Galactose_1_phosphate_c + 1.0 ADP_c
t_cpd00244	0.0707895	1.0 H2O_c + 1.0 ATP_c + 1.0 Nickel_e = 1.0 Nickel_c + 1.0 H__c + 1.0 Orthophosphate_c + 1.0 ADP_c
rxn05174	0.0707895	1.0 H2O_c + 1.0 ATP_c + 1.0 Nickel_e = 1.0 Nickel_c + 1.0 H__c + 1.0 Orthophosphate_c + 1.0 ADP_c
t_cpd00226	0.0705758	1.0 Hypoxanthine_e + 1.0 H__e = 1.0 H__c + 1.0 Hypoxanthine_c
rxn05201	0.0705758	1.0 Hypoxanthine_e + 1.0 H__e = 1.0 H__c + 1.0 Hypoxanthine_c
rxn03917	0.0702759	1.0 Sedoheptulose_7_phosphate_c = 1.0 D_glycero_D_manno_Heptose_7_phosphate_c
rxn07589	0.0698113	1.0 Cobalt_precorrin_7_c + 1.0 S_Adenosyl_L_methionine_c = 1.0 CO2_c + 1.0 S_Adenosyl_L_homocysteine_c + 1.0 Cobalt_precorrin_8_c
rxn07588	0.0698113	1.0 S_Adenosyl_L_methionine_c + 1.0 Cobalt_dihydro_precorrin_6_c = 1.0 Cobalt_precorrin_7_c + 1.0 H__c + 1.0 S_Adenosyl_L_homocysteine_c
rxn03491	0.0698113	1.0 Precorrin_6Y_c + 2.0 S_Adenosyl_L_methionine_c = 2.0 H__c + 1.0 CO2_c + 1.0 Precorrin_8X_c + 2.0 S_Adenosyl_L_homocysteine_c
rxn05957	0.0696389	1.0 Hydrogen_sulfide_c + 1.0 O_Succinyl_L_homoserine_c = 1.0 Succinate_c + 1.0 H__c + 1.0 L_Homocysteine_c
t_cpd00106	0.0691257	1.0 Fumarate_e + 1.0 H__e = 1.0 H__c + 1.0 Fumarate_c
rxn08556	0.0690917	1.0 sn_Glycerol_3_phosphate_c + 1.0 Ubiquinone_8_c = 1.0 Glycerone_phosphate_c + 1.0 Ubiquinol_8_c
rxn10122	0.0689988	4.5 H__c + 1.0 NADH_c + 1.0 Ubiquinone_8_c = 1.0 NAD__c + 1.0 Ubiquinol_8_c + 3.5 H__e
rxn00131	0.0689944	1.0 H2O_c + 1.0 AMP_c = 1.0 D_Ribose_5_phosphate_c + 1.0 Adenine_c
rxn02875	0.0688392	1.0 H2O_c + 1.0 N_Acetylmuramoyl_Ala_c = 1.0 L_Alanine_c + 1.0 N_Acetylmuramate_c
rxn01833	0.0684855	1.0 H2O_c + 1.0 Oxygen_c + 1.0 Aminoacetone_c = 1.0 H2O2_c + 1.0 Methylglyoxal_c + 1.0 NH3_c
rxn01715	0.0684855	1.0 H2O_c + 1.0 Tyramine_c + 1.0 Oxygen_c = 1.0 H2O2_c + 1.0 4_Hydroxyphenylacetaldehyde_c + 1.0 NH3_c
rxn01299	0.0682373	1.0 H2O_c + 1.0 Inosine_c = 1.0 D_Ribose_c + 1.0 Hypoxanthine_c
rxn12147	0.0669775	1.0 3D__3_5_4__Trihydroxycyclohexane_1_2_dione_c + 1.0 H2O_c = 1.0 H__c + 1.0 5_Deoxy_glucuronic_acid_c
rxn03931	0.0669775	1.0 3D__3_5_4__Trihydroxycyclohexane_1_2_dione_c + 1.0 H2O_c = 1.0 H__c + 1.0 2_Deoxy_5_keto_D_gluconic_acid_c
rxn05638	0.066777	1.0 L_Proline_e + 1.0 H__e = 1.0 H__c + 1.0 L_Proline_c
t_cpd00162	0.0667454	1.0 Ethanolamine_e + 1.0 H__e = 1.0 H__c + 1.0 Ethanolamine_c
rxn05551	0.0667454	1.0 Ethanolamine_e + 1.0 H__e = 1.0 H__c + 1.0 Ethanolamine_c
rxn00405	0.0666337	1.0 H__c + 1.0 L_Arginine_c = 1.0 Agmatine_c + 1.0 CO2_c
rxn00322	0.0666337	1.0 L_Lysine_c + 1.0 H__c = 1.0 CO2_c + 1.0 Cadaverine_c
rxn01834	0.0665784	1.0 _R__S_Lactoylglutathione_c = 1.0 Methylglyoxal_c + 1.0 Glutathione_c
rxn05441	0.0661317	1.0 9_methyl_trans_dec_2_enoyl_ACP_c + 1.0 NADH_c + 1.0 H__c = 1.0 NAD__c + 1.0 9_methyl_decanoyl_ACP_c
rxn05605	0.0660494	1.0 _S__Malate_e + 1.0 H__e = 1.0 H__c + 1.0 _S__Malate_c
rxn00714	0.0655029	1.0 H2O_c + 1.0 P1_P4_Bis_5__uridyl__tetraphosphate_c = 1.0 UMP_c + 1.0 UTP_c
rxn11946	0.0651385	1.0 S_Adenosyl_L_methionine_c + 1.0 2_Octaprenyl_3_methyl_5_hydroxy_6_methoxy_1_4_benzoquinone_c = 1.0 S_Adenosyl_L_homocysteine_c + 1.0 Ubiquinone_8_c
rxn03395	0.0651385	1.0 S_Adenosyl_L_methionine_c + 1.0 2_Octaprenyl_6_hydroxyphenol_c = 1.0 H__c + 1.0 2_Octaprenyl_6_methoxyphenol_c + 1.0 S_Adenosyl_L_homocysteine_c
rxn10120	0.0628774	2.0 H__c + 1.0 Nitrate_c + 1.0 Ubiquinol_8_c = 1.0 H2O_c + 1.0 Nitrite_c + 1.0 Ubiquinone_8_c + 2.0 H__e
rxn02312	0.062846	1.0 S_Adenosyl_L_methionine_c + 1.0 8_Amino_7_oxononanoate_c = 1.0 S_Adenosyl_4_methylthio_2_oxobutanoate_c + 1.0 7_8_Diaminononanoate_c
t_cpd00179	0.0626737	1.0 Maltose_e + 1.0 H2O_c + 1.0 ATP_c = 1.0 H__c + 1.0 Orthophosphate_c + 1.0 ADP_c + 1.0 Maltose_c
rxn05170	0.0626737	1.0 Maltose_e + 1.0 H2O_c + 1.0 ATP_c = 1.0 H__c + 1.0 Orthophosphate_c + 1.0 ADP_c + 1.0 Maltose_c
rxn02277	0.0625479	1.0 CO2_c + 1.0 7_8_Diaminononanoate_c + 1.0 ATP_c = 3.0 H__c + 1.0 Orthophosphate_c + 1.0 Dethiobiotin_c + 1.0 ADP_c
rxn00292	0.0619968	1.0 H2O_c + 1.0 UDP_N_acetyl_D_glucosamine_c = 1.0 UDP_c + 1.0 N_Acetyl_D_mannosamine_c
rxn01675	0.0614541	1.0 dTTP_c + 1.0 D_Glucose_1_phosphate_c = 1.0 dTDP_glucose_c + 1.0 Diphosphate_c
rxn02831	0.0612378	1.0 2_Succinylbenzoate_c + 1.0 CoA_c + 1.0 ATP_c + 1.0 H__c = 1.0 2_Succinylbenzoyl_CoA_c + 1.0 Diphosphate_c + 1.0 AMP_c
t_cpd00264	0.0611325	1.0 H2O_c + 1.0 Spermidine_e + 1.0 ATP_c = 1.0 H__c + 1.0 Orthophosphate_c + 1.0 Spermidine_c + 1.0 ADP_c
t_cpd00322	0.0606545	1.0 H2O_c + 1.0 L_Isoleucine_e + 1.0 ATP_c = 1.0 H__c + 1.0 Orthophosphate_c + 1.0 L_Isoleucine_c + 1.0 ADP_c
t_cpd00156	0.0606545	1.0 H2O_c + 1.0 L_Valine_e + 1.0 ATP_c = 1.0 H__c + 1.0 Orthophosphate_c + 1.0 L_Valine_c + 1.0 ADP_c
t_cpd00107	0.0606545	1.0 H2O_c + 1.0 ATP_c + 1.0 L_Leucine_e = 1.0 H__c + 1.0 Orthophosphate_c + 1.0 ADP_c + 1.0 L_Leucine_c
rxn04045	0.0602891	2.0 H__c + 1.0 Sirohydrochlorin_c + 1.0 Cobalt_c = 1.0 Cobalt_precorrin_2_c
rxn01966	0.0596878	1.0 alpha_alpha_Trehalose_c + 1.0 H__c + 1.0 Orthophosphate_c = 1.0 D_Glucose_c + 1.0 beta_D_Glucose_1_phosphate_c
rxn00913	0.0593434	1.0 H2O_c + 1.0 GMP_c = 1.0 H__c + 1.0 Orthophosphate_c + 1.0 Guanosine_c
rxn07586	0.0592795	1.0 H2O_c + 1.0 Cobalt_precorrin_5_c = 1.0 Cobalt_precorrin_5B_c + 1.0 Acetaldehyde_c + 1.0 H__c
rxn01523	0.0591983	1.0 H2O_c + 1.0 Urate_c + 1.0 Oxygen_c = 1.0 5_Hydroxyisourate_c + 1.0 H2O2_c
rxn01545	0.058659	1.0 H2O_c + 1.0 Xanthosine_c = 1.0 Xanthine_c + 1.0 D_Ribose_c
rxn01620	0.0578359	1.0 L_Fuculose_1_phosphate_c = 1.0 Glycerone_phosphate_c + 1.0 _S__Lactaldehyde_c
rxn10824	0.0578359	1.0 L_Ornithine_e = 1.0 L_Ornithine_c
rxn01951	0.0578246	1.0 ATP_c + 1.0 N_Acetyl_D_mannosamine_c = 1.0 ADP_c + 1.0 N_Acetyl_D_mannosamine_6_phosphate_c
rxn01132	0.0575373	1.0 H__c + 1.0 Orthophosphate_c + 1.0 Maltose_c = 1.0 D_Glucose_c + 1.0 beta_D_Glucose_1_phosphate_c
rxn02429	0.0573742	1.0 2_Dehydro_3_deoxy_D_galactonate_c + 1.0 ATP_c = 1.0 2_Dehydro_3_deoxy_D_galactonate_6_phosphate_c + 1.0 ADP_c
rxn02173	0.0573742	1.0 D_Galactonate_c = 1.0 H2O_c + 1.0 2_Dehydro_3_deoxy_D_galactonate_c
rxn00783	0.0573742	1.0 2_Dehydro_3_deoxy_D_galactonate_6_phosphate_c = 1.0 Pyruvate_c + 1.0 D_Glyceraldehyde_3_phosphate_c
rxn00634	0.0571875	1.0 NAD__c + 1.0 D_Sorbitol_c = 1.0 H__c + 1.0 NADH_c + 1.0 D_Fructose_c
rxn00745	0.0568123	1.0 Glycerone_c + 1.0 Phosphoenolpyruvate_c = 1.0 Pyruvate_c + 1.0 Glycerone_phosphate_c
rxn01226	0.0567908	1.0 H2O_c + 1.0 Guanosine_c = 1.0 D_Ribose_c + 1.0 Guanine_c
rxn00927	0.0567908	1.0 H2O_c + 1.0 Adenosine_c = 1.0 D_Ribose_c + 1.0 Adenine_c
rxn01275	0.0565965	1.0 D_Gluconic_acid_c + 1.0 ATP_c = 1.0 6_Phospho_D_gluconate_c + 1.0 ADP_c
rxn02007	0.0563517	1.0 2_4_6_3_5_Pentahydroxycyclohexanone_c = 1.0 3D__3_5_4__Trihydroxycyclohexane_1_2_dione_c + 1.0 H2O_c
rxn05939	0.0562457	1.0 H__c + 1.0 Succinyl_CoA_c + 1.0 Reduced_ferredoxin_c + 1.0 CO2_c = 1.0 Oxidized_ferredoxin_c + 1.0 2_Oxoglutarate_c + 1.0 CoA_c
rxn00992	0.0560351	1.0 NAD__c + 1.0 _R__3_Hydroxybutanoate_c = 1.0 H__c + 1.0 NADH_c + 1.0 Acetoacetate_c
rxn01670	0.0551936	1.0 Nicotinamide_D_ribonucleotide_c + 1.0 H2O_c = 1.0 N_Ribosylnicotinamide_c + 1.0 H__c + 1.0 Orthophosphate_c
rxn01507	0.0551936	1.0 H2O_c + 1.0 dAMP_c = 1.0 H__c + 1.0 Orthophosphate_c + 1.0 Deoxyadenosine_c
rxn01445	0.0551936	1.0 H2O_c + 1.0 dGMP_c = 1.0 H__c + 1.0 Orthophosphate_c + 1.0 Deoxyguanosine_c
rxn00708	0.0551936	1.0 UMP_c + 1.0 H2O_c = 1.0 H__c + 1.0 Orthophosphate_c + 1.0 Uridine_c
rxn00363	0.0551936	1.0 H2O_c + 1.0 CMP_c = 1.0 H__c + 1.0 Orthophosphate_c + 1.0 Cytidine_c
rxn00132	0.0551936	1.0 H2O_c + 1.0 AMP_c = 1.0 H__c + 1.0 Orthophosphate_c + 1.0 Adenosine_c
rxn00342	0.0549831	1.0 H2O_c + 1.0 L_Asparagine_c = 1.0 L_Aspartate_c + 1.0 NH3_c
rxn01225	0.054873	1.0 H__c + 1.0 H2O_c + 1.0 Guanine_c = 1.0 Xanthine_c + 1.0 NH3_c
rxn03538	0.054583	1.0 alpha_Ribazole_c + 1.0 Adenosine_GDP_cobinamide_c = 1.0 GMP_c + 1.0 Cobamide_coenzyme_c
rxn05054	0.0544877	1.0 Adenosyl_cobyrinate_hexaamide_c + 1.0 _R__1_Aminopropan_2_ol_c + 1.0 ATP_c = 1.0 H__c + 1.0 Orthophosphate_c + 1.0 Adenosyl_cobinamide_c + 1.0 ADP_c
rxn04384	0.0544877	1.0 D_1_Aminopropan_2_ol_O_phosphate_c + 1.0 Adenosyl_cobyrinate_hexaamide_c + 1.0 ATP_c = 2.0 H__c + 1.0 Orthophosphate_c + 1.0 Adenosyl_cobinamide_phosphate_c + 1.0 ADP_c
rxn03540	0.0544877	4.0 L_Glutamine_c + 4.0 H2O_c + 4.0 ATP_c + 1.0 Adenosyl_cobyrinate_a_c_diamide_c = 4.0 H__c + 4.0 Orthophosphate_c + 1.0 Adenosyl_cobyrinate_hexaamide_c + 4.0 L_Glutamate_c + 4.0 ADP_c
rxn00551	0.0544654	1.0 Diphosphate_c + 1.0 D_Fructose_6_phosphate_c = 1.0 H__c + 1.0 Orthophosphate_c + 1.0 D_Fructose_1_6_bisphosphate_c
rxn12146	0.0542234	1.0 5_Deoxy_glucuronic_acid_c = 1.0 2_Deoxy_5_keto_D_gluconic_acid_c
rxn00690	0.0542172	1.0 Formate_c + 1.0 ATP_c + 1.0 Tetrahydrofolate_c = 1.0 10_Formyltetrahydrofolate_c + 1.0 Orthophosphate_c + 1.0 ADP_c
rxn00669	0.0541217	1.0 Propanoate_c + 1.0 CoA_c + 1.0 ATP_c = 1.0 Propanoyl_CoA_c + 1.0 Orthophosphate_c + 1.0 ADP_c
rxn01967	0.0537788	1.0 beta_D_Glucose_1_phosphate_c = 1.0 beta_D_Glucose_6_phosphate_c
rxn10342	0.0537605	2.0 Diisohexadecanoylphosphatidylglycerol_c = 1.0 Glycerol_c + 1.0 Isohexadecanoylcardiolipin__B__subtilis__c
rxn10341	0.0537605	2.0 Dianteisopentadecanoylphosphatidylglycerol_c = 1.0 Glycerol_c + 1.0 Anteisopentadecanoylcardiolipin__B__subtilis__c
rxn10340	0.0537605	2.0 Diisopentadecanoylphosphatidylglycerol_c = 1.0 Glycerol_c + 1.0 Isopentadecanoylcardiolipin__B__subtilis__c
rxn10339	0.0537605	2.0 Diisotetradecanoylphosphatidylglycerol_c = 1.0 Glycerol_c + 1.0 Isotetradecanoylcardiolipin__B__subtilis__c
rxn10338	0.0537605	2.0 Dianteisoheptadecanoylphosphatidylglycerol_c = 1.0 Glycerol_c + 1.0 Anteisoheptadecanoylcardiolipin__B__subtilis__c
rxn10337	0.0537605	2.0 Diisoheptadecanoylphosphatidylglycerol_c = 1.0 Glycerol_c + 1.0 Isoheptadecanoylcardiolipin__B__subtilis__c
rxn10336	0.0537605	2.0 Phosphatidylglycerol_dioctadecanoyl_c = 1.0 Stearoylcardiolipin__B__subtilis__c + 1.0 Glycerol_c
rxn10335	0.0537605	2.0 Phosphatidylglycerol_ditetradecanoyl_c = 1.0 Myristoylcardiolipin__B__subtilis__c + 1.0 Glycerol_c
rxn10334	0.0537605	2.0 Phosphatidylglycerol_dihexadecanoyl_c = 1.0 Glycerol_c + 1.0 Palmitoylcardiolipin__B__subtilis__c
rxn04048	0.0535975	1.0 S_Adenosyl_L_methionine_c + 1.0 Cobalt_precorrin_4_c = 1.0 S_Adenosyl_L_homocysteine_c + 1.0 Cobalt_precorrin_5_c
rxn03514	0.0535975	1.0 S_Adenosyl_L_methionine_c + 1.0 Precorrin_4_c = 1.0 H__c + 1.0 Precorrin_5_c + 1.0 S_Adenosyl_L_homocysteine_c
rxn05669	0.0535229	1.0 L_Valine_e + 1.0 H__e = 1.0 H__c + 1.0 L_Valine_c
rxn05244	0.0535229	1.0 L_Isoleucine_e + 1.0 H__e = 1.0 H__c + 1.0 L_Isoleucine_c
rxn05243	0.0535229	1.0 H__e + 1.0 L_Leucine_e = 1.0 H__c + 1.0 L_Leucine_c
rxn01015	0.0533447	1.0 Hydroxypyruvate_c = 1.0 2_Hydroxy_3_oxopropanoate_c
rxn00568	0.053318	5.0 H__c + 3.0 NADH_c + 1.0 Nitrite_c = 3.0 NAD__c + 2.0 H2O_c + 1.0 NH3_c
rxn02143	0.0529071	1.0 Succinyl_CoA_c + 1.0 3_Oxoadipate_c = 1.0 Succinate_c + 1.0 3_Oxoadipyl_CoA_c
rxn05573	0.0528617	1.0 D_Glucose_e + 1.0 H__e = 1.0 H__c + 1.0 D_Glucose_c
t_cpd00138	0.0528617	1.0 H__c + 1.0 D_Glucose_e + 1.0 D_Mannose_c = 1.0 H__e + 1.0 D_Glucose_c + 1.0 D_Mannose_e
rxn10253	0.052828	1.0 1_2_Diisoheptadecanoyl_sn_glycerol_c + 1.0 ATP_c = 1.0 1_2_diisoheptadecanoyl_sn_glycerol_3_phosphate_c + 1.0 ADP_c
rxn10238	0.052828	1.0 H2O_c + 1.0 1_2_diisoheptadecanoyl_sn_glycerol_3_phosphate_c = 1.0 H__c + 1.0 Orthophosphate_c + 1.0 1_2_Diisoheptadecanoyl_sn_glycerol_c
rxn11650	0.0524299	1.0 flavin_mononucleotide_reduced_c + 2.0 Cob_II_yrinate_a_c_diamide_c = 2.0 H__c + 1.0 FMN_c + 2.0 Cob_I_yrinate_a_c_diamide_c
rxn02161	0.0509092	1.0 ATP_c + 1.0 L_Rhamnulose_c = 1.0 L_Rhamnulose_1_phosphate_c + 1.0 ADP_c
rxn01761	0.0509092	1.0 L_Rhamnose_c = 1.0 L_Rhamnulose_c
rxn01621	0.0509092	1.0 L_Rhamnulose_1_phosphate_c = 1.0 Glycerone_phosphate_c + 1.0 _S__Lactaldehyde_c
rxn01390	0.0509092	1.0 L_Xylulose_c + 1.0 ATP_c = 1.0 L_Xylulose_1_phosphate_c + 1.0 ADP_c
rxn04050	0.0507576	1.0 H__c + 1.0 NADPH_c + 1.0 Cobalt_precorrin_6_c = 1.0 Cobalt_dihydro_precorrin_6_c + 1.0 NADP__c
rxn03492	0.0507576	1.0 Precorrin_6Y_c + 1.0 NADP__c = 1.0 H__c + 1.0 NADPH_c + 1.0 Precorrin_6X_c
rxn05024	0.0500495	1.0 H__c + 1.0 2_Succinylbenzoyl_CoA_c = 1.0 1_4_Dihydroxy_2_naphthoyl_CoA_c + 1.0 H2O_c
rxn03932	0.0472513	1.0 2_Deoxy_5_keto_D_gluconic_acid_c + 1.0 ATP_c = 1.0 6_Phospho_5_dehydro_2_deoxy_D_gluconate_c + 1.0 ADP_c
rxn01176	0.0472513	1.0 6_Phospho_5_dehydro_2_deoxy_D_gluconate_c = 1.0 Glycerone_phosphate_c + 1.0 3_Oxopropanoate_c
t_cpd01329	0.0470644	1.0 H2O_c + 1.0 ATP_c + 1.0 Maltohexaose_e = 1.0 Maltohexaose_c + 1.0 H__c + 1.0 Orthophosphate_c + 1.0 ADP_c
t_cpd01262	0.0470644	1.0 H2O_c + 1.0 ATP_c + 1.0 Maltotriose_e = 1.0 Maltotriose_c + 1.0 H__c + 1.0 Orthophosphate_c + 1.0 ADP_c
rxn10174	0.0470644	1.0 H2O_c + 1.0 ATP_c + 1.0 Maltohexaose_e = 1.0 Maltohexaose_c + 1.0 H__c + 1.0 Orthophosphate_c + 1.0 ADP_c
rxn05608	0.0470644	1.0 H2O_c + 1.0 ATP_c + 1.0 Maltotriose_e = 1.0 Maltotriose_c + 1.0 H__c + 1.0 Orthophosphate_c + 1.0 ADP_c
rxn00355	0.0468039	1.0 UTP_c + 1.0 alpha_D_Galactose_1_phosphate_c = 1.0 Diphosphate_c + 1.0 UDP_D_galactose_c
rxn00858	0.0465185	1.0 Agmatine_c + 1.0 H2O_c = 1.0 Putrescine_c + 1.0 Urea_c
t_cpd00130	0.0464406	1.0 Sodium_e + 1.0 _S__Malate_e = 1.0 _S__Malate_c + 1.0 Sodium_c
rxn05434	0.0462119	1.0 H__c + 1.0 6_methyl_trans_oct_2_enoyl_ACP_c + 1.0 NADH_c = 1.0 NAD__c + 1.0 6_methyl_octanoyl_ACP_c
rxn05616	0.0462073	1.0 Magnesium_e = 1.0 Magnesium_c
rxn04602	0.0460572	1.0 H__c + 1.0 NADH_c + 1.0 3_Coumaric_acid_c + 1.0 Oxygen_c = 1.0 trans_2_3_Dihydroxycinnamate_c + 1.0 NAD__c + 1.0 H2O_c
rxn04601	0.0460572	1.0 H__c + 1.0 NADH_c + 1.0 3__3_Hydroxy_phenyl__propanoic_acid_c + 1.0 Oxygen_c = 1.0 NAD__c + 1.0 H2O_c + 1.0 3__2_3_Dihydroxyphenyl_propanoate_c
rxn00529	0.0460572	1.0 H__c + 1.0 L_Tyrosine_c = 1.0 CO2_c + 1.0 Tyramine_c
rxn00497	0.0460572	1.0 H__c + 1.0 L_Phenylalanine_c = 1.0 CO2_c + 1.0 Phenethylamine_c
rxn00484	0.0460572	1.0 L_Tryptophan_c + 1.0 H__c = 1.0 CO2_c + 1.0 Tryptamine_c
t_cpd00211	0.0457912	1.0 Butanoic_acid_e + 1.0 H__e = 1.0 Butanoic_acid_c + 1.0 H__c
t_cpd00142	0.0457912	1.0 Acetoacetate_e + 1.0 H__e = 1.0 H__c + 1.0 Acetoacetate_c
rxn05683	0.0457912	1.0 Butanoic_acid_e + 1.0 H__e = 1.0 Butanoic_acid_c + 1.0 H__c
rxn05484	0.0457912	1.0 Acetoacetate_e + 1.0 H__e = 1.0 H__c + 1.0 Acetoacetate_c
rxn01145	0.045479	1.0 H2O_c + 1.0 dTMP_c = 1.0 Thymidine_c + 1.0 H__c + 1.0 Orthophosphate_c
rxn02760	0.0447709	1.0 H2O_c + 1.0 Sucrose_6_phosphate_c = 1.0 D_Glucose_6_phosphate_c + 1.0 D_Fructose_c
rxn01737	0.0447709	1.0 Raffinose_c + 1.0 H2O_c = 1.0 Melibiose_c + 1.0 D_Fructose_c
rxn04748	0.0440503	1.0 4_Methylsalicylate_c + 1.0 NADH_c + 1.0 Oxygen_c + 2.0 H__c = 1.0 NAD__c + 1.0 H2O_c + 1.0 4_Methylcatechol_c + 1.0 CO2_c
rxn04745	0.0440503	2.0 H__c + 1.0 NADH_c + 1.0 Oxygen_c + 1.0 4_Hydroxymethylsalicylate_c = 1.0 NAD__c + 1.0 4_Hydroxymethylcatechol_c + 1.0 H2O_c + 1.0 CO2_c
rxn04724	0.0440503	2.0 H__c + 1.0 NADH_c + 1.0 3_Methylsalicylate_c + 1.0 Oxygen_c = 1.0 NAD__c + 1.0 H2O_c + 1.0 CO2_c + 1.0 2_3_Dihydroxytoluene_c
rxn03906	0.0440503	2.0 H__c + 1.0 NADH_c + 1.0 1_Hydroxy_2_naphthoate_c + 1.0 Oxygen_c = 1.0 NAD__c + 1.0 H2O_c + 1.0 CO2_c + 1.0 Naphthalene_1_2_diol_c
rxn00589	0.0440503	2.0 H__c + 1.0 NADH_c + 1.0 Oxygen_c + 1.0 Salicylate_c = 1.0 NAD__c + 1.0 H2O_c + 1.0 CO2_c + 1.0 Catechol_c
rxn05435	0.0434273	1.0 H__c + 1.0 8_methyl_trans_dec_2_enoyl_ACP_c + 1.0 NADH_c = 1.0 NAD__c + 1.0 8_methyl_decanoyl_ACP_c
rxn05464	0.0429747	1.0 trans_Octodec_2_enoyl_ACP_c + 1.0 NADH_c + 1.0 H__c = 1.0 NAD__c + 1.0 Octodecanoyl_ACP_c
rxn05450	0.0429747	1.0 NADH_c + 1.0 H__c + 1.0 14_methyl_trans_pentadec_2_enoyl_ACP_c = 1.0 NAD__c + 1.0 14_methyl_pentadecanoyl_ACP_c
rxn05449	0.0429747	1.0 H__c + 1.0 12_methyl_trans_tridec_2_enoyl_ACP_c + 1.0 NADH_c = 1.0 12_methyl_tridecanoyl_ACP_c + 1.0 NAD__c
rxn05448	0.0429747	1.0 H__c + 1.0 10_methyl_trans_undec_2_enoyl_ACP_c + 1.0 NADH_c = 1.0 NAD__c + 1.0 10_methyl_undecanoyl_ACP_c
rxn05447	0.0429747	1.0 H__c + 1.0 NADH_c + 1.0 8_methyl_trans_non_2_enoyl_ACP_c = 1.0 NAD__c + 1.0 8_methyl_nonanoyl_ACP_c
rxn05446	0.0429747	1.0 H__c + 1.0 NADH_c + 1.0 6_methyl_trans_hept_2_enoyl_ACP_c = 1.0 NAD__c + 1.0 6_methyl_heptanoyl_ACP_c
rxn05445	0.0429747	1.0 4_methyl_trans_pent_2_enoyl_ACP_c + 1.0 H__c + 1.0 NADH_c = 1.0 NAD__c + 1.0 4_methyl_pentanoyl_ACP_c
rxn05328	0.0429747	1.0 trans_Hexadec_2_enoyl__acp__c + 1.0 H__c + 1.0 NADH_c = 1.0 Hexadecanoyl__acp__c + 1.0 NAD__c
rxn05327	0.0429747	1.0 trans_Dec_2_enoyl__acp__c + 1.0 H__c + 1.0 NADH_c = 1.0 Decanoyl__acp__c + 1.0 NAD__c
rxn05326	0.0429747	1.0 H__c + 1.0 trans_Hex_2_enoyl__acp__c + 1.0 NADH_c = 1.0 NAD__c + 1.0 Hexanoyl__acp__c
rxn05325	0.0429747	1.0 H__c + 1.0 trans_Oct_2_enoyl__acp__c + 1.0 NADH_c = 1.0 NAD__c + 1.0 Octanoyl__acp__c
rxn05324	0.0429747	1.0 H__c + 1.0 NADH_c + 1.0 trans_Dodec_2_enoyl__acp__c = 1.0 NAD__c + 1.0 Dodecanoyl__acyl_carrier_protein__c
rxn05322	0.0429747	1.0 But_2_enoyl__acyl_carrier_protein__c + 1.0 NADH_c + 1.0 H__c = 1.0 NAD__c + 1.0 Butyryl__acp__c
rxn00278	0.0425737	1.0 L_Alanine_c + 1.0 NAD__c + 1.0 H2O_c = 1.0 Pyruvate_c + 1.0 H__c + 1.0 NADH_c + 1.0 NH3_c
rxn12822	0.0425711	2.0 L_Glutamate_c + 2.0 Oxidized_ferredoxin_c = 1.0 L_Glutamine_c + 2.0 H__c + 1.0 2_Oxoglutarate_c + 2.0 Reduced_ferredoxin_c
rxn11544	0.0422738	2.0 L_Glutamine_c + 1.0 H2O_c + 1.0 Hydrogenobyrinate_c + 2.0 ATP_c = 2.0 ADP_c + 2.0 L_Glutamate_c + 1.0 Hydrogenobyrinate_a_c_diamide_c + 1.0 Diphosphate_c
rxn06979	0.0422738	2.0 L_Glutamine_c + 2.0 H2O_c + 1.0 Cobyrinate_c + 2.0 ATP_c = 1.0 Cob_II_yrinate_a_c_diamide_c + 2.0 H__c + 2.0 Orthophosphate_c + 2.0 L_Glutamate_c + 2.0 ADP_c
rxn04052	0.0422738	1.0 Cobalt_precorrin_8_c = 1.0 Cobyrinate_c
rxn03512	0.0422738	1.0 H__c + 1.0 Precorrin_8X_c = 1.0 Hydrogenobyrinate_c
rxn00216	0.0418434	1.0 D_Glucose_c + 1.0 ATP_c = 1.0 D_Glucose_6_phosphate_c + 1.0 ADP_c
t_cpd03724	0.0416909	1.0 H2O_c + 1.0 Ferrichrome_e + 1.0 ATP_c = 1.0 H__c + 1.0 Orthophosphate_c + 1.0 Ferrichrome_c + 1.0 ADP_c
rxn05188	0.0416909	1.0 H2O_c + 1.0 Ferrichrome_e + 1.0 ATP_c = 1.0 H__c + 1.0 Orthophosphate_c + 1.0 Ferrichrome_c + 1.0 ADP_c
rxn05444	0.0407333	1.0 H__c + 1.0 NADH_c + 1.0 15_methyl_trans_hexa_dec_2_enoyl_ACP_c = 1.0 NAD__c + 1.0 15_methyl_hexa_decanoyl_ACP_c
rxn01521	0.0405319	1.0 H2O_c + 1.0 dUMP_c = 1.0 H__c + 1.0 Orthophosphate_c + 1.0 Deoxyuridine_c
rxn02898	0.0404015	1.0 2_Succinylbenzoyl_CoA_c = 1.0 1_4_Dihydroxy_2_naphthoate_c + 1.0 CoA_c
rxn02832	0.0404015	1.0 2_Succinyl_6_hydroxy_2_4_cyclohexadiene_1_carboxylate_c = 1.0 2_Succinylbenzoate_c + 1.0 H2O_c
rxn00615	0.0403687	1.0 Glycerol_c + 1.0 ATP_c = 1.0 sn_Glycerol_3_phosphate_c + 1.0 ADP_c
rxn00702	0.0403391	1.0 CTP_c + 1.0 D_Glucose_1_phosphate_c = 1.0 CDP_glucose_c + 1.0 Diphosphate_c
rxn00656	0.0399632	1.0 L_Alanine_c + 1.0 3_Oxopropanoate_c = 1.0 Pyruvate_c + 1.0 beta_Alanine_c
rxn03954	0.0397822	1.0 L_Idonate_c + 1.0 NADP__c = 1.0 H__c + 1.0 NADPH_c + 1.0 5_Dehydro_D_gluconate_c
rxn01122	0.0397713	1.0 D_Altronate_c = 1.0 H2O_c + 1.0 2_Dehydro_3_deoxy_D_gluconate_c
rxn00338	0.0395536	1.0 L_Aspartate_c + 1.0 Oxygen_c = 1.0 H2O2_c + 1.0 Iminoaspartate_c + 1.0 H__c
rxn01068	0.0395356	1.0 L_Threonine_c + 1.0 NAD__c = 1.0 L_2_Amino_3_oxobutanoic_acid_c + 1.0 H__c + 1.0 NADH_c
rxn11944	0.0393748	1.0 5_Methyltetrahydropteroyltri_L_glutamate_c + 1.0 S_Adenosyl_L_homocysteine_c + 1.0 H__c = 1.0 S_Adenosyl_L_methionine_c + 1.0 Tetrahydropteroyltri_L_glutamate_c
rxn05614	0.0389924	1.0 H2O_c + 1.0 L_methionine_R_oxide_e + 1.0 ATP_c = 1.0 H__c + 1.0 Orthophosphate_c + 1.0 L_methionine_R_oxide_c + 1.0 ADP_c
rxn05613	0.0389924	1.0 H2O_c + 1.0 L_Methionine_S_oxide_e + 1.0 ATP_c = 1.0 H__c + 1.0 Orthophosphate_c + 1.0 L_Methionine_S_oxide_c + 1.0 ADP_c
rxn05219	0.0389924	1.0 H2O_c + 1.0 L_Methionine_e + 1.0 ATP_c = 1.0 H__c + 1.0 Orthophosphate_c + 1.0 L_Methionine_c + 1.0 ADP_c
rxn05183	0.0389924	1.0 H2O_c + 1.0 D_Methionine_e + 1.0 ATP_c = 1.0 H__c + 1.0 Orthophosphate_c + 1.0 D_Methionine_c + 1.0 ADP_c
t_cpd11576	0.0389924	1.0 H2O_c + 1.0 L_methionine_R_oxide_e + 1.0 ATP_c = 1.0 H__c + 1.0 Orthophosphate_c + 1.0 L_methionine_R_oxide_c + 1.0 ADP_c
t_cpd01914	0.0389924	1.0 H2O_c + 1.0 L_Methionine_S_oxide_e + 1.0 ATP_c = 1.0 H__c + 1.0 Orthophosphate_c + 1.0 L_Methionine_S_oxide_c + 1.0 ADP_c
t_cpd00637	0.0389924	1.0 H2O_c + 1.0 D_Methionine_e + 1.0 ATP_c = 1.0 H__c + 1.0 Orthophosphate_c + 1.0 D_Methionine_c + 1.0 ADP_c
t_cpd00060	0.0389924	1.0 H2O_c + 1.0 L_Methionine_e + 1.0 ATP_c = 1.0 H__c + 1.0 Orthophosphate_c + 1.0 L_Methionine_c + 1.0 ADP_c
rxn04413	0.0389894	1.0 Adenosyl_cobinamide_c + 1.0 GTP_c = 1.0 H__c + 1.0 GDP_c + 1.0 Adenosyl_cobinamide_phosphate_c
rxn03537	0.0389894	1.0 H__c + 1.0 GTP_c + 1.0 Adenosyl_cobinamide_phosphate_c = 1.0 Diphosphate_c + 1.0 Adenosine_GDP_cobinamide_c
rxn03536	0.0389894	1.0 Adenosyl_cobinamide_c + 1.0 ATP_c = 1.0 H__c + 1.0 Adenosyl_cobinamide_phosphate_c + 1.0 ADP_c
rxn01477	0.0389105	1.0 6_Phospho_D_gluconate_c = 1.0 H2O_c + 1.0 2_Dehydro_3_deoxy_6_phospho_D_gluconate_c
rxn08205	0.0388316	1.0 H2O_c + 1.0 CDP_1_2_dioctadec_11_enoylglycerol_c = 1.0 1_2_dioctadec_11_enoyl_sn_glycerol_3_phosphate_c + 1.0 CMP_c
rxn08204	0.0388316	1.0 CDP_1_2_dioctadecanoylglycerol_c + 1.0 H2O_c = 1.0 1_2_dioctadecanoyl_sn_glycerol_3_phosphate_c + 1.0 CMP_c
rxn08203	0.0388316	1.0 H2O_c + 1.0 CDP_1_2_dihexadec_9_enoylglycerol_c = 1.0 1_2_dihexadec_9_enoyl_sn_glycerol_3_phosphate_c + 1.0 CMP_c
rxn08202	0.0388316	1.0 H2O_c + 1.0 CDP_1_2_dihexadecanoylglycerol_c = 1.0 1_2_dihexadecanoyl_sn_glycerol_3_phosphate_c + 1.0 CMP_c
rxn08201	0.0388316	1.0 CDP_1_2_ditetradec_7_enoylglycerol_c + 1.0 H2O_c = 1.0 1_2_ditetradec_7_enoyl_sn_glycerol_3_phosphate_c + 1.0 CMP_c
rxn08200	0.0388316	1.0 H2O_c + 1.0 CDP_1_2_ditetradecanoylglycerol_c = 1.0 CMP_c + 1.0 1_2_ditetradecanoyl_sn_glycerol_3_phosphate_c
rxn08199	0.0388316	1.0 H2O_c + 1.0 CDP_1_2_didodecanoylglycerol_c = 1.0 CMP_c + 1.0 1_2_didodecanoyl_sn_glycerol_3_phosphate_c
rxn01025	0.0386611	1.0 H__c + 1.0 H2O_c + 1.0 5_Methylcytosine_c = 1.0 Thymine_c + 1.0 NH3_c
rxn00717	0.0386611	1.0 Cytosine_c + 1.0 H__c + 1.0 H2O_c = 1.0 Uracil_c + 1.0 NH3_c
rxn09067	0.0382754	1.0 1_2_dioctadecanoyl_sn_glycerol_3_phosphate_c + 1.0 H2O_c = 1.0 H__c + 1.0 Orthophosphate_c + 1.0 1_2_Diacyl_sn_glycerol_dioctadecanoyl_c
rxn08299	0.0382754	1.0 1_2_Diacyl_sn_glycerol_dioctadecanoyl_c + 1.0 ATP_c = 1.0 1_2_dioctadecanoyl_sn_glycerol_3_phosphate_c + 1.0 ADP_c
rxn05437	0.0381559	1.0 H__c + 1.0 NADH_c + 1.0 12_methyl_trans_tetra_dec_2_enoyl_ACP_c = 1.0 NAD__c + 1.0 12_methyl_tetra_decanoyl_ACP_c
rxn05579	0.0376226	1.0 Betaine_e + 1.0 H__e = 1.0 H__c + 1.0 Betaine_c
rxn05395	0.0370029	1.0 9_methyl_trans_dec_2_enoyl_ACP_c + 1.0 NADPH_c + 1.0 H__c = 1.0 9_methyl_decanoyl_ACP_c + 1.0 NADP__c
rxn02946	0.0367322	1.0 cis_4_Hydroxy_D_proline_c + 1.0 Oxygen_c = 1.0 H2O2_c + 1.0 1_Pyrroline_4_hydroxy_2_carboxylate_c
rxn02071	0.0367322	1.0 D_Proline_c + 1.0 Oxygen_c = 1.0 H2O2_c + 1.0 1_Pyrroline_2_carboxylate_c
rxn00105	0.0356697	1.0 Nicotinamide_D_ribonucleotide_c + 1.0 ATP_c = 1.0 NAD__c + 1.0 Diphosphate_c
rxn11702	0.0354525	1.0 H__c + 1.0 2_Oxoglutarate_c + 1.0 Isochorismate_c = 1.0 CO2_c + 1.0 2_Succinyl_5_enolpyruvyl_6_hydroxy_3_cyclohexene_1_carboxylate_c
rxn02297	0.0354204	1.0 L_Alanine_c + 1.0 H__c + 1.0 6_Carboxyhexanoyl_CoA_c = 1.0 CO2_c + 1.0 CoA_c + 1.0 8_Amino_7_oxononanoate_c
rxn02314	0.035334	1.0 D_Tagatose_6_phosphate_c + 1.0 ATP_c = 1.0 ADP_c + 1.0 D_Tagatose_1_6_bisphosphate_c
t_cpd04098	0.0352778	1.0 Arsenite_c = 1.0 Arsenite_e
t_cpd01048	0.0352778	1.0 Arsenic_acid_c = 1.0 Arsenic_acid_e
rxn05507	0.0352778	1.0 Arsenite_c = 1.0 Arsenite_e
rxn05506	0.0352778	1.0 Arsenic_acid_c = 1.0 Arsenic_acid_e
rxn00157	0.0347724	1.0 Acetyl_CoA_c + 1.0 Formate_c = 1.0 Pyruvate_c + 1.0 CoA_c
rxn00602	0.0345367	1.0 _R__2_Methyl_3_oxopropanoyl_CoA_c = 1.0 Succinyl_CoA_c
rxn09692	0.0344833	1.0 Choline_e + 1.0 H__e = 1.0 Choline_c + 1.0 H__c
rxn01029	0.033851	1.0 Agmatine_c + 1.0 H2O_c = 1.0 N_Carbamoylputrescine_c + 1.0 NH3_c
rxn00853	0.033851	1.0 N_Carbamoylputrescine_c + 2.0 H__c + 1.0 H2O_c = 1.0 Putrescine_c + 1.0 CO2_c + 1.0 NH3_c
rxn05438	0.0337438	1.0 H__c + 1.0 14_methyl_trans_hexa_dec_2_enoyl_ACP_c + 1.0 NADH_c = 1.0 14_methyl_hexa_decanoyl_ACP_c + 1.0 NAD__c
rxn00763	0.0335072	1.0 NAD__c + 1.0 Glycerol_c = 1.0 H__c + 1.0 NADH_c + 1.0 D_Glyceraldehyde_c
rxn00543	0.0335072	1.0 NAD__c + 1.0 Ethanol_c = 1.0 H__c + 1.0 NADH_c + 1.0 Acetaldehyde_c
rxn01871	0.0323938	1.0 Acetyl_CoA_c + 1.0 Dihydrolipoamide_c = 1.0 CoA_c + 1.0 S_Acetyldihydrolipoamide_c
rxn01107	0.0323264	1.0 D_Glucono_1_5_lactone_c + 1.0 H2O_c = 1.0 H__c + 1.0 D_Gluconic_acid_c
rxn01746	0.0322625	1.0 H2O_c + 1.0 Allantoate_c = 1.0 Urea_c + 1.0 ____Ureidoglycolate_c
rxn02400	0.0318336	1.0 H2O_c + 1.0 Nicotinate_D_ribonucleotide_c = 1.0 H__c + 1.0 Orthophosphate_c + 1.0 Nicotinate_D_ribonucleoside_c
rxn01961	0.0318336	1.0 Xanthosine_5__phosphate_c + 1.0 H2O_c = 1.0 H__c + 1.0 Orthophosphate_c + 1.0 Xanthosine_c
rxn00831	0.0318336	1.0 H2O_c + 1.0 IMP_c = 1.0 H__c + 1.0 Orthophosphate_c + 1.0 Inosine_c
rxn05443	0.0317658	1.0 13_methyl_trans_tetra_dec_2_enoyl_ACP_c + 1.0 H__c + 1.0 NADH_c = 1.0 NAD__c + 1.0 13_methyl_tetra_decanoyl_ACP_c
rxn03838	0.0313838	1.0 H2O_c + 1.0 D_Gal_alpha_1_6D_Gal_alpha_1__6D_Glucose_c = 1.0 Melibiose_c + 1.0 D_Galactose_c
rxn02596	0.0313838	1.0 H2O_c + 1.0 Stachyose_c = 1.0 Raffinose_c + 1.0 D_Galactose_c
rxn00818	0.0313838	1.0 Raffinose_c + 1.0 H2O_c = 1.0 Sucrose_c + 1.0 D_Galactose_c
rxn00817	0.0313838	1.0 H2O_c + 1.0 Melibiose_c = 1.0 D_Glucose_c + 1.0 D_Galactose_c
rxn02883	0.0309792	1.0 2_4_Dihydroxyhept_2_enedioate_c = 1.0 H2O_c + 1.0 2_Oxohept_3_enedioate_c
rxn00756	0.0306528	1.0 H2O_c + 1.0 Choline_sulfate_c = 1.0 Sulfate_c + 1.0 Choline_c + 1.0 H__c
rxn02085	0.0299783	1.0 4_Imidazolone_5_propanoate_c = 1.0 H2O_c + 1.0 Urocanate_c
rxn05517	0.0299724	1.0 Cadmium_c + 1.0 Potassium_e + 1.0 H__e = 1.0 H__c + 1.0 Potassium_c + 1.0 Cadmium_e
rxn05315	0.0299724	1.0 Potassium_e + 1.0 Zinc_c + 1.0 H__e = 1.0 Zinc_e + 1.0 H__c + 1.0 Potassium_c
rxn00331	0.0298683	1.0 _3S__3_Carboxy_3_hydroxypropanoyl_CoA_c = 1.0 Acetyl_CoA_c + 1.0 Glyoxylate_c
rxn08194	0.0298524	1.0 ATP_c + 1.0 Cob_I_alamin_c = 1.0 Cobamide_coenzyme_c + 1.0 Triphosphate_c
rxn05029	0.0298524	1.0 ATP_c + 1.0 Cobinamide_c = 1.0 Adenosyl_cobinamide_c + 1.0 Triphosphate_c
rxn03535	0.0298524	1.0 Cob_I_yrinate_a_c_diamide_c + 1.0 ATP_c = 1.0 Triphosphate_c + 1.0 Adenosyl_cobyrinate_a_c_diamide_c
rxn00577	0.0297649	1.0 Sucrose_c + 1.0 Orthophosphate_c + 1.0 H__c = 1.0 D_Fructose_c + 1.0 D_Glucose_1_phosphate_c
rxn01925	0.0297649	1.0 2_Methylpropanoyl_CoA_c + 1.0 Dihydrolipoamide_c = 1.0 S__2_Methylpropanoyl__dihydrolipoamide_c + 1.0 CoA_c
t_cpd00159	0.0297032	1.0 _S__Lactate_e + 1.0 H__e = 1.0 H__c + 1.0 _S__Lactate_c
rxn05171	0.0295828	1.0 H2O_c + 1.0 Nitrate_e + 1.0 ATP_c = 1.0 H__c + 1.0 Orthophosphate_c + 1.0 Nitrate_c + 1.0 ADP_c
rxn02222	0.0295459	1.0 _Indol_3_yl_acetamide_c + 1.0 H2O_c = 1.0 Indole_3_acetate_c + 1.0 NH3_c
rxn03060	0.0294858	1.0 2_Methylcitrate_c = 1.0 H2O_c + 1.0 _Z__But_2_ene_1_2_3_tricarboxylate_c
rxn00897	0.0294048	1.0 N_Acetyl_D_glucosamine_c = 1.0 N_Acetyl_D_mannosamine_c
rxn05440	0.0293796	1.0 7_methyl_trans_oct_2_enoyl_ACP_c + 1.0 NADH_c + 1.0 H__c = 1.0 NAD__c + 1.0 7_methyl_octanoyl_ACP_c
rxn01094	0.029263	1.0 NAD__c + 1.0 2_3_Dihydro_2_3_dihydroxybenzoate_c = 1.0 H__c + 1.0 2_3_Dihydroxybenzoate_c + 1.0 NADH_c
rxn05505	0.0290108	1.0 ARSENOBETAINE_e + 1.0 H__e = 1.0 H__c + 1.0 ARSENOBETAINE_c
t_cpd11597	0.0290108	1.0 ARSENOBETAINE_e + 1.0 H__e = 1.0 H__c + 1.0 ARSENOBETAINE_c
rxn03893	0.028082	1.0 4_Hydroxybenzoate_c + 1.0 all_trans_Octaprenyl_diphosphate_c = 1.0 Diphosphate_c + 1.0 3_Octaprenyl_4_hydroxybenzoate_c
t_cpd03279	0.0279118	1.0 Deoxyinosine_e + 1.0 H__e = 1.0 H__c + 1.0 Deoxyinosine_c
t_cpd00654	0.0279118	1.0 Deoxycytidine_e + 1.0 H__e = 1.0 H__c + 1.0 Deoxycytidine_c
t_cpd00652	0.0279118	1.0 D_Galactarate_e + 1.0 H__e = 1.0 H__c + 1.0 D_Galactarate_c
t_cpd00609	0.0279118	1.0 D_Glucarate_e + 1.0 H__e = 1.0 H__c + 1.0 D_Glucarate_c
t_cpd00516	0.0279118	1.0 H2O_c + 1.0 meso_2_6_Diaminoheptanedioate_e + 1.0 ATP_c = 1.0 H__c + 1.0 Orthophosphate_c + 1.0 meso_2_6_Diaminoheptanedioate_c + 1.0 ADP_c
t_cpd00438	0.0279118	1.0 Deoxyadenosine_e + 1.0 H__e = 1.0 H__c + 1.0 Deoxyadenosine_c
t_cpd00412	0.0279118	1.0 Deoxyuridine_e + 1.0 H__e = 1.0 H__c + 1.0 Deoxyuridine_c
t_cpd00367	0.0279118	1.0 Cytidine_e + 1.0 H__e = 1.0 H__c + 1.0 Cytidine_c
t_cpd00277	0.0279118	1.0 Deoxyguanosine_e + 1.0 H__e = 1.0 H__c + 1.0 Deoxyguanosine_c
t_cpd00249	0.0279118	1.0 Uridine_e + 1.0 H__e = 1.0 H__c + 1.0 Uridine_c
t_cpd00246	0.0279118	1.0 Inosine_e + 1.0 H__e = 1.0 H__c + 1.0 Inosine_c
t_cpd00184	0.0279118	1.0 Thymidine_e + 1.0 H__e = 1.0 Thymidine_c + 1.0 H__c
t_cpd00182	0.0279118	1.0 Adenosine_e + 1.0 H__e = 1.0 H__c + 1.0 Adenosine_c
t_cpd00041	0.0279118	1.0 L_Aspartate_e + 1.0 H__e = 1.0 H__c + 1.0 L_Aspartate_c
rxn12008	0.0279118	1.0 all_trans_Heptaprenyl_diphosphate_c + 1.0 Isopentenyl_diphosphate_c = 1.0 Diphosphate_c + 1.0 all_trans_Octaprenyl_diphosphate_c
rxn10052	0.0279118	1.0 H__c + 1.0 AMP_c + 1.0 Triphosphate_c = 1.0 Diphosphate_c + 1.0 ADP_c
rxn05312	0.0279118	1.0 H__c + 1.0 Orthophosphate_c = 1.0 Orthophosphate_e + 1.0 H__e
rxn01517	0.0279118	1.0 ATP_c + 1.0 dUMP_c = 1.0 dUDP_c + 1.0 ADP_c
rxn01127	0.0279118	1.0 dAMP_c + 1.0 ATP_c = 1.0 dADP_c + 1.0 ADP_c
rxn00283	0.0279118	1.0 L_Alanine_c = 1.0 D_Alanine_c
rxn00097	0.0279118	1.0 AMP_c + 1.0 ATP_c = 2.0 ADP_c
rxn12206	0.0279118	1.0 H__c + 1.0 Malonate_c = 1.0 CO2_c + 1.0 Acetate_c
rxn10180	0.0279118	1.0 Sodium_e + 1.0 Pantothenate_e = 1.0 Pantothenate_c + 1.0 Sodium_c
rxn09688	0.0279118	1.0 Deoxyguanosine_e + 1.0 H__e = 1.0 H__c + 1.0 Deoxyguanosine_c
rxn09687	0.0279118	1.0 Deoxyinosine_e + 1.0 H__e = 1.0 H__c + 1.0 Deoxyinosine_c
rxn09685	0.0279118	1.0 Deoxyuridine_e + 1.0 H__e = 1.0 H__c + 1.0 Deoxyuridine_c
rxn05572	0.0279118	1.0 D_Glucarate_e + 1.0 H__e = 1.0 H__c + 1.0 D_Glucarate_c
rxn05565	0.0279118	1.0 D_Galactarate_e + 1.0 H__e = 1.0 H__c + 1.0 D_Galactarate_c
rxn05564	0.0279118	1.0 4_Aminobutanoate_e + 1.0 H__e = 1.0 H__c + 1.0 4_Aminobutanoate_c
rxn05318	0.0279118	1.0 Adenosine_e + 1.0 H__e = 1.0 H__c + 1.0 Adenosine_c
rxn05317	0.0279118	1.0 Deoxyadenosine_e + 1.0 H__e = 1.0 H__c + 1.0 Deoxyadenosine_c
rxn05316	0.0279118	1.0 Inosine_e + 1.0 H__e = 1.0 H__c + 1.0 Inosine_c
rxn05217	0.0279118	1.0 L_Aspartate_e + 1.0 H__e = 1.0 H__c + 1.0 L_Aspartate_c
rxn05205	0.0279118	1.0 Deoxycytidine_e + 1.0 H__e = 1.0 H__c + 1.0 Deoxycytidine_c
rxn05200	0.0279118	1.0 Thymidine_e + 1.0 H__e = 1.0 Thymidine_c + 1.0 H__c
rxn05199	0.0279118	1.0 Uridine_e + 1.0 H__e = 1.0 H__c + 1.0 Uridine_c
rxn05198	0.0279118	1.0 Cytidine_e + 1.0 H__e = 1.0 H__c + 1.0 Cytidine_c
rxn04938	0.0279118	1.0 S__Hydroxymethyl_glutathione_c + 1.0 NADP__c = 1.0 H__c + 1.0 S_Formylglutathione_c + 1.0 NADPH_c
rxn04139	0.0279118	1.0 2_Octaprenyl_3_methyl_6_methoxy_1_4_benzoquinone_c + 1.0 NADPH_c + 1.0 Oxygen_c = 1.0 H2O_c + 1.0 NADP__c + 1.0 2_Octaprenyl_3_methyl_5_hydroxy_6_methoxy_1_4_benzoquinone_c
rxn03159	0.0279118	1.0 UDP_2_3_bis_3_hydroxytetradecanoyl_glucosamine_c + 1.0 2_3_Bis_3_hydroxytetradecanoyl__beta_D_glucosaminyl_1_phosphate_c = 1.0 UDP_c + 1.0 2_3_2__3__Tetrakis_3_hydroxytetradecanoyl__D_glucosaminyl_1_6_beta__D_glucosamine_1_phosphate_c
rxn02346	0.0279118	1.0 Pyruvate_c + 1.0 2_Hydroxy_3_oxopropanoate_c = 1.0 2_Dehydro_3_deoxy_D_glucarate_c
rxn01990	0.0279118	1.0 5_Dehydro_4_deoxy_D_glucarate_c = 1.0 Pyruvate_c + 1.0 2_Hydroxy_3_oxopropanoate_c
rxn01986	0.0279118	1.0 2_Deoxy_D_ribose_1_phosphate_c = 1.0 2_Deoxy_D_ribose_5_phosphate_c
rxn01840	0.0279118	1.0 NAD__c + 1.0 H2O_c + 1.0 Phenylacetaldehyde_c = 1.0 H__c + 1.0 NADH_c + 1.0 Phenyl_acetate_c
rxn01830	0.0279118	1.0 H2O_c + 1.0 L_Arabinono_1_4_lactone_c = 1.0 H__c + 1.0 L_Arabinonate_c
rxn01709	0.0279118	1.0 Propane_1_2_diol_c = 1.0 Propanal_c + 1.0 H2O_c
rxn01508	0.0279118	1.0 Deoxyadenosine_c + 1.0 ATP_c = 1.0 dAMP_c + 1.0 ADP_c
rxn01423	0.0279118	1.0 2_Oxoglutarate_c + 1.0 L_2_Aminoadipate_c = 1.0 L_Glutamate_c + 1.0 2_Oxoadipate_c
rxn01277	0.0279118	1.0 D_Gluconic_acid_c + 1.0 NADP__c = 1.0 H__c + 1.0 NADPH_c + 1.0 2_Keto_D_gluconic_acid_c
rxn01117	0.0279118	1.0 D_Arabinose_5_phosphate_c = 1.0 D_Ribulose_5_phosphate_c
rxn00914	0.0279118	1.0 ATP_c + 1.0 Guanosine_c = 1.0 GMP_c + 1.0 ADP_c
rxn00856	0.0279118	1.0 Putrescine_c + 1.0 2_Oxoglutarate_c = 1.0 L_Glutamate_c + 1.0 4_Aminobutyraldehyde_c
rxn00779	0.0279118	1.0 H2O_c + 1.0 D_Glyceraldehyde_3_phosphate_c + 1.0 NADP__c = 2.0 H__c + 1.0 NADPH_c + 1.0 3_Phospho_D_glycerate_c
rxn00778	0.0279118	1.0 alpha_D_Ribose_1_phosphate_c = 1.0 D_Ribose_5_phosphate_c
rxn00638	0.0279118	1.0 GDP_mannose_c + 2.0 NAD__c + 1.0 H2O_c = 3.0 H__c + 2.0 NADH_c + 1.0 GDP_D_mannuronate_c
t_cpd00220	0.0275975	1.0 Riboflavin_e + 1.0 H__e = 1.0 H__c + 1.0 Riboflavin_c
rxn10806	0.0275975	2.0 H__c + 0.5 Oxygen_c + 1.0 Menaquinol_8_c = 1.0 H2O_c + 1.0 Menaquinone_8_c + 2.0 H__e
rxn10094	0.0275975	1.0 S_Adenosyl_L_methionine_c + 1.0 2_Demethylmenaquinone_8_c = 1.0 H__c + 1.0 Menaquinone_8_c + 1.0 S_Adenosyl_L_homocysteine_c
rxn10043	0.0275975	6.0 H__c + 2.0 Ferrocytochrome_c_c + 0.5 Oxygen_c = 1.0 H2O_c + 2.0 Ferricytochrome_c_c + 4.0 H__e
rxn08976	0.0275975	1.0 H__c + 1.0 2_Demethylmenaquinone_8_c + 1.0 NADH_c = 1.0 NAD__c + 1.0 2_Demethylmenaquinol_8_c
rxn08975	0.0275975	1.0 H__c + 1.0 NADH_c + 1.0 Ubiquinone_8_c = 1.0 NAD__c + 1.0 Ubiquinol_8_c
rxn08971	0.0275975	1.0 H__c + 1.0 Menaquinone_8_c + 1.0 NADH_c = 1.0 NAD__c + 1.0 Menaquinol_8_c
rxn08707	0.0275975	1.0 H2O_c + 1.0 trans_trans_Farnesyl_diphosphate_c + 1.0 Heme_c = 1.0 Diphosphate_c + 1.0 Heme_O_c
rxn04674	0.0275975	1.0 S_Adenosyl_L_methionine_c + 1.0 2_Phytyl_1_4_naphthoquinone_c = 1.0 Phylloquinone_c + 1.0 H__c + 1.0 S_Adenosyl_L_homocysteine_c
rxn03397	0.0275975	1.0 2_Octaprenyl_6_methoxy_1_4_benzoquinone_c + 1.0 S_Adenosyl_L_methionine_c = 1.0 H__c + 1.0 2_Octaprenyl_3_methyl_6_methoxy_1_4_benzoquinone_c + 1.0 S_Adenosyl_L_homocysteine_c
rxn03384	0.0275975	4.0 H__c + 1.0 Uroporphyrinogen_I_c = 4.0 CO2_c + 1.0 Coproporphyrinogen_I_c
rxn03004	0.0275975	1.0 10_Formyltetrahydrofolate_c + 1.0 5__Phosphoribosylglycinamide_c = 1.0 5__Phosphoribosyl_N_formylglycinamide_c + 1.0 H__c + 1.0 Tetrahydrofolate_c
rxn02342	0.0275975	1.0 Lipoamide_c + 1.0 2__alpha_Hydroxyethyl_thiamine_diphosphate_c = 1.0 Thiamin_diphosphate_c + 1.0 S_Acetyldihydrolipoamide_c
rxn01678	0.0275975	1.0 dUDP_c + 1.0 ATP_c = 1.0 dUTP_c + 1.0 ADP_c
rxn01673	0.0275975	1.0 ATP_c + 1.0 dCDP_c = 1.0 ADP_c + 1.0 dCTP_c
rxn01512	0.0275975	1.0 dTDP_c + 1.0 ATP_c = 1.0 dTTP_c + 1.0 ADP_c
rxn01353	0.0275975	1.0 dGDP_c + 1.0 ATP_c = 1.0 dGTP_c + 1.0 ADP_c
rxn01343	0.0275975	1.0 Sedoheptulose_7_phosphate_c + 1.0 ATP_c = 1.0 Sedoheptulose_1_7_bisphosphate_c + 1.0 ADP_c
rxn00839	0.0275975	1.0 dADP_c + 1.0 ATP_c = 1.0 dATP_c + 1.0 ADP_c
rxn00799	0.0275975	1.0 _S__Malate_c = 1.0 H2O_c + 1.0 Fumarate_c
rxn00515	0.0275975	1.0 ATP_c + 1.0 IDP_c = 1.0 ADP_c + 1.0 ITP_c
rxn00058	0.0275975	4.0 H__c + 4.0 Ferrocytochrome_c_c + 1.0 Oxygen_c = 2.0 H2O_c + 4.0 Ferricytochrome_c_c
rxn05645	0.0275975	1.0 Riboflavin_e + 1.0 H__e = 1.0 H__c + 1.0 Riboflavin_c
rxn01615	0.0275975	1.0 NAD__c + 1.0 Propane_1_2_diol_c = 1.0 H__c + 1.0 NADH_c + 1.0 _S__Lactaldehyde_c
rxn09953	0.0274989	1.0 NAD__c + 1.0 Acetoin_c + 1.0 CoA_c = 1.0 H__c + 1.0 NADH_c + 1.0 Acetyl_CoA_c + 1.0 Acetaldehyde_c
rxn00470	0.0270984	1.0 H__c + 1.0 L_Ornithine_c = 1.0 Putrescine_c + 1.0 CO2_c
rxn10014	0.0267367	1.0 trans_Tetradec_2_enoyl_CoA_c + 1.0 H__c + 1.0 NADH_c = 1.0 NAD__c + 1.0 Tetradecanoyl_CoA_c
rxn10013	0.0267367	1.0 H__c + 1.0 NADH_c + 1.0 2_trans_Dodecenoyl_CoA_c = 1.0 NAD__c + 1.0 Lauroyl_CoA_c
rxn10012	0.0267367	1.0 H__c + 1.0 NADH_c + 1.0 trans_Dec_2_enoyl_CoA_c = 1.0 NAD__c + 1.0 Decanoyl_CoA_c
rxn10010	0.0267367	1.0 H__c + 1.0 trans_Hex_2_enoyl_CoA_c + 1.0 NADH_c = 1.0 NAD__c + 1.0 Hexanoyl_CoA_c
rxn01972	0.0266958	1.0 H2O_c + 1.0 N6_Acetyl_LL_2_6_diaminoheptanedioate_c = 1.0 Acetate_c + 1.0 LL_2_6_Diaminoheptanedioate_c
rxn02168	0.0265229	1.0 _R__3_Hydroxybutanoyl_CoA_c = 1.0 H2O_c + 1.0 Crotonoyl_CoA_c
rxn01121	0.0261016	1.0 D_Gluconic_acid_c = 1.0 H2O_c + 1.0 2_Dehydro_3_deoxy_D_gluconate_c
rxn00206	0.0258834	2.0 O2___c = 1.0 H2O2_c + 1.0 Oxygen_c
rxn10123	0.0258117	3.0 H__c + 1.0 Menaquinone_8_c + 1.0 NADH_c = 1.0 NAD__c + 1.0 Menaquinol_8_c + 2.0 H__e
rxn01278	0.0257075	1.0 D_Gluconic_acid_c + 1.0 NADP__c = 1.0 H__c + 1.0 NADPH_c + 1.0 5_Dehydro_D_gluconate_c
rxn05298	0.0255092	1.0 Sodium_e + 1.0 L_Glutamate_e = 1.0 L_Glutamate_c + 1.0 Sodium_c
rxn00471	0.0252821	1.0 L_Ornithine_c = 1.0 H__c + 1.0 L_Proline_c + 1.0 NH3_c
rxn03055	0.0249388	1.0 NAD__c + 1.0 H2O_c + 1.0 2_Hydroxy_5_carboxymethylmuconate_semialdehyde_c = 2.0 H__c + 1.0 NADH_c + 1.0 5_Carboxymethyl_2_hydroxymuconate_c
rxn09188	0.0248199	1.0 L_Proline_c + 1.0 FAD_c = 1.0 _S__1_Pyrroline_5_carboxylate_c + 1.0 FADH2_c
rxn02359	0.0248199	1.0 trans_4_Hydroxy_L_proline_c + 1.0 FAD_c = 1.0 L_1_Pyrroline_3_hydroxy_5_carboxylate_c + 1.0 FADH2_c
rxn00503	0.0248199	1.0 _S__1_Pyrroline_5_carboxylate_c + 1.0 NAD__c + 2.0 H2O_c = 1.0 H__c + 1.0 L_Glutamate_c + 1.0 NADH_c
rxn05439	0.0244512	1.0 H__c + 1.0 5_methyl_trans_hex_2_enoyl_ACP_c + 1.0 NADH_c = 1.0 NAD__c + 1.0 5_methyl_hexanoyl_ACP_c
rxn01602	0.0239971	1.0 Dihydrofolate_c + 1.0 NADP__c = 1.0 H__c + 1.0 NADPH_c + 1.0 Folate_c
rxn00161	0.023938	1.0 _S__Malate_c + 1.0 NADP__c = 1.0 Pyruvate_c + 1.0 CO2_c + 1.0 NADPH_c
rxn01671	0.0238041	1.0 N_Ribosylnicotinamide_c + 1.0 ATP_c = 1.0 Nicotinamide_D_ribonucleotide_c + 1.0 ADP_c
rxn01640	0.0234822	1.0 H2O_c + 1.0 N_Formimino_L_glutamate_c = 1.0 N_Formyl_L_glutamate_c + 1.0 NH3_c
rxn01504	0.0233956	1.0 _S__3_Hydroxy_3_methylglutaryl_CoA_c = 1.0 3_Methylglutaconyl_CoA_c + 1.0 H2O_c
rxn01169	0.0227839	1.0 beta_D_Glucose_c + 1.0 ATP_c = 1.0 beta_D_Glucose_6_phosphate_c + 1.0 ADP_c
rxn04712	0.0226163	1.0 Fumarate_c + 1.0 2_Methylnaphthalene_c = 1.0 Naphthyl_2_methyl_succinic_acid_c
rxn04454	0.0226163	1.0 Isochorismate_c = 1.0 Pyruvate_c + 1.0 Salicylate_c
rxn00541	0.0224355	1.0 L_Threonine_c = 1.0 Acetaldehyde_c + 1.0 Glycine_c
rxn01316	0.02181	1.0 H2O_c + 1.0 Phosphoenolpyruvate_c + 1.0 N_Acetyl_D_mannosamine_c = 1.0 H__c + 1.0 Orthophosphate_c + 1.0 N_Acetylneuraminate_c
rxn00827	0.02181	1.0 CTP_c + 1.0 N_Acetylneuraminate_c = 1.0 Diphosphate_c + 1.0 CMP_N_acetylneuraminate_c
rxn01146	0.0216303	1.0 Thymidine_c + 1.0 H__c + 1.0 Orthophosphate_c = 1.0 Thymine_c + 1.0 2_Deoxy_D_ribose_1_phosphate_c
rxn03869	0.0212884	1.0 H2O_c + 1.0 Benzamide_c = 1.0 NH3_c + 1.0 Benzoate_c
rxn03839	0.0212884	1.0 H2O_c + 1.0 Acrylamide_c = 1.0 Propenoate_c + 1.0 NH3_c
rxn02275	0.0212884	1.0 4_Guanidinobutanamide_c + 1.0 H2O_c = 1.0 4_Guanidinobutanoate_c + 1.0 NH3_c
rxn01843	0.0212884	1.0 H__c + 1.0 H2O_c + 1.0 2_Phenylacetamide_c = 1.0 Phenyl_acetate_c + 1.0 NH3_c
rxn00231	0.0212884	1.0 H2O_c + 1.0 Acetamide_c = 1.0 NH3_c + 1.0 Acetate_c
rxn00606	0.0210003	1.0 H2O_c + 1.0 alpha_alpha__Trehalose_6_phosphate_c = 1.0 D_Glucose_c + 1.0 D_Glucose_6_phosphate_c
rxn00127	0.0210003	1.0 H__c + 1.0 S_Adenosyl_L_methionine_c = 1.0 S_Adenosylmethioninamine_c + 1.0 CO2_c
rxn01923	0.0209146	2.0 2_Methylpropanoyl_CoA_c + 1.0 Oxygen_c = 2.0 2_Methylprop_2_enoyl_CoA_c + 2.0 H2O_c
rxn00539	0.0208029	1.0 Ethanolamine_c = 1.0 Acetaldehyde_c + 1.0 NH3_c
rxn00679	0.0206361	1.0 Propanoyl_CoA_c + 1.0 H2O_c + 1.0 Oxaloacetate_c = 1.0 H__c + 1.0 CoA_c + 1.0 2_Methylcitrate_c
rxn04047	0.0204689	1.0 S_Adenosyl_L_methionine_c + 1.0 Cobalt_precorrin_3_c = 1.0 H__c + 1.0 S_Adenosyl_L_homocysteine_c + 1.0 Cobalt_precorrin_4_c
rxn04046	0.0204689	1.0 S_Adenosyl_L_methionine_c + 1.0 Cobalt_precorrin_2_c = 1.0 H__c + 1.0 Cobalt_precorrin_3_c + 1.0 S_Adenosyl_L_homocysteine_c
rxn03513	0.0204689	1.0 Precorrin_3B_c + 1.0 S_Adenosyl_L_methionine_c = 2.0 H__c + 1.0 Precorrin_4_c + 1.0 S_Adenosyl_L_homocysteine_c
rxn02775	0.0204689	1.0 Precorrin_2_c + 1.0 H__c + 1.0 S_Adenosyl_L_methionine_c = 1.0 S_Adenosyl_L_homocysteine_c + 1.0 Precorrin_3A_c
rxn05461	0.0201997	1.0 3_Oxooctodecanoyl_ACP_c + 1.0 H__c + 1.0 NADPH_c = 1.0 3_Hydroxyoctodecanoyl_ACP_c + 1.0 NADP__c
rxn05430	0.0201997	1.0 H__c + 1.0 NADPH_c + 1.0 14_methyl_3_oxo_pentadecanoyl_ACP_c = 1.0 14_methyl_3_hydroxy_pentadecanoyl_ACP_c + 1.0 NADP__c
rxn05426	0.0201997	1.0 12_methyl_3_oxo_tridecanoyl_ACP_c + 1.0 NADPH_c + 1.0 H__c = 1.0 12_methyl_3_hydroxy_tridecanoyl_ACP_c + 1.0 NADP__c
rxn05422	0.0201997	1.0 H__c + 1.0 NADPH_c + 1.0 10_methyl_3_oxo_undecanoyl_ACP_c = 1.0 10_methyl_3_hydroxy_undecanoyl_ACP_c + 1.0 NADP__c
rxn05418	0.0201997	1.0 H__c + 1.0 NADPH_c + 1.0 8_methyl_3_oxo_nonanoyl_ACP_c = 1.0 8_methyl_3_hydroxy_nonanoyl_ACP_c + 1.0 NADP__c
rxn05414	0.0201997	1.0 H__c + 1.0 NADPH_c + 1.0 6_methyl_3_oxo_heptanoyl_ACP_c = 1.0 6_methyl_3_hydroxy_heptanoyl_ACP_c + 1.0 NADP__c
rxn05410	0.0201997	1.0 H__c + 1.0 NADPH_c + 1.0 4_methyl_3_oxo_pentanoyl_ACP_c = 1.0 4_methyl_3_hydroxy_pentanoyl_ACP_c + 1.0 NADP__c
rxn05342	0.0201997	1.0 _3R__3_Hydroxytetradecanoyl__acyl_carrier_protein__c + 1.0 NADP__c = 1.0 3_Oxotetradecanoyl__acp__c + 1.0 H__c + 1.0 NADPH_c
rxn05341	0.0201997	1.0 _3R__3_Hydroxyoctanoyl__acyl_carrier_protein__c + 1.0 NADP__c = 1.0 H__c + 1.0 NADPH_c + 1.0 3_Oxooctanoyl__acp__c
rxn05340	0.0201997	1.0 _R__3_Hydroxydodecanoyl__acp__c + 1.0 NADP__c = 1.0 H__c + 1.0 3_Oxododecanoyl__acp__c + 1.0 NADPH_c
rxn05339	0.0201997	1.0 NADP__c + 1.0 _3R__3_Hydroxybutanoyl__acyl_carrier_protein__c = 1.0 H__c + 1.0 NADPH_c + 1.0 Acetoacetyl__acp__c
rxn05338	0.0201997	1.0 _3R__3_Hydroxydecanoyl__acyl_carrier_protein__c + 1.0 NADP__c = 1.0 H__c + 1.0 3_Oxodecanoyl__acp__c + 1.0 NADPH_c
rxn05337	0.0201997	1.0 _R__3_Hydroxyhexanoyl__acp__c + 1.0 NADP__c = 1.0 H__c + 1.0 NADPH_c + 1.0 3_Oxohexanoyl__acp__c
rxn05336	0.0201997	1.0 _3R__3_Hydroxypalmitoyl__acyl_carrier_protein__c + 1.0 NADP__c = 1.0 H__c + 1.0 3_Oxohexadecanoyl__acp__c + 1.0 NADPH_c
rxn03040	0.0199102	1.0 5_Carboxymethyl_2_hydroxymuconate_c = 1.0 5_Carboxy_2_oxohept_3_enedioate_c
rxn01672	0.0198032	1.0 H__c + 1.0 H2O_c + 1.0 dCTP_c = 1.0 dUTP_c + 1.0 NH3_c
rxn00407	0.0198032	1.0 CTP_c + 1.0 H__c + 1.0 H2O_c = 1.0 UTP_c + 1.0 NH3_c
rxn01203	0.0197613	1.0 2_4_Dihydroxyhept_2_enedioate_c = 1.0 Pyruvate_c + 1.0 Succinate_semialdehyde_c
rxn08655	0.0194983	1.0 Glycolate_c + 1.0 Ubiquinone_8_c = 1.0 Glyoxylate_c + 1.0 Ubiquinol_8_c
t_cpd00305	0.0192975	1.0 H2O_c + 1.0 Thiamine_e + 1.0 ATP_c = 1.0 H__c + 1.0 Orthophosphate_c + 1.0 Thiamine_c + 1.0 ADP_c
rxn03085	0.0192099	1.0 5_10_Methylenetetrahydromethanopterin_c + 1.0 Reduced_coenzyme_F420_c = 1.0 Coenzyme_F420_c + 1.0 5_Methyl_5_6_7_8_tetrahydromethanopterin_c
rxn01522	0.0191651	1.0 NAD__c + 1.0 Xanthine_c + 1.0 H2O_c = 1.0 H__c + 1.0 Urate_c + 1.0 NADH_c
rxn01292	0.0191471	1.0 L_Arabinose_c = 1.0 L_Ribulose_c
rxn00548	0.0191211	1.0 H__c + 1.0 Orthophosphate_c + 1.0 D_Fructose_6_phosphate_c = 1.0 H2O_c + 1.0 Acetyl_phosphate_c + 1.0 D_Erythrose_4_phosphate_c
rxn00184	0.0187966	1.0 H2O_c + 1.0 L_Glutamate_c + 1.0 NADP__c = 1.0 H__c + 1.0 2_Oxoglutarate_c + 1.0 NADPH_c + 1.0 NH3_c
rxn00966	0.0185378	1.0 Chorismate_c = 1.0 Pyruvate_c + 1.0 4_Hydroxybenzoate_c
t_cpd00098	0.018309	1.0 Choline_e + 1.0 H__e = 1.0 Choline_c + 1.0 H__c
rxn01996	0.0179609	1.0 _R__2_Methyl_3_oxopropanoyl_CoA_c = 1.0 _S__2_Methyl_3_oxopropanoyl_CoA_c
rxn10476	0.0179028	1.0 H2O_c + 1.0 Hydrogenobyrinate_a_c_diamide_c + 1.0 ATP_c + 1.0 Cobalt_c = 1.0 Cob_II_yrinate_a_c_diamide_c + 2.0 H__c + 1.0 Orthophosphate_c + 1.0 ADP_c
rxn08179	0.0179028	1.0 d_biotin_d_sulfoxide_c + 1.0 NADPH_c + 1.0 H__c = 1.0 Biotin_c + 1.0 H2O_c + 1.0 NADP__c
rxn08178	0.0179028	1.0 d_biotin_d_sulfoxide_c + 1.0 NADH_c + 1.0 H__c = 1.0 NAD__c + 1.0 Biotin_c + 1.0 H2O_c
rxn06729	0.0179028	1.0 UDP_N_acetyl_D_glucosamine_c + 1.0 _3R__3_Hydroxytetradecanoyl__acyl_carrier_protein__c = 1.0 UDP_3_O__3_hydroxytetradecanoyl__N_acetylglucosamine_c + 1.0 Acyl_carrier_protein_c
rxn00623	0.0179028	1.0 Sulfite_c + 3.0 NADPH_c + 4.0 H__c = 3.0 H2O_c + 1.0 Hydrogen_sulfide_c + 3.0 NADP__c
rxn00190	0.0176685	1.0 Deamino_NAD__c + 1.0 L_Glutamine_c + 1.0 H2O_c + 1.0 ATP_c = 1.0 NAD__c + 1.0 Diphosphate_c + 1.0 L_Glutamate_c + 1.0 AMP_c
rxn05335	0.0175198	1.0 _3R__3_Hydroxytetradecanoyl__acyl_carrier_protein__c = 1.0 trans_Tetradec_2_enoyl__acp__c + 1.0 H2O_c
rxn05333	0.0175198	1.0 _3R__3_Hydroxydecanoyl__acyl_carrier_protein__c = 1.0 trans_Dec_2_enoyl__acp__c + 1.0 H2O_c
rxn05331	0.0175198	1.0 _R__3_Hydroxydodecanoyl__acp__c = 1.0 H2O_c + 1.0 trans_Dodec_2_enoyl__acp__c
rxn01819	0.0173436	1.0 H2O_c + 1.0 Nomega_Nomega__Dimethyl_L_arginine_c = 1.0 L_Citrulline_c + 1.0 Dimethylamine_c
t_cpd00154	0.0170657	1.0 H2O_c + 1.0 ATP_c + 1.0 D_Xylose_e = 1.0 D_Xylose_c + 1.0 Orthophosphate_c + 1.0 ADP_c + 1.0 H__c
rxn05167	0.0170657	1.0 H2O_c + 1.0 ATP_c + 1.0 D_Xylose_e = 1.0 D_Xylose_c + 1.0 Orthophosphate_c + 1.0 ADP_c + 1.0 H__c
rxn00006	0.0170012	2.0 H2O2_c = 2.0 H2O_c + 1.0 Oxygen_c
rxn02344	0.0165017	1.0 _3S__3_6_Diaminohexanoate_c = 1.0 _3S_5S__3_5_Diaminohexanoate_c
rxn00836	0.0164943	1.0 5_Phospho_alpha_D_ribose_1_diphosphate_c + 1.0 Hypoxanthine_c = 1.0 Diphosphate_c + 1.0 IMP_c
rxn01654	0.0164905	1.0 5_Formiminotetrahydrofolate_c + 2.0 H__c = 1.0 5_10_Methenyltetrahydrofolate_c + 1.0 NH3_c
rxn00883	0.0163513	1.0 H2O_c + 1.0 1D_myo_Inositol_3_phosphate_c = 1.0 H__c + 1.0 Orthophosphate_c + 1.0 myo_Inositol_c
rxn00882	0.0163513	1.0 H2O_c + 1.0 myo_Inositol_4_phosphate_c = 1.0 H__c + 1.0 Orthophosphate_c + 1.0 myo_Inositol_c
rxn00881	0.0163513	1.0 H2O_c + 1.0 Inositol_1_phosphate_c = 1.0 H__c + 1.0 Orthophosphate_c + 1.0 myo_Inositol_c
t_cpd00309	0.0162826	1.0 Xanthine_e + 1.0 H__e = 1.0 Xanthine_c + 1.0 H__c
rxn05202	0.0162826	1.0 Xanthine_e + 1.0 H__e = 1.0 Xanthine_c + 1.0 H__c
rxn01870	0.016079	1.0 D_Fructose_1_phosphate_c = 1.0 Glycerone_phosphate_c + 1.0 D_Glyceraldehyde_c
rxn06586	0.0156954	1.0 3_Methylbutanoyl_CoA_c + 1.0 Dihydrolipoamide_c = 1.0 CoA_c + 1.0 _Dihydrolipoyllysine_residue__2_methylpropanoyl_transferase__S__3_methylbutanoyl_dihydrolipoyllysine_c
rxn06335	0.0156954	1.0 2_Methylbutanoyl_CoA_c + 1.0 Dihydrolipoamide_c = 1.0 CoA_c + 1.0 _Dihydrolipoyllysine_residue__2_methylpropanoyl_transferase__S__2_methylbutanoyl_dihydrolipoyllysine_c
rxn12500	0.0156791	1.0 Ubiquinone_8_c + 1.0 tricarballylate_c = 1.0 Ubiquinol_8_c + 1.0 cis_Aconitate_c
rxn00274	0.0153995	1.0 Acetyl_CoA_c + 1.0 Glycine_c = 1.0 L_2_Amino_3_oxobutanoic_acid_c + 1.0 CoA_c
rxn01868	0.0152422	1.0 H2O_c + 1.0 Betaine_aldehyde_c + 1.0 NADP__c = 2.0 H__c + 1.0 NADPH_c + 1.0 Betaine_c
rxn10372	0.0151216	1.0 2_Acyl_sn_glycero_3_phosphoethanolamine_octadecanoyl_c + 1.0 H2O_c = 1.0 H__c + 1.0 sn_glycero_3_Phosphoethanolamine_c + 1.0 ocdca_c
rxn10371	0.0151216	1.0 2_octadecanoyl_sn_glycerol_3_phosphate_c + 1.0 H2O_c = 1.0 H__c + 1.0 sn_Glycerol_3_phosphate_c + 1.0 ocdca_c
rxn10370	0.0151216	1.0 H2O_c + 1.0 1_Acyl_sn_glycero_3_phosphoglycerol_octadecanoyl_c = 1.0 H__c + 1.0 Glycerophosphoglycerol_c + 1.0 ocdca_c
rxn10369	0.0151216	1.0 H__c + 1.0 H2O_c + 1.0 1_Acyl_sn_glycero_3_phosphoethanolamine_c = 1.0 sn_glycero_3_Phosphoethanolamine_c + 1.0 ocdca_c
rxn10368	0.0151216	1.0 1_octadecanoyl_sn_glycerol_3_phosphate_c + 1.0 H2O_c = 1.0 H__c + 1.0 sn_Glycerol_3_phosphate_c + 1.0 ocdca_c
rxn08851	0.0151216	1.0 2_Acyl_sn_glycero_3_phosphoglycerol_octadec_11_enoyl_c + 1.0 H2O_c = 1.0 H__c + 1.0 octadecenoate_c + 1.0 Glycerophosphoglycerol_c
rxn08850	0.0151216	1.0 H2O_c + 1.0 2_Acyl_sn_glycero_3_phosphoglycerol_octadecanoyl_c = 1.0 H__c + 1.0 Octadecanoic_acid_c + 1.0 Glycerophosphoglycerol_c
rxn08849	0.0151216	1.0 H2O_c + 1.0 2_Acyl_sn_glycero_3_phosphoglycerol_hexadec_9_enoyl_c = 1.0 hexadecenoate_c + 1.0 Glycerophosphoglycerol_c + 1.0 H__c
rxn08848	0.0151216	1.0 2_Acyl_sn_glycero_3_phosphoglycerol_hexadecanoyl_c + 1.0 H2O_c = 1.0 Hexadecanoic_acid_c + 1.0 Glycerophosphoglycerol_c + 1.0 H__c
rxn08847	0.0151216	1.0 H2O_c + 1.0 2_Acyl_sn_glycero_3_phosphoglycerol_tetradec_7_enoyl_c = 1.0 H__c + 1.0 tetradecenoate_c + 1.0 Glycerophosphoglycerol_c
rxn08846	0.0151216	1.0 2_Acyl_sn_glycero_3_phosphoglycerol_tetradecanoyl_c + 1.0 H2O_c = 1.0 H__c + 1.0 Tetradecanoic_acid_c + 1.0 Glycerophosphoglycerol_c
rxn08845	0.0151216	1.0 2_Acyl_sn_glycero_3_phosphoglycerol_dodecanoyl_c + 1.0 H2O_c = 1.0 H__c + 1.0 Dodecanoic_acid_c + 1.0 Glycerophosphoglycerol_c
rxn08844	0.0151216	1.0 H2O_c + 1.0 2_Acyl_sn_glycero_3_phosphoethanolamine_octadec_11_enoyl_c = 1.0 octadecenoate_c + 1.0 sn_glycero_3_Phosphoethanolamine_c + 1.0 H__c
rxn08843	0.0151216	1.0 2_Acyl_sn_glycero_3_phosphoethanolamine_octadecanoyl_c + 1.0 H2O_c = 1.0 H__c + 1.0 Octadecanoic_acid_c + 1.0 sn_glycero_3_Phosphoethanolamine_c
rxn08842	0.0151216	1.0 2_Acyl_sn_glycero_3_phosphoethanolamine_hexadec_9_enoyl_c + 1.0 H2O_c = 1.0 hexadecenoate_c + 1.0 sn_glycero_3_Phosphoethanolamine_c + 1.0 H__c
rxn08841	0.0151216	1.0 H2O_c + 1.0 2_Acyl_sn_glycero_3_phosphoethanolamine_hexadecanoyl_c = 1.0 Hexadecanoic_acid_c + 1.0 sn_glycero_3_Phosphoethanolamine_c + 1.0 H__c
rxn08840	0.0151216	1.0 2_Acyl_sn_glycero_3_phosphoethanolamine_tetradec_7_enoyl_c + 1.0 H2O_c = 1.0 H__c + 1.0 sn_glycero_3_Phosphoethanolamine_c + 1.0 tetradecenoate_c
rxn08839	0.0151216	1.0 H2O_c + 1.0 2_Acyl_sn_glycero_3_phosphoethanolamine_tetradecanoyl_c = 1.0 H__c + 1.0 sn_glycero_3_Phosphoethanolamine_c + 1.0 Tetradecanoic_acid_c
rxn08838	0.0151216	1.0 H2O_c + 1.0 2_Acyl_sn_glycero_3_phosphoethanolamine_dodecanoyl_c = 1.0 H__c + 1.0 sn_glycero_3_Phosphoethanolamine_c + 1.0 Dodecanoic_acid_c
rxn08823	0.0151216	1.0 2_octadec_11_enoyl_sn_glycerol_3_phosphate_c + 1.0 H2O_c = 1.0 sn_Glycerol_3_phosphate_c + 1.0 octadecenoate_c + 1.0 H__c
rxn08822	0.0151216	1.0 2_octadecanoyl_sn_glycerol_3_phosphate_c + 1.0 H2O_c = 1.0 sn_Glycerol_3_phosphate_c + 1.0 Octadecanoic_acid_c + 1.0 H__c
rxn08821	0.0151216	1.0 H2O_c + 1.0 2_hexadec_9_enoyl_sn_glycerol_3_phosphate_c = 1.0 hexadecenoate_c + 1.0 H__c + 1.0 sn_Glycerol_3_phosphate_c
rxn08820	0.0151216	1.0 H2O_c + 1.0 2_hexadecanoyl_sn_glycerol_3_phosphate_c = 1.0 Hexadecanoic_acid_c + 1.0 sn_Glycerol_3_phosphate_c + 1.0 H__c
rxn08819	0.0151216	1.0 2_tetradec_7_enoyl_sn_glycerol_3_phosphate_c + 1.0 H2O_c = 1.0 sn_Glycerol_3_phosphate_c + 1.0 tetradecenoate_c + 1.0 H__c
rxn08818	0.0151216	1.0 H2O_c + 1.0 2_tetradecanoyl_sn_glycerol_3_phosphate_c = 1.0 H__c + 1.0 Tetradecanoic_acid_c + 1.0 sn_Glycerol_3_phosphate_c
rxn08817	0.0151216	1.0 H2O_c + 1.0 2_dodecanoyl_sn_glycerol_3_phosphate_c = 1.0 H__c + 1.0 Dodecanoic_acid_c + 1.0 sn_Glycerol_3_phosphate_c
rxn08816	0.0151216	1.0 H2O_c + 1.0 1_Acyl_sn_glycero_3_phosphoglycerol_octadec_11_enoyl_c = 1.0 H__c + 1.0 octadecenoate_c + 1.0 Glycerophosphoglycerol_c
rxn08815	0.0151216	1.0 H2O_c + 1.0 1_Acyl_sn_glycero_3_phosphoglycerol_octadecanoyl_c = 1.0 H__c + 1.0 Octadecanoic_acid_c + 1.0 Glycerophosphoglycerol_c
rxn08814	0.0151216	1.0 H2O_c + 1.0 1_Acyl_sn_glycero_3_phosphoglycerol_hexadec_9_enoyl_c = 1.0 hexadecenoate_c + 1.0 Glycerophosphoglycerol_c + 1.0 H__c
rxn08813	0.0151216	1.0 H2O_c + 1.0 1_Acyl_sn_glycero_3_phosphoglycerol_hexadecanoyl_c = 1.0 Hexadecanoic_acid_c + 1.0 Glycerophosphoglycerol_c + 1.0 H__c
rxn08812	0.0151216	1.0 H2O_c + 1.0 1_Acyl_sn_glycero_3_phosphoglycerol_tetradec_7_enoyl_c = 1.0 H__c + 1.0 tetradecenoate_c + 1.0 Glycerophosphoglycerol_c
rxn08811	0.0151216	1.0 H2O_c + 1.0 1_Acyl_sn_glycero_3_phosphoglycerol_tetradecanoyl_c = 1.0 H__c + 1.0 Tetradecanoic_acid_c + 1.0 Glycerophosphoglycerol_c
rxn08810	0.0151216	1.0 H2O_c + 1.0 1_Acyl_sn_glycero_3_phosphoglycerol_dodecanoyl_c = 1.0 H__c + 1.0 Dodecanoic_acid_c + 1.0 Glycerophosphoglycerol_c
rxn08809	0.0151216	1.0 H2O_c + 1.0 1_Acyl_sn_glycero_3_phosphoethanolamine_c = 1.0 octadecenoate_c + 1.0 sn_glycero_3_Phosphoethanolamine_c + 1.0 H__c
rxn08808	0.0151216	1.0 H__c + 1.0 H2O_c + 1.0 1_Acyl_sn_glycero_3_phosphoethanolamine_c = 1.0 Octadecanoic_acid_c + 1.0 sn_glycero_3_Phosphoethanolamine_c
rxn08807	0.0151216	1.0 H2O_c + 1.0 1_Acyl_sn_glycero_3_phosphoethanolamine_hexadec_9_enoyl_c = 1.0 hexadecenoate_c + 1.0 sn_glycero_3_Phosphoethanolamine_c + 1.0 H__c
rxn08806	0.0151216	1.0 1_Acyl_sn_glycero_3_phosphoethanolamine_hexadecanoyl_c + 1.0 H2O_c = 1.0 Hexadecanoic_acid_c + 1.0 sn_glycero_3_Phosphoethanolamine_c + 1.0 H__c
rxn08805	0.0151216	1.0 1_Acyl_sn_glycero_3_phosphoethanolamine_tetradec_7_enoyl_c + 1.0 H2O_c = 1.0 H__c + 1.0 sn_glycero_3_Phosphoethanolamine_c + 1.0 tetradecenoate_c
rxn08804	0.0151216	1.0 1_Acyl_sn_glycero_3_phosphoethanolamine_tetradecanoyl_c + 1.0 H2O_c = 1.0 H__c + 1.0 sn_glycero_3_Phosphoethanolamine_c + 1.0 Tetradecanoic_acid_c
rxn08803	0.0151216	1.0 H2O_c + 1.0 1_Acyl_sn_glycero_3_phosphoethanolamine_dodecanoyl_c = 1.0 H__c + 1.0 sn_glycero_3_Phosphoethanolamine_c + 1.0 Dodecanoic_acid_c
rxn08802	0.0151216	1.0 H2O_c + 1.0 1_octadec_11_enoyl_sn_glycerol_3_phosphate_c = 1.0 sn_Glycerol_3_phosphate_c + 1.0 octadecenoate_c + 1.0 H__c
rxn08800	0.0151216	1.0 H2O_c + 1.0 1_hexadec_9_enoyl_sn_glycerol_3_phosphate_c = 1.0 hexadecenoate_c + 1.0 H__c + 1.0 sn_Glycerol_3_phosphate_c
rxn08799	0.0151216	1.0 H2O_c + 1.0 1_hexadecanoyl_sn_glycerol_3_phosphate_c = 1.0 Hexadecanoic_acid_c + 1.0 sn_Glycerol_3_phosphate_c + 1.0 H__c
rxn08798	0.0151216	1.0 1_tetradec_7_enoyl_sn_glycerol_3_phosphate_c + 1.0 H2O_c = 1.0 sn_Glycerol_3_phosphate_c + 1.0 tetradecenoate_c + 1.0 H__c
rxn08797	0.0151216	1.0 H2O_c + 1.0 1_tetradecanoyl_sn_glycerol_3_phosphate_c = 1.0 H__c + 1.0 Tetradecanoic_acid_c + 1.0 sn_Glycerol_3_phosphate_c
rxn08796	0.0151216	1.0 H2O_c + 1.0 1_dodecanoyl_sn_glycerol_3_phosphate_c = 1.0 H__c + 1.0 Dodecanoic_acid_c + 1.0 sn_Glycerol_3_phosphate_c
rxn03951	0.0150558	1.0 NAD__c + 1.0 O_Phospho_4_hydroxy_L_threonine_c = 1.0 H__c + 1.0 NADH_c + 1.0 2_Amino_3_oxo_4_phosphonooxybutyrate_c
rxn01187	0.0149704	1.0 D_Xylulose_5_phosphate_c + 1.0 Orthophosphate_c + 1.0 H__c = 1.0 H2O_c + 1.0 Acetyl_phosphate_c + 1.0 D_Glyceraldehyde_3_phosphate_c
rxn01133	0.0147528	1.0 Acetyl_CoA_c + 1.0 Maltose_c = 1.0 Acetyl_maltose_c + 1.0 CoA_c
rxn01642	0.0147158	1.0 H2O_c + 1.0 4_Imidazolone_5_propanoate_c = 1.0 N_Formimino_L_glutamate_c
rxn09996	0.014571	45.0 UDP_glucuronate_c + 45.0 UDP_N_acetyl_D_galactosamine_c = 45.0 UMP_c + 45.0 UDP_c + 1.0 teichuronic_acid__GlcA___GalNac__45_repeating_unit__c + 45.0 H__c
rxn00782	0.0142701	1.0 3_Phospho_D_glyceroyl_phosphate_c + 1.0 NADPH_c = 1.0 Orthophosphate_c + 1.0 D_Glyceraldehyde_3_phosphate_c + 1.0 NADP__c
rxn02894	0.0141293	1.0 5_Methylthio_D_ribose_c + 1.0 ATP_c = 1.0 ADP_c + 1.0 S_Methyl_5_thio_D_ribose_1_phosphate_c
t_cpd00012	0.0141085	1.0 H__c + 1.0 Diphosphate_c = 1.0 Diphosphate_e + 1.0 H__e
rxn11268	0.0141085	1.0 H__c + 1.0 Diphosphate_c = 1.0 Diphosphate_e + 1.0 H__e
t_cpd00064	0.0140893	1.0 L_Arginine_e + 1.0 L_Ornithine_c = 1.0 L_Ornithine_e + 1.0 L_Arginine_c
rxn08657	0.0139858	1.0 Glycolate_c + 1.0 2_Demethylmenaquinone_8_c = 1.0 2_Demethylmenaquinol_8_c + 1.0 Glyoxylate_c
rxn01199	0.0138849	1.0 D_Xylulose_c + 1.0 ATP_c = 1.0 D_Xylulose_5_phosphate_c + 1.0 ADP_c
rxn05147	0.0137126	1.0 H2O_c + 1.0 D_Glucose_e + 1.0 ATP_c = 1.0 H__c + 1.0 Orthophosphate_c + 1.0 D_Glucose_c + 1.0 ADP_c
rxn09992	0.0136548	1.0 H2O_c + 1.0 Salicin_6_phosphate_c = 1.0 D_Glucose_6_phosphate_c + 1.0 Salicyl_alcohol_c
rxn08025	0.0136548	1.0 Arbutin_6_phosphate_c + 1.0 H2O_c = 1.0 p_Benzenediol_c + 1.0 D_Glucose_6_phosphate_c
rxn03482	0.0136548	1.0 H2O_c + 1.0 Salicin_6_phosphate_c = 1.0 beta_D_Glucose_6_phosphate_c + 1.0 Salicyl_alcohol_c
rxn03481	0.0136548	1.0 Arbutin_6_phosphate_c + 1.0 H2O_c = 1.0 p_Benzenediol_c + 1.0 beta_D_Glucose_6_phosphate_c
rxn00608	0.0136548	1.0 H2O_c + 1.0 6_Phospho_beta_D_glucosyl__1_4__D_glucose_c = 1.0 D_Glucose_c + 1.0 D_Glucose_6_phosphate_c
rxn02004	0.0136278	1.0 H2O_c + 1.0 alpha_alpha__Trehalose_6_phosphate_c = 1.0 alpha_alpha_Trehalose_c + 1.0 H__c + 1.0 Orthophosphate_c
t_cpd00573	0.0134524	1.0 L_Idonate_e + 1.0 H__e = 1.0 L_Idonate_c + 1.0 H__c
t_cpd00222	0.0134524	1.0 D_Gluconic_acid_e + 1.0 H__e = 1.0 H__c + 1.0 D_Gluconic_acid_c
t_cpd04097	0.0134258	1.0 H2O_c + 1.0 ATP_c + 1.0 Lead_c = 1.0 Lead_e + 1.0 H__c + 1.0 Orthophosphate_c + 1.0 ADP_c
t_cpd03696	0.0134258	1.0 Arbutin_e + 1.0 Phosphoenolpyruvate_c = 1.0 Pyruvate_c + 1.0 Arbutin_6_phosphate_c
t_cpd01030	0.0134258	1.0 Salicin_e + 1.0 Phosphoenolpyruvate_c = 1.0 Pyruvate_c + 1.0 Salicin_6_phosphate_c
t_cpd00531	0.0134258	1.0 Mercury_2___c + 1.0 H2O_c + 1.0 ATP_c = 1.0 H__c + 1.0 Orthophosphate_c + 1.0 ADP_c + 1.0 Mercury_2___e
t_cpd00010	0.0134258	1.0 CoA_e = 1.0 CoA_c
rxn10344	0.0134258	1.0 H2O_c + 1.0 ATP_c + 1.0 Lead_c = 1.0 Lead_e + 1.0 H__c + 1.0 Orthophosphate_c + 1.0 ADP_c
rxn10343	0.0134258	1.0 Mercury_2___c + 1.0 H2O_c + 1.0 ATP_c = 1.0 H__c + 1.0 Orthophosphate_c + 1.0 ADP_c + 1.0 Mercury_2___e
rxn09177	0.0134258	1.0 CTP_c + 1.0 D_4__Phosphopantothenate_c + 1.0 L_Cysteine_c = 1.0 _R__4__Phosphopantothenoyl_L_cysteine_c + 1.0 Diphosphate_c + 1.0 CMP_c
rxn06077	0.0134258	1.0 H2O_c + 1.0 trdox_c + 1.0 L_Methionine_c = 1.0 trdrd_c + 1.0 L_Methionine_S_oxide_c
rxn05528	0.0134258	1.0 H2O_c + 1.0 Copper2_c + 1.0 ATP_c = 1.0 H__c + 1.0 Orthophosphate_c + 1.0 Copper2_e + 1.0 ADP_c
rxn05516	0.0134258	1.0 H2O_c + 1.0 Cadmium_c + 1.0 ATP_c = 1.0 H__c + 1.0 Orthophosphate_c + 1.0 Cadmium_e + 1.0 ADP_c
rxn00409	0.0134258	1.0 CDP_c + 1.0 ATP_c = 1.0 CTP_c + 1.0 ADP_c
rxn00408	0.0134258	1.0 CTP_c + 1.0 H2O_c = 1.0 CDP_c + 1.0 H__c + 1.0 Orthophosphate_c
rxn00237	0.0134258	1.0 GDP_c + 1.0 ATP_c = 1.0 GTP_c + 1.0 ADP_c
rxn00117	0.0134258	1.0 UDP_c + 1.0 ATP_c = 1.0 UTP_c + 1.0 ADP_c
rxn09989	0.0134258	5.0 H2O_c + 1.0 Dextrin_c = 6.0 D_Glucose_c
rxn08936	0.0134258	1.0 H2O_c + 1.0 Maltoheptaose_c = 1.0 Maltohexaose_c + 1.0 D_Glucose_c
rxn08935	0.0134258	1.0 Maltohexaose_c + 1.0 H2O_c = 1.0 Maltopentaose_c + 1.0 D_Glucose_c
rxn08934	0.0134258	1.0 H2O_c + 1.0 Maltopentaose_c = 1.0 D_Glucose_c + 1.0 Maltotetraose_c
rxn08933	0.0134258	1.0 H2O_c + 1.0 Maltotetraose_c = 1.0 Maltotriose_c + 1.0 D_Glucose_c
rxn05746	0.0134258	1.0 Maltotriose_c + 1.0 H2O_c = 1.0 D_Glucose_c + 1.0 Maltose_c
rxn05647	0.0134258	1.0 Salicin_e + 1.0 Phosphoenolpyruvate_c = 1.0 Pyruvate_c + 1.0 Salicin_6_phosphate_c
rxn05501	0.0134258	1.0 Arbutin_e + 1.0 Phosphoenolpyruvate_c = 1.0 Pyruvate_c + 1.0 Arbutin_6_phosphate_c
rxn01385	0.0134258	1.0 NAD__c + 1.0 Xylitol_c = 1.0 H__c + 1.0 NADH_c + 1.0 D_Xylulose_c
rxn01259	0.0134258	1.0 H2O_c + 1.0 Isomaltose_c = 2.0 D_Glucose_c
rxn00575	0.0134258	1.0 Sucrose_c + 1.0 H2O_c = 1.0 D_Glucose_c + 1.0 D_Fructose_c
rxn00440	0.0134258	1.0 Thiamine_c + 1.0 ATP_c = 1.0 Thiamin_diphosphate_c + 1.0 AMP_c
rxn00375	0.0131997	1.0 N_Formyl_L_glutamate_c + 1.0 H2O_c = 1.0 L_Glutamate_c + 1.0 Formate_c
rxn06076	0.0131989	1.0 CDP_c + 1.0 trdrd_c = 1.0 H2O_c + 1.0 trdox_c + 1.0 dCDP_c
t_cpd00039	0.0131397	1.0 L_Lysine_c + 1.0 H__e = 1.0 H__c + 1.0 L_Lysine_e
rxn01842	0.0129537	1.0 CoA_c + 1.0 Phenyl_acetate_c + 1.0 ATP_c = 1.0 Phenylacetyl_CoA_c + 1.0 Diphosphate_c + 1.0 AMP_c
rxn02925	0.0128571	1.0 2_Methyl_3_oxopropanoate_c + 1.0 L_Alanine_c = 1.0 Pyruvate_c + 1.0 L_3_Amino_isobutanoate_c
rxn00189	0.0126795	1.0 L_Glutamine_c + 1.0 H2O_c = 1.0 L_Glutamate_c + 1.0 NH3_c
rxn00010	0.0126411	1.0 H__c + 2.0 Glyoxylate_c = 1.0 2_Hydroxy_3_oxopropanoate_c + 1.0 CO2_c
rxn00707	0.0125414	1.0 ITP_c + 1.0 Cytidine_c = 1.0 IDP_c + 1.0 CMP_c
rxn00364	0.0125414	1.0 ATP_c + 1.0 CMP_c = 1.0 CDP_c + 1.0 ADP_c
rxn10373	0.0123921	1.0 H2O_c + 1.0 2_Acyl_sn_glycero_3_phosphoglycerol_octadecanoyl_c = 1.0 H__c + 1.0 Glycerophosphoglycerol_c + 1.0 ocdca_c
rxn05560	0.0123336	1.0 D_Fructose_e + 1.0 Phosphoenolpyruvate_c = 1.0 Pyruvate_c + 1.0 D_Fructose_1_phosphate_c
t_cpd00082	0.0123336	1.0 D_Fructose_e + 1.0 Phosphoenolpyruvate_c = 1.0 Pyruvate_c + 1.0 D_Fructose_1_phosphate_c
rxn10945	0.0122222	1.0 L_Proline_e = 1.0 L_Proline_c
rxn10011	0.0121996	1.0 H__c + 1.0 NADH_c + 1.0 trans_Oct_2_enoyl_CoA_c = 1.0 NAD__c + 1.0 Octanoyl_CoA_c
rxn05462	0.0120539	1.0 3_Hydroxyoctodecanoyl_ACP_c = 1.0 trans_Octodec_2_enoyl_ACP_c + 1.0 H2O_c
rxn05431	0.0120539	1.0 14_methyl_3_hydroxy_pentadecanoyl_ACP_c = 1.0 H2O_c + 1.0 14_methyl_trans_pentadec_2_enoyl_ACP_c
rxn05427	0.0120539	1.0 12_methyl_3_hydroxy_tridecanoyl_ACP_c = 1.0 H2O_c + 1.0 12_methyl_trans_tridec_2_enoyl_ACP_c
rxn05423	0.0120539	1.0 10_methyl_3_hydroxy_undecanoyl_ACP_c = 1.0 H2O_c + 1.0 10_methyl_trans_undec_2_enoyl_ACP_c
rxn05419	0.0120539	1.0 8_methyl_3_hydroxy_nonanoyl_ACP_c = 1.0 H2O_c + 1.0 8_methyl_trans_non_2_enoyl_ACP_c
rxn05415	0.0120539	1.0 6_methyl_3_hydroxy_heptanoyl_ACP_c = 1.0 H2O_c + 1.0 6_methyl_trans_hept_2_enoyl_ACP_c
rxn05411	0.0120539	1.0 4_methyl_3_hydroxy_pentanoyl_ACP_c = 1.0 4_methyl_trans_pent_2_enoyl_ACP_c + 1.0 H2O_c
rxn05334	0.0120539	1.0 _3R__3_Hydroxyoctanoyl__acyl_carrier_protein__c = 1.0 H2O_c + 1.0 trans_Oct_2_enoyl__acp__c
rxn05332	0.0120539	1.0 _3R__3_Hydroxypalmitoyl__acyl_carrier_protein__c = 1.0 trans_Hexadec_2_enoyl__acp__c + 1.0 H2O_c
rxn05330	0.0120539	1.0 _R__3_Hydroxyhexanoyl__acp__c = 1.0 H2O_c + 1.0 trans_Hex_2_enoyl__acp__c
rxn05329	0.0120539	1.0 _3R__3_Hydroxybutanoyl__acyl_carrier_protein__c = 1.0 But_2_enoyl__acyl_carrier_protein__c + 1.0 H2O_c
rxn00787	0.011976	1.0 D_Tagatose_1_6_bisphosphate_c = 1.0 Glycerone_phosphate_c + 1.0 D_Glyceraldehyde_3_phosphate_c
rxn00510	0.0116736	1.0 NAD__c + 1.0 H2O_c + 1.0 N6__L_1_3_Dicarboxypropyl__L_lysine_c = 1.0 L_Lysine_c + 1.0 2_Oxoglutarate_c + 1.0 NADH_c + 1.0 H__c
rxn08711	0.0116037	1.0 heptosyl_kdo2_lipidA_c + 1.0 ADP_L_glycero_D_manno_heptose_c = 1.0 ADP_c + 1.0 heptosyl_heptosyl_kdo2_lipidA_c
rxn01800	0.011532	1.0 H__c + 1.0 H2O_c + 1.0 Deoxycytidine_c = 1.0 Deoxyuridine_c + 1.0 NH3_c
rxn01258	0.0114512	1.0 Chorismate_c = 1.0 Isochorismate_c
rxn00748	0.0113907	1.0 Glycerone_phosphate_c = 1.0 H__c + 1.0 Orthophosphate_c + 1.0 Methylglyoxal_c
rxn08669	0.0113907	1.0 H2O_c + 1.0 Glycerophosphoglycerol_c = 1.0 Glycerol_c + 1.0 sn_Glycerol_3_phosphate_c
rxn01073	0.0113907	1.0 H2O_c + 1.0 sn_glycero_3_Phosphoethanolamine_c = 1.0 sn_Glycerol_3_phosphate_c + 1.0 Ethanolamine_c
rxn00758	0.0113907	1.0 H2O_c + 1.0 sn_glycero_3_Phosphocholine_c = 1.0 Choline_c + 1.0 sn_Glycerol_3_phosphate_c
rxn00065	0.0112242	1.0 ATP_c = 1.0 Diphosphate_c + 1.0 3__5__Cyclic_AMP_c
rxn00904	0.0111731	1.0 Pyruvate_c + 1.0 L_Valine_c = 1.0 L_Alanine_c + 1.0 3_Methyl_2_oxobutanoic_acid_c
rxn07845	0.0109669	1.0 D_Glucarate_c = 1.0 H2O_c + 1.0 2_Dehydro_3_deoxy_D_glucarate_c
rxn01989	0.0109669	1.0 D_Glucarate_c = 1.0 5_Dehydro_4_deoxy_D_glucarate_c + 1.0 H2O_c
rxn01634	0.0108699	1.0 5_Dehydro_4_deoxy_D_glucarate_c + 1.0 H__c = 1.0 H2O_c + 1.0 CO2_c + 1.0 2_5_Dioxopentanoate_c
rxn01537	0.010691	1.0 H2O_c + 1.0 Thiamine_c = 1.0 H__c + 1.0 5__2_Hydroxyethyl__4_methylthiazole_c + 1.0 4_Amino_5_hydroxymethyl_2_methylpyrimidine_c
rxn00670	0.0104995	1.0 H__c + 1.0 Orthophosphate_c + 1.0 Propanoyl_CoA_c = 1.0 Propanoyl_phosphate_c + 1.0 CoA_c
rxn00173	0.0104995	1.0 H__c + 1.0 Orthophosphate_c + 1.0 Acetyl_CoA_c = 1.0 Acetyl_phosphate_c + 1.0 CoA_c
rxn00002	0.0102785	3.0 H__c + 1.0 H2O_c + 1.0 Urea_1_carboxylate_c = 2.0 CO2_c + 2.0 NH3_c
rxn05578	0.0102581	1.0 H__e + 1.0 sn_Glycerol_3_phosphate_e = 1.0 sn_Glycerol_3_phosphate_c + 1.0 H__c
rxn05598	0.0100423	1.0 H2O_c + 1.0 Lactose_e + 1.0 ATP_c = 1.0 H__c + 1.0 Orthophosphate_c + 1.0 Lactose_c + 1.0 ADP_c
t_cpd00208	0.0100423	1.0 H2O_c + 1.0 Lactose_e + 1.0 ATP_c = 1.0 H__c + 1.0 Orthophosphate_c + 1.0 Lactose_c + 1.0 ADP_c
rxn00469	0.00994971	1.0 H2O_c + 1.0 N_Acetylornithine_c = 1.0 L_Ornithine_c + 1.0 Acetate_c
rxn01218	0.0099482	1.0 dCMP_c + 1.0 H2O_c = 1.0 H__c + 1.0 Orthophosphate_c + 1.0 Deoxycytidine_c
rxn03445	0.00992043	1.0 O_Phospho_4_hydroxy_L_threonine_c + 1.0 2_Oxoglutarate_c = 1.0 L_Glutamate_c + 1.0 2_Oxo_3_hydroxy_4_phosphobutanoate_c
rxn00999	0.00985798	1.0 Phenylpyruvate_c + 1.0 Oxygen_c = 1.0 CO2_c + 1.0 2_Hydroxyphenylacetate_c
rxn00879	0.00983083	1.0 NAD__c + 1.0 myo_Inositol_c = 1.0 H__c + 1.0 NADH_c + 1.0 2_4_6_3_5_Pentahydroxycyclohexanone_c
rxn04385	0.00968329	1.0 H__c + 1.0 L_Threonine_O_3_phosphate_c = 1.0 D_1_Aminopropan_2_ol_O_phosphate_c + 1.0 CO2_c
rxn05292	0.00903333	1.0 Fe3__e = 1.0 Fe3__c
t_cpd00033	0.00889305	1.0 Glycine_e + 1.0 H__e = 1.0 H__c + 1.0 Glycine_c
rxn10136	0.00888388	1.0 L_Glutamate_e + 1.0 4_Aminobutanoate_c = 1.0 L_Glutamate_c + 1.0 4_Aminobutanoate_e
rxn05504	0.00888388	1.0 H2O_c + 1.0 ARSENOBETAINE_e + 1.0 ATP_c = 1.0 H__c + 1.0 Orthophosphate_c + 1.0 ARSENOBETAINE_c + 1.0 ADP_c
rxn05193	0.00888388	1.0 Butyro_betaine_e + 1.0 H2O_c + 1.0 ATP_c = 1.0 H__c + 1.0 Orthophosphate_c + 1.0 Butyro_betaine_c + 1.0 ADP_c
rxn05192	0.00888388	1.0 H2O_c + 1.0 Crotono_betaine_e + 1.0 ATP_c = 1.0 H__c + 1.0 Orthophosphate_c + 1.0 Crotono_betaine_c + 1.0 ADP_c
rxn05159	0.00888388	1.0 H2O_c + 1.0 ATP_c + 1.0 Choline_e = 1.0 Choline_c + 1.0 Orthophosphate_c + 1.0 ADP_c + 1.0 H__c
rxn02989	0.00888388	1.0 2_Amino_3_carboxymuconate_semialdehyde_c = 1.0 H2O_c + 1.0 Pyridine_2_3_dicarboxylate_c
rxn01927	0.00888388	1.0 3_Hydroxyanthranilate_c + 1.0 Oxygen_c = 1.0 H__c + 1.0 2_Amino_3_carboxymuconate_semialdehyde_c
t_cpd08306	0.00888388	1.0 Butyro_betaine_e + 1.0 H2O_c + 1.0 ATP_c = 1.0 H__c + 1.0 Orthophosphate_c + 1.0 Butyro_betaine_c + 1.0 ADP_c
t_cpd08305	0.00888388	1.0 H2O_c + 1.0 Crotono_betaine_e + 1.0 ATP_c = 1.0 H__c + 1.0 Orthophosphate_c + 1.0 Crotono_betaine_c + 1.0 ADP_c
rxn05740	0.00888388	1.0 H__c + 1.0 Orthophosphate_c + 1.0 Glycogen_c = 1.0 glycogen_n_1__c + 1.0 D_Glucose_1_phosphate_c
rxn00328	0.00884931	1.0 4_Hydroxy_2_oxoglutarate_c = 1.0 Pyruvate_c + 1.0 Glyoxylate_c
rxn00868	0.0087919	1.0 H__c + 1.0 NADH_c + 1.0 Crotonoyl_CoA_c = 1.0 NAD__c + 1.0 Butanoyl_CoA_c
rxn00743	0.00861682	1.0 Glycerone_phosphate_c + 1.0 H2O_c = 1.0 H__c + 1.0 Orthophosphate_c + 1.0 Glycerone_c
rxn01858	0.00851846	1.0 H__c + 1.0 H2O_c + 1.0 Deoxyadenosine_c = 1.0 Deoxyinosine_c + 1.0 NH3_c
rxn01137	0.00851846	1.0 H__c + 1.0 H2O_c + 1.0 Adenosine_c = 1.0 Inosine_c + 1.0 NH3_c
rxn05732	0.00848963	1.0 H__c + 1.0 NADH_c + 1.0 trans_Hexadec_2_enoyl_CoA_c = 1.0 NAD__c + 1.0 Palmitoyl_CoA_c
rxn05362	0.00848466	1.0 4_methyl_trans_hex_2_enoyl_ACP_c + 1.0 NADPH_c + 1.0 H__c = 1.0 4_methyl_hexanoyl_ACP_c + 1.0 NADP__c
rxn10118	0.00848157	1.0 Hydrogen_c + 2.0 H__c + 1.0 Ubiquinone_8_c = 1.0 Ubiquinol_8_c + 2.0 H__e
rxn02166	0.00838962	1.0 H2O_c + 1.0 4_Nitrophenyl_phosphate_c = 1.0 H__c + 1.0 Orthophosphate_c + 1.0 4_Nitrophenol_c
rxn10537	0.00837117	1.0 Glycine_e + 1.0 Sodium_e = 1.0 Glycine_c + 1.0 Sodium_c
rxn10181	0.00837117	1.0 Nicotinamide_D_ribonucleotide_e = 1.0 Nicotinamide_D_ribonucleotide_c
rxn00599	0.00837117	1.0 H__c + 1.0 Succinyl_CoA_c + 1.0 Glycine_c = 1.0 5_Aminolevulinate_c + 1.0 CO2_c + 1.0 CoA_c
t_cpd00971	0.00831809	1.0 Sodium_e + 1.0 H__c = 1.0 Sodium_c + 1.0 H__e
t_cpd15606	0.00830656	1.0 H2O_c + 1.0 Gly_Tyr_e + 1.0 ATP_c = 1.0 Orthophosphate_c + 1.0 Gly_Tyr_c + 1.0 ADP_c
t_cpd15605	0.00830656	1.0 H2O_c + 1.0 Gly_Phe_e + 1.0 ATP_c = 1.0 Orthophosphate_c + 1.0 Gly_Phe_c + 1.0 ADP_c
t_cpd15604	0.00830656	1.0 H2O_c + 1.0 Gly_Leu_e + 1.0 ATP_c = 1.0 Gly_Leu_c + 1.0 Orthophosphate_c + 1.0 ADP_c
t_cpd15603	0.00830656	1.0 Gly_Cys_e + 1.0 H2O_c + 1.0 ATP_c = 1.0 Orthophosphate_c + 1.0 ADP_c + 1.0 Gly_Cys_c
t_cpd11593	0.00830656	1.0 H2O_c + 1.0 ala_L_asp_L_e + 1.0 ATP_c = 1.0 H__c + 1.0 Orthophosphate_c + 1.0 ala_L_asp_L_c + 1.0 ADP_c
t_cpd11592	0.00830656	1.0 H2O_c + 1.0 ATP_c + 1.0 gly_glu_L_e = 1.0 gly_glu_L_c + 1.0 Orthophosphate_c + 1.0 ADP_c + 1.0 H__c
t_cpd11591	0.00830656	1.0 Gly_Met_e + 1.0 H2O_c + 1.0 ATP_c = 1.0 H__c + 1.0 Orthophosphate_c + 1.0 ADP_c + 1.0 Gly_Met_c
t_cpd11590	0.00830656	1.0 H2O_c + 1.0 ATP_c + 1.0 met_L_ala_L_e = 1.0 met_L_ala_L_c + 1.0 H__c + 1.0 Orthophosphate_c + 1.0 ADP_c
t_cpd11589	0.00830656	1.0 H2O_c + 1.0 gly_asp_L_e + 1.0 ATP_c = 1.0 H__c + 1.0 Orthophosphate_c + 1.0 gly_asp_L_c + 1.0 ADP_c
t_cpd11588	0.00830656	1.0 H2O_c + 1.0 gly_pro_L_e + 1.0 ATP_c = 1.0 H__c + 1.0 gly_pro_L_c + 1.0 Orthophosphate_c + 1.0 ADP_c
t_cpd11587	0.00830656	1.0 H2O_c + 1.0 Ala_Gln_e + 1.0 ATP_c = 1.0 H__c + 1.0 Orthophosphate_c + 1.0 Ala_Gln_c + 1.0 ADP_c
t_cpd11586	0.00830656	1.0 H2O_c + 1.0 ala_L_glu_L_e + 1.0 ATP_c = 1.0 H__c + 1.0 Orthophosphate_c + 1.0 ala_L_glu_L_c + 1.0 ADP_c
t_cpd11585	0.00830656	1.0 H2O_c + 1.0 ATP_c + 1.0 L_alanylglycine_e = 1.0 L_alanylglycine_c + 1.0 H__c + 1.0 Orthophosphate_c + 1.0 ADP_c
t_cpd11584	0.00830656	1.0 H2O_c + 1.0 Ala_His_e + 1.0 ATP_c = 1.0 H__c + 1.0 Ala_His_c + 1.0 Orthophosphate_c + 1.0 ADP_c
t_cpd11583	0.00830656	1.0 H2O_c + 1.0 ATP_c + 1.0 Ala_Leu_e = 1.0 Ala_Leu_c + 1.0 H__c + 1.0 Orthophosphate_c + 1.0 ADP_c
t_cpd11582	0.00830656	1.0 H2O_c + 1.0 ala_L_Thr_L_e + 1.0 ATP_c = 1.0 H__c + 1.0 Orthophosphate_c + 1.0 ala_L_Thr_L_c + 1.0 ADP_c
t_cpd11581	0.00830656	1.0 H2O_c + 1.0 gly_asn_L_e + 1.0 ATP_c = 1.0 H__c + 1.0 Orthophosphate_c + 1.0 gly_asn_L_c + 1.0 ADP_c
t_cpd11580	0.00830656	1.0 H2O_c + 1.0 Gly_Gln_e + 1.0 ATP_c = 1.0 H__c + 1.0 Orthophosphate_c + 1.0 Gly_Gln_c + 1.0 ADP_c
t_cpd01017	0.00830656	1.0 Cys_Gly_e + 1.0 H2O_c + 1.0 ATP_c = 1.0 H__c + 1.0 Orthophosphate_c + 1.0 ADP_c + 1.0 Cys_Gly_c
rxn12851	0.00830656	1.0 H2O_c + 1.0 Gly_Tyr_e + 1.0 ATP_c = 1.0 Orthophosphate_c + 1.0 Gly_Tyr_c + 1.0 ADP_c
rxn12850	0.00830656	1.0 H2O_c + 1.0 Gly_Phe_e + 1.0 ATP_c = 1.0 Orthophosphate_c + 1.0 Gly_Phe_c + 1.0 ADP_c
rxn12849	0.00830656	1.0 H2O_c + 1.0 Gly_Leu_e + 1.0 ATP_c = 1.0 Gly_Leu_c + 1.0 Orthophosphate_c + 1.0 ADP_c
rxn12848	0.00830656	1.0 Gly_Cys_e + 1.0 H2O_c + 1.0 ATP_c = 1.0 Orthophosphate_c + 1.0 ADP_c + 1.0 Gly_Cys_c
rxn05547	0.00830656	1.0 H2O_c + 1.0 Gly_Gln_e + 1.0 ATP_c = 1.0 H__c + 1.0 Orthophosphate_c + 1.0 Gly_Gln_c + 1.0 ADP_c
rxn05546	0.00830656	1.0 H2O_c + 1.0 gly_asn_L_e + 1.0 ATP_c = 1.0 H__c + 1.0 Orthophosphate_c + 1.0 gly_asn_L_c + 1.0 ADP_c
rxn05545	0.00830656	1.0 H2O_c + 1.0 ala_L_Thr_L_e + 1.0 ATP_c = 1.0 H__c + 1.0 Orthophosphate_c + 1.0 ala_L_Thr_L_c + 1.0 ADP_c
rxn05544	0.00830656	1.0 H2O_c + 1.0 ATP_c + 1.0 Ala_Leu_e = 1.0 Ala_Leu_c + 1.0 H__c + 1.0 Orthophosphate_c + 1.0 ADP_c
rxn05543	0.00830656	1.0 H2O_c + 1.0 Ala_His_e + 1.0 ATP_c = 1.0 H__c + 1.0 Ala_His_c + 1.0 Orthophosphate_c + 1.0 ADP_c
rxn05542	0.00830656	1.0 H2O_c + 1.0 ATP_c + 1.0 L_alanylglycine_e = 1.0 L_alanylglycine_c + 1.0 H__c + 1.0 Orthophosphate_c + 1.0 ADP_c
rxn05541	0.00830656	1.0 H2O_c + 1.0 ala_L_glu_L_e + 1.0 ATP_c = 1.0 H__c + 1.0 Orthophosphate_c + 1.0 ala_L_glu_L_c + 1.0 ADP_c
rxn05540	0.00830656	1.0 H2O_c + 1.0 Ala_Gln_e + 1.0 ATP_c = 1.0 H__c + 1.0 Orthophosphate_c + 1.0 Ala_Gln_c + 1.0 ADP_c
rxn05539	0.00830656	1.0 Cys_Gly_e + 1.0 H2O_c + 1.0 ATP_c = 1.0 H__c + 1.0 Orthophosphate_c + 1.0 ADP_c + 1.0 Cys_Gly_c
rxn05538	0.00830656	1.0 H2O_c + 1.0 gly_pro_L_e + 1.0 ATP_c = 1.0 H__c + 1.0 gly_pro_L_c + 1.0 Orthophosphate_c + 1.0 ADP_c
rxn05537	0.00830656	1.0 H2O_c + 1.0 gly_asp_L_e + 1.0 ATP_c = 1.0 H__c + 1.0 Orthophosphate_c + 1.0 gly_asp_L_c + 1.0 ADP_c
rxn05536	0.00830656	1.0 H2O_c + 1.0 ATP_c + 1.0 met_L_ala_L_e = 1.0 met_L_ala_L_c + 1.0 H__c + 1.0 Orthophosphate_c + 1.0 ADP_c
rxn05535	0.00830656	1.0 Gly_Met_e + 1.0 H2O_c + 1.0 ATP_c = 1.0 H__c + 1.0 Orthophosphate_c + 1.0 ADP_c + 1.0 Gly_Met_c
rxn05534	0.00830656	1.0 H2O_c + 1.0 ATP_c + 1.0 gly_glu_L_e = 1.0 gly_glu_L_c + 1.0 Orthophosphate_c + 1.0 ADP_c + 1.0 H__c
rxn05533	0.00830656	1.0 H2O_c + 1.0 ala_L_asp_L_e + 1.0 ATP_c = 1.0 H__c + 1.0 Orthophosphate_c + 1.0 ala_L_asp_L_c + 1.0 ADP_c
rxn00762	0.00828269	1.0 NAD__c + 1.0 Glycerol_c = 1.0 H__c + 1.0 NADH_c + 1.0 Glycerone_c
rxn04954	0.00822125	1.0 NAD__c + 1.0 5_Methyltetrahydrofolate_c = 1.0 H__c + 1.0 5_10_Methylenetetrahydrofolate_c + 1.0 NADH_c
rxn10154	0.00805589	1.0 Succinate_e + 2.0 H__e = 1.0 Succinate_c + 2.0 H__c
rxn10153	0.00805589	1.0 _S__Malate_e + 2.0 H__e = 2.0 H__c + 1.0 _S__Malate_c
rxn10152	0.00805589	1.0 Fumarate_e + 2.0 H__e = 2.0 H__c + 1.0 Fumarate_c
rxn01618	0.00805589	1.0 _S__Lactaldehyde_c + 1.0 NADP__c = 1.0 H__c + 1.0 Methylglyoxal_c + 1.0 NADPH_c
rxn00351	0.00805589	1.0 ATP_c + 1.0 Glycine_c + 1.0 gamma_L_Glutamyl_L_cysteine_c = 1.0 H__c + 1.0 Orthophosphate_c + 1.0 Glutathione_c + 1.0 ADP_c
t_cpd00024	0.00780567	1.0 2_Oxoglutarate_e + 1.0 H__e = 1.0 H__c + 1.0 2_Oxoglutarate_c
rxn05493	0.00780567	1.0 2_Oxoglutarate_e + 1.0 H__e = 1.0 H__c + 1.0 2_Oxoglutarate_c
rxn05165	0.00763377	1.0 H2O_c + 1.0 L_Proline_e + 1.0 ATP_c = 1.0 H__c + 1.0 Orthophosphate_c + 1.0 L_Proline_c + 1.0 ADP_c
rxn05485	0.00760498	1.0 N_Acetyl_D_glucosamine_e + 1.0 Phosphoenolpyruvate_c = 1.0 Pyruvate_c + 1.0 N_Acetyl_D_glucosamine_6_phosphate_c
t_cpd00122	0.00760498	1.0 N_Acetyl_D_glucosamine_e + 1.0 Phosphoenolpyruvate_c = 1.0 Pyruvate_c + 1.0 N_Acetyl_D_glucosamine_6_phosphate_c
rxn00251	0.0075005	2.0 H__c + 1.0 Orthophosphate_c + 1.0 Oxaloacetate_c = 1.0 H2O_c + 1.0 CO2_c + 1.0 Phosphoenolpyruvate_c
rxn01991	0.00730494	1.0 H2O_c + 1.0 meso_2_6_Diaminoheptanedioate_c + 1.0 NADP__c = 1.0 H__c + 1.0 L_2_Amino_6_oxoheptanedioate_c + 1.0 NADPH_c + 1.0 NH3_c
rxn01775	0.00729631	1.0 NAD__c + 1.0 D_Mannonate_c = 1.0 NADH_c + 1.0 H__c + 1.0 D_Fructuronate_c
rxn10288	0.00721111	1.0 1_2_Diisohexadecanoyl_sn_glycerol_c + 1.0 UDP_glucose_c = 1.0 UDP_c + 1.0 Monoglucosyl_1_2_diisohexadecanoylglycerol_c
rxn10287	0.00721111	1.0 1_2_Dianteisopentadecanoyl_sn_glycerol_c + 1.0 UDP_glucose_c = 1.0 Monoglucosyl_1_2_dianteisopentadecanoylglycerol_c + 1.0 UDP_c
rxn10286	0.00721111	1.0 1_2_Diisopentadecanoyl_sn_glycerol_c + 1.0 UDP_glucose_c = 1.0 Monoglucosyl_1_2_diisopentadecanoylglycerol_c + 1.0 UDP_c
rxn10285	0.00721111	1.0 1_2_Diisotetradecanoyl_sn_glycerol_c + 1.0 UDP_glucose_c = 1.0 UDP_c + 1.0 Monoglucosyl_1_2_diisotetradecanoylglycerol_c
rxn10281	0.00721111	1.0 1_2_Diacyl_sn_glycerol_ditetradecanoyl_c + 1.0 UDP_glucose_c = 1.0 Monoglucosyl_1_2_dimyristoylglycerol_c + 1.0 UDP_c
rxn10280	0.00721111	1.0 UDP_glucose_c + 1.0 1_2_Diacyl_sn_glycerol_dihexadecanoyl_c = 1.0 UDP_c + 1.0 Monoglucosyl_1_2_dipalmitoylglycerol_c
rxn10279	0.00721111	1.0 Monoglucosyl_1_2_diisohexadecanoylglycerol_c + 1.0 UDP_glucose_c = 1.0 UDP_c + 1.0 Diglucosyl_1_2_diisohexadecanoylglycerol_c
rxn10278	0.00721111	1.0 Monoglucosyl_1_2_dianteisopentadecanoylglycerol_c + 1.0 UDP_glucose_c = 1.0 UDP_c + 1.0 Diglucosyl_1_2_dianteisopentadecanoylglycerol_c
rxn10277	0.00721111	1.0 Monoglucosyl_1_2_diisopentadecanoylglycerol_c + 1.0 UDP_glucose_c = 1.0 UDP_c + 1.0 Diglucosyl_1_2_diisopentadecanoylglycerol_c
rxn10276	0.00721111	1.0 Monoglucosyl_1_2_diisotetradecanoylglycerol_c + 1.0 UDP_glucose_c = 1.0 UDP_c + 1.0 Diglucosyl_1_2_diisotetradecanoylglycerol_c
rxn10272	0.00721111	1.0 Monoglucosyl_1_2_dimyristoylglycerol_c + 1.0 UDP_glucose_c = 1.0 UDP_c + 1.0 Diglucosyl_1_2_dimyristoylglycerol_c
rxn10271	0.00721111	1.0 Monoglucosyl_1_2_dipalmitoylglycerol_c + 1.0 UDP_glucose_c = 1.0 UDP_c + 1.0 Diglucosyl_1_2_dipalmitoylglycerol_c
rxn01505	0.00721111	1.0 N_Acetyl_D_glucosamine_6_phosphate_c = 1.0 N_Acetyl_D_glucosamine_1_phosphate_c
rxn00642	0.00721111	1.0 GDP_mannose_c = 1.0 H2O_c + 1.0 GDP_4_dehydro_6_deoxy_D_mannose_c
rxn03638	0.00721111	1.0 Acetyl_CoA_c + 1.0 alpha_D_Glucosamine_1_phosphate_c = 1.0 N_Acetyl_D_glucosamine_1_phosphate_c + 1.0 CoA_c + 1.0 H__c
rxn04673	0.00708714	1.0 1_4_Dihydroxy_2_naphthoate_c + 1.0 Phytyl_diphosphate_c = 1.0 H__c + 1.0 Diphosphate_c + 1.0 CO2_c + 1.0 2_Phytyl_1_4_naphthoquinone_c
rxn02788	0.00695525	1.0 2_Hydroxymuconate_c = 1.0 _Z__5_Oxohex_2_enedioate_c
rxn02190	0.00691809	1.0 5_6_Dihydrothymine_c + 1.0 H2O_c = 1.0 H__c + 1.0 3_Ureidoisobutyrate_c
rxn01626	0.00691809	1.0 5_6_Dihydrouracil_c + 1.0 H2O_c = 1.0 H__c + 1.0 3_Ureidopropionate_c
rxn00641	0.00686373	1.0 D_Mannose_1_phosphate_c + 1.0 GTP_c = 1.0 GDP_mannose_c + 1.0 Diphosphate_c
rxn05179	0.00684613	1.0 H2O_c + 1.0 L_Isoleucine_e + 1.0 ATP_c = 1.0 H__c + 1.0 Orthophosphate_c + 1.0 L_Isoleucine_c + 1.0 ADP_c
rxn04016	0.00681849	1.0 trans_Aconitate_c + 1.0 S_Adenosyl_L_methionine_c = 1.0 _E__3__Methoxycarbonyl_pent_2_enedioate_c + 1.0 S_Adenosyl_L_homocysteine_c
rxn10188	0.00678839	2.0 Orthophosphate_c + 1.0 L_Fucose_1_phosphate_e = 1.0 L_Fucose_1_phosphate_c + 2.0 Orthophosphate_e
rxn10187	0.00678839	2.0 Orthophosphate_c + 1.0 D_Mannose_6_phosphate_e = 1.0 D_Mannose_6_phosphate_c + 2.0 Orthophosphate_e
rxn05563	0.00678839	2.0 Orthophosphate_c + 1.0 D_Glucose_6_phosphate_e = 2.0 Orthophosphate_e + 1.0 D_Glucose_6_phosphate_c
t_cpd01912	0.00678839	2.0 Orthophosphate_c + 1.0 L_Fucose_1_phosphate_e = 1.0 L_Fucose_1_phosphate_c + 2.0 Orthophosphate_e
t_cpd00235	0.00678839	2.0 Orthophosphate_c + 1.0 D_Mannose_6_phosphate_e = 1.0 D_Mannose_6_phosphate_c + 2.0 Orthophosphate_e
t_cpd00079	0.00678839	2.0 Orthophosphate_c + 1.0 D_Glucose_6_phosphate_e = 2.0 Orthophosphate_e + 1.0 D_Glucose_6_phosphate_c
rxn00412	0.00678839	1.0 L_Glutamine_c + 1.0 H2O_c + 1.0 UTP_c + 1.0 ATP_c = 1.0 CTP_c + 2.0 H__c + 1.0 Orthophosphate_c + 1.0 L_Glutamate_c + 1.0 ADP_c
rxn00085	0.00678839	2.0 L_Glutamate_c + 1.0 NADP__c = 1.0 L_Glutamine_c + 1.0 H__c + 1.0 2_Oxoglutarate_c + 1.0 NADPH_c
rxn01134	0.00662339	1.0 Maltose_c = 1.0 alpha_alpha_Trehalose_c
rxn11684	0.0065444	1.0 4_4__Diapophytoene_c = 2.0 trans_trans_Farnesyl_diphosphate_c
rxn10626	0.0065444	1.0 Isochorismate_c + 1.0 Succinate_semialdehyde_c = 1.0 Pyruvate_c + 1.0 2_Succinyl_6_hydroxy_2_4_cyclohexadiene_1_carboxylate_c
rxn08129	0.0065444	1.0 Maltohexaose_c + 1.0 Maltose_c = 1.0 D_Glucose_c + 1.0 Maltoheptaose_c
rxn08128	0.0065444	1.0 Maltopentaose_c + 1.0 Maltose_c = 1.0 Maltohexaose_c + 1.0 D_Glucose_c
rxn08127	0.0065444	1.0 Maltose_c + 1.0 Maltotetraose_c = 1.0 Maltopentaose_c + 1.0 D_Glucose_c
rxn08126	0.0065444	1.0 Maltotriose_c + 1.0 Maltose_c = 1.0 D_Glucose_c + 1.0 Maltotetraose_c
rxn05607	0.0065444	1.0 Maltose_e + 1.0 Phosphoenolpyruvate_c = 1.0 Pyruvate_c + 1.0 Maltose_6__phosphate_c
rxn04386	0.0065444	1.0 L_Threonine_c = 1.0 L_Threonine_O_3_phosphate_c
rxn00499	0.00650152	1.0 NAD__c + 1.0 _S__Lactate_c = 1.0 Pyruvate_c + 1.0 H__c + 1.0 NADH_c
rxn01987	0.00629674	1.0 2_Deoxy_D_ribose_5_phosphate_c + 1.0 ADP_c = 1.0 Deoxyribose_c + 1.0 ATP_c
rxn05596	0.00607633	1.0 Potassium_c + 1.0 H__e = 1.0 H__c + 1.0 Potassium_e
rxn01867	0.00605464	1.0 NAD__c + 1.0 H2O_c + 1.0 Betaine_aldehyde_c = 2.0 H__c + 1.0 NADH_c + 1.0 Betaine_c
rxn00452	0.00601519	1.0 S_Adenosyl_L_methionine_c + 1.0 L_Homocysteine_c = 1.0 H__c + 1.0 L_Methionine_c + 1.0 S_Adenosyl_L_homocysteine_c
rxn02914	0.00601332	1.0 2_Oxoglutarate_c + 1.0 phosphoserine_c = 1.0 L_Glutamate_c + 1.0 3_Phosphonooxypyruvate_c
rxn10306	0.0058317	1.0 Isohexadecanoyllipoteichoic_acid__n_24___linked__unsubstituted_c + 24.0 UDP_glucose_c = 24.0 UDP_c + 1.0 Isohexadecanoyllipoteichoic_acid__n_24___linked__glucose_substituted_c
rxn10305	0.0058317	1.0 Anteisopentadecanoyllipoteichoic_acid__n_24___linked__unsubstituted_c + 24.0 UDP_glucose_c = 24.0 UDP_c + 1.0 Anteisopentadecanoyllipoteichoic_acid__n_24___linked__glucose_substituted_c
rxn10304	0.0058317	1.0 Isopentadecanoyllipoteichoic_acid__n_24___linked__unsubstituted_c + 24.0 UDP_glucose_c = 24.0 UDP_c + 1.0 Isopentadecanoyllipoteichoic_acid__n_24___linked__glucose_substituted_c
rxn10303	0.0058317	24.0 UDP_glucose_c + 1.0 Isotetradecanoyllipoteichoic_acid__n_24___linked__unsubstituted_c = 24.0 UDP_c + 1.0 Isotetradecanoyllipoteichoic_acid__n_24___linked__glucose_substituted_c
rxn10299	0.0058317	1.0 Myristoyllipoteichoic_acid__n_24___linked__unsubstituted_c + 24.0 UDP_glucose_c = 24.0 UDP_c + 1.0 Myristoyllipoteichoic_acid__n_24___linked__glucose_substituted_c
rxn10298	0.0058317	1.0 Palmitoyllipoteichoic_acid__n_24___linked__unsubstituted_c + 24.0 UDP_glucose_c = 24.0 UDP_c + 1.0 Palmitoyllipoteichoic_acid__n_24___linked__glucose_substituted_c
t_cpd00224	0.00569174	1.0 L_Arabinose_e + 1.0 H2O_c + 1.0 ATP_c = 1.0 H__c + 1.0 Orthophosphate_c + 1.0 ADP_c + 1.0 L_Arabinose_c
rxn05173	0.00569174	1.0 L_Arabinose_e + 1.0 H2O_c + 1.0 ATP_c = 1.0 H__c + 1.0 Orthophosphate_c + 1.0 ADP_c + 1.0 L_Arabinose_c
rxn02268	0.00563442	2.0 2_Methylbutanoyl_CoA_c + 1.0 Oxygen_c = 2.0 H2O_c + 2.0 2_Methylbut_2_enoyl_CoA_c
rxn00508	0.00557319	1.0 NAD__c + 1.0 H2O_c + 1.0 Succinate_semialdehyde_c = 1.0 Succinate_c + 2.0 H__c + 1.0 NADH_c
rxn02518	0.00553489	1.0 dITP_c + 1.0 H2O_c = 1.0 2__Deoxyinosine_5__phosphate_c + 1.0 Diphosphate_c
rxn01962	0.00553489	1.0 H2O_c + 1.0 XTP_c = 1.0 Diphosphate_c + 1.0 Xanthosine_5__phosphate_c
rxn01351	0.00553489	1.0 H2O_c + 1.0 dGTP_c = 1.0 Diphosphate_c + 1.0 dGMP_c
rxn00514	0.00553489	1.0 H2O_c + 1.0 ITP_c = 1.0 Diphosphate_c + 1.0 IMP_c
rxn00463	0.00553489	1.0 H2O_c + 1.0 UTP_c = 1.0 UMP_c + 1.0 Diphosphate_c
rxn00301	0.00553489	1.0 H2O_c + 1.0 GTP_c = 1.0 Diphosphate_c + 1.0 GMP_c
rxn00183	0.00553489	1.0 NAD__c + 1.0 H2O_c + 1.0 L_Glutamate_5_semialdehyde_c = 2.0 H__c + 1.0 L_Glutamate_c + 1.0 NADH_c
rxn05158	0.00543818	1.0 H2O_c + 1.0 ATP_c + 1.0 sn_Glycerol_3_phosphate_e = 1.0 sn_Glycerol_3_phosphate_c + 1.0 Orthophosphate_c + 1.0 ADP_c + 1.0 H__c
rxn05494	0.0053027	1.0 D_Alanine_e + 1.0 H__e = 1.0 D_Alanine_c + 1.0 H__c
rxn05297	0.0052762	1.0 L_Glutamate_e + 1.0 H__e = 1.0 H__c + 1.0 L_Glutamate_c
rxn00016	0.00521925	1.0 H2O_c + 1.0 Chitobiose_c = 2.0 N_Acetyl_D_glucosamine_c
rxn05221	0.00512445	1.0 Sodium_e + 1.0 L_Proline_e = 1.0 L_Proline_c + 1.0 Sodium_c
rxn05649	0.00502699	1.0 D_Serine_e + 1.0 H__e = 1.0 H__c + 1.0 D_Serine_c
rxn05149	0.00488016	1.0 Manganese_e + 1.0 H2O_c + 1.0 ATP_c = 1.0 H__c + 1.0 Orthophosphate_c + 1.0 ADP_c + 1.0 Manganese_c
rxn09422	0.00487508	9.0 H__c + 1.0 Acetyl__acyl_carrier_protein__c + 3.0 Malonyl__acyl_carrier_protein__c + 6.0 NADPH_c = 3.0 H2O_c + 3.0 CO2_c + 1.0 Octanoyl__acp__c + 3.0 Acyl_carrier_protein_c + 6.0 NADP__c
rxn02985	0.00487508	1.0 6_Lactoyl_5_6_7_8_tetrahydropterin_c + 1.0 NADP__c = 1.0 6_Pyruvoyltetrahydropterin_c + 1.0 NADPH_c + 1.0 H__c
rxn01663	0.00487508	1.0 H2O_c + 1.0 N6__L_1_3_Dicarboxypropyl__L_lysine_c + 1.0 NADP__c = 1.0 L_2_Aminoadipate_6_semialdehyde_c + 1.0 L_Glutamate_c + 1.0 NADPH_c + 1.0 H__c
rxn01324	0.00487508	1.0 NADP__c + 1.0 Tetrahydrobiopterin_c = 1.0 H__c + 1.0 NADPH_c + 1.0 6_Lactoyl_5_6_7_8_tetrahydropterin_c
rxn00152	0.00487508	1.0 Pyruvate_c + 2.0 H__c + 1.0 Orthophosphate_c + 1.0 Oxygen_c = 1.0 Acetyl_phosphate_c + 1.0 H2O2_c + 1.0 CO2_c
rxn05104	0.00483729	1.0 S_Methyl_5_thio_D_ribulose_1_phosphate_c = 1.0 H2O_c + 1.0 2_3_Diketo_5_methylthiopentyl_1_phosphate_c
rxn05092	0.00483729	1.0 1_2_Dihydroxy_5__methylthio_pent_1_en_3_one_c + 1.0 Oxygen_c = 1.0 H__c + 1.0 4_Methylthio_2_oxobutanoic_acid_c + 1.0 Formate_c
rxn07587	0.00475789	1.0 Cobalt_precorrin_5B_c + 1.0 S_Adenosyl_L_methionine_c = 1.0 H__c + 1.0 S_Adenosyl_L_homocysteine_c + 1.0 Cobalt_precorrin_6_c
rxn03541	0.00472546	1.0 Adenosyl_cobyrinate_hexaamide_c + 1.0 _R__1_Aminopropan_2_ol_c = 1.0 H2O_c + 1.0 Adenosyl_cobinamide_c
rxn05209	0.00472107	1.0 Sodium_e + 1.0 H__c = 1.0 Sodium_c + 1.0 H__e
rxn00159	0.00471035	1.0 NAD__c + 1.0 _S__Malate_c = 1.0 Pyruvate_c + 1.0 CO2_c + 1.0 NADH_c
rxn01639	0.00460832	1.0 L_Glutamate_c + 1.0 Formamide_c = 1.0 H2O_c + 1.0 N_Formimino_L_glutamate_c
t_cpd00307	0.00455773	1.0 Cytosine_e + 1.0 H__e = 1.0 Cytosine_c + 1.0 H__c
rxn05527	0.00455773	1.0 Cytosine_e + 1.0 H__e = 1.0 Cytosine_c + 1.0 H__c
rxn03919	0.00454528	1.0 D_glycero_D_manno_Heptose_1_7_bisphosphate_c + 1.0 H2O_c = 1.0 D_glycero_D_manno_Heptose_1_phosphate_c + 1.0 H__c + 1.0 Orthophosphate_c
rxn02112	0.00450792	1.0 NAD__c + 1.0 _R_R__Butane_2_3_diol_c = 1.0 H__c + 1.0 NADH_c + 1.0 Acetoin_c
rxn00500	0.00448147	1.0 NAD__c + 1.0 _R__Lactate_c = 1.0 Pyruvate_c + 1.0 H__c + 1.0 NADH_c
rxn00691	0.00445858	1.0 10_Formyltetrahydrofolate_c + 1.0 H2O_c = 1.0 H__c + 1.0 Formate_c + 1.0 Tetrahydrofolate_c
rxn00605	0.00444174	1.0 D_Glucose_6_phosphate_c + 1.0 UDP_glucose_c = 1.0 UDP_c + 1.0 alpha_alpha__Trehalose_6_phosphate_c
rxn00671	0.00438024	1.0 NAD__c + 1.0 2_Methyl_3_oxopropanoate_c + 1.0 CoA_c = 1.0 NADH_c + 1.0 Propanoyl_CoA_c + 1.0 CO2_c
rxn03030	0.00426728	1.0 H2O_c + 1.0 Acetyl_CoA_c + 1.0 2_3_4_5_Tetrahydrodipicolinate_c = 1.0 CoA_c + 1.0 N_Acetyl_L_2_amino_6_oxopimelate_c
t_cpd00550	0.00425784	1.0 D_Serine_e + 1.0 H__e = 1.0 H__c + 1.0 D_Serine_c
t_cpd00117	0.00425784	1.0 D_Alanine_e + 1.0 H__e = 1.0 D_Alanine_c + 1.0 H__c
t_cpd00023	0.00422697	1.0 L_Glutamate_e + 1.0 H__e = 1.0 H__c + 1.0 L_Glutamate_c
rxn00775	0.0041093	1.0 H2O_c + 1.0 ADP_ribose_c = 1.0 AMP_c + 1.0 D_Ribose_5_phosphate_c
rxn01368	0.00401592	1.0 H__c + 1.0 H2O_c + 1.0 Cytidine_c = 1.0 NH3_c + 1.0 Uridine_c
rxn05571	0.00394377	1.0 D_Gluconic_acid_e + 1.0 H__e = 1.0 H__c + 1.0 D_Gluconic_acid_c
rxn11932	0.00391685	1.0 H__c + 1.0 p_Benzenediol_c + 2.0 Nitric_oxide_c = 1.0 H2O_c + 1.0 Nitrous_oxide_c + 1.0 p_Benzoquinone_c
rxn00137	0.00387314	1.0 Adenosine_3__5__bisphosphate_c + 1.0 H2O_c = 1.0 H__c + 1.0 Orthophosphate_c + 1.0 AMP_c
rxn06022	0.00387314	1.0 H2O_c + 1.0 Acyl_carrier_protein_c = 1.0 Apo__acyl_carrier_protein__c + 1.0 Pantetheine_4__phosphate_c
rxn02944	0.00381583	1.0 N2_Succinyl_L_ornithine_c + 1.0 2_Oxoglutarate_c = 1.0 L_Glutamate_c + 1.0 N_Succinyl_L_glutamate_5_semialdehyde_c
rxn02569	0.00380201	1.0 H2O_c + 1.0 Selenide_c + 1.0 ATP_c = 2.0 H__c + 1.0 Orthophosphate_c + 1.0 Selenophosphate_c + 1.0 AMP_c
rxn00423	0.00363611	1.0 Acetyl_CoA_c + 1.0 L_Serine_c = 1.0 CoA_c + 1.0 O_Acetyl_L_serine_c
rxn00744	0.00360667	1.0 Glycerone_c + 1.0 ATP_c = 1.0 Glycerone_phosphate_c + 1.0 ADP_c
t_cpd00797	0.00355376	1.0 _R__3_Hydroxybutanoate_e = 1.0 _R__3_Hydroxybutanoate_c
t_cpd00176	0.00355376	1.0 2_Dehydro_3_deoxy_D_gluconate_e + 1.0 H__e = 1.0 H__c + 1.0 2_Dehydro_3_deoxy_D_gluconate_c
rxn08783	0.00355376	1.0 _R__Lactate_c + 1.0 Ubiquinone_8_c = 1.0 Pyruvate_c + 1.0 Ubiquinol_8_c
rxn05117	0.00355376	1.0 L_Aspartate_c + 1.0 NADP__c = 1.0 Iminoaspartate_c + 1.0 NADPH_c + 2.0 H__c
rxn00146	0.00355376	1.0 _R__Lactate_c + 2.0 Ferricytochrome_c_c = 1.0 Pyruvate_c + 2.0 H__c + 2.0 Ferrocytochrome_c_c
rxn12405	0.00355376	1.0 _R__3_Hydroxybutanoate_e = 1.0 _R__3_Hydroxybutanoate_c
rxn05681	0.00355376	1.0 2_Dehydro_3_deoxy_D_gluconate_e + 1.0 H__e = 1.0 H__c + 1.0 2_Dehydro_3_deoxy_D_gluconate_c
t_cpd01080	0.00349469	1.0 Octadecanoic_acid_e + 1.0 H__e = 1.0 H__c + 1.0 Octadecanoic_acid_c
rxn10161	0.00349469	1.0 Octadecanoic_acid_e + 1.0 H__e = 1.0 H__c + 1.0 Octadecanoic_acid_c
rxn05207	0.00346854	1.0 Sodium_e + 1.0 _S__Malate_e = 1.0 _S__Malate_c + 1.0 Sodium_c
t_cpd00218	0.00346854	1.0 Nicotinate_e = 1.0 Nicotinate_c
rxn01636	0.00346854	1.0 L_Glutamate_c + 1.0 N_Acetylornithine_c = 1.0 N_Acetyl_L_glutamate_c + 1.0 L_Ornithine_c
t_cpd11595	0.00346804	1.0 chromate_c + 1.0 H__e = 1.0 H__c + 1.0 chromate_e
rxn04704	0.00346804	1.0 Coproporphyrinogen_III_c + 2.0 S_Adenosyl_L_methionine_c = 2.0 5__Deoxyadenosine_c + 2.0 CO2_c + 2.0 L_Methionine_c + 1.0 Protoporphyrinogen_IX_c
rxn05526	0.00346804	1.0 chromate_c + 1.0 H__e = 1.0 H__c + 1.0 chromate_e
rxn08656	0.00340218	1.0 Glycolate_c + 1.0 Menaquinone_8_c = 1.0 Glyoxylate_c + 1.0 Menaquinol_8_c
rxn05106	0.00340218	1.0 H2O_c + 1.0 2_Hydroxy_3_keto_5_methylthiopentenyl_1_phosphate_c = 1.0 H__c + 1.0 Orthophosphate_c + 1.0 1_2_Dihydroxy_5__methylthio_pent_1_en_3_one_c
rxn05105	0.00340218	1.0 H__c + 1.0 2_Hydroxy_3_keto_5_methylthiopentenyl_1_phosphate_c = 1.0 2_3_Diketo_5_methylthiopentyl_1_phosphate_c
rxn00222	0.00336913	1.0 Cellobiose_c + 1.0 H2O_c = 2.0 D_Glucose_c
rxn00020	0.00336913	1.0 Cellobiose_c + 1.0 H2O_c = 2.0 beta_D_Glucose_c
rxn05387	0.00333056	1.0 H__c + 1.0 5_methyl_trans_hex_2_enoyl_ACP_c + 1.0 NADPH_c = 1.0 5_methyl_hexanoyl_ACP_c + 1.0 NADP__c
rxn01388	0.00324022	1.0 Isocitrate_c = 1.0 H2O_c + 1.0 cis_Aconitate_c
rxn00974	0.00324022	1.0 Citrate_c = 1.0 H2O_c + 1.0 cis_Aconitate_c
rxn00973	0.00324022	1.0 Citrate_c = 1.0 Isocitrate_c
rxn09167	0.00323062	1.0 Pyruvate_c + 1.0 H2O_c + 1.0 Ubiquinone_8_c = 1.0 CO2_c + 1.0 Acetate_c + 1.0 Ubiquinol_8_c
t_cpd01092	0.00321524	1.0 _S_____Allantoin_e + 1.0 H__e = 1.0 H__c + 1.0 _S_____Allantoin_c
t_cpd00092	0.00321524	1.0 Uracil_e + 1.0 H__e = 1.0 Uracil_c + 1.0 H__c
rxn09657	0.00321524	1.0 Thiamine_e + 1.0 H__e = 1.0 H__c + 1.0 Thiamine_c
rxn05682	0.00321524	1.0 _S_____Allantoin_e + 1.0 H__e = 1.0 H__c + 1.0 _S_____Allantoin_c
rxn00182	0.00317322	1.0 NAD__c + 1.0 H2O_c + 1.0 L_Glutamate_c = 1.0 H__c + 1.0 2_Oxoglutarate_c + 1.0 NADH_c + 1.0 NH3_c
rxn05307	0.00314236	1.0 L_Serine_e + 1.0 H__e = 1.0 H__c + 1.0 L_Serine_c
rxn03534	0.00305033	1.0 H2O_c + 1.0 Precorrin_5_c + 1.0 S_Adenosyl_L_methionine_c = 2.0 H__c + 1.0 S_Adenosyl_L_homocysteine_c + 1.0 Acetate_c + 1.0 Precorrin_6X_c
rxn05168	0.00291974	1.0 H2O_c + 1.0 L_Valine_e + 1.0 ATP_c = 1.0 H__c + 1.0 Orthophosphate_c + 1.0 L_Valine_c + 1.0 ADP_c
rxn05161	0.00291974	1.0 H2O_c + 1.0 ATP_c + 1.0 L_Leucine_e = 1.0 H__c + 1.0 Orthophosphate_c + 1.0 ADP_c + 1.0 L_Leucine_c
rxn08333	0.00291443	1.0 H__c + 1.0 all_trans_Octaprenyl_diphosphate_c + 1.0 1_4_Dihydroxy_2_naphthoate_c = 1.0 Diphosphate_c + 1.0 CO2_c + 1.0 2_Demethylmenaquinol_8_c
rxn03644	0.00288345	1.0 D_arabino_Hex_3_ulose_6_phosphate_c = 1.0 D_Fructose_6_phosphate_c
rxn03643	0.00288345	1.0 Formaldehyde_c + 1.0 D_Ribulose_5_phosphate_c = 1.0 D_arabino_Hex_3_ulose_6_phosphate_c
rxn00321	0.00283539	1.0 L_Lysine_c = 1.0 _3S__3_6_Diaminohexanoate_c
rxn06874	0.00281647	16.0 H2O_c + 8.0 Reduced_ferredoxin_c + 16.0 ATP_c + 1.0 Nitrogen_c = 1.0 Hydrogen_c + 16.0 Orthophosphate_c + 8.0 Oxidized_ferredoxin_c + 2.0 NH3_c + 16.0 ADP_c + 6.0 H__c
rxn00926	0.00281647	1.0 H__c + 1.0 H2O_c + 1.0 Adenine_c = 1.0 NH3_c + 1.0 Hypoxanthine_c
rxn00202	0.00281647	1.0 H2O_c + 1.0 Acetyl_CoA_c + 1.0 2_Oxoglutarate_c = 1.0 H__c + 1.0 CoA_c + 1.0 2_Hydroxybutane_1_2_4_tricarboxylate_c
rxn06075	0.00278215	1.0 UDP_c + 1.0 trdrd_c = 1.0 H2O_c + 1.0 trdox_c + 1.0 dUDP_c
rxn05233	0.00278215	1.0 GDP_c + 1.0 trdrd_c = 1.0 H2O_c + 1.0 dGDP_c + 1.0 trdox_c
t_cpd00063	0.00272236	1.0 H2O_c + 1.0 Calcium_e + 1.0 ATP_c = 1.0 H__c + 1.0 Orthophosphate_c + 1.0 Calcium_c + 1.0 ADP_c
rxn01219	0.00272236	1.0 dCMP_c + 1.0 ATP_c = 1.0 ADP_c + 1.0 dCDP_c
rxn03953	0.00267532	1.0 NAD__c + 1.0 L_Idonate_c = 1.0 H__c + 1.0 NADH_c + 1.0 5_Dehydro_D_gluconate_c
rxn00438	0.00262334	1.0 Thiamin_monophosphate_c + 1.0 ATP_c = 1.0 Thiamin_diphosphate_c + 1.0 ADP_c
rxn03057	0.00262032	1.0 S_Methyl_5_thio_D_ribose_1_phosphate_c = 1.0 S_Methyl_5_thio_D_ribulose_1_phosphate_c
rxn00196	0.00260542	1.0 H2O_c + 1.0 2_5_Dioxopentanoate_c + 1.0 NADP__c = 2.0 H__c + 1.0 2_Oxoglutarate_c + 1.0 NADPH_c
t_cpd00540	0.00260316	1.0 Betaine_e + 1.0 H2O_c + 1.0 ATP_c = 1.0 H__c + 1.0 Orthophosphate_c + 1.0 ADP_c + 1.0 Betaine_c
rxn00715	0.00256982	1.0 ITP_c + 1.0 Uridine_c = 1.0 UMP_c + 1.0 IDP_c
rxn00713	0.00256982	1.0 GTP_c + 1.0 Uridine_c = 1.0 UMP_c + 1.0 GDP_c
rxn00709	0.00256982	1.0 ATP_c + 1.0 Uridine_c = 1.0 UMP_c + 1.0 ADP_c
rxn00369	0.00256982	1.0 GTP_c + 1.0 Cytidine_c = 1.0 GDP_c + 1.0 CMP_c
rxn00368	0.00256982	1.0 UTP_c + 1.0 Cytidine_c = 1.0 UDP_c + 1.0 CMP_c
rxn00365	0.00256982	1.0 ATP_c + 1.0 Cytidine_c = 1.0 ADP_c + 1.0 CMP_c
rxn01648	0.00253012	1.0 H__c + 1.0 Orthophosphate_c + 1.0 Cytidine_c = 1.0 Cytosine_c + 1.0 alpha_D_Ribose_1_phosphate_c
rxn00560	0.00253012	1.0 Urea_c + 1.0 HCO3__c + 1.0 ATP_c = 1.0 H__c + 1.0 Orthophosphate_c + 1.0 Urea_1_carboxylate_c + 1.0 ADP_c
rxn00533	0.00249998	1.0 Acetyl_CoA_c + 1.0 HCO3__c + 1.0 ATP_c = 1.0 H__c + 1.0 Orthophosphate_c + 1.0 ADP_c + 1.0 Malonyl_CoA_c
rxn00598	0.00240458	1.0 Succinyl_CoA_c + 1.0 Acetyl_CoA_c = 1.0 3_Oxoadipyl_CoA_c + 1.0 CoA_c
rxn03393	0.00224843	1.0 H__c + 1.0 3_Octaprenyl_4_hydroxybenzoate_c = 1.0 CO2_c + 1.0 2_Octaprenylphenol_c
rxn01171	0.00218318	1.0 D_Glucose_c = 1.0 beta_D_Glucose_c
t_cpd00080	0.00216249	1.0 H2O_c + 1.0 ATP_c + 1.0 sn_Glycerol_3_phosphate_e = 1.0 sn_Glycerol_3_phosphate_c + 1.0 Orthophosphate_c + 1.0 ADP_c + 1.0 H__c
rxn00501	0.0021174	1.0 NAD__c + 1.0 CoA_c + 1.0 3_Oxopropanoate_c = 1.0 NADH_c + 1.0 CO2_c + 1.0 Acetyl_CoA_c
rxn01859	0.00210333	1.0 H__c + 1.0 Orthophosphate_c + 1.0 Deoxyadenosine_c = 1.0 Adenine_c + 1.0 2_Deoxy_D_ribose_1_phosphate_c
rxn01799	0.00210333	1.0 H__c + 1.0 Orthophosphate_c + 1.0 Deoxyuridine_c = 1.0 Uracil_c + 1.0 2_Deoxy_D_ribose_1_phosphate_c
rxn01647	0.00210333	1.0 Orthophosphate_c + 1.0 Nicotinate_D_ribonucleoside_c = 1.0 Nicotinate_c + 1.0 alpha_D_Ribose_1_phosphate_c
rxn01646	0.00210333	1.0 N_Ribosylnicotinamide_c + 1.0 Orthophosphate_c = 1.0 Nicotinamide_c + 1.0 alpha_D_Ribose_1_phosphate_c
rxn01548	0.00210333	1.0 H__c + 1.0 Orthophosphate_c + 1.0 Guanosine_c = 1.0 Guanine_c + 1.0 alpha_D_Ribose_1_phosphate_c
rxn01358	0.00210333	1.0 H__c + 1.0 Orthophosphate_c + 1.0 Inosine_c = 1.0 Hypoxanthine_c + 1.0 alpha_D_Ribose_1_phosphate_c
rxn01138	0.00210333	1.0 H__c + 1.0 Orthophosphate_c + 1.0 Adenosine_c = 1.0 Adenine_c + 1.0 alpha_D_Ribose_1_phosphate_c
rxn03918	0.00203638	1.0 D_glycero_D_manno_Heptose_7_phosphate_c + 1.0 ATP_c = 1.0 D_glycero_D_manno_Heptose_1_7_bisphosphate_c + 1.0 ADP_c
rxn03916	0.00203638	1.0 D_glycero_D_manno_Heptose_1_phosphate_c + 1.0 ATP_c = 1.0 Diphosphate_c + 1.0 ADP_D_glycero_D_manno_heptose_c
rxn05514	0.00202454	1.0 Calcium_c + 1.0 H__e = 1.0 H__c + 1.0 Calcium_e
t_cpd00129	0.00194336	1.0 Sodium_e + 1.0 L_Proline_e = 1.0 L_Proline_c + 1.0 Sodium_c
rxn00211	0.00187706	2.0 NAD__c + 1.0 H2O_c + 1.0 UDP_glucose_c = 3.0 H__c + 1.0 UDP_glucuronate_c + 2.0 NADH_c
t_cpd00149	0.00185635	1.0 Cobalt_e = 1.0 Cobalt_c
rxn00242	0.00172732	1.0 H2O_c + 1.0 Guanosine_3__5__bis_diphosphate__c = 1.0 Diphosphate_c + 1.0 GDP_c
rxn05582	0.0017236	1.0 Glycine_e + 1.0 H__e = 1.0 H__c + 1.0 Glycine_c
rxn00695	0.00164909	1.0 ATP_c + 1.0 D_Glucose_1_phosphate_c = 1.0 Diphosphate_c + 1.0 ADP_glucose_c
rxn08801	0.00163526	1.0 1_octadecanoyl_sn_glycerol_3_phosphate_c + 1.0 H2O_c = 1.0 sn_Glycerol_3_phosphate_c + 1.0 Octadecanoic_acid_c + 1.0 H__c
rxn00312	0.00159751	1.0 L_Lysine_c + 1.0 Oxygen_c = 1.0 5_Aminopentanamide_c + 1.0 H2O_c + 1.0 CO2_c
t_cpd00118	0.00159091	1.0 H2O_c + 1.0 Putrescine_e + 1.0 ATP_c = 1.0 H__c + 1.0 Orthophosphate_c + 1.0 Putrescine_c + 1.0 ADP_c
rxn05175	0.00159091	1.0 H2O_c + 1.0 Spermidine_e + 1.0 ATP_c = 1.0 H__c + 1.0 Orthophosphate_c + 1.0 Spermidine_c + 1.0 ADP_c
rxn05163	0.00159091	1.0 H2O_c + 1.0 Putrescine_e + 1.0 ATP_c = 1.0 H__c + 1.0 Orthophosphate_c + 1.0 Putrescine_c + 1.0 ADP_c
rxn02339	0.00158555	1.0 2_Oxoglutarate_c + 1.0 4_Hydroxy_L_glutamate_c = 1.0 4_Hydroxy_2_oxoglutarate_c + 1.0 L_Glutamate_c
rxn04989	0.00153596	1.0 L_Phenylalanine_c + 1.0 Oxygen_c + 1.0 Tetrahydrobiopterin_c = 1.0 L_Tyrosine_c + 1.0 _6R__6__L_erythro_1_2_Dihydroxypropyl__5_6_7_8_tetrahydro_4a__hydroxypterin_c
rxn01315	0.00153596	1.0 L_Phenylalanine_c + 1.0 Oxygen_c + 1.0 Tetrahydrobiopterin_c = 1.0 H2O_c + 1.0 Dihydrobiopterin_c + 1.0 L_Tyrosine_c
rxn00509	0.00147379	1.0 H2O_c + 1.0 Succinate_semialdehyde_c + 1.0 NADP__c = 1.0 Succinate_c + 2.0 H__c + 1.0 NADPH_c
rxn00171	0.00147379	1.0 NAD__c + 1.0 CoA_c + 1.0 Acetaldehyde_c = 1.0 H__c + 1.0 NADH_c + 1.0 Acetyl_CoA_c
rxn01304	0.00147379	1.0 Succinyl_CoA_c + 1.0 L_Homoserine_c = 1.0 CoA_c + 1.0 O_Succinyl_L_homoserine_c
rxn03630	0.00143828	1.0 2_Oxoglutarate_c + 1.0 Taurine_c + 1.0 Oxygen_c = 1.0 Succinate_c + 1.0 Sulfite_c + 1.0 Aminoacetaldehyde_c + 1.0 CO2_c
t_cpd03424	0.00143114	1.0 Vitamin_B12_e + 1.0 H2O_c + 1.0 ATP_c = 1.0 H__c + 1.0 Orthophosphate_c + 1.0 ADP_c + 1.0 Vitamin_B12_c
t_cpd00635	0.00143114	1.0 Cob_I_alamin_e + 1.0 H2O_c + 1.0 ATP_c = 1.0 H__c + 1.0 Orthophosphate_c + 1.0 ADP_c + 1.0 Cob_I_alamin_c
t_cpd00423	0.00143114	1.0 H2O_c + 1.0 ATP_c + 1.0 Cob_II_alamin_e = 1.0 Cob_II_alamin_c + 1.0 Orthophosphate_c + 1.0 ADP_c + 1.0 H__c
rxn10147	0.00143114	1.0 Cob_I_alamin_e + 1.0 H2O_c + 1.0 ATP_c = 1.0 H__c + 1.0 Orthophosphate_c + 1.0 ADP_c + 1.0 Cob_I_alamin_c
rxn05515	0.00143114	1.0 H2O_c + 1.0 ATP_c + 1.0 Cob_II_alamin_e = 1.0 Cob_II_alamin_c + 1.0 Orthophosphate_c + 1.0 ADP_c + 1.0 H__c
rxn05187	0.00143114	1.0 Vitamin_B12_e + 1.0 H2O_c + 1.0 ATP_c = 1.0 H__c + 1.0 Orthophosphate_c + 1.0 ADP_c + 1.0 Vitamin_B12_c
rxn05287	0.00134705	1.0 Isopentenyl_diphosphate_c + 1.0 Geranylgeranyl_diphosphate_c = 1.0 Diphosphate_c + 1.0 all_trans_Pentaprenyl_diphosphate_c
rxn03892	0.00134705	1.0 Isopentenyl_diphosphate_c + 1.0 all_trans_Pentaprenyl_diphosphate_c = 1.0 Diphosphate_c + 1.0 all_trans_Hexaprenyl_diphosphate_c
rxn03891	0.00134705	1.0 Isopentenyl_diphosphate_c + 1.0 all_trans_Hexaprenyl_diphosphate_c = 1.0 all_trans_Heptaprenyl_diphosphate_c + 1.0 Diphosphate_c
rxn05197	0.00130649	1.0 Uracil_e + 1.0 H__e = 1.0 Uracil_c + 1.0 H__c
t_cpd00054	0.00130566	1.0 L_Serine_e + 1.0 H__e = 1.0 H__c + 1.0 L_Serine_c
rxn00422	0.00127623	1.0 Pyruvate_c + 1.0 L_Serine_c = 1.0 L_Alanine_c + 1.0 Hydroxypyruvate_c
rxn00272	0.00127623	1.0 L_Alanine_c + 1.0 Glyoxylate_c = 1.0 Pyruvate_c + 1.0 Glycine_c
rxn02122	0.00127623	1.0 NAD__c + 2.0 H2O_c + 1.0 D_Glucuronolactone_c = 3.0 H__c + 1.0 D_Glucarate_c + 1.0 NADH_c
rxn00777	0.00123087	1.0 D_Ribose_5_phosphate_c = 1.0 D_Ribulose_5_phosphate_c
rxn02322	0.00123087	1.0 _R__5_Phosphomevalonate_c + 1.0 ATP_c = 1.0 _R__5_Diphosphomevalonate_c + 1.0 ADP_c
rxn01501	0.00123087	2.0 H__c + 2.0 NADPH_c + 1.0 _S__3_Hydroxy_3_methylglutaryl_CoA_c = 1.0 _R__Mevalonate_c + 1.0 CoA_c + 2.0 NADP__c
rxn00829	0.00123087	1.0 _R__5_Diphosphomevalonate_c + 1.0 ATP_c = 1.0 Isopentenyl_diphosphate_c + 1.0 Orthophosphate_c + 1.0 CO2_c + 1.0 ADP_c
rxn01450	0.00123087	1.0 Indolepyruvate_c + 1.0 H__c = 1.0 CO2_c + 1.0 Indole_3_acetaldehyde_c
rxn05370	0.00115329	1.0 H__c + 1.0 8_methyl_trans_dec_2_enoyl_ACP_c + 1.0 NADPH_c = 1.0 8_methyl_decanoyl_ACP_c + 1.0 NADP__c
rxn10167	0.00114545	1.0 L_Idonate_e + 1.0 H__e = 1.0 L_Idonate_c + 1.0 H__c
rxn01573	0.00110578	1.0 NAD__c + 1.0 H2O_c + 1.0 L_Isoleucine_c = 1.0 H__c + 1.0 _S__3_Methyl_2_oxopentanoic_acid_c + 1.0 NADH_c + 1.0 NH3_c
rxn01045	0.00110578	1.0 NAD__c + 1.0 H2O_c + 1.0 L_Valine_c = 1.0 3_Methyl_2_oxobutanoic_acid_c + 1.0 NADH_c + 1.0 NH3_c + 1.0 H__c
rxn00804	0.00110578	1.0 NAD__c + 1.0 L_Leucine_c + 1.0 H2O_c = 1.0 4_Methyl_2_oxopentanoate_c + 1.0 H__c + 1.0 NADH_c + 1.0 NH3_c
rxn05602	0.00107092	1.0 _S__Lactate_e + 1.0 H__e = 1.0 H__c + 1.0 _S__Lactate_c
rxn05938	0.00104885	1.0 H__c + 1.0 CO2_c + 1.0 Acetyl_CoA_c + 1.0 Reduced_ferredoxin_c = 1.0 Pyruvate_c + 1.0 Oxidized_ferredoxin_c + 1.0 CoA_c
rxn01102	0.000936556	1.0 D_Glycerate_c + 1.0 ATP_c = 1.0 ADP_c + 1.0 3_Phospho_D_glycerate_c
rxn01437	0.000867435	1.0 L_Formylkynurenine_c + 1.0 H2O_c = 1.0 H__c + 1.0 L_Kynurenine_c + 1.0 Formate_c
rxn01438	0.000850376	1.0 H__c + 1.0 L_Kynurenine_c + 1.0 NADPH_c + 1.0 Oxygen_c = 1.0 H2O_c + 1.0 3_Hydroxy_L_kynurenine_c + 1.0 NADP__c
rxn08979	0.000850376	1.0 H__c + 1.0 2_Demethylmenaquinone_8_c + 1.0 NADPH_c = 1.0 2_Demethylmenaquinol_8_c + 1.0 NADP__c
rxn08978	0.000850376	1.0 H__c + 1.0 Menaquinone_8_c + 1.0 NADPH_c = 1.0 Menaquinol_8_c + 1.0 NADP__c
rxn08977	0.000850376	1.0 H__c + 1.0 NADPH_c + 1.0 Ubiquinone_8_c = 1.0 Ubiquinol_8_c + 1.0 NADP__c
rxn06023	0.000822795	1.0 Apo__acyl_carrier_protein__c + 1.0 CoA_c = 1.0 Adenosine_3__5__bisphosphate_c + 1.0 Acyl_carrier_protein_c
rxn05403	0.000821898	1.0 13_methyl_trans_tetra_dec_2_enoyl_ACP_c + 1.0 H__c + 1.0 NADPH_c = 1.0 13_methyl_tetra_decanoyl_ACP_c + 1.0 NADP__c
rxn05206	0.000815872	1.0 Potassium_e = 1.0 Potassium_c
rxn00816	0.000806195	1.0 H2O_c + 1.0 Lactose_c = 1.0 D_Glucose_c + 1.0 D_Galactose_c
rxn00285	0.000793951	1.0 Succinate_c + 1.0 CoA_c + 1.0 ATP_c = 1.0 Orthophosphate_c + 1.0 Succinyl_CoA_c + 1.0 ADP_c
rxn02113	0.000793951	1.0 H__c + 1.0 2_Acetolactate_c = 1.0 CO2_c + 1.0 Acetoin_c
rxn01297	0.000777364	1.0 NAD__c + 1.0 H2O_c + 1.0 Hypoxanthine_c = 1.0 Xanthine_c + 1.0 NADH_c + 1.0 H__c
rxn09979	0.000751029	1.0 H2O_c + 1.0 beta_Methylglucoside_c = 1.0 Methanol_c + 1.0 D_Glucose_c
rxn09978	0.000751029	1.0 H2O_c + 1.0 alpha_Methyl_D_glucoside_c = 1.0 Methanol_c + 1.0 D_Glucose_c
rxn00547	0.000747279	1.0 ATP_c + 1.0 D_Fructose_c = 1.0 D_Fructose_6_phosphate_c + 1.0 ADP_c
rxn05399	0.000676563	1.0 H__c + 1.0 11_methyl_trans_dodec_2_enoyl_ACP_c + 1.0 NADPH_c = 1.0 11_methyl_dodecanoyl_ACP_c + 1.0 NADP__c
rxn05366	0.000676563	1.0 H__c + 1.0 6_methyl_trans_oct_2_enoyl_ACP_c + 1.0 NADPH_c = 1.0 6_methyl_octanoyl_ACP_c + 1.0 NADP__c
rxn01635	0.000675992	1.0 H__c + 1.0 H2O_c + 1.0 1_Pyrroline_4_hydroxy_2_carboxylate_c = 1.0 2_5_Dioxopentanoate_c + 1.0 NH3_c
rxn00336	0.000663875	1.0 Isocitrate_c = 1.0 Succinate_c + 1.0 Glyoxylate_c
rxn07584	0.000654754	1.0 H__c + 1.0 Lipoate_c + 1.0 ATP_c = 1.0 Lipoyl_AMP_c + 1.0 Diphosphate_c
rxn00479	0.000620125	1.0 L_Tryptophan_c + 1.0 Oxygen_c = 1.0 _Indol_3_yl_acetamide_c + 1.0 H2O_c + 1.0 CO2_c
rxn00792	0.000572174	1.0 Diphosphate_c + 1.0 Biotinyl_5__AMP_c = 1.0 Biotin_c + 1.0 ATP_c + 1.0 H__c
rxn05181	0.000546455	1.0 Betaine_e + 1.0 H2O_c + 1.0 ATP_c = 1.0 H__c + 1.0 Orthophosphate_c + 1.0 ADP_c + 1.0 Betaine_c
rxn01649	0.000524535	1.0 H__c + 1.0 Orthophosphate_c + 1.0 Xanthosine_c = 1.0 Xanthine_c + 1.0 alpha_D_Ribose_1_phosphate_c
rxn00151	0.000509918	1.0 Pyruvate_c + 1.0 H__c + 1.0 Orthophosphate_c + 1.0 ATP_c = 1.0 Diphosphate_c + 1.0 AMP_c + 1.0 Phosphoenolpyruvate_c
rxn03975	0.000454208	1.0 NADPH_c + 1.0 FMN_c + 1.0 H__c = 1.0 flavin_mononucleotide_reduced_c + 1.0 NADP__c
t_cpd00281	0.000446244	1.0 4_Aminobutanoate_e + 1.0 H__e = 1.0 H__c + 1.0 4_Aminobutanoate_c
rxn01748	0.00040681	1.0 _S_____Allantoin_c + 1.0 H2O_c = 1.0 H__c + 1.0 Allantoate_c
rxn04020	0.000378796	1.0 H__c + 1.0 Orthophosphate_c + 1.0 alpha_alpha__Trehalose_6_phosphate_c = 1.0 D_Glucose_6_phosphate_c + 1.0 beta_D_Glucose_1_phosphate_c
rxn05391	0.000351382	1.0 7_methyl_trans_oct_2_enoyl_ACP_c + 1.0 NADPH_c + 1.0 H__c = 1.0 7_methyl_octanoyl_ACP_c + 1.0 NADP__c
rxn10447	0.00034058	1.0 H2O_c + 1.0 Calcium_e + 1.0 ATP_c = 1.0 H__c + 1.0 Orthophosphate_c + 1.0 Calcium_c + 1.0 ADP_c
rxn02279	0.000334519	1.0 L_Gulono_1_4_lactone_c + 1.0 Oxygen_c = 1.0 L_xylo_Hexulonolactone_c + 1.0 H2O2_c
rxn00449	0.000334519	1.0 H__c + 1.0 Ascorbate_c = 1.0 L_xylo_Hexulonolactone_c
rxn07307	0.000329061	1.0 _2R__O_Phospho_3_sulfolactate_c = 1.0 Sulfite_c + 1.0 Phosphoenolpyruvate_c
rxn00950	0.000329061	1.0 H2O_c + 1.0 Cystathionine_c = 1.0 Pyruvate_c + 1.0 NH3_c + 1.0 L_Homocysteine_c
rxn00830	0.000312947	1.0 Isopentenyl_diphosphate_c = 1.0 Dimethylallyl_diphosphate_c
rxn05407	0.000282022	1.0 H__c + 1.0 NADPH_c + 1.0 15_methyl_trans_hexa_dec_2_enoyl_ACP_c = 1.0 15_methyl_hexa_decanoyl_ACP_c + 1.0 NADP__c
rxn05382	0.000280147	1.0 H__c + 1.0 14_methyl_trans_hexa_dec_2_enoyl_ACP_c + 1.0 NADPH_c = 1.0 14_methyl_hexa_decanoyl_ACP_c + 1.0 NADP__c
rxn10124	0.0002767	3.8 H__c + 1.0 2_Demethylmenaquinone_8_c + 1.0 NADH_c = 1.0 NAD__c + 1.0 2_Demethylmenaquinol_8_c + 2.8 H__e
rxn05374	0.000221886	1.0 10_methyl_trans_dodec_2_enoyl_ACP_c + 1.0 NADPH_c + 1.0 H__c = 1.0 10_methyl_dodecanoyl_ACP_c + 1.0 NADP__c
rxn03884	0.000207185	1.0 2_Dehydro_3_deoxy_6_phospho_D_gluconate_c = 1.0 Pyruvate_c + 1.0 D_Glyceraldehyde_3_phosphate_c
rxn05463	0.000199285	1.0 trans_Octodec_2_enoyl_ACP_c + 1.0 NADPH_c + 1.0 H__c = 1.0 Octodecanoyl_ACP_c + 1.0 NADP__c
rxn05432	0.000199285	1.0 H__c + 1.0 14_methyl_trans_pentadec_2_enoyl_ACP_c + 1.0 NADPH_c = 1.0 NADP__c + 1.0 14_methyl_pentadecanoyl_ACP_c
rxn05428	0.000199285	1.0 H__c + 1.0 12_methyl_trans_tridec_2_enoyl_ACP_c + 1.0 NADPH_c = 1.0 12_methyl_tridecanoyl_ACP_c + 1.0 NADP__c
rxn05424	0.000199285	1.0 H__c + 1.0 10_methyl_trans_undec_2_enoyl_ACP_c + 1.0 NADPH_c = 1.0 10_methyl_undecanoyl_ACP_c + 1.0 NADP__c
rxn05420	0.000199285	1.0 H__c + 1.0 8_methyl_trans_non_2_enoyl_ACP_c + 1.0 NADPH_c = 1.0 8_methyl_nonanoyl_ACP_c + 1.0 NADP__c
rxn05416	0.000199285	1.0 NADPH_c + 1.0 6_methyl_trans_hept_2_enoyl_ACP_c + 1.0 H__c = 1.0 6_methyl_heptanoyl_ACP_c + 1.0 NADP__c
rxn05412	0.000199285	1.0 4_methyl_trans_pent_2_enoyl_ACP_c + 1.0 H__c + 1.0 NADPH_c = 1.0 4_methyl_pentanoyl_ACP_c + 1.0 NADP__c
rxn05357	0.000199285	1.0 H__c + 1.0 trans_Hex_2_enoyl__acp__c + 1.0 NADPH_c = 1.0 Hexanoyl__acp__c + 1.0 NADP__c
rxn05356	0.000199285	1.0 trans_Dec_2_enoyl__acp__c + 1.0 H__c + 1.0 NADPH_c = 1.0 Decanoyl__acp__c + 1.0 NADP__c
rxn05355	0.000199285	1.0 H__c + 1.0 NADPH_c + 1.0 trans_Dodec_2_enoyl__acp__c = 1.0 Dodecanoyl__acyl_carrier_protein__c + 1.0 NADP__c
rxn05354	0.000199285	1.0 trans_Hexadec_2_enoyl__acp__c + 1.0 H__c + 1.0 NADPH_c = 1.0 Hexadecanoyl__acp__c + 1.0 NADP__c
rxn05353	0.000199285	1.0 But_2_enoyl__acyl_carrier_protein__c + 1.0 NADPH_c + 1.0 H__c = 1.0 NADP__c + 1.0 Butyryl__acp__c
rxn05352	0.000199285	1.0 H__c + 1.0 trans_Oct_2_enoyl__acp__c + 1.0 NADPH_c = 1.0 Octanoyl__acp__c + 1.0 NADP__c
rxn05351	0.000199285	1.0 H__c + 1.0 NADPH_c + 1.0 trans_Tetradec_2_enoyl__acp__c = 1.0 Tetradecanoyl__acp__c + 1.0 NADP__c
rxn05231	0.00019059	1.0 trdrd_c + 1.0 ADP_c = 1.0 dADP_c + 1.0 H2O_c + 1.0 trdox_c
t_cpd00069	0.000184567	1.0 L_Tyrosine_e + 1.0 H__e = 1.0 H__c + 1.0 L_Tyrosine_c
t_cpd00066	0.000184567	1.0 L_Phenylalanine_e + 1.0 H__e = 1.0 H__c + 1.0 L_Phenylalanine_c
rxn05663	0.000184567	1.0 L_Tryptophan_e + 1.0 H__e = 1.0 L_Tryptophan_c + 1.0 H__c
rxn05306	0.000184567	1.0 L_Phenylalanine_e + 1.0 H__e = 1.0 H__c + 1.0 L_Phenylalanine_c
rxn05301	0.000184567	1.0 L_Tyrosine_e + 1.0 H__e = 1.0 H__c + 1.0 L_Tyrosine_c
rxn10315	0.000147803	1.0 Isohexadecanoyllipoteichoic_acid__n_24___linked__unsubstituted_c + 24.0 UDP_N_acetyl_D_glucosamine_c = 24.0 UDP_c + 1.0 Isohexadecanoyllipoteichoic_acid__n_24___linked__N_acetyl_D_glucosamine_c
rxn10314	0.000147803	24.0 UDP_N_acetyl_D_glucosamine_c + 1.0 Anteisopentadecanoyllipoteichoic_acid__n_24___linked__unsubstituted_c = 1.0 Anteisopentadecanoyllipoteichoic_acid__n_24___linked__N_acetyl_D_glucosamine_c + 24.0 UDP_c
rxn10313	0.000147803	24.0 UDP_N_acetyl_D_glucosamine_c + 1.0 Isopentadecanoyllipoteichoic_acid__n_24___linked__unsubstituted_c = 1.0 Isopentadecanoyllipoteichoic_acid__n_24___linked__N_acetyl_D_glucosamine_c + 24.0 UDP_c
rxn10312	0.000147803	24.0 UDP_N_acetyl_D_glucosamine_c + 1.0 Isotetradecanoyllipoteichoic_acid__n_24___linked__unsubstituted_c = 24.0 UDP_c + 1.0 Isotetradecanoyllipoteichoic_acid__n_24___linked__N_acetyl_D_glucosamine_c
rxn10308	0.000147803	24.0 UDP_N_acetyl_D_glucosamine_c + 1.0 Myristoyllipoteichoic_acid__n_24___linked__unsubstituted_c = 24.0 UDP_c + 1.0 Myristoyllipoteichoic_acid__n_24___linked__N_acetyl_D_glucosamine_c
rxn10307	0.000147803	24.0 UDP_N_acetyl_D_glucosamine_c + 1.0 Palmitoyllipoteichoic_acid__n_24___linked__unsubstituted_c = 24.0 UDP_c + 1.0 Palmitoyllipoteichoic_acid__n_24___linked__N_acetyl_D_glucosamine_c
rxn06673	0.000146126	1.0 Acetyl_CoA_c + 1.0 Carboxybiotin_carboxyl_carrier_protein_c = 1.0 Holo__carboxylase__c + 1.0 Malonyl_CoA_c
rxn00711	0.000146126	1.0 Uracil_c + 1.0 5_Phospho_alpha_D_ribose_1_diphosphate_c = 1.0 UMP_c + 1.0 Diphosphate_c
rxn00692	0.000146126	1.0 H2O_c + 1.0 5_10_Methylenetetrahydrofolate_c + 1.0 Glycine_c = 1.0 Tetrahydrofolate_c + 1.0 L_Serine_c
rxn00604	0.000146126	1.0 D_Glucose_6_phosphate_c + 1.0 NADP__c = 1.0 D_Glucono_1_5_lactone_6_phosphate_c + 1.0 H__c + 1.0 NADPH_c
rxn01544	0.000146126	1.0 Xanthine_c + 1.0 5_Phospho_alpha_D_ribose_1_diphosphate_c = 1.0 Diphosphate_c + 1.0 Xanthosine_5__phosphate_c
rxn00915	0.000146126	1.0 5_Phospho_alpha_D_ribose_1_diphosphate_c + 1.0 Guanine_c = 1.0 Diphosphate_c + 1.0 GMP_c
rxn02046	0.000145684	1.0 H2O_c + 1.0 D_O_Phosphoserine_c = 1.0 H__c + 1.0 Orthophosphate_c + 1.0 D_Serine_c
rxn05378	0.000132299	1.0 H__c + 1.0 12_methyl_trans_tetra_dec_2_enoyl_ACP_c + 1.0 NADPH_c = 1.0 12_methyl_tetra_decanoyl_ACP_c + 1.0 NADP__c
rxn05618	0.000128996	1.0 Manganese_e + 1.0 H__e = 1.0 H__c + 1.0 Manganese_c
rxn10254	0.000116182	1.0 1_2_Dianteisoheptadecanoyl_sn_glycerol_c + 1.0 ATP_c = 1.0 1_2_dianteisoheptadecanoyl_sn_glycerol_3_phosphate_c + 1.0 ADP_c
rxn10239	0.000116182	1.0 H2O_c + 1.0 1_2_dianteisoheptadecanoyl_sn_glycerol_3_phosphate_c = 1.0 H__c + 1.0 Orthophosphate_c + 1.0 1_2_Dianteisoheptadecanoyl_sn_glycerol_c
rxn05459	0.000115214	1.0 CoA_c + 1.0 Octodecanoyl_ACP_c = 1.0 Stearoyl_CoA_c + 1.0 Acyl_carrier_protein_c
rxn05458	0.000115214	1.0 Hexadecanoyl__acp__c + 1.0 CoA_c = 1.0 Palmitoyl_CoA_c + 1.0 Acyl_carrier_protein_c
rxn05457	0.000115214	1.0 Tetradecanoyl__acp__c + 1.0 CoA_c = 1.0 Tetradecanoyl_CoA_c + 1.0 Acyl_carrier_protein_c
rxn05456	0.000115214	1.0 CoA_c + 1.0 14_methyl_pentadecanoyl_ACP_c = 1.0 fa6coa_c + 1.0 Acyl_carrier_protein_c
rxn05455	0.000115214	1.0 12_methyl_tridecanoyl_ACP_c + 1.0 CoA_c = 1.0 fa1coa_c + 1.0 Acyl_carrier_protein_c
rxn05453	0.000115214	1.0 CoA_c + 1.0 13_methyl_tetra_decanoyl_ACP_c = 1.0 Acyl_carrier_protein_c + 1.0 fa3coa_c
rxn05451	0.000115214	1.0 CoA_c + 1.0 12_methyl_tetra_decanoyl_ACP_c = 1.0 fa4coa_c + 1.0 Acyl_carrier_protein_c
rxn05408	0.000115214	1.0 2_Methylpropanoyl_CoA_c + 1.0 Acyl_carrier_protein_c = 1.0 CoA_c + 1.0 2_methylpropionyl_ACP_c
rxn00400	9.41882e-05	1.0 L_Arginine_c + 1.0 NADPH_c + 1.0 Oxygen_c = 1.0 H2O_c + 1.0 N__omega__Hydroxyarginine_c + 1.0 NADP__c
rxn00082	9.41882e-05	1.0 NADPH_c + 2.0 N__omega__Hydroxyarginine_c + 1.0 Oxygen_c = 2.0 L_Citrulline_c + 3.0 H__c + 1.0 NADP__c + 2.0 Nitric_oxide_c
rxn05436	9.38114e-05	1.0 10_methyl_trans_dodec_2_enoyl_ACP_c + 1.0 NADH_c + 1.0 H__c = 1.0 NAD__c + 1.0 10_methyl_dodecanoyl_ACP_c
rxn02360	9.28739e-05	1.0 trans_4_Hydroxy_L_proline_c = 1.0 cis_4_Hydroxy_D_proline_c
rxn00022	8.32924e-05	1.0 H2O_c + 1.0 Maltose_c = 2.0 D_Glucose_c
rxn10125	4.99067e-05	1.0 NADH_c + 1.0 NADP__c + 2.0 H__e = 1.0 NAD__c + 2.0 H__c + 1.0 NADPH_c
rxn00083	4.99067e-05	1.0 NAD__c + 1.0 NADPH_c = 1.0 NADH_c + 1.0 NADP__c
rxn00165	4.1213e-05	1.0 L_Serine_c = 1.0 Pyruvate_c + 1.0 NH3_c
rxn01366	4.05451e-05	1.0 H__c + 1.0 Orthophosphate_c + 1.0 Uridine_c = 1.0 Uracil_c + 1.0 alpha_D_Ribose_1_phosphate_c
rxn05611	3.9946e-05	1.0 H__e + 1.0 D_Mannose_e = 1.0 H__c + 1.0 D_Mannose_c
rxn05225	3.9946e-05	1.0 H__c + 1.0 D_Glucose_e + 1.0 D_Mannose_c = 1.0 H__e + 1.0 D_Glucose_c + 1.0 D_Mannose_e
rxn10770	2.70202e-05	1.0 NAD__c + 1.0 Choline_c = 1.0 H__c + 1.0 NADH_c + 1.0 Betaine_aldehyde_c
rxn01109	1.99696e-05	1.0 beta_D_Glucose_c + 1.0 NADP__c = 1.0 D_Glucono_1_5_lactone_c + 1.0 H__c + 1.0 NADPH_c
rxn01108	1.99696e-05	1.0 beta_D_Glucose_c + 1.0 NAD__c = 1.0 D_Glucono_1_5_lactone_c + 1.0 H__c + 1.0 NADH_c
rxn01492	1.95666e-05	1.0 D_Fructose_1_phosphate_c + 1.0 ATP_c = 1.0 D_Fructose_1_6_bisphosphate_c + 1.0 ADP_c
rxn10297	1.40888e-05	24.0 CDP_glycerol_c + 1.0 Diglucosyl_1_2_diisohexadecanoylglycerol_c = 1.0 Isohexadecanoyllipoteichoic_acid__n_24___linked__unsubstituted_c + 24.0 CMP_c
rxn10296	1.40888e-05	24.0 CDP_glycerol_c + 1.0 Diglucosyl_1_2_dianteisopentadecanoylglycerol_c = 1.0 Anteisopentadecanoyllipoteichoic_acid__n_24___linked__unsubstituted_c + 24.0 CMP_c
rxn10295	1.40888e-05	24.0 CDP_glycerol_c + 1.0 Diglucosyl_1_2_diisopentadecanoylglycerol_c = 1.0 Isopentadecanoyllipoteichoic_acid__n_24___linked__unsubstituted_c + 24.0 CMP_c
rxn10294	1.40888e-05	1.0 Diglucosyl_1_2_diisotetradecanoylglycerol_c + 24.0 CDP_glycerol_c = 24.0 CMP_c + 1.0 Isotetradecanoyllipoteichoic_acid__n_24___linked__unsubstituted_c
rxn10290	1.40888e-05	1.0 Diglucosyl_1_2_dimyristoylglycerol_c + 24.0 CDP_glycerol_c = 1.0 Myristoyllipoteichoic_acid__n_24___linked__unsubstituted_c + 24.0 CMP_c
rxn10289	1.40888e-05	24.0 CDP_glycerol_c + 1.0 Diglucosyl_1_2_dipalmitoylglycerol_c = 1.0 Palmitoyllipoteichoic_acid__n_24___linked__unsubstituted_c + 24.0 CMP_c
t_cpd00065	9.79716e-06	1.0 L_Tryptophan_e + 1.0 H__e = 1.0 L_Tryptophan_c + 1.0 H__c
rxn03974	5.10708e-06	1.0 H__c + 1.0 NADH_c + 1.0 FMN_c = 1.0 flavin_mononucleotide_reduced_c + 1.0 NAD__c
rxn01446	4.44645e-06	1.0 H__c + 1.0 Orthophosphate_c + 1.0 Deoxyguanosine_c = 1.0 Guanine_c + 1.0 2_Deoxy_D_ribose_1_phosphate_c
rxn01985	3.6278e-06	1.0 H__c + 1.0 Orthophosphate_c + 1.0 Deoxyinosine_c = 1.0 Hypoxanthine_c + 1.0 2_Deoxy_D_ribose_1_phosphate_c
rxn01930	1.51244e-06	1.0 H2O_c + 1.0 3_Hydroxy_L_kynurenine_c = 1.0 L_Alanine_c + 1.0 H__c + 1.0 3_Hydroxyanthranilate_c
rxn00478	1.51244e-06	1.0 L_Tryptophan_c + 1.0 Oxygen_c = 1.0 L_Formylkynurenine_c
rxn01630	8.66307e-07	1.0 5_Aminopentanamide_c + 1.0 H2O_c = 1.0 5_Aminopentanoate_c + 1.0 NH3_c
rxn00616	6.20212e-07	1.0 sn_Glycerol_3_phosphate_c + 1.0 FAD_c = 1.0 Glycerone_phosphate_c + 1.0 FADH2_c
rxn00772	6.87748e-08	1.0 D_Ribose_c + 1.0 ATP_c = 1.0 ADP_c + 1.0 D_Ribose_5_phosphate_c
rxn01021	1.05318e-09	1.0 H2O_c + 1.0 5__Methylthioadenosine_c = 1.0 5_Methylthio_D_ribose_c + 1.0 Adenine_c
rxn00143	1.05318e-09	1.0 H2O_c + 1.0 S_Adenosyl_L_homocysteine_c = 1.0 S_Ribosyl_L_homocysteine_c + 1.0 Adenine_c
trTylosin_c_ext	0	1.0 Tylosin_c = 1.0 Tylosin_ext
trS_Adenosyl_L_homocysteine_c_ext	0	1.0 S_Adenosyl_L_homocysteine_c = 1.0 S_Adenosyl_L_homocysteine_ext
rxn12847	0	1.0 H2O_c + 1.0 Gly_Tyr_c = 1.0 L_Tyrosine_c + 1.0 Glycine_c
rxn12846	0	1.0 H2O_c + 1.0 Gly_Phe_c = 1.0 L_Phenylalanine_c + 1.0 Glycine_c
rxn12845	0	1.0 Gly_Leu_c + 1.0 H2O_c = 1.0 L_Leucine_c + 1.0 Glycine_c
rxn12844	0	1.0 H2O_c + 1.0 Gly_Cys_c = 1.0 L_Cysteine_c + 1.0 Glycine_c
rxn12646	0	1.0 H2O_c + 1.0 Gly_Gln_c = 1.0 L_Glutamine_c + 1.0 Glycine_c
rxn12645	0	1.0 H2O_c + 1.0 gly_asn_L_c = 1.0 Glycine_c + 1.0 L_Asparagine_c
rxn12644	0	1.0 H2O_c + 1.0 ala_L_Thr_L_c = 1.0 L_Threonine_c + 1.0 L_Alanine_c
rxn12643	0	1.0 Ala_Leu_c + 1.0 H2O_c = 1.0 L_Alanine_c + 1.0 L_Leucine_c
rxn12642	0	1.0 Ala_His_c + 1.0 H2O_c = 1.0 L_Alanine_c + 1.0 L_Histidine_c
rxn12641	0	1.0 L_alanylglycine_c + 1.0 H2O_c = 1.0 L_Alanine_c + 1.0 Glycine_c
rxn12640	0	1.0 H2O_c + 1.0 ala_L_glu_L_c = 1.0 L_Alanine_c + 1.0 L_Glutamate_c
rxn12639	0	1.0 H2O_c + 1.0 Ala_Gln_c = 1.0 L_Glutamine_c + 1.0 L_Alanine_c
rxn12638	0	1.0 H2O_c + 1.0 gly_pro_L_c = 1.0 H__c + 1.0 L_Proline_c + 1.0 Glycine_c
rxn12637	0	1.0 H2O_c + 1.0 gly_asp_L_c = 1.0 L_Aspartate_c + 1.0 Glycine_c
rxn12636	0	1.0 met_L_ala_L_c + 1.0 H__c + 1.0 H2O_c = 1.0 L_Alanine_c + 1.0 L_Methionine_c
rxn12635	0	1.0 H2O_c + 1.0 Gly_Met_c = 1.0 L_Methionine_c + 1.0 Glycine_c
rxn12634	0	1.0 gly_glu_L_c + 1.0 H2O_c = 1.0 L_Glutamate_c + 1.0 Glycine_c
rxn12633	0	1.0 H2O_c + 1.0 ala_L_asp_L_c = 1.0 L_Alanine_c + 1.0 L_Aspartate_c
rxn12512	0	1.0 D_4__Phosphopantothenate_c + 1.0 L_Cysteine_c + 1.0 ATP_c = 1.0 _R__4__Phosphopantothenoyl_L_cysteine_c + 1.0 Diphosphate_c + 1.0 AMP_c
rxn12510	0	1.0 Pantothenate_c + 1.0 ATP_c = 1.0 D_4__Phosphopantothenate_c + 1.0 ADP_c
rxn10954	0	23.0 H__c + 7.0 Malonyl__acyl_carrier_protein__c + 16.0 NADPH_c + 1.0 Acetoacetyl__acp__c = 8.0 H2O_c + 7.0 CO2_c + 1.0 Octadecanoyl_ACP_c + 7.0 Acyl_carrier_protein_c + 16.0 NADP__c
rxn10571	0	1.0 H2O_c + 1.0 ATP_c + 1.0 Magnesium_e = 1.0 Magnesium_c + 1.0 Orthophosphate_c + 1.0 ADP_c + 1.0 H__c
rxn10481	0	1.0 H2O_c + 1.0 Copper2_e + 1.0 ATP_c = 1.0 H__c + 1.0 Orthophosphate_c + 1.0 Copper2_c + 1.0 ADP_c
rxn10473	0	1.0 Cl__e = 1.0 Cl__c
rxn10320	0	24.0 D_Alanine_c + 1.0 Anteisoheptadecanoyllipoteichoic_acid__n_24___linked__unsubstituted_c + 24.0 ATP_c = 24.0 Diphosphate_c + 24.0 AMP_c + 1.0 Anteisoheptadecanoyllipoteichoic_acid__n_24___linked__D_alanine_substituted_c
rxn10319	0	24.0 D_Alanine_c + 1.0 Isoheptadecanoyllipoteichoic_acid__n_24___linked__unsubstituted_c + 24.0 ATP_c = 24.0 Diphosphate_c + 24.0 AMP_c + 1.0 Isoheptadecanoyllipoteichoic_acid__n_24___linked__D_alanine_substituted_c
rxn10318	0	24.0 D_Alanine_c + 1.0 Stearoyllipoteichoic_acid__n_24___linked__unsubstituted_c + 24.0 ATP_c = 24.0 Diphosphate_c + 1.0 Stearoyllipoteichoic_acid__n_24___linked__D_alanine_substituted_c + 24.0 AMP_c
rxn10311	0	1.0 Anteisoheptadecanoyllipoteichoic_acid__n_24___linked__unsubstituted_c + 24.0 UDP_N_acetyl_D_glucosamine_c = 24.0 UDP_c + 1.0 Anteisoheptadecanoyllipoteichoic_acid__n_24___linked__N_acetyl_D_glucosamine_c
rxn10310	0	1.0 Isoheptadecanoyllipoteichoic_acid__n_24___linked__unsubstituted_c + 24.0 UDP_N_acetyl_D_glucosamine_c = 24.0 UDP_c + 1.0 Isoheptadecanoyllipoteichoic_acid__n_24___linked__N_acetyl_D_glucosamine_c
rxn10309	0	24.0 UDP_N_acetyl_D_glucosamine_c + 1.0 Stearoyllipoteichoic_acid__n_24___linked__unsubstituted_c = 24.0 UDP_c + 1.0 Stearoyllipoteichoic_acid__n_24___linked__N_acetyl_D_glucosamine_c
rxn10302	0	1.0 Anteisoheptadecanoyllipoteichoic_acid__n_24___linked__unsubstituted_c + 24.0 UDP_glucose_c = 24.0 UDP_c + 1.0 Anteisoheptadecanoyllipoteichoic_acid__n_24___linked__glucose_substituted_c
rxn10301	0	1.0 Isoheptadecanoyllipoteichoic_acid__n_24___linked__unsubstituted_c + 24.0 UDP_glucose_c = 24.0 UDP_c + 1.0 Isoheptadecanoyllipoteichoic_acid__n_24___linked__glucose_substituted_c
rxn10300	0	1.0 Stearoyllipoteichoic_acid__n_24___linked__unsubstituted_c + 24.0 UDP_glucose_c = 1.0 Stearoyllipoteichoic_acid__n_24___linked__glucose_substituted_c + 24.0 UDP_c
rxn10293	0	24.0 CDP_glycerol_c + 1.0 Diglucosyl_1_2_dianteisoheptadecanoylglycerol_c = 1.0 Anteisoheptadecanoyllipoteichoic_acid__n_24___linked__unsubstituted_c + 24.0 CMP_c
rxn10292	0	24.0 CDP_glycerol_c + 1.0 Diglucosyl_1_2_diisoheptadecanoylglycerol_c = 1.0 Isoheptadecanoyllipoteichoic_acid__n_24___linked__unsubstituted_c + 24.0 CMP_c
rxn10291	0	1.0 Diglucosyl_1_2_distearoylglycerol_c + 24.0 CDP_glycerol_c = 1.0 Stearoyllipoteichoic_acid__n_24___linked__unsubstituted_c + 24.0 CMP_c
rxn10284	0	1.0 1_2_Dianteisoheptadecanoyl_sn_glycerol_c + 1.0 UDP_glucose_c = 1.0 UDP_c + 1.0 Monoglucosyl_1_2_dianteisoheptadecanoylglycerol_c
rxn10283	0	1.0 1_2_Diisoheptadecanoyl_sn_glycerol_c + 1.0 UDP_glucose_c = 1.0 UDP_c + 1.0 Monoglucosyl_1_2_diisoheptadecanoylglycerol_c
rxn10282	0	1.0 1_2_Diacyl_sn_glycerol_dioctadecanoyl_c + 1.0 UDP_glucose_c = 1.0 UDP_c + 1.0 Monoglucosyl_1_2_distearoylglycerol_c
rxn10275	0	1.0 Monoglucosyl_1_2_dianteisoheptadecanoylglycerol_c + 1.0 UDP_glucose_c = 1.0 UDP_c + 1.0 Diglucosyl_1_2_dianteisoheptadecanoylglycerol_c
rxn10274	0	1.0 Monoglucosyl_1_2_diisoheptadecanoylglycerol_c + 1.0 UDP_glucose_c = 1.0 UDP_c + 1.0 Diglucosyl_1_2_diisoheptadecanoylglycerol_c
rxn10273	0	1.0 UDP_glucose_c + 1.0 Monoglucosyl_1_2_distearoylglycerol_c = 1.0 Diglucosyl_1_2_distearoylglycerol_c + 1.0 UDP_c
rxn10264	0	1.0 sn_Glycerol_3_phosphate_c + 1.0 CDP_1_2_diisohexadecanoylglycerol_c = 1.0 Diisohexadecanoylphosphatidylglycerophosphate_c + 1.0 CMP_c
rxn10263	0	1.0 sn_Glycerol_3_phosphate_c + 1.0 CDP_1_2_dianteisopentadecanoylglycerol_c = 1.0 Dianteisopentadecanoylphosphatidylglycerophosphate_c + 1.0 CMP_c
rxn10262	0	1.0 sn_Glycerol_3_phosphate_c + 1.0 CDP_1_2_diisopentadecanoylglycerol_c = 1.0 CMP_c + 1.0 Diisopentadecanoylphosphatidylglycerophosphate_c
rxn10261	0	1.0 sn_Glycerol_3_phosphate_c + 1.0 CDP_1_2_diisotetradecanoylglycerol_c = 1.0 CMP_c + 1.0 Diisotetradecanoylphosphatidylglycerophosphate_c
rxn10260	0	1.0 CDP_1_2_dianteisoheptadecanoylglycerol_c + 1.0 sn_Glycerol_3_phosphate_c = 1.0 Dianteisoheptadecanoylphosphatidylglycerophosphate_c + 1.0 CMP_c
rxn10259	0	1.0 sn_Glycerol_3_phosphate_c + 1.0 CDP_1_2_diisoheptadecanoylglycerol_c = 1.0 Diisoheptadecanoylphosphatidylglycerophosphate_c + 1.0 CMP_c
rxn10225	0	1.0 CTP_c + 1.0 1_2_diisohexadecanoyl_sn_glycerol_3_phosphate_c = 1.0 Diphosphate_c + 1.0 CDP_1_2_diisohexadecanoylglycerol_c
rxn10224	0	1.0 CTP_c + 1.0 1_2_dianteisopentadecanoyl_sn_glycerol_3_phosphate_c = 1.0 Diphosphate_c + 1.0 CDP_1_2_dianteisopentadecanoylglycerol_c
rxn10223	0	1.0 CTP_c + 1.0 1_2_diisopentadecanoyl_sn_glycerol_3_phosphate_c = 1.0 Diphosphate_c + 1.0 CDP_1_2_diisopentadecanoylglycerol_c
rxn10222	0	1.0 CTP_c + 1.0 1_2_diisotetradecanoyl_sn_glycerol_3_phosphate_c = 1.0 Diphosphate_c + 1.0 CDP_1_2_diisotetradecanoylglycerol_c
rxn10221	0	1.0 CTP_c + 1.0 1_2_dianteisoheptadecanoyl_sn_glycerol_3_phosphate_c = 1.0 CDP_1_2_dianteisoheptadecanoylglycerol_c + 1.0 Diphosphate_c
rxn10220	0	1.0 CTP_c + 1.0 1_2_diisoheptadecanoyl_sn_glycerol_3_phosphate_c = 1.0 Diphosphate_c + 1.0 CDP_1_2_diisoheptadecanoylglycerol_c
rxn10219	0	1.0 1_isohexadecanoyl_sn_glycerol_3_phosphate_c + 1.0 fa6coa_c = 1.0 1_2_diisohexadecanoyl_sn_glycerol_3_phosphate_c + 1.0 CoA_c
rxn10218	0	1.0 fa4coa_c + 1.0 1_anteisopentadecanoyl_sn_glycerol_3_phosphate_c = 1.0 CoA_c + 1.0 1_2_dianteisopentadecanoyl_sn_glycerol_3_phosphate_c
rxn10217	0	1.0 fa3coa_c + 1.0 1_isopentadecanoyl_sn_glycerol_3_phosphate_c = 1.0 CoA_c + 1.0 1_2_diisopentadecanoyl_sn_glycerol_3_phosphate_c
rxn10216	0	1.0 fa1coa_c + 1.0 1_isotetradecanoyl_sn_glycerol_3_phosphate_c = 1.0 1_2_diisotetradecanoyl_sn_glycerol_3_phosphate_c + 1.0 CoA_c
rxn10215	0	1.0 1_anteisoheptadecanoyl_sn_glycerol_3_phosphate_c + 1.0 fa12coa_c = 1.0 CoA_c + 1.0 1_2_dianteisoheptadecanoyl_sn_glycerol_3_phosphate_c
rxn10214	0	1.0 fa11coa_c + 1.0 1_isoheptadecanoyl_sn_glycerol_3_phosphate_c = 1.0 CoA_c + 1.0 1_2_diisoheptadecanoyl_sn_glycerol_3_phosphate_c
rxn10213	0	1.0 1_octadecanoyl_sn_glycerol_3_phosphate_c + 1.0 Stearoyl_CoA_c = 1.0 1_2_dioctadecanoyl_sn_glycerol_3_phosphate_c + 1.0 CoA_c
rxn10212	0	1.0 Tetradecanoyl_CoA_c + 1.0 1_tetradecanoyl_sn_glycerol_3_phosphate_c = 1.0 CoA_c + 1.0 1_2_ditetradecanoyl_sn_glycerol_3_phosphate_c
rxn10211	0	1.0 Palmitoyl_CoA_c + 1.0 1_hexadecanoyl_sn_glycerol_3_phosphate_c = 1.0 CoA_c + 1.0 1_2_dihexadecanoyl_sn_glycerol_3_phosphate_c
rxn10206	0	1.0 sn_Glycerol_3_phosphate_c + 1.0 fa12coa_c = 1.0 CoA_c + 1.0 1_anteisoheptadecanoyl_sn_glycerol_3_phosphate_c
rxn10205	0	1.0 sn_Glycerol_3_phosphate_c + 1.0 fa11coa_c = 1.0 CoA_c + 1.0 1_isoheptadecanoyl_sn_glycerol_3_phosphate_c
rxn10199	0	1.0 Undecaprenyl_diphospho_N_acetylmuramoyl__N_acetylglucosamine__L__alanyl_D_glutamyl_meso_2_6_diaminopimeloyl_D_alanyl_D_alanine_c + 1.0 Peptidoglycan_polymer__n_1_subunits__c = 1.0 Peptidoglycan_polymer__n_subunits__c + 1.0 di_trans_poly_cis_Undecaprenyl_diphosphate_c
rxn10197	0	1.0 H2O_c + 30.0 UDP_N_acetyl_D_galactosamine_c + 30.0 UDP_glucose_c = 30.0 UMP_c + 30.0 UDP_c + 1.0 tcam_c
rxn10196	0	1.0 Peptidoglycan_polymer__n_1_subunits__c + 1.0 45_Alanyl_phosphoglyceryl__N_Acetyl_beta_D_mannosaminyl_1_4_N_acetyl_D_glucosaminyldiphosphoundecaprenol_c = 1.0 glycerol_teichoic_acid__n_45___linked__D_ala_substituted_c + 1.0 di_trans_poly_cis_Undecaprenyl_phosphate_c
rxn10195	0	1.0 Peptidoglycan_polymer__n_1_subunits__c + 1.0 45_Glucosyl_phosphoglyceryl__N_Acetyl_beta_D_mannosaminyl_1_4_N_acetyl_D_glucosaminyldiphosphoundecaprenol_c = 1.0 glycerol_teichoic_acid__n_45___linked__glucose_substituted_c + 1.0 di_trans_poly_cis_Undecaprenyl_phosphate_c
rxn10194	0	1.0 Peptidoglycan_polymer__n_1_subunits__c + 1.0 45_Phosphoglyceryl__N_Acetyl_beta_D_mannosaminyl_1_4_N_acetyl_D_glucosaminyldiphosphoundecaprenol_c = 1.0 di_trans_poly_cis_Undecaprenyl_phosphate_c + 1.0 glycerol_teichoic_acid__n_45___linked__unsubstituted_c
rxn10193	0	1.0 45_Phosphoglyceryl__N_Acetyl_beta_D_mannosaminyl_1_4_N_acetyl_D_glucosaminyldiphosphoundecaprenol_c + 45.0 UDP_glucose_c = 45.0 UDP_c + 1.0 45_Glucosyl_phosphoglyceryl__N_Acetyl_beta_D_mannosaminyl_1_4_N_acetyl_D_glucosaminyldiphosphoundecaprenol_c
rxn10192	0	1.0 N_Acetyl_beta_D_mannosaminyl_1_4_N_acetyl_D__glucosaminyldiphosphoundecaprenol_c + 45.0 CDP_glycerol_c = 1.0 45_Phosphoglyceryl__N_Acetyl_beta_D_mannosaminyl_1_4_N_acetyl_D_glucosaminyldiphosphoundecaprenol_c + 45.0 CMP_c
rxn10191	0	45.0 D_Alanine_c + 1.0 45_Phosphoglyceryl__N_Acetyl_beta_D_mannosaminyl_1_4_N_acetyl_D_glucosaminyldiphosphoundecaprenol_c + 45.0 ATP_c = 45.0 Diphosphate_c + 45.0 AMP_c + 1.0 45_Alanyl_phosphoglyceryl__N_Acetyl_beta_D_mannosaminyl_1_4_N_acetyl_D_glucosaminyldiphosphoundecaprenol_c
rxn10126	0	1.0 FADH2_c + 1.0 Ubiquinone_8_c = 1.0 FAD_c + 1.0 Ubiquinol_8_c
rxn10113	0	2.5 H__c + 0.5 Oxygen_c + 1.0 Ubiquinol_8_c = 1.0 H2O_c + 1.0 Ubiquinone_8_c + 2.5 H__e
rxn10060	0	1.0 NAD__c + 1.0 dTTP_c = 1.0 dTDP_c + 1.0 NADP__c
rxn10042	0	1.0 Orthophosphate_c + 1.0 ADP_c + 4.0 H__e = 3.0 H__c + 1.0 H2O_c + 1.0 ATP_c
rxn09562	0	1.0 dATP_c + 1.0 GMP_c = 1.0 dADP_c + 1.0 GDP_c
rxn09310	0	1.0 L_Tyrosine_c + 1.0 L_Cysteine_c + 1.0 ATP_c + 1.0 1_Deoxy_D_xylulose_5_phosphate_c = 1.0 H2O_c + 1.0 4_Methyl_5__2_phosphoethyl__thiazole_c + 1.0 AMP_c + 1.0 L_Alanine_c + 1.0 4_Hydroxy_benzyl_alcohol_c + 1.0 CO2_c + 1.0 Diphosphate_c
rxn09272	0	1.0 Succinate_c + 1.0 Ubiquinone_8_c = 1.0 Fumarate_c + 1.0 Ubiquinol_8_c
rxn09240	0	1.0 Sulfate_c + 1.0 H2O_c + 1.0 GTP_c + 1.0 ATP_c = 1.0 Orthophosphate_c + 1.0 GDP_c + 1.0 Diphosphate_c + 1.0 Adenylyl_sulfate_c
rxn09114	0	1.0 sn_Glycerol_3_phosphate_c + 1.0 CDP_1_2_dioctadec_11_enoylglycerol_c = 1.0 Phosphatidylglycerophosphate_dioctadec_11_enoyl_c + 1.0 CMP_c
rxn09113	0	1.0 CDP_1_2_dioctadecanoylglycerol_c + 1.0 sn_Glycerol_3_phosphate_c = 1.0 CMP_c + 1.0 Phosphatidylglycerophosphate_dioctadecanoyl_c
rxn09112	0	1.0 sn_Glycerol_3_phosphate_c + 1.0 CDP_1_2_dihexadec_9_enoylglycerol_c = 1.0 Phosphatidylglycerophosphate_dihexadec_9_enoyl_c + 1.0 CMP_c
rxn09111	0	1.0 sn_Glycerol_3_phosphate_c + 1.0 CDP_1_2_dihexadecanoylglycerol_c = 1.0 Phosphatidylglycerophosphate_dihexadecanoyl_c + 1.0 CMP_c
rxn09110	0	1.0 CDP_1_2_ditetradec_7_enoylglycerol_c + 1.0 sn_Glycerol_3_phosphate_c = 1.0 CMP_c + 1.0 Phosphatidylglycerophosphate_ditetradec_7_enoyl_c
rxn09109	0	1.0 sn_Glycerol_3_phosphate_c + 1.0 CDP_1_2_ditetradecanoylglycerol_c = 1.0 CMP_c + 1.0 Phosphatidylglycerophosphate_ditetradecanoyl_c
rxn09108	0	1.0 sn_Glycerol_3_phosphate_c + 1.0 CDP_1_2_didodecanoylglycerol_c = 1.0 Phosphatidylglycerophosphate_didodecanoyl_c + 1.0 CMP_c
rxn08756	0	1.0 1_Hydroxy_2_methyl_2_butenyl_4_diphosphate_c + 1.0 H__c + 1.0 NADH_c = 1.0 NAD__c + 1.0 Isopentenyl_diphosphate_c + 1.0 H2O_c
rxn08528	0	1.0 Fumarate_c + 1.0 2_Demethylmenaquinol_8_c = 1.0 Succinate_c + 1.0 2_Demethylmenaquinone_8_c
rxn08527	0	1.0 Fumarate_c + 1.0 Menaquinol_8_c = 1.0 Succinate_c + 1.0 Menaquinone_8_c
[truncated: 547 more rows]

## Sheet: Aureomycin
Reaction name	r2 value	Reaction formula
[truncated: 1,987 more rows]

## Sheet: Tetracycline
Reaction name	r2 value	Reaction formula
[truncated: 1,988 more rows]

[truncated: 11 more sheets: Butirosin, Neomycin, Streptomycin, Clorobiocin, Coumermycin, Novobiocin, Enterobactin, Pyochelin, Cephalosporin, Penicillin, Clavulanic acid]
